# Supplementary material for: CRISPR–Cas9 screens in human cells and primary neurons identify modifiers of C9ORF72 dipeptide-repeat-protein toxicity
Source: Springer Nature journal article supplement (doi:10.1038/s41588-018-0070-7), 2018-02-28
Supplement: MOESM4 [file 41588_2018_70_MOESM4_ESM%20(1).xlsx]

## Sheet: Screen Table Legend
Screen Table Legend
# elements		The # elements indicate the number of guides in either replicate
casTLE Effect		indicates the magnitude and sign of the effect, where a negative effect means the gene is depleted in the treated population and a positive effect means the gene is enriched in the treated population compared to untreated control
casTLE Score		indicates the statistical confidence-larger being more confident

## Sheet: GenomeWide_K562_PR20_Screen
#GeneID	Symbol	GeneInfo	Localization	Process	Function	# elements 1	casTLE Effect 1	casTLE Score 1	# elements 2	casTLE Effect 2	casTLE Score 2	Combo casTLE Effect	Combo casTLE Score	casTLE p-value	Minimum Effect Estimate	Maximum Effect Estimate	10% FDR
ENSG00000164626	KCNK5	potassium channel, subfamily K, member 5	integral component of plasma membrane|	potassium ion transport|excretion|regulation of ion transmembrane transport|potassium ion transmembrane transport|	voltage-gated ion channel activity|potassium channel activity|	10	13.7	254	10	13.4	258	13.5	511	1e-06	12.3	16.4	1
ENSG00000017483	SLC38A5	solute carrier family 38, member 5	plasma membrane|integral component of membrane|	amino acid transmembrane transport|ion transport|amino acid transport|glycine transport|transmembrane transport|	glycine transmembrane transporter activity|	10	10.9	130	10	10.1	150	10.4	279	1e-06	9.16	12.9	1
ENSG00000005339	CREBBP	CREB binding protein	histone acetyltransferase complex|nuclear chromatin|condensed chromosome outer kinetochore|nucleus|nucleus|nucleoplasm|transcription factor complex|cytoplasm|nuclear body|	negative regulation of transcription from RNA polymerase II promoter|response to hypoxia|chromatin organization|regulation of transcription, DNA-templated|regulation of transcription, DNA-templated|transcription initiation from RNA polymerase II promoter|protein complex assembly|signal transduction|Notch signaling pathway|regulation of smoothened signaling pathway|gene expression|viral process|hi…	core promoter proximal region sequence-specific DNA binding|RNA polymerase II core promoter proximal region sequence-specific DNA binding transcription factor activity involved in negative regulation of transcription|RNA polymerase II transcription factor binding|RNA polymerase II activating transcription factor binding|RNA polymerase II transcription coactivator activity|RNA polymerase II transc…	10	10.2	114	10	9.88	140	9.95	254	1e-06	8.89	12.5	1
ENSG00000147050	KDM6A	lysine (K)-specific demethylase 6A	nucleus|histone methyltransferase complex|	in utero embryonic development|neural tube closure|respiratory system process|heart development|somite rostral/caudal axis specification|mesodermal cell differentiation|notochord morphogenesis|histone H3-K4 methylation|oxidation-reduction process|canonical Wnt signaling pathway|histone H3-K27 demethylation|	RNA polymerase II core promoter proximal region sequence-specific DNA binding|metal ion binding|dioxygenase activity|histone demethylase activity (H3-K27 specific)|	9	9.14	68	9	9.49	91.5	9.34	159	1e-06	7.67	12.1	1
ENSG00000069849	ATP1B3	ATPase, Na+/K+ transporting, beta 3 polypeptide	plasma membrane|sodium:potassium-exchanging ATPase complex|caveola|melanosome|extracellular vesicular exosome|	transport|potassium ion transport|blood coagulation|ion transmembrane transport|sodium ion transmembrane transport|sodium ion transmembrane transport|leukocyte migration|transmembrane transport|	sodium:potassium-exchanging ATPase activity|	10	9.78	69.3	10	9.83	80.5	9.79	149	1e-06	7.93	13.2	1
ENSG00000141279	NPEPPS	aminopeptidase puromycin sensitive	nucleus|cytosol|extracellular vesicular exosome|	protein polyubiquitination|antigen processing and presentation of peptide antigen via MHC class I|proteolysis|cellular response to hypoxia|	aminopeptidase activity|metallopeptidase activity|zinc ion binding|	10	8.73	78.6	10	7.67	71.6	8.22	149	1e-06	6.98	10.5	1
ENSG00000115289	PCGF1	polycomb group ring finger 1	nucleus|PcG protein complex|	transcription, DNA-templated|regulation of transcription, DNA-templated|histone H2A monoubiquitination|	protein binding|protein C-terminus binding|zinc ion binding|	10	-2.03	16.7	10	-6.11	128	-5.84	138	1e-06	-8.01	-4.53	1
ENSG00000167548	KMT2D	lysine (K)-specific methyltransferase 2D	nucleus|histone methyltransferase complex|	oocyte growth|in utero embryonic development|chromatin silencing|transcription, DNA-templated|regulation of transcription, DNA-templated|positive regulation of cell proliferation|positive regulation of intracellular estrogen receptor signaling pathway|response to estrogen|positive regulation of transcription from RNA polymerase II promoter|oogenesis|histone H3-K4 methylation|	DNA binding|protein binding|zinc ion binding|histone-lysine N-methyltransferase activity|transcription regulatory region DNA binding|	10	8.41	72.9	10	7.19	65.7	8.1	137	1e-06	6.53	10.4	1
ENSG00000163399	ATP1A1	ATPase, Na+/K+ transporting, alpha 1 polypeptide	endosome|endoplasmic reticulum|Golgi apparatus|plasma membrane|plasma membrane|sodium:potassium-exchanging ATPase complex|caveola|membrane|integral component of membrane|basolateral plasma membrane|T-tubule|melanosome|protein complex|extracellular vesicular exosome|	regulation of the force of heart contraction|regulation of sodium ion transport|ATP biosynthetic process|regulation of blood pressure|potassium ion import|negative regulation of glucocorticoid biosynthetic process|ion transmembrane transport|sodium ion transmembrane transport|sodium ion transmembrane transport|sodium ion transmembrane transport|response to drug|negative regulation of heart contra…	sodium:potassium-exchanging ATPase activity|protein binding|ATP binding|protein kinase binding|protein domain specific binding|ankyrin binding|potassium ion binding|sodium ion binding|ADP binding|phosphatidylinositol 3-kinase binding|chaperone binding|	9	10.7	55.9	10	9.84	70.4	10.2	126	1e-06	8.1	13.5	1
ENSG00000131446	MGAT1	mannosyl (alpha-1,3-)-glycoprotein beta-1,2-N-acetylglucosaminyltransferase	Golgi membrane|membrane|integral component of membrane|extracellular vesicular exosome|	in utero embryonic development|carbohydrate metabolic process|UDP-N-acetylglucosamine catabolic process|protein glycosylation|protein N-linked glycosylation via asparagine|post-translational protein modification|cellular protein metabolic process|	alpha-1,3-mannosylglycoprotein 2-beta-N-acetylglucosaminyltransferase activity|acetylglucosaminyltransferase activity|metal ion binding|	9	6.95	46.8	10	8.27	74.8	7.98	121	1e-06	6.45	10	1
ENSG00000264187	RP11-45M22.4	N/A	None	None	None	10	7.44	57	10	7.37	60.5	7.43	117	1e-06	6.1	9.95	1
ENSG00000269279	AL136376.1	N/A	None	None	None	10	10.4	47	10	10.1	69.4	10.3	116	1e-06	8.14	13.2	1
ENSG00000254462	TMX2-CTNND1	TMX2-CTNND1 readthrough (NMD candidate)	None	None	None	10	8.02	53.7	10	8.83	59.9	8.39	113	1e-06	6.67	10.9	1
ENSG00000067955	CBFB	core-binding factor, beta subunit	cellular_component|nucleus|membrane|	osteoblast differentiation|transcription from RNA polymerase II promoter|lymphocyte differentiation|myeloid cell differentiation|positive regulation of transcription from RNA polymerase II promoter|cell maturation|definitive hemopoiesis|	DNA binding|sequence-specific DNA binding transcription factor activity|transcription coactivator activity|protein binding|	10	9.58	53.7	10	8.24	55.5	9.12	108	1e-06	7.21	11.7	1
ENSG00000164180	TMEM161B	transmembrane protein 161B	integral component of membrane|	None	None	10	7.31	48	10	7.15	55.2	7.21	103	1e-06	5.89	9.49	1
ENSG00000204256	BRD2	bromodomain containing 2	nucleus|cytoplasm|	nucleosome assembly|transcription, DNA-templated|regulation of transcription from RNA polymerase II promoter|spermatogenesis|chromatin modification|	chromatin binding|protein binding|lysine-acetylated histone binding|	10	7.38	52.1	10	6.92	49.6	7.2	101	1e-06	5.67	9.43	1
ENSG00000129084	PSMA1	proteasome (prosome, macropain) subunit, alpha type, 1	proteasome complex|nucleus|nucleoplasm|centrosome|cytosol|proteasome core complex|polysome|proteasome core complex, alpha-subunit complex|extracellular vesicular exosome|	G1/S transition of mitotic cell cycle|protein polyubiquitination|mitotic cell cycle|antigen processing and presentation of peptide antigen via MHC class I|antigen processing and presentation of exogenous peptide antigen via MHC class I, TAP-dependent|regulation of cellular amino acid metabolic process|apoptotic process|DNA damage response, signal transduction by p53 class mediator resulting in ce…	RNA binding|threonine-type endopeptidase activity|protein binding|	9	9.47	53.9	7	8.29	45.3	9.01	98.5	1e-06	6.82	12.3	1
ENSG00000140153	WDR20	WD repeat domain 20	None	None	None	9	7.64	45.8	9	7.68	49.8	7.64	95.2	1e-06	5.93	10.2	1
ENSG00000101079	NDRG3	NDRG family member 3	cytoplasm|extracellular vesicular exosome|	spermatogenesis|cell differentiation|negative regulation of cell growth|	molecular_function|	10	10.1	51.9	10	10.4	42.6	10.2	94	1e-06	7.46	13.5	1
ENSG00000154803	FLCN	folliculin	nucleus|cytoplasm|plasma membrane|midbody|cell-cell contact zone|	negative regulation of transcription from RNA polymerase II promoter|negative regulation of transcription from RNA polymerase II promoter|in utero embryonic development|regulation of protein phosphorylation|positive regulation of protein phosphorylation|cell-cell junction assembly|positive regulation of gene expression|negative regulation of gene expression|negative regulation of mitochondrion or…	protein binding|protein complex binding|	10	6.95	41.6	9	8.3	49	7.71	89.4	1e-06	5.99	10.3	1
ENSG00000103197	TSC2	tuberous sclerosis 2	nucleus|cytoplasm|cytoplasm|Golgi apparatus|cytosol|cytosol|caveola|membrane|dendrite|growth cone|TSC1-TSC2 complex|neuronal cell body|perinuclear region of cytoplasm|	response to hypoxia|neural tube closure|negative regulation of protein kinase activity|protein import into nucleus|endocytosis|acute-phase response|cell cycle arrest|epidermal growth factor receptor signaling pathway|heart development|protein localization|negative regulation of cell proliferation|insulin receptor signaling pathway|fibroblast growth factor receptor signaling pathway|phosphatidylin…	GTPase activator activity|protein binding|phosphatase binding|protein homodimerization activity|protein heterodimerization activity|14-3-3 protein binding|	10	5.95	40.4	10	6.28	47.7	6.12	87.6	1e-06	4.86	8.13	1
ENSG00000174093	RP11-1407O15.2	N/A	None	None	None	10	9.29	43.8	10	8.42	41.6	8.54	84.8	1e-06	6.85	12	1
ENSG00000067560	RHOA	ras homolog family member A	cytosol|cytoskeleton|plasma membrane|cell cortex|lamellipodium|cell junction|midbody|cleavage furrow|apical junction complex|extracellular vesicular exosome|	GTP catabolic process|transforming growth factor beta receptor signaling pathway|small GTPase mediated signal transduction|Rho protein signal transduction|axon guidance|blood coagulation|viral process|substantia nigra development|actin cytoskeleton organization|platelet activation|regulation of cell migration|positive regulation of cytokinesis|regulation of osteoblast proliferation|cleavage furro…	GTPase activity|protein binding|GTP binding|myosin binding|	10	-2.54	34.9	10	-4.08	51.4	-3.65	83.6	1e-06	-5.39	-2.51	1
ENSG00000159216	RUNX1	runt-related transcription factor 1	basement membrane|nucleus|nucleus|	skeletal system development|in utero embryonic development|liver development|myeloid progenitor cell differentiation|transcription, DNA-templated|central nervous system development|regulation of signal transduction|hemopoiesis|hemopoiesis|myeloid cell differentiation|negative regulation of granulocyte differentiation|positive regulation of granulocyte differentiation|hair follicle morphogenesis|e…	regulatory region DNA binding|DNA binding|sequence-specific DNA binding transcription factor activity|sequence-specific DNA binding transcription factor activity|calcium ion binding|protein binding|ATP binding|transcription factor binding|protein homodimerization activity|protein heterodimerization activity|repressing transcription factor binding|	9	7.52	39.8	10	7.25	42	7.35	81.4	1e-06	5.88	9.73	1
ENSG00000110906	KCTD10	potassium channel tetramerization domain containing 10	nucleus|cytoplasm|Cul3-RING ubiquitin ligase complex|TCTN-B9D complex|	protein ubiquitination|protein ubiquitination|proteasome-mediated ubiquitin-dependent protein catabolic process|protein homooligomerization|	ubiquitin-protein transferase activity|	7	9.02	28.5	7	9.74	50.8	9.58	78.8	1e-06	7.26	14.1	1
ENSG00000117308	GALE	UDP-galactose-4-epimerase	cytosol|extracellular vesicular exosome|	carbohydrate metabolic process|galactose catabolic process|galactose catabolic process|cellular metabolic process|small molecule metabolic process|	UDP-glucose 4-epimerase activity|UDP-glucose 4-epimerase activity|protein homodimerization activity|coenzyme binding|	10	4.96	27.3	10	6.82	51.2	6.44	76.3	1e-06	4.65	8.58	1
ENSG00000134107	BHLHE40	basic helix-loop-helix family, member e40	nucleus|nucleus|nucleolus|Golgi apparatus|	negative regulation of transcription from RNA polymerase II promoter|regulation of transcription, DNA-templated|transcription from RNA polymerase II promoter|transcription from RNA polymerase II promoter|transcription from RNA polymerase II promoter|circadian regulation of gene expression|entrainment of circadian clock by photoperiod|negative regulation of sequence-specific DNA binding transcript…	sequence-specific DNA binding RNA polymerase II transcription factor activity|RNA polymerase II core promoter proximal region sequence-specific DNA binding transcription factor activity involved in negative regulation of transcription|RNA polymerase II activating transcription factor binding|RNA polymerase II transcription factor binding transcription factor activity involved in negative regulati…	10	5.81	38.5	10	5.89	37.3	5.86	75.4	1e-06	4.48	7.93	1
ENSG00000004455	AK2	adenylate kinase 2	mitochondrial inner membrane|mitochondrial intermembrane space|cytosol|extracellular vesicular exosome|sperm mitochondrial sheath|	liver development|oxidative phosphorylation|ADP biosynthetic process|brain development|nucleobase-containing small molecule interconversion|small molecule metabolic process|AMP metabolic process|dATP metabolic process|nucleotide phosphorylation|nucleotide phosphorylation|nucleobase-containing small molecule metabolic process|response to thyroid hormone|	adenylate kinase activity|ATP binding|	10	7.16	34.9	10	6.81	39.6	7.07	74.1	1e-06	5.13	10	1
ENSG00000106462	EZH2	enhancer of zeste 2 polycomb repressive complex 2 subunit	nuclear chromatin|nucleus|nucleoplasm|cytoplasm|ESC/E(Z) complex|pronucleus|	negative regulation of transcription from RNA polymerase II promoter|chromatin organization|transcription, DNA-templated|regulation of transcription, DNA-templated|positive regulation of epithelial to mesenchymal transition|regulation of gliogenesis|cerebellar cortex development|positive regulation of Ras GTPase activity|negative regulation of transcription elongation from RNA polymerase II promo…	core promoter binding|DNA binding|chromatin binding|RNA binding|protein binding|chromatin DNA binding|histone methyltransferase activity|sequence-specific DNA binding|histone methyltransferase activity (H3-K27 specific)|	9	-2.47	16.2	9	-5.78	61.5	-5.36	73.5	1e-06	-8.22	-3.57	1
ENSG00000177963	RIC8A	RIC8 guanine nucleotide exchange factor A	cytoplasm|plasma membrane|	in utero embryonic development|vasculature development|adenylate cyclase-inhibiting G-protein coupled receptor signaling pathway|visual learning|cell migration involved in gastrulation|positive regulation of GTPase activity|cell-cell adhesion involved in gastrulation|basement membrane organization|	guanyl-nucleotide exchange factor activity|protein binding|	10	-2.32	30	10	-3.82	44.7	-3.12	71.7	1e-06	-5.06	-2.13	1
ENSG00000213593	TMX2	thioredoxin-related transmembrane protein 2	cellular_component|integral component of membrane|	biological_process|cell redox homeostasis|	molecular_function|	8	7.39	36.8	9	6.94	32.7	7.15	69	1e-06	5.37	9.91	1
ENSG00000104412	EMC2	ER membrane protein complex subunit 2	nucleus|cytoplasm|mitochondrion|endoplasmic reticulum|ER membrane protein complex|	None	None	10	7.11	38	10	7.43	31	7.21	68.6	1e-06	5.55	10.3	1
ENSG00000100425	BRD1	bromodomain containing 1	nucleus|nucleus|MOZ/MORF histone acetyltransferase complex|	histone H3 acetylation|	zinc ion binding|histone binding|	10	6.47	33.5	10	5.64	34.9	5.93	67.8	1e-06	4.54	8.18	1
ENSG00000075785	RAB7A	RAB7A, member RAS oncogene family	lysosome|lysosome|lysosomal membrane|late endosome|late endosome|Golgi apparatus|phagocytic vesicle membrane|melanosome|intracellular membrane-bounded organelle|phagocytic vesicle|extracellular vesicular exosome|alveolar lamellar body|	GTP catabolic process|GTP catabolic process|protein targeting to lysosome|endocytosis|epidermal growth factor catabolic process|small GTPase mediated signal transduction|cell death|endosome to lysosome transport|protein transport|antigen processing and presentation of exogenous peptide antigen via MHC class II|early endosome to late endosome transport|bone resorption|phagosome maturation|phagosom…	GTPase activity|protein binding|GTP binding|GDP binding|Rac GTPase binding|	10	5.6	33.7	10	5.93	33.5	5.65	66.6	1e-06	4.32	7.82	1
ENSG00000105619	TFPT	TCF3 (E2A) fusion partner (in childhood Leukemia)	nucleus|nucleus|nucleolus|cytoplasm|actin filament|Ino80 complex|	DNA repair|DNA recombination|transcription, DNA-templated|regulation of transcription, DNA-templated|positive regulation of apoptotic process|apoptotic signaling pathway|	DNA binding|protein binding|protein kinase binding|protein heterodimerization activity|	10	7.24	36.4	10	5.91	29.5	6.33	64.7	1e-06	4.93	8.91	1
ENSG00000095380	NANS	N-acetylneuraminic acid synthase	cytoplasm|cytosol|extracellular vesicular exosome|	lipopolysaccharide biosynthetic process|	N-acylneuraminate cytidylyltransferase activity|N-acylneuraminate-9-phosphate synthase activity|N-acetylneuraminate synthase activity|	10	5.89	29.6	10	6.32	34.9	6.1	64	1e-06	4.55	8.33	1
ENSG00000065526	SPEN	spen family transcriptional repressor	nucleus|transcriptional repressor complex|extracellular vesicular exosome|	negative regulation of transcription from RNA polymerase II promoter|transcription, DNA-templated|Notch signaling pathway|viral process|negative regulation of transcription, DNA-templated|positive regulation of transcription, DNA-templated|positive regulation of neurogenesis|	nucleotide binding|RNA polymerase II transcription factor binding|RNA polymerase II transcription factor binding transcription factor activity involved in negative regulation of transcription|single-stranded DNA binding|sequence-specific DNA binding transcription factor activity|transcription corepressor activity|protein binding|poly(A) RNA binding|	10	7.32	36	10	6.65	28	7.31	63.4	1e-06	5.37	9.79	1
ENSG00000147533	GOLGA7	golgin A7	palmitoyltransferase complex|Golgi stack|intrinsic component of Golgi membrane|extracellular vesicular exosome|	peptidyl-L-cysteine S-palmitoylation|Golgi to plasma membrane protein transport|protein stabilization|	protein binding|	10	5.86	33	10	5.26	30.8	5.35	63.3	1e-06	4.05	7.65	1
ENSG00000114742	WDR48	WD repeat domain 48	nucleus|lysosome|intracellular membrane-bounded organelle|	viral process|protein deubiquitination|	protein binding|	10	7.85	35.2	10	6.66	28.8	6.88	63.3	1e-06	5.25	9.91	1
ENSG00000256206	PSMA1	proteasome (prosome, macropain) subunit, alpha type, 1	proteasome complex|nucleus|nucleoplasm|centrosome|cytosol|proteasome core complex|polysome|proteasome core complex, alpha-subunit complex|extracellular vesicular exosome|	G1/S transition of mitotic cell cycle|protein polyubiquitination|mitotic cell cycle|antigen processing and presentation of peptide antigen via MHC class I|antigen processing and presentation of exogenous peptide antigen via MHC class I, TAP-dependent|regulation of cellular amino acid metabolic process|apoptotic process|DNA damage response, signal transduction by p53 class mediator resulting in ce…	RNA binding|threonine-type endopeptidase activity|protein binding|	7	9.73	31.7	6	6.97	31.9	8.1	62.6	1e-06	5.73	12.6	1
ENSG00000131504	DIAPH1	diaphanous-related formin 1	cytoplasm|ruffle membrane|neuron projection|mitotic spindle|	cytoskeleton organization|sensory perception of sound|regulation of cell shape|actin filament polymerization|positive regulation of cell migration|neuron projection development|regulation of microtubule-based process|protein localization to microtubule|regulation of release of sequestered calcium ion into cytosol|cellular response to histamine|	actin binding|receptor binding|protein binding|profilin binding|Rho GTPase binding|identical protein binding|ion channel binding|poly(A) RNA binding|	8	5.5	25.3	10	6.04	34.2	5.94	59.1	1e-06	4.45	8.27	1
ENSG00000127774	EMC6	ER membrane protein complex subunit 6	integral component of membrane|ER membrane protein complex|	None	None	10	6.81	30.9	10	5.89	25.1	6.57	55.1	1e-06	4.77	9.43	1
ENSG00000108344	PSMD3	proteasome (prosome, macropain) 26S subunit, non-ATPase, 3	proteasome complex|nucleus|nucleoplasm|cytoplasm|cytosol|membrane|proteasome accessory complex|extracellular vesicular exosome|	G1/S transition of mitotic cell cycle|protein polyubiquitination|mitotic cell cycle|antigen processing and presentation of peptide antigen via MHC class I|antigen processing and presentation of exogenous peptide antigen via MHC class I, TAP-dependent|regulation of cellular amino acid metabolic process|apoptotic process|DNA damage response, signal transduction by p53 class mediator resulting in ce…	enzyme regulator activity|	10	5.9	26.2	10	5.67	29.4	5.81	55.1	1e-06	4.39	9.29	1
ENSG00000165699	TSC1	tuberous sclerosis 1	cytoplasm|cytosol|cytosol|actin filament|cell cortex|membrane|lamellipodium|growth cone|TSC1-TSC2 complex|intracellular membrane-bounded organelle|protein complex|	kidney development|neural tube closure|regulation of cell-matrix adhesion|rRNA export from nucleus|regulation of translation|potassium ion transport|cell cycle arrest|cell-matrix adhesion|negative regulation of cell proliferation|insulin receptor signaling pathway|negative regulation of translation|hippocampus development|cerebral cortex development|cell projection organization|negative regulatio…	protein binding|GTPase regulator activity|GTPase activating protein binding|protein N-terminus binding|chaperone binding|	10	5.12	25.3	10	5.02	29.3	5.07	54.2	1e-06	3.73	7.08	1
ENSG00000033867	SLC4A7	solute carrier family 4, sodium bicarbonate cotransporter, member 7	plasma membrane|integral component of membrane|basolateral plasma membrane|apical plasma membrane|stereocilium|	ion transport|bicarbonate transport|bicarbonate transport|cochlear nucleus development|sodium ion transmembrane transport|retinal cell programmed cell death|transmembrane transport|auditory receptor cell development|retina vasculature morphogenesis in camera-type eye|	inorganic anion exchanger activity|sodium:bicarbonate symporter activity|	10	6.02	18.1	10	6.13	35.9	6.02	53.6	1e-06	4.35	8.38	1
ENSG00000108960	MMD	monocyte to macrophage differentiation-associated	lysosomal membrane|integral component of plasma membrane|membrane|late endosome membrane|	cytolysis|	receptor activity|	10	5.51	26.5	10	5.33	24.3	5.45	50.4	1e-06	3.94	7.5	1
ENSG00000160695	VPS11	vacuolar protein sorting 11 homolog (S. cerevisiae)	lysosomal membrane|endosome|endocytic vesicle|HOPS complex|late endosome membrane|	intracellular protein transport|vesicle-mediated transport|	nucleotide binding|protein binding|zinc ion binding|	9	5.03	20.2	9	5.8	30.7	5.62	50.2	1e-06	3.92	7.94	1
ENSG00000120063	GNA13	guanine nucleotide binding protein (G protein), alpha 13	nucleus|heterotrimeric G-protein complex|plasma membrane|membrane|brush border membrane|melanosome|extracellular vesicular exosome|	patterning of blood vessels|in utero embryonic development|GTP catabolic process|cellular component movement|signal transduction|adenylate cyclase-activating G-protein coupled receptor signaling pathway|positive regulation of cytosolic calcium ion concentration|Rho protein signal transduction|blood coagulation|regulation of cell shape|cell differentiation|platelet activation|regulation of cell mi…	GTPase activity|signal transducer activity|protein binding|GTP binding|G-protein beta/gamma-subunit complex binding|type 1 angiotensin receptor binding|D5 dopamine receptor binding|metal ion binding|	10	-2.46	21.5	10	-3.12	29.3	-2.81	50	1e-06	-4.5	-1.89	1
ENSG00000115602	IL1RL1	interleukin 1 receptor-like 1	extracellular region|external side of plasma membrane|integral component of membrane|	negative regulation of T-helper 1 type immune response|immune response|signal transduction|negative regulation of interferon-gamma production|positive regulation of interleukin-5 production|intracellular signal transduction|interleukin-33-mediated signaling pathway|positive regulation of macrophage activation|negative regulation of I-kappaB kinase/NF-kappaB signaling|positive regulation of inflam…	interleukin-33 binding|interleukin-33 receptor activity|cytokine receptor activity|interleukin-1 receptor activity|receptor signaling protein activity|protein binding|	10	10.9	25.9	10	9.67	23.4	10.7	48.9	1e-06	5.06	17.2	1
ENSG00000169375	SIN3A	SIN3 transcription regulator family member A	kinetochore|nucleus|nucleus|nucleoplasm|transcription factor complex|cytoplasm|Sin3 complex|Sin3 complex|transcriptional repressor complex|intercellular bridge|	negative regulation of transcription from RNA polymerase II promoter|in utero embryonic development|activation of innate immune response|positive regulation of defense response to virus by host|DNA replication|transcription, DNA-templated|protein deacetylation|aging|blood coagulation|response to organonitrogen compound|positive regulation of G2/M transition of mitotic cell cycle|positive regulati…	transcription regulatory region sequence-specific DNA binding|RNA polymerase II activating transcription factor binding|RNA polymerase II repressing transcription factor binding|RNA polymerase II transcription corepressor activity|chromatin binding|sequence-specific DNA binding transcription factor activity|transcription corepressor activity|protein binding|protein complex binding|protein deacety…	10	6.46	29.2	10	5.37	19.3	5.84	47.8	1e-06	4.32	8.5	1
ENSG00000086200	IPO11	importin 11	nucleus|cytoplasm|	ribosomal protein import into nucleus|	Ran GTPase binding|protein transporter activity|	9	6.74	26.9	9	7.17	21.1	7.01	47.5	1e-06	4.81	10.4	1
ENSG00000166887	VPS39	vacuolar protein sorting 39 homolog (S. cerevisiae)	lysosomal membrane|HOPS complex|late endosome membrane|	intracellular protein transport|vesicle-mediated transport|regulation of catalytic activity|	small GTPase regulator activity|	7	6.24	21.6	7	5.7	25.7	6.03	46.9	1e-06	4.07	9.53	1
ENSG00000136938	ANP32B	acidic (leucine-rich) nuclear phosphoprotein 32 family, member B	nucleus|nucleolus|cytoplasm|extracellular vesicular exosome|	nucleosome assembly|activation of cysteine-type endopeptidase activity involved in apoptotic process|negative regulation of cell differentiation|positive regulation of protein export from nucleus|	histone binding|RNA polymerase binding|	9	5.08	27.7	9	4.59	19.3	4.96	46.5	1e-06	3.52	7.57	1
ENSG00000108671	PSMD11	proteasome (prosome, macropain) 26S subunit, non-ATPase, 11	proteasome complex|nucleus|nucleoplasm|cytosol|membrane|proteasome accessory complex|extracellular vesicular exosome|	G1/S transition of mitotic cell cycle|protein polyubiquitination|mitotic cell cycle|antigen processing and presentation of peptide antigen via MHC class I|antigen processing and presentation of exogenous peptide antigen via MHC class I, TAP-dependent|ubiquitin-dependent protein catabolic process|regulation of cellular amino acid metabolic process|apoptotic process|DNA damage response, signal tran…	protein binding|	9	4.09	21.7	8	5.65	26.2	5.04	46.5	1e-06	3.37	7.47	1
ENSG00000164219	PGGT1B	protein geranylgeranyltransferase type I, beta subunit	CAAX-protein geranylgeranyltransferase complex|	positive regulation of cell proliferation|protein geranylgeranylation|response to cytokine|positive regulation of cell cycle|negative regulation of nitric-oxide synthase biosynthetic process|	protein geranylgeranyltransferase activity|CAAX-protein geranylgeranyltransferase activity|zinc ion binding|	10	-2.69	23.1	10	-2.93	23.2	-2.78	45.8	1e-06	-4.57	-1.83	1
ENSG00000198646	NCOA6	nuclear receptor coactivator 6	nucleus|nucleus|nucleoplasm|transcription factor complex|histone methyltransferase complex|intracellular membrane-bounded organelle|	DNA replication|DNA repair|DNA recombination|DNA-templated transcription, initiation|transcription initiation from RNA polymerase II promoter|cellular response to DNA damage stimulus|brain development|heart development|response to hormone|myeloid cell differentiation|intracellular estrogen receptor signaling pathway|glucocorticoid receptor signaling pathway|cellular lipid metabolic process|small …	chromatin binding|transcription coactivator activity|protein binding|enzyme binding|estrogen receptor binding|ligand-dependent nuclear receptor transcription coactivator activity|retinoid X receptor binding|thyroid hormone receptor binding|	10	5.12	25.1	10	4.39	21.3	4.85	45.7	1e-06	3.35	6.88	1
ENSG00000125037	EMC3	ER membrane protein complex subunit 3	integral component of membrane|ER membrane protein complex|	biological_process|	molecular_function|	10	5.39	19.4	10	5.34	25.9	5.35	44.9	1e-06	3.86	8.14	1
ENSG00000113369	ARRDC3	arrestin domain containing 3	endosome|plasma membrane|	temperature homeostasis|negative regulation of heat generation|negative regulation of multicellular organismal metabolic process|positive regulation of ubiquitin-protein transferase activity|fat pad development|positive regulation of adrenergic receptor signaling pathway|negative regulation of locomotion involved in locomotory behavior|	protein binding|beta-3 adrenergic receptor binding|	10	4.64	24.4	10	4.41	20.2	4.63	44.1	2e-06	3.19	7.14	1
ENSG00000113504	SLC12A7	solute carrier family 12 (potassium/chloride transporter), member 7	plasma membrane|integral component of plasma membrane|	transport|ion transport|potassium ion transport|chloride transport|cell volume homeostasis|transmembrane transport|chloride transmembrane transport|chloride transmembrane transport|	potassium:chloride symporter activity|protein kinase binding|	10	6.46	18.3	10	6.15	25.6	6.24	43.5	2e-06	4.41	8.81	1
ENSG00000152484	USP12	ubiquitin specific peptidase 12	cellular_component|	ubiquitin-dependent protein catabolic process|protein deubiquitination|	cysteine-type endopeptidase activity|ubiquitin thiolesterase activity|ubiquitin thiolesterase activity|ubiquitin-specific protease activity|protein binding|	10	12	21.6	10	12.6	22.3	12.4	43.5	2e-06	8.04	22.4	1
ENSG00000103035	PSMD7	proteasome (prosome, macropain) 26S subunit, non-ATPase, 7	proteasome complex|nucleus|nucleoplasm|cytosol|proteasome regulatory particle|membrane|extracellular vesicular exosome|	G1/S transition of mitotic cell cycle|protein polyubiquitination|mitotic cell cycle|antigen processing and presentation of peptide antigen via MHC class I|antigen processing and presentation of exogenous peptide antigen via MHC class I, TAP-dependent|regulation of cellular amino acid metabolic process|apoptotic process|DNA damage response, signal transduction by p53 class mediator resulting in ce…	protein binding|	10	5.88	17.7	10	5.7	25.4	5.75	42.7	2e-06	4.07	8.32	1
ENSG00000161057	PSMC2	proteasome (prosome, macropain) 26S subunit, ATPase, 2	proteasome complex|cytoplasmic mRNA processing body|nucleus|nucleoplasm|cytoplasm|cytosol|membrane|proteasome accessory complex|	G1/S transition of mitotic cell cycle|protein polyubiquitination|mitotic cell cycle|osteoblast differentiation|antigen processing and presentation of peptide antigen via MHC class I|antigen processing and presentation of exogenous peptide antigen via MHC class I, TAP-dependent|ATP catabolic process|ubiquitin-dependent protein catabolic process|regulation of cellular amino acid metabolic process|a…	protein binding|ATP binding|ATPase activity|	8	7.38	22.9	8	7.24	19.9	7.37	42.4	2e-06	4.95	10.4	1
ENSG00000205155	PSENEN	presenilin enhancer gamma secretase subunit	endoplasmic reticulum|endoplasmic reticulum membrane|Golgi apparatus|plasma membrane|integral component of plasma membrane|Golgi cisterna membrane|	membrane protein ectodomain proteolysis|Notch signaling pathway|Notch receptor processing|protein processing|membrane protein intracellular domain proteolysis|amyloid precursor protein catabolic process|positive regulation of apoptotic process|positive regulation of catalytic activity|neurotrophin TRK receptor signaling pathway|apoptotic signaling pathway|	protein binding|	10	-2.41	20	10	-2.73	22.4	-2.56	41.9	2e-06	-4.13	-1.62	1
ENSG00000128463	EMC4	ER membrane protein complex subunit 4	integral component of membrane|ER membrane protein complex|	apoptotic process|	None	9	5.56	18.2	9	5.4	23.6	5.49	41.4	2e-06	3.69	7.95	1
ENSG00000104142	VPS18	vacuolar protein sorting 18 homolog (S. cerevisiae)	lysosomal membrane|early endosome|actin filament|HOPS complex|late endosome membrane|	intracellular protein transport|endosome organization|lysosome organization|vesicle-mediated transport|	actin binding|protein binding|metal ion binding|	10	4.53	20.4	10	4.76	21.2	4.64	41.1	2e-06	3.32	7	1
ENSG00000215305	VPS16	vacuolar protein sorting 16 homolog (S. cerevisiae)	lysosomal membrane|early endosome|late endosome|actin filament|axon|HOPS complex|late endosome membrane|neuronal cell body|recycling endosome|	intracellular protein transport|	actin filament binding|	8	5.98	21	8	5.78	20.3	5.92	40.9	2e-06	4.16	8.66	1
ENSG00000166266	CUL5	cullin 5	nucleus|cytosol|plasma membrane|Cul5-RING ubiquitin ligase complex|	G1/S transition of mitotic cell cycle|ubiquitin-dependent protein catabolic process|response to osmotic stress|cell cycle arrest|cell proliferation|negative regulation of cell proliferation|viral process|protein ubiquitination|cytosolic calcium ion homeostasis|calcium ion transmembrane transport|intrinsic apoptotic signaling pathway|	receptor activity|calcium channel activity|protein binding|ubiquitin protein ligase binding|	10	-2.22	18.5	10	-2.68	22.8	-2.45	40.7	3e-06	-3.99	-1.53	1
ENSG00000177479	ARIH2	ariadne RBR E3 ubiquitin protein ligase 2	nucleus|cytoplasm|	protein polyubiquitination|multicellular organismal development|protein ubiquitination involved in ubiquitin-dependent protein catabolic process|developmental cell growth|protein K63-linked ubiquitination|protein K48-linked ubiquitination|hematopoietic stem cell proliferation|	nucleic acid binding|ubiquitin-protein transferase activity|protein binding|zinc ion binding|ligase activity|	10	-2.15	17.9	10	-2.77	23.5	-2.55	40.7	3e-06	-4.06	-1.56	1
ENSG00000169710	FASN	fatty acid synthase	cytoplasm|mitochondrion|Golgi apparatus|cytosol|plasma membrane|membrane|melanosome|glycogen granule|extracellular vesicular exosome|	osteoblast differentiation|acetyl-CoA metabolic process|energy reserve metabolic process|fatty acid metabolic process|fatty acid biosynthetic process|vitamin metabolic process|water-soluble vitamin metabolic process|pantothenate metabolic process|triglyceride biosynthetic process|positive regulation of cellular metabolic process|long-chain fatty-acyl-CoA biosynthetic process|cellular lipid metabo…	fatty acid synthase activity|[acyl-carrier-protein] S-acetyltransferase activity|[acyl-carrier-protein] S-malonyltransferase activity|3-oxoacyl-[acyl-carrier-protein] synthase activity|3-oxoacyl-[acyl-carrier-protein] reductase (NADPH) activity|3-hydroxypalmitoyl-[acyl-carrier-protein] dehydratase activity|enoyl-[acyl-carrier-protein] reductase (NADPH, B-specific) activity|oleoyl-[acyl-carrier-pr…	10	-2.81	20.7	10	-2.66	19.3	-2.72	39.5	3e-06	-4.55	-1.68	1
ENSG00000171456	ASXL1	additional sex combs like transcriptional regulator 1	nuclear chromatin|PR-DUB complex|extracellular vesicular exosome|	negative regulation of transcription from RNA polymerase II promoter|transcription, DNA-templated|response to retinoic acid|negative regulation of peroxisome proliferator activated receptor signaling pathway|monoubiquitinated histone H2A deubiquitination|negative regulation of fat cell differentiation|positive regulation of transcription from RNA polymerase II promoter|positive regulation of reti…	DNA binding|transcription coactivator activity|transcription corepressor activity|protein binding|retinoic acid receptor binding|peroxisome proliferator activated receptor binding|metal ion binding|	10	4.78	21.5	10	4.18	18.3	4.52	39.1	4e-06	2.94	6.5	1
ENSG00000111596	CNOT2	CCR4-NOT transcription complex, subunit 2	nucleus|cytoplasm|cytosol|membrane|CCR4-NOT complex|	negative regulation of transcription from RNA polymerase II promoter|nuclear-transcribed mRNA catabolic process, deadenylation-dependent decay|nuclear-transcribed mRNA poly(A) tail shortening|trophectodermal cell differentiation|regulation of transcription from RNA polymerase II promoter|transcription from RNA polymerase II promoter|regulation of translation|gene expression|positive regulation of…	RNA polymerase II transcription cofactor activity|RNA polymerase II transcription corepressor binding|poly(A)-specific ribonuclease activity|protein binding|	10	4.48	19.5	10	5.93	20.5	5.03	39	5e-06	3.39	7.53	1
ENSG00000217128	FNIP1	folliculin interacting protein 1	cytoplasm|	negative regulation of transcription from RNA polymerase II promoter|regulation of protein phosphorylation|positive regulation of protein phosphorylation|immature B cell differentiation|positive regulation of B cell apoptotic process|cellular response to starvation|TOR signaling|negative regulation of TOR signaling|positive regulation of peptidyl-serine phosphorylation|negative regulation of cyst…	guanyl-nucleotide exchange factor activity|protein binding|	10	5.21	16.8	10	5.38	22.4	5.21	38.8	5e-06	3.23	7.54	1
ENSG00000105875	WDR91	WD repeat domain 91	None	None	None	10	5.56	21	10	4.83	18.1	5.27	38.6	6e-06	3.69	7.65	1
ENSG00000167716	WDR81	WD repeat domain 81	None	metabolic process|negative regulation of phosphatase activity|	transferase activity, transferring phosphorus-containing groups|	9	4.63	14.9	9	4.66	23.8	4.63	38.3	6e-06	3.19	7.4	1
ENSG00000211460	TSN	translin	nucleus|cytoplasm|	DNA recombination|nucleic acid phosphodiester bond hydrolysis|	DNA binding|mRNA binding|endonuclease activity|protein binding|protein complex binding|sequence-specific DNA binding|	8	13.9	19.3	8	14.3	19.3	14	38.2	6e-06	11.4	26.8	1
ENSG00000139645	ANKRD52	ankyrin repeat domain 52	None	None	protein binding|	9	5.08	19.2	9	4.3	19.3	4.31	38.1	6e-06	3.05	6.8	1
ENSG00000162702	ZNF281	zinc finger protein 281	nucleus|	transcription, DNA-templated|embryonic body morphogenesis|negative regulation of gene expression|negative regulation of gene expression|negative regulation of transcription, DNA-templated|negative regulation of transcription, DNA-templated|positive regulation of transcription, DNA-templated|stem cell differentiation|	core promoter binding|sequence-specific DNA binding transcription factor activity|transcription corepressor activity|protein binding|sequence-specific DNA binding|transcription regulatory region DNA binding|metal ion binding|	10	4.99	20	10	4.71	18.5	4.89	38	6e-06	3.42	7.22	1
ENSG00000185813	PCYT2	phosphate cytidylyltransferase 2, ethanolamine	cellular_component|endoplasmic reticulum membrane|	phospholipid metabolic process|phosphatidylethanolamine biosynthetic process|phosphatidylethanolamine biosynthetic process|phospholipid biosynthetic process|small molecule metabolic process|glycerophospholipid biosynthetic process|	ethanolamine-phosphate cytidylyltransferase activity|	10	5.45	15.9	10	6.07	22.4	5.87	37.6	6e-06	4.15	8.57	1
ENSG00000102100	SLC35A2	solute carrier family 35 (UDP-galactose transporter), member A2	Golgi membrane|nucleus|Golgi apparatus|integral component of membrane|	galactose metabolic process|UDP-galactose transport|proton transport|transmembrane transport|UDP-galactose transmembrane transport|	sugar:proton symporter activity|UDP-galactose transmembrane transporter activity|protein binding|	10	3.43	11.3	10	5.14	28.1	4.59	37.5	6e-06	3.04	6.67	1
ENSG00000185305	ARL15	ADP-ribosylation factor-like 15	intracellular|extracellular vesicular exosome|	small GTPase mediated signal transduction|biological_process|	molecular_function|GTP binding|	10	4.38	17.2	10	4.46	20.5	4.42	37.3	6e-06	3	6.59	1
ENSG00000100567	PSMA3	proteasome (prosome, macropain) subunit, alpha type, 3	proteasome complex|nucleus|nucleus|nucleoplasm|cytoplasm|cytosol|proteasome core complex|proteasome core complex, alpha-subunit complex|extracellular vesicular exosome|	G1/S transition of mitotic cell cycle|protein polyubiquitination|mitotic cell cycle|antigen processing and presentation of peptide antigen via MHC class I|antigen processing and presentation of exogenous peptide antigen via MHC class I, TAP-dependent|regulation of cellular amino acid metabolic process|apoptotic process|DNA damage response, signal transduction by p53 class mediator resulting in ce…	threonine-type endopeptidase activity|protein binding|	7	7.38	23.3	6	6.97	14.2	7.09	37	7e-06	4.67	11	1
ENSG00000159921	GNE	glucosamine (UDP-N-acetyl)-2-epimerase/N-acetylmannosamine kinase	cytoplasm|cytosol|	N-acetylglucosamine biosynthetic process|UDP-N-acetylglucosamine metabolic process|N-acetylneuraminate metabolic process|cell adhesion|lipopolysaccharide biosynthetic process|N-acetylneuraminate biosynthetic process|carbohydrate phosphorylation|carbohydrate phosphorylation|	ATP binding|UDP-N-acetylglucosamine 2-epimerase activity|N-acylmannosamine kinase activity|hydrolase activity|metal ion binding|	5	6.16	14.1	8	6.34	23.3	6.31	37	7e-06	4	9.83	1
ENSG00000136930	PSMB7	proteasome (prosome, macropain) subunit, beta type, 7	proteasome complex|nucleus|nucleoplasm|cytosol|proteasome core complex|microtubule cytoskeleton|extracellular vesicular exosome|	G1/S transition of mitotic cell cycle|protein polyubiquitination|mitotic cell cycle|antigen processing and presentation of peptide antigen via MHC class I|antigen processing and presentation of exogenous peptide antigen via MHC class I, TAP-dependent|regulation of cellular amino acid metabolic process|apoptotic process|DNA damage response, signal transduction by p53 class mediator resulting in ce…	threonine-type endopeptidase activity|protein binding|	8	4.39	16.9	9	4.35	20.2	4.39	36.8	7e-06	3	6.93	1
ENSG00000163848	ZNF148	zinc finger protein 148	nucleus|	negative regulation of transcription from RNA polymerase II promoter|transcription from RNA polymerase II promoter|protein complex assembly|cellular defense response|gamete generation|negative regulation of gene expression|substantia nigra development|negative regulation of transcription, DNA-templated|positive regulation of transcription from RNA polymerase II promoter|	transcription regulatory region sequence-specific DNA binding|double-stranded DNA binding|sequence-specific DNA binding transcription factor activity|protein binding|sequence-specific DNA binding|metal ion binding|	9	5.05	14.6	9	4.74	22.5	4.81	36.7	7e-06	3.17	7.14	1
ENSG00000142507	PSMB6	proteasome (prosome, macropain) subunit, beta type, 6	nucleus|nucleoplasm|cytosol|proteasome core complex|extracellular vesicular exosome|	G1/S transition of mitotic cell cycle|protein polyubiquitination|mitotic cell cycle|antigen processing and presentation of peptide antigen via MHC class I|antigen processing and presentation of exogenous peptide antigen via MHC class I, TAP-dependent|regulation of cellular amino acid metabolic process|apoptotic process|DNA damage response, signal transduction by p53 class mediator resulting in ce…	endopeptidase activity|threonine-type endopeptidase activity|	7	10	19.2	7	7.52	17.8	8.38	36.1	8e-06	4.18	13.2	1
ENSG00000256861	RP11-512M8.5	N/A	None	None	None	10	3.52	12.3	10	4.51	24.1	4.34	35.7	8e-06	2.83	6.26	1
ENSG00000197170	PSMD12	proteasome (prosome, macropain) 26S subunit, non-ATPase, 12	nucleoplasm|cytosol|proteasome regulatory particle|membrane|proteasome accessory complex|extracellular vesicular exosome|	G1/S transition of mitotic cell cycle|protein polyubiquitination|mitotic cell cycle|antigen processing and presentation of peptide antigen via MHC class I|antigen processing and presentation of exogenous peptide antigen via MHC class I, TAP-dependent|regulation of cellular amino acid metabolic process|apoptotic process|DNA damage response, signal transduction by p53 class mediator resulting in ce…	None	10	4.03	7.99	9	5.74	28.8	5.28	35.6	8e-06	3.27	7.88	1
ENSG00000052802	MSMO1	methylsterol monooxygenase 1	endoplasmic reticulum|endoplasmic reticulum membrane|plasma membrane|integral component of membrane|	fatty acid metabolic process|fatty acid biosynthetic process|cholesterol biosynthetic process|steroid metabolic process|small molecule metabolic process|oxidation-reduction process|	C-4 methylsterol oxidase activity|iron ion binding|	10	4.52	19	10	4.4	16.9	4.49	35.5	8e-06	2.71	8.19	1
ENSG00000173598	NUDT4	nudix (nucleoside diphosphate linked moiety X)-type motif 4	intracellular|cytosol|	cyclic nucleotide metabolic process|calcium-mediated signaling|cyclic-nucleotide-mediated signaling|intracellular signal transduction|inositol phosphate metabolic process|small molecule metabolic process|regulation of RNA export from nucleus|intracellular transport|	diphosphoinositol-polyphosphate diphosphatase activity|snoRNA binding|metal ion binding|inositol diphosphate tetrakisphosphate diphosphatase activity|inositol-1-diphosphate-2,3,4,5,6-pentakisphosphate diphosphatase activity|inositol-3-diphosphate-1,2,4,5,6-pentakisphosphate diphosphatase activity|inositol-5-diphosphate-1,2,3,4,6-pentakisphosphate diphosphatase activity|inositol-1,5-bisdiphosphate…	9	4.72	17.3	10	4.35	18.5	4.47	35.2	8e-06	2.95	6.59	1
ENSG00000110079	MS4A4A	membrane-spanning 4-domains, subfamily A, member 4A	integral component of membrane|	None	None	10	9.57	12.3	10	10.1	22.7	9.71	34.5	9e-06	4.65	15.9	1
ENSG00000087191	PSMC5	proteasome (prosome, macropain) 26S subunit, ATPase, 5	proteasome complex|nucleus|nucleoplasm|cytoplasm|cytosol|membrane|inclusion body|proteasome accessory complex|cytoplasmic vesicle|nuclear proteasome complex|cytosolic proteasome complex|extracellular vesicular exosome|blood microparticle|	G1/S transition of mitotic cell cycle|protein polyubiquitination|mitotic cell cycle|antigen processing and presentation of peptide antigen via MHC class I|antigen processing and presentation of exogenous peptide antigen via MHC class I, TAP-dependent|ATP catabolic process|transcription from RNA polymerase II promoter|regulation of cellular amino acid metabolic process|apoptotic process|DNA damage…	transcription cofactor activity|protein binding|ATP binding|transcription factor binding|ATPase activity|ATPase activity|TBP-class protein binding|thyrotropin-releasing hormone receptor binding|	7	5.05	11.9	9	7.01	23	5.6	33.9	9e-06	3.7	9.46	1
ENSG00000099331	MYO9B	myosin IXB	ruffle|cytoplasm|cytosol|cell cortex|actin cytoskeleton|membrane|myosin complex|lamellipodium|filamentous actin|filopodium tip|perinuclear region of cytoplasm|	monocyte chemotaxis|ATP catabolic process|small GTPase mediated signal transduction|Rho protein signal transduction|establishment of cell polarity|actin filament-based movement|positive regulation of Rho GTPase activity|macrophage chemotaxis|regulation of small GTPase mediated signal transduction|lamellipodium morphogenesis|	microfilament motor activity|actin binding|Rho GTPase activator activity|protein binding|calmodulin binding|ATP binding|zinc ion binding|ATPase activity|actin-dependent ATPase activity|ATP-dependent protein binding|ADP binding|actin filament binding|	9	4.55	13.9	9	5.02	20.3	4.87	33.7	9e-06	3.2	7.61	1
ENSG00000108039	XPNPEP1	X-prolyl aminopeptidase (aminopeptidase P) 1, soluble	cytoplasm|cytoplasm|cytosol|extracellular vesicular exosome|	proteolysis|bradykinin catabolic process|	aminopeptidase activity|manganese ion binding|protein homodimerization activity|metalloaminopeptidase activity|	10	5.01	16.9	10	4.44	17.1	4.74	33.5	9e-06	2.97	6.98	1
ENSG00000188223	AC002398.9	N/A	None	None	None	10	-2.46	18.5	10	-2.63	15.1	-2.55	33.3	9e-06	-4.26	-1.48	1
ENSG00000182858	ALG12	ALG12, alpha-1,6-mannosyltransferase	endoplasmic reticulum|endoplasmic reticulum membrane|membrane|integral component of membrane|	protein folding|protein N-linked glycosylation|dolichol-linked oligosaccharide biosynthetic process|dolichol-linked oligosaccharide biosynthetic process|protein N-linked glycosylation via asparagine|post-translational protein modification|cellular protein metabolic process|mannosylation|mannosylation|	alpha-1,6-mannosyltransferase activity|dol-P-Man:Man(7)GlcNAc(2)-PP-Dol alpha-1,6-mannosyltransferase activity|	10	-1.48	7.14	10	-3.11	29	-2.58	33.2	9e-06	-4.63	-1.47	1
ENSG00000100888	CHD8	chromodomain helicase DNA binding protein 8	nucleus|protein complex|MLL1 complex|	in utero embryonic development|ATP catabolic process|transcription, DNA-templated|negative regulation of Wnt signaling pathway|DNA duplex unwinding|ATP-dependent chromatin remodeling|negative regulation of transcription, DNA-templated|positive regulation of transcription, DNA-templated|positive regulation of transcription from RNA polymerase II promoter|positive regulation of transcription from R…	p53 binding|DNA binding|DNA helicase activity|protein binding|ATP binding|beta-catenin binding|DNA-dependent ATPase activity|methylated histone binding|histone binding|armadillo repeat domain binding|	10	3.6	13.5	10	4.21	20.4	3.99	33.2	9e-06	2.54	6.23	1
ENSG00000189362	TMEM194B	transmembrane protein 194B	integral component of membrane|	None	None	10	9.45	12	10	9.98	21.5	9.62	33.1	9e-06	6.25	17.2	1
ENSG00000056097	ZFR	zinc finger RNA binding protein	nucleus|chromosome|cytoplasm|	multicellular organismal development|	DNA binding|protein binding|zinc ion binding|poly(A) RNA binding|	10	5.21	21.8	10	3.49	11.9	5.03	32.9	9e-06	3.14	7.56	1
ENSG00000171316	CHD7	chromodomain helicase DNA binding protein 7	nucleus|nucleus|	skeletal system development|in utero embryonic development|heart morphogenesis|transcription, DNA-templated|regulation of transcription, DNA-templated|rRNA processing|central nervous system development|adult heart development|sensory perception of sound|adult walking behavior|blood circulation|chromatin modification|cranial nerve development|T cell differentiation|female genitalia development|emb…	DNA binding|chromatin binding|helicase activity|protein binding|ATP binding|	10	-2.09	19.5	10	-1.84	13.7	-1.98	32.7	9e-06	-3.38	-1.19	1
ENSG00000171940	ZNF217	zinc finger protein 217	histone deacetylase complex|nucleoplasm|	transcription, DNA-templated|regulation of transcription, DNA-templated|negative regulation of transcription, DNA-templated|	sequence-specific DNA binding transcription factor activity|protein binding|transcription regulatory region DNA binding|metal ion binding|	10	5.69	17.2	10	4.98	15.2	5.06	31.9	1.1e-05	3.22	7.87	1
ENSG00000115841	RMDN2	regulator of microtubule dynamics 2	spindle pole|cytoplasm|mitochondrion|microtubule|integral component of membrane|	None	None	9	6.46	13.4	9	8.02	18.6	6.46	31.2	1.1e-05	4.27	11.1	1
ENSG00000169554	ZEB2	zinc finger E-box binding homeobox 2	nucleus|	negative regulation of transcription from RNA polymerase II promoter|neural crest cell migration|somitogenesis|neural tube closure|transcription, DNA-templated|nervous system development|hippocampus development|cell proliferation in forebrain|positive regulation of Wnt signaling pathway|positive regulation of JUN kinase activity|positive regulation of melanocyte differentiation|positive regulatio…	sequence-specific DNA binding transcription factor activity|phosphatase regulator activity|sequence-specific DNA binding|metal ion binding|R-SMAD binding|	10	4.54	18.6	10	3.84	13.1	4.34	31.1	1.1e-05	2.76	7.44	1
ENSG00000139719	VPS33A	vacuolar protein sorting 33 homolog A (S. cerevisiae)	lysosomal membrane|early endosome|late endosome|HOPS complex|late endosome membrane|perinuclear region of cytoplasm|	vesicle docking involved in exocytosis|protein transport|vesicle-mediated transport|platelet formation|melanosome localization|lysosome localization|regulation of developmental pigmentation|	protein binding|	10	3.45	11.3	10	4.48	19.9	4.32	30.5	1.2e-05	2.69	6.3	1
ENSG00000152223	EPG5	ectopic P-granules autophagy protein 5 homolog (C. elegans)	None	autophagy|	None	10	3.57	11.6	10	4.59	19.5	4.22	30.2	1.5e-05	2.64	6.45	1
ENSG00000167522	ANKRD11	ankyrin repeat domain 11	nucleus|cytoplasm|plasma membrane|	in utero embryonic development|tissue homeostasis|multicellular organism growth|odontogenesis of dentin-containing tooth|skeletal system morphogenesis|face morphogenesis|bone development|	None	10	5.07	14.3	10	4.76	15.9	5.02	29.7	1.6e-05	3.26	7.24	1
ENSG00000006715	VPS41	vacuolar protein sorting 41 homolog (S. cerevisiae)	lysosomal membrane|early endosome|late endosome|Golgi-associated vesicle|cytosol|microtubule|membrane|HOPS complex|	intracellular protein transport|biological_process|vesicle-mediated transport|Golgi vesicle transport|	molecular_function|protein binding|microtubule binding|zinc ion binding|	10	4.4	17.2	10	4.34	12.5	4.37	29.3	1.8e-05	2.68	6.85	1
ENSG00000180957	PITPNB	phosphatidylinositol transfer protein, beta	Golgi membrane|endoplasmic reticulum membrane|extracellular vesicular exosome|	in utero embryonic development|lipid metabolic process|phospholipid metabolic process|phospholipid transport|small molecule metabolic process|glycerophospholipid biosynthetic process|	lipid binding|	10	5.15	16	10	4.18	13.9	4.58	29.3	1.8e-05	2.82	6.95	1
ENSG00000138018	EPT1	ethanolaminephosphotransferase 1 (CDP-ethanolamine-specific)	endoplasmic reticulum membrane|integral component of membrane|	phospholipid metabolic process|phosphatidylethanolamine biosynthetic process|phosphatidylethanolamine biosynthetic process|small molecule metabolic process|glycerophospholipid biosynthetic process|	ethanolaminephosphotransferase activity|metal ion binding|	10	5.26	12	10	6.54	17.8	5.43	29.2	1.9e-05	3.12	8.55	1
ENSG00000091262	ABCC6	ATP-binding cassette, sub-family C (CFTR/MRP), member 6	plasma membrane|integral component of membrane|basolateral plasma membrane|apical plasma membrane|lateral plasma membrane|	ATP catabolic process|transport|visual perception|response to drug|transmembrane transport|	transporter activity|ATP binding|ATPase activity, coupled to transmembrane movement of substances|	10	9.09	8.54	10	10.6	21.1	9.49	29.1	1.9e-05	4.18	19	1
ENSG00000166068	SPRED1	sprouty-related, EVH1 domain containing 1	nucleus|cytoplasm|caveola|	inactivation of MAPK activity|multicellular organismal development|negative regulation of peptidyl-threonine phosphorylation|negative regulation of phosphatase activity|positive regulation of DNA damage response, signal transduction by p53 class mediator|regulation of protein deacetylation|	stem cell factor receptor binding|protein binding|protein kinase binding|phosphatase binding|protein serine/threonine kinase inhibitor activity|	8	5.25	15	10	4.62	14	4.78	28.4	2.1e-05	2.84	7.97	1
ENSG00000134153	EMC7	ER membrane protein complex subunit 7	cytoplasm|integral component of membrane|integral component of membrane|ER membrane protein complex|	biological_process|	purine nucleotide binding|carbohydrate binding|	9	5.59	14.3	9	5.19	14.5	5.46	28.4	2.1e-05	3.29	8.29	1
ENSG00000127463	EMC1	ER membrane protein complex subunit 1	integral component of membrane|ER membrane protein complex|	None	None	10	4.25	15.5	10	4.01	13.1	4.21	28.2	2.1e-05	2.69	6.98	1
ENSG00000114125	RNF7	ring finger protein 7	nucleus|nucleus|cytoplasm|cytoplasm|Cul5-RING ubiquitin ligase complex|	intrinsic apoptotic signaling pathway in response to oxidative stress|protein ubiquitination|negative regulation of apoptotic process|protein neddylation|response to redox state|	copper ion binding|protein binding|zinc ion binding|NEDD8 ligase activity|	9	-2.53	14.6	9	-3.44	14.2	-2.95	28	2.1e-05	-5.54	-1.72	1
ENSG00000126903	SLC10A3	solute carrier family 10, member 3	integral component of membrane|	sodium ion transport|bile acid and bile salt transport|response to retinoic acid|transmembrane transport|	bile acid:sodium symporter activity|	10	6.99	16.5	10	5.78	11.8	5.94	27.7	2.1e-05	3.77	9.41	1
ENSG00000113811	SELK	selenoprotein K	endoplasmic reticulum|endoplasmic reticulum membrane|plasma membrane|integral component of membrane|	calcium ion transport|response to oxidative stress|positive regulation of T cell proliferation|respiratory burst after phagocytosis|intrinsic apoptotic signaling pathway in response to endoplasmic reticulum stress|positive regulation of T cell migration|	None	10	6.45	23.2	10	5.92	4.73	6.13	27.5	2.2e-05	3.81	9.44	1
ENSG00000159346	ADIPOR1	adiponectin receptor 1	plasma membrane|membrane|integral component of membrane|	hormone-mediated signaling pathway|fatty acid oxidation|negative regulation of cell growth|leptin-mediated signaling pathway|adiponectin-activated signaling pathway|positive regulation of JAK-STAT cascade|positive regulation of insulin receptor signaling pathway|	receptor activity|protein kinase binding|hormone binding|identical protein binding|protein heterodimerization activity|	9	4.84	12.5	9	4.92	15.3	4.88	27.4	2.3e-05	2.98	7.86	1
ENSG00000155876	RRAGA	Ras-related GTP binding A	nucleus|cytoplasm|lysosome|lysosomal membrane|Golgi apparatus|intracellular membrane-bounded organelle|	apoptotic process|cell death|modulation by virus of host morphology or physiology|positive regulation of TOR signaling|cellular protein localization|positive regulation of cytolysis|cellular response to amino acid stimulus|	protein binding|GTP binding|protein homodimerization activity|protein heterodimerization activity|phosphoprotein binding|	9	4.58	12.1	10	4.67	15.4	4.62	27.1	2.6e-05	2.91	7.04	1
ENSG00000122674	CCZ1	CCZ1 vacuolar protein trafficking and biogenesis associated homolog (S. cerevisiae)	lysosomal membrane|	None	None	10	4.29	11.9	10	5.94	15.8	4.7	27	2.6e-05	3.02	7.72	1
ENSG00000145725	PPIP5K2	diphosphoinositol pentakisphosphate kinase 2	cytosol|cytosol|	inositol metabolic process|phosphorylation|dephosphorylation|inositol phosphate metabolic process|small molecule metabolic process|	inositol-1,3,4,5,6-pentakisphosphate kinase activity|inositol hexakisphosphate 5-kinase activity|acid phosphatase activity|ATP binding|diphosphoinositol-pentakisphosphate kinase activity|inositol hexakisphosphate 1-kinase activity|inositol hexakisphosphate 3-kinase activity|	10	9.41	11.5	10	9.74	15.6	9.54	26.7	2.6e-05	5.99	17.1	1
ENSG00000269846	RBL1	retinoblastoma-like 1	nucleus|nucleoplasm|transcription factor complex|	negative regulation of transcription from RNA polymerase II promoter|mitotic cell cycle|transcription, DNA-templated|transcription initiation from RNA polymerase II promoter|transforming growth factor beta receptor signaling pathway|gene expression|viral process|chromatin modification|regulation of lipid kinase activity|positive regulation of transcription from RNA polymerase II promoter|regulati…	protein binding|transcription factor binding|	10	4.61	14.9	10	3.51	12.1	3.76	26.4	3e-05	2.4	6.37	1
ENSG00000011638	TMEM159	transmembrane protein 159	integral component of membrane|	None	None	10	9.38	19.2	10	5.15	10.6	8.31	26.3	3e-05	3.86	12.8	1
ENSG00000063245	EPN1	epsin 1	nucleus|cytoplasm|plasma membrane|coated pit|	in utero embryonic development|endocytosis|epidermal growth factor receptor signaling pathway|Notch signaling pathway|female pregnancy|negative regulation of epidermal growth factor receptor signaling pathway|embryonic organ development|	transcription factor binding|lipid binding|	10	-0.89	1.77	10	-5.41	28.4	-5.22	26.2	3e-05	-11.1	-1.61	1
ENSG00000137507	LRRC32	leucine rich repeat containing 32	integral component of plasma membrane|	positive regulation of gene expression|negative regulation of activated T cell proliferation|negative regulation of cytokine secretion|	None	10	10.5	9.73	10	10	16.8	10.3	26.1	3.2e-05	6.59	20.4	1
ENSG00000141378	PTRH2	peptidyl-tRNA hydrolase 2	mitochondrion|mitochondrion|cytosol|membrane|	apoptotic process|metabolic process|negative regulation of gene expression|positive regulation of anoikis|negative regulation of anoikis|	aminoacyl-tRNA hydrolase activity|protein binding|	9	4.53	14.6	9	3.48	11.9	4.33	25.9	3.3e-05	2.54	6.59	1
ENSG00000105583	WDR83OS	WD repeat domain 83 opposite strand	integral component of membrane|	None	None	10	3.84	11.5	10	4.06	14.8	3.89	25.9	3.3e-05	2.47	5.93	1
ENSG00000153560	UBP1	upstream binding protein 1 (LBP-1a)	nucleus|	angiogenesis|transcription, DNA-templated|regulation of transcription from RNA polymerase II promoter|viral genome replication|negative regulation of transcription, DNA-templated|	DNA binding|sequence-specific DNA binding transcription factor activity|transcription corepressor activity|	10	4.92	13.9	10	4.4	12.4	4.45	25.8	3.4e-05	2.39	7.9	1
ENSG00000101457	DNTTIP1	deoxynucleotidyltransferase, terminal, interacting protein 1	nucleus|nucleolus|	None	None	10	5.43	14.7	10	4.29	11.5	4.55	25.5	3.7e-05	2.39	7.78	1
ENSG00000188152	NUTM2G	NUT family member 2G	None	None	None	9	4.18	8.2	9	10.3	21.2	4.56	25.4	3.9e-05	1.81	14.3	1
ENSG00000129657	SEC14L1	SEC14-like 1 (S. cerevisiae)	Golgi apparatus|membrane|integral component of membrane|	transport|	None	9	4.46	10.8	10	3.85	14.9	4.12	25.2	4.1e-05	2.58	6.65	1
ENSG00000100387	RBX1	ring-box 1, E3 ubiquitin protein ligase	nucleoplasm|cytosol|cytosol|SCF ubiquitin ligase complex|SCF ubiquitin ligase complex|VCB complex|cullin-RING ubiquitin ligase complex|Cul2-RING ubiquitin ligase complex|Cul3-RING ubiquitin ligase complex|Cul4A-RING E3 ubiquitin ligase complex|Cul4B-RING E3 ubiquitin ligase complex|Cul5-RING ubiquitin ligase complex|Cul7-RING ubiquitin ligase complex|	DNA repair|protein monoubiquitination|Notch signaling pathway|viral process|protein ubiquitination|SCF-dependent proteasomal ubiquitin-dependent protein catabolic process|SCF-dependent proteasomal ubiquitin-dependent protein catabolic process|proteasome-mediated ubiquitin-dependent protein catabolic process|protein neddylation|regulation of transcription from RNA polymerase II promoter in respons…	ubiquitin-protein transferase activity|ubiquitin-protein transferase activity|protein binding|zinc ion binding|NEDD8 ligase activity|ubiquitin protein ligase binding|protein complex binding|	7	4.17	14.4	7	3.99	11.1	4.1	25.1	4.1e-05	2.45	6.89	1
ENSG00000159217	IGF2BP1	insulin-like growth factor 2 mRNA binding protein 1	nucleus|cytoplasm|cytosol|cytoplasmic stress granule|lamellipodium|filopodium|axon|growth cone|ribonucleoprotein complex|dendritic spine|perinuclear region of cytoplasm|CRD-mediated mRNA stability complex|	gene expression|regulation of mRNA stability involved in response to stress|negative regulation of translation|regulation of cytokine biosynthetic process|mRNA transport|CRD-mediated mRNA stabilization|	nucleotide binding|mRNA binding|mRNA 3'-UTR binding|protein binding|poly(A) RNA binding|translation regulator activity|mRNA 5'-UTR binding|	10	3.87	14.9	10	3.57	10.5	3.72	25	4.3e-05	2.21	6.61	1
ENSG00000153944	MSI2	musashi RNA-binding protein 2	cytoplasm|polysome|	stem cell development|	nucleotide binding|poly(U) RNA binding|poly(A) RNA binding|	10	-1.73	10.5	10	-2.61	15.7	-2.24	24.9	4.3e-05	-3.95	-1.14	1
ENSG00000130816	DNMT1	DNA (cytosine-5-)-methyltransferase 1	nucleus|replication fork|centromeric heterochromatin|	negative regulation of transcription from RNA polymerase II promoter|DNA methylation|transcription, DNA-templated|maintenance of DNA methylation|positive regulation of gene expression|gene silencing|chromatin modification|regulation of cell proliferation|positive regulation of histone H3-K4 methylation|negative regulation of histone H3-K9 methylation|cellular response to amino acid stimulus|C-5 m…	DNA binding|chromatin binding|RNA binding|DNA (cytosine-5-)-methyltransferase activity|protein binding|transcription factor binding|zinc ion binding|methyl-CpG binding|DNA-methyltransferase activity|	10	-2.37	9.69	10	-2.94	15.5	-2.75	24.7	4.4e-05	-5.13	-1.46	1
ENSG00000159363	ATP13A2	ATPase type 13A2	lysosome|lysosomal membrane|integral component of membrane|	ATP catabolic process|cation transport|cell death|	protein binding|ATP binding|cation-transporting ATPase activity|metal ion binding|	10	8.76	11.5	10	7.87	13.7	8.08	24.7	4.4e-05	3.53	12.7	1
ENSG00000169180	XPO6	exportin 6	nucleus|nucleus|nucleolus|cytoplasm|cytoplasm|plasma membrane|	protein export from nucleus|	protein binding|Ran GTPase binding|protein transporter activity|	10	4.15	14.7	10	4.08	10.2	4.12	24.6	4.6e-05	2.33	6.32	1
ENSG00000272325	NUDT3	nudix (nucleoside diphosphate linked moiety X)-type motif 3	cytosol|extracellular vesicular exosome|	cell-cell signaling|diadenosine polyphosphate catabolic process|inositol phosphate metabolic process|small molecule metabolic process|diphosphoinositol polyphosphate catabolic process|	magnesium ion binding|diphosphoinositol-polyphosphate diphosphatase activity|inositol diphosphate tetrakisphosphate diphosphatase activity|inositol-1-diphosphate-2,3,4,5,6-pentakisphosphate diphosphatase activity|inositol-3-diphosphate-1,2,4,5,6-pentakisphosphate diphosphatase activity|inositol-5-diphosphate-1,2,3,4,6-pentakisphosphate diphosphatase activity|inositol-1,5-bisdiphosphate-2,3,4,6-te…	9	3.88	13.4	9	3.67	11.5	3.77	24.5	4.6e-05	2.29	5.94	1
ENSG00000132522	GPS2	G protein pathway suppressor 2	nucleus|transcriptional repressor complex|	negative regulation of transcription from RNA polymerase II promoter|inactivation of MAPK activity|cell cycle|JNK cascade|negative regulation of JNK cascade|	transcription corepressor activity|GTPase inhibitor activity|protein binding|	10	3.91	11.8	10	5.16	13.4	4.84	24.4	5e-05	2.63	7.54	1
ENSG00000153015	CWC27	CWC27 spliceosome-associated protein homolog (S. cerevisiae)	catalytic step 2 spliceosome|	mRNA splicing, via spliceosome|protein peptidyl-prolyl isomerization|protein folding|	peptidyl-prolyl cis-trans isomerase activity|	9	5.3	13.4	10	4.74	11.1	4.95	24.1	5.6e-05	2.99	7.75	1
ENSG00000013275	PSMC4	proteasome (prosome, macropain) 26S subunit, ATPase, 4	proteasome complex|nucleus|nucleoplasm|cytoplasm|cytosol|membrane|inclusion body|proteasome accessory complex|cytosolic proteasome complex|	G1/S transition of mitotic cell cycle|protein polyubiquitination|mitotic cell cycle|blastocyst development|antigen processing and presentation of peptide antigen via MHC class I|antigen processing and presentation of exogenous peptide antigen via MHC class I, TAP-dependent|ATP catabolic process|proteolysis|regulation of cellular amino acid metabolic process|apoptotic process|DNA damage response, …	protein binding|ATP binding|ATPase activity|	8	4.77	13.5	9	4.31	10.9	4.4	24	5.6e-05	2.78	7.53	1
ENSG00000102103	PQBP1	polyglutamine binding protein 1	nucleus|cytoplasm|cytoplasmic stress granule|nuclear speck|neuronal ribonucleoprotein granule|	alternative mRNA splicing, via spliceosome|transcription, DNA-templated|regulation of transcription, DNA-templated|neuron projection development|regulation of RNA splicing|	DNA binding|transcription coactivator activity|ribonucleoprotein complex binding|	10	4.16	9.12	10	5.12	15.3	4.29	23.9	5.7e-05	2.58	7.55	1
ENSG00000147140	NONO	non-POU domain containing, octamer-binding	nucleus|nucleus|membrane|nuclear matrix|nuclear speck|paraspeckles|	DNA repair|DNA recombination|transcription, DNA-templated|mRNA processing|circadian rhythm|RNA splicing|regulation of circadian rhythm|negative regulation of transcription, DNA-templated|	nucleotide binding|core promoter binding|protein binding|identical protein binding|poly(A) RNA binding|	10	-1.67	8.67	10	-2.23	15.9	-1.97	23.8	5.7e-05	-3.58	-1.04	1
ENSG00000205670	SMIM11	small integral membrane protein 11	cellular_component|integral component of membrane|	biological_process|	molecular_function|	10	5.6	6.73	10	5.82	17.3	5.81	23.6	6.4e-05	3.67	9.3	1
ENSG00000150867	PIP4K2A	phosphatidylinositol-5-phosphate 4-kinase, type II, alpha	cellular_component|nucleus|cytosol|plasma membrane|	phospholipid metabolic process|phosphatidylinositol biosynthetic process|megakaryocyte development|small molecule metabolic process|phosphatidylinositol phosphorylation|phosphatidylinositol phosphorylation|	ATP binding|1-phosphatidylinositol-4-phosphate 5-kinase activity|1-phosphatidylinositol-5-phosphate 4-kinase activity|	10	-1.55	6.71	10	-2.25	17.8	-1.92	23.6	6.4e-05	-3.54	-1.03	1
ENSG00000127022	CANX	calnexin	endoplasmic reticulum|endoplasmic reticulum lumen|endoplasmic reticulum membrane|ribosome|membrane|axon|dendrite cytoplasm|melanosome|neuronal cell body|dendritic spine|protein complex|extracellular vesicular exosome|integral component of lumenal side of endoplasmic reticulum membrane|	antigen processing and presentation of peptide antigen via MHC class I|protein folding|aging|protein secretion|protein N-linked glycosylation via asparagine|antigen processing and presentation of exogenous peptide antigen via MHC class II|post-translational protein modification|cellular protein metabolic process|synaptic vesicle endocytosis|chaperone-mediated protein folding|clathrin-mediated end…	glycoprotein binding|calcium ion binding|protein binding|apolipoprotein binding|ionotropic glutamate receptor binding|poly(A) RNA binding|unfolded protein binding|	10	-2.33	14.5	10	-2.05	9.48	-2.19	23.5	6.7e-05	-4.13	-1.13	1
ENSG00000147099	HDAC8	histone deacetylase 8	histone deacetylase complex|nuclear chromosome|nucleus|cytoplasm|cytosol|	negative regulation of transcription from RNA polymerase II promoter|mitotic cell cycle|chromatin assembly or disassembly|transcription, DNA-templated|sister chromatid cohesion|chromatin modification|histone H3 deacetylation|histone H4 deacetylation|regulation of cohesin localization to chromatin|	histone deacetylase activity|transcription factor binding|NAD-dependent histone deacetylase activity (H3-K14 specific)|metal ion binding|NAD-dependent histone deacetylase activity (H3-K9 specific)|NAD-dependent histone deacetylase activity (H4-K16 specific)|NAD-dependent histone deacetylase activity (H3-K18 specific)|	10	-2.13	14.3	10	-2.04	9.53	-2.09	23.4	7.2e-05	-3.8	-1.07	1
ENSG00000214160	ALG3	ALG3, alpha-1,3- mannosyltransferase	endoplasmic reticulum membrane|endoplasmic reticulum membrane|integral component of membrane|	protein glycosylation|dolichol-linked oligosaccharide biosynthetic process|protein N-linked glycosylation via asparagine|post-translational protein modification|cellular protein metabolic process|mannosylation|mannosylation|	alpha-1,3-mannosyltransferase activity|dol-P-Man:Man(5)GlcNAc(2)-PP-Dol alpha-1,3-mannosyltransferase activity|	10	-2.03	8.73	10	-2.52	15.3	-2.32	23.4	7.2e-05	-4.39	-1.23	1
ENSG00000164985	PSIP1	PC4 and SFRS1 interacting protein 1	nucleus|nucleoplasm|nucleoplasm|nuclear heterochromatin|cytosol|nuclear periphery|transcriptionally active chromatin|	mRNA 5'-splice site recognition|transcription, DNA-templated|regulation of transcription, DNA-templated|response to oxidative stress|response to heat|viral process|positive regulation of transcription from RNA polymerase II promoter|establishment of integrated proviral latency|	RNA polymerase II transcription coactivator activity|chromatin binding|protein binding|activating transcription factor binding|poly(A) RNA binding|supercoiled DNA binding|	10	-1.45	5.17	10	-2.46	19.4	-2.13	23.2	7.6e-05	-3.96	-1.09	1
ENSG00000152795	HNRNPDL	heterogeneous nuclear ribonucleoprotein D-like	nucleus|spliceosomal complex|cytoplasm|extracellular vesicular exosome|	transcription, DNA-templated|regulation of transcription, DNA-templated|RNA processing|regulation of gene expression|	nucleotide binding|DNA binding|double-stranded DNA binding|single-stranded DNA binding|poly(A) binding|poly(G) binding|poly(A) RNA binding|	10	5.95	12.6	10	5.04	11.1	5.86	23.1	7.9e-05	3.1	9.39	1
ENSG00000167851	CD300A	CD300a molecule	plasma membrane|membrane|integral component of membrane|extracellular vesicular exosome|	immune system process|cell adhesion|signal transduction|negative regulation of B cell proliferation|positive regulation of phosphoprotein phosphatase activity|negative regulation of mast cell activation involved in immune response|negative regulation of mast cell degranulation|negative regulation of MAP kinase activity|negative regulation of fibroblast proliferation|regulation of T cell receptor …	phosphatidylserine binding|protein binding|phosphatidylethanolamine binding|signaling receptor activity|	10	5.42	12	10	5.42	11.4	5.42	23	8e-05	3.56	8.96	1
ENSG00000099341	PSMD8	proteasome (prosome, macropain) 26S subunit, non-ATPase, 8	proteasome complex|nucleus|nucleoplasm|cytosol|proteasome regulatory particle|proteasome accessory complex|extracellular vesicular exosome|	G1/S transition of mitotic cell cycle|protein polyubiquitination|mitotic cell cycle|antigen processing and presentation of peptide antigen via MHC class I|antigen processing and presentation of exogenous peptide antigen via MHC class I, TAP-dependent|regulation of cellular amino acid metabolic process|apoptotic process|DNA damage response, signal transduction by p53 class mediator resulting in ce…	None	9	6.6	11.5	9	5.18	12	5.66	22.8	8.7e-05	3.41	9.29	1
ENSG00000114388	NPRL2	nitrogen permease regulator-like 2 (S. cerevisiae)	None	protein phosphorylation|negative regulation of kinase activity|positive regulation of GTPase activity|	protein kinase activity|GTPase activator activity|protein binding|	10	-2.09	14.4	10	-1.68	8.76	-1.94	22.6	9.3e-05	-3.53	-0.98	1
ENSG00000187772	LIN28B	lin-28 homolog B (C. elegans)	nucleus|cytoplasm|	regulation of transcription, DNA-templated|miRNA catabolic process|pre-miRNA processing|RNA 3'-end processing|	DNA binding|RNA binding|protein binding|zinc ion binding|poly(A) RNA binding|	10	4.04	9.59	10	4.12	13.3	4.05	22.5	9.8e-05	2.4	6.03	1
ENSG00000148356	LRSAM1	leucine rich repeat and sterile alpha motif containing 1	extracellular region|cytoplasm|membrane|	protein polyubiquitination|cell death|protein catabolic process|negative regulation of endocytosis|viral budding|protein autoubiquitination|ubiquitin-dependent endocytosis|	ubiquitin-protein transferase activity|hormone activity|protein binding|zinc ion binding|ligase activity|	10	4.03	12.4	10	3.74	10.5	3.85	22.5	9.8e-05	2.21	6.09	1
ENSG00000080802	CNOT4	CCR4-NOT transcription complex, subunit 4	nucleus|cytosol|CCR4-NOT complex|	nuclear-transcribed mRNA catabolic process, deadenylation-dependent decay|nuclear-transcribed mRNA poly(A) tail shortening|gene expression|RNA metabolic process|mRNA metabolic process|protein autoubiquitination|	nucleotide binding|ubiquitin-protein transferase activity|protein binding|zinc ion binding|ligase activity|poly(A) RNA binding|	10	5.1	10.4	10	4.38	12.4	4.6	22.3	0.000106	2.21	7.63	1
ENSG00000105374	NKG7	natural killer cell granule protein 7	integral component of plasma membrane|	None	None	10	8.16	16.4	10	7.33	6.09	8.03	22	0.00012	4.77	13.2	1
ENSG00000116750	UCHL5	ubiquitin carboxyl-terminal hydrolase L5	proteasome complex|nucleus|cytosol|Ino80 complex|Ino80 complex|	DNA repair|DNA recombination|transcription, DNA-templated|regulation of transcription, DNA-templated|ubiquitin-dependent protein catabolic process|transforming growth factor beta receptor signaling pathway|negative regulation of endopeptidase activity|protein deubiquitination|lateral ventricle development|negative regulation of transforming growth factor beta receptor signaling pathway|midbrain d…	ubiquitin-specific protease activity|endopeptidase inhibitor activity|protein binding|omega peptidase activity|poly(A) RNA binding|proteasome binding|	10	5.01	14.3	10	3.58	8.56	4.59	21.8	0.00013	2.62	7.08	1
ENSG00000135317	SNX14	sorting nexin 14	integral component of membrane|	protein transport|termination of G-protein coupled receptor signaling pathway|	phosphatidylinositol binding|	10	6.49	15.7	10	3.33	8.12	4.86	21.7	0.000133	2.57	8.48	1
ENSG00000017260	ATP2C1	ATPase, Ca++ transporting, type 2C, member 1	Golgi membrane|Golgi membrane|Golgi apparatus|trans-Golgi network|membrane|integral component of membrane|	calcium ion transport|calcium ion transport|manganese ion transport|cellular calcium ion homeostasis|cellular calcium ion homeostasis|signal transduction|metabolic process|epidermis development|calcium-dependent cell-cell adhesion|cellular manganese ion homeostasis|actin cytoskeleton reorganization|Golgi calcium ion homeostasis|Golgi calcium ion transport|ion transmembrane transport|positive regu…	signal transducer activity|calcium-transporting ATPase activity|calcium-transporting ATPase activity|calcium ion binding|ATP binding|ATP binding|manganese-transporting ATPase activity|manganese ion binding|metal ion binding|	10	-2.67	17.5	10	-2.48	4.47	-2.62	21.6	0.000137	-5.25	-1.24	1
ENSG00000083642	PDS5B	PDS5, regulator of cohesion maintenance, homolog B (S. cerevisiae)	chromosome, centromeric region|chromatin|nucleus|nucleus|nucleoplasm|chromosome|cytosol|	mitotic cell cycle|mitotic sister chromatid cohesion|cell proliferation|negative regulation of cell proliferation|regulation of cell proliferation|	DNA binding|protein binding|ATP binding|	10	-1.46	6.87	10	-2.08	15.3	-1.85	21.3	0.000158	-3.45	-0.95	1
ENSG00000139200	PIANP	PILR alpha associated neural protein	integral component of membrane|	None	None	10	4.54	10.3	10	5.12	11.5	4.81	21.2	0.000162	2.89	7.59	1
ENSG00000110660	SLC35F2	solute carrier family 35, member F2	cellular_component|integral component of membrane|	transport|biological_process|	molecular_function|	9	4.59	13.3	9	5.33	8.31	4.67	21.1	0.000165	2.66	8.44	1
ENSG00000197172	MAGEA6	melanoma antigen family A, 6	cellular_component|	biological_process|	molecular_function|protein binding|	10	-1.4	6.95	10	-2.36	15.2	-1.98	21	0.000168	-3.74	-0.97	1
ENSG00000250510	GPR162	G protein-coupled receptor 162	plasma membrane|integral component of membrane|	G-protein coupled receptor signaling pathway|	G-protein coupled receptor activity|	10	9.23	13	9	6.7	8.68	7.64	20.8	0.000181	3.41	13.1	1
ENSG00000139718	SETD1B	SET domain containing 1B	nucleus|chromosome|nuclear speck|histone methyltransferase complex|Set1C/COMPASS complex|	transcription, DNA-templated|regulation of transcription, DNA-templated|histone H3-K4 methylation|	nucleotide binding|RNA binding|protein binding|histone methyltransferase activity (H3-K4 specific)|	10	4.55	10.5	10	4.73	10.7	4.66	20.8	0.000181	2.61	6.94	1
ENSG00000143106	PSMA5	proteasome (prosome, macropain) subunit, alpha type, 5	proteasome complex|nucleus|nucleoplasm|cytoplasm|cytosol|proteasome core complex|proteasome core complex, alpha-subunit complex|extracellular vesicular exosome|	G1/S transition of mitotic cell cycle|protein polyubiquitination|mitotic cell cycle|antigen processing and presentation of peptide antigen via MHC class I|antigen processing and presentation of exogenous peptide antigen via MHC class I, TAP-dependent|regulation of cellular amino acid metabolic process|apoptotic process|DNA damage response, signal transduction by p53 class mediator resulting in ce…	threonine-type endopeptidase activity|protein binding|	7	4.69	10.6	6	4.43	10.5	4.49	20.7	0.000186	2.63	8.39	1
ENSG00000204304	PBX2	pre-B-cell leukemia homeobox 2	nucleus|transcription factor complex|	transcription, DNA-templated|proximal/distal pattern formation|embryonic limb morphogenesis|positive regulation of transcription from RNA polymerase II promoter|	chromatin binding|sequence-specific DNA binding transcription factor activity|transcription factor binding|sequence-specific DNA binding|	7	4.58	12.9	10	3.49	8.71	4.04	20.6	0.000195	2.36	6.88	1
ENSG00000106404	CLDN15	claudin 15	plasma membrane|tight junction|integral component of membrane|	ion transport|calcium-independent cell-cell adhesion|cell junction assembly|cell-cell junction organization|tight junction assembly|	structural molecule activity|identical protein binding|	10	4.75	10.4	10	5	10.6	4.89	20.6	0.000195	2.65	7.61	1
ENSG00000125505	MBOAT7	membrane bound O-acyltransferase domain containing 7	endoplasmic reticulum membrane|membrane|integral component of membrane|	phospholipid metabolic process|ventricular system development|phosphatidylinositol acyl-chain remodeling|small molecule metabolic process|glycerophospholipid biosynthetic process|	protein binding|transferase activity, transferring acyl groups other than amino-acyl groups|	10	6.21	10.8	10	5.2	10.1	5.3	20.4	0.000213	2.85	9.19	1
ENSG00000169813	HNRNPF	heterogeneous nuclear ribonucleoprotein F	nucleus|nucleoplasm|membrane|catalytic step 2 spliceosome|	mRNA splicing, via spliceosome|mRNA splicing, via spliceosome|RNA processing|RNA splicing|gene expression|regulation of RNA splicing|regulation of RNA splicing|	nucleotide binding|RNA binding|single-stranded RNA binding|protein binding|poly(A) RNA binding|	10	4.02	9.66	10	3.89	10.7	3.99	20	0.00025	2.12	6.34	1
ENSG00000255622	PCDHB17	protocadherin beta 17 pseudogene	None	None	None	10	11.9	19.1	10	7.55	2.29	10.9	20	0.00025	5.79	21.9	1
ENSG00000008018	PSMB1	proteasome (prosome, macropain) subunit, beta type, 1	proteasome complex|nucleus|nucleoplasm|cytosol|proteasome core complex|extracellular vesicular exosome|	G1/S transition of mitotic cell cycle|protein polyubiquitination|mitotic cell cycle|antigen processing and presentation of peptide antigen via MHC class I|antigen processing and presentation of exogenous peptide antigen via MHC class I, TAP-dependent|regulation of cellular amino acid metabolic process|apoptotic process|DNA damage response, signal transduction by p53 class mediator resulting in ce…	threonine-type endopeptidase activity|protein binding|	7	5.15	9.2	8	4.51	11.2	4.81	19.9	0.000258	2.56	8.79	1
ENSG00000007944	MYLIP	myosin regulatory light chain interacting protein	intracellular|cytoplasm|cytoskeleton|plasma membrane|extrinsic component of membrane|	cellular component movement|nervous system development|negative regulation of low-density lipoprotein particle clearance|protein ubiquitination|protein destabilization|regulation of low-density lipoprotein particle receptor catabolic process|cholesterol homeostasis|protein ubiquitination involved in ubiquitin-dependent protein catabolic process|positive regulation of protein catabolic process|	ubiquitin-protein transferase activity|protein binding|cytoskeletal protein binding|zinc ion binding|ligase activity|	10	3.02	11.1	10	3.36	9.21	3.34	19.9	0.000258	1.84	5.48	1
ENSG00000140391	TSPAN3	tetraspanin 3	integral component of membrane|extracellular vesicular exosome|	biological_process|	molecular_function|	10	8.23	6.44	10	9.86	14	9.15	19.8	0.000277	4.85	17.9	1
ENSG00000126067	PSMB2	proteasome (prosome, macropain) subunit, beta type, 2	proteasome complex|nucleus|nucleoplasm|cytosol|proteasome core complex|membrane|extracellular vesicular exosome|	G1/S transition of mitotic cell cycle|protein polyubiquitination|mitotic cell cycle|antigen processing and presentation of peptide antigen via MHC class I|antigen processing and presentation of exogenous peptide antigen via MHC class I, TAP-dependent|regulation of cellular amino acid metabolic process|apoptotic process|DNA damage response, signal transduction by p53 class mediator resulting in ce…	threonine-type endopeptidase activity|protein binding|	8	4.21	5.02	8	4.84	15.2	4.46	19.7	0.000284	2.55	7.83	1
ENSG00000186439	TRDN	triadin	cytoplasm|endoplasmic reticulum|plasma membrane|voltage-gated calcium channel complex|junctional sarcoplasmic reticulum membrane|junctional sarcoplasmic reticulum membrane|integral component of membrane|sarcoplasmic reticulum|junctional membrane complex|sarcoplasmic reticulum membrane|sarcoplasmic reticulum lumen|calcium channel complex|	cellular calcium ion homeostasis|muscle contraction|regulation of cell communication by electrical coupling|regulation of release of sequestered calcium ion into cytosol by sarcoplasmic reticulum|response to organic cyclic compound|release of sequestered calcium ion into cytosol by sarcoplasmic reticulum|myotube differentiation|cytoplasmic microtubule organization|ion transmembrane transport|regu…	receptor binding|protein binding|protein binding, bridging|protein homodimerization activity|ion channel binding|	9	6.01	11.9	9	4.68	8.75	5.11	19.7	0.000284	3.16	9.19	1
ENSG00000114933	INO80D	INO80 complex subunit D	nucleus|	DNA repair|DNA recombination|transcription, DNA-templated|regulation of transcription, DNA-templated|	None	10	3.8	12.1	10	3.74	7.96	3.8	19.7	0.000284	2.07	5.87	1
ENSG00000183496	MEX3B	mex-3 RNA binding family member B	cytoplasmic mRNA processing body|nucleus|cytoplasm|	protein phosphorylation|protein autophosphorylation|	calcium ion binding|zinc ion binding|poly(A) RNA binding|	10	4.67	11.9	10	3.96	8.35	4.1	19.7	0.000284	2.3	6.83	1
ENSG00000250317	SMIM20	small integral membrane protein 20	integral component of membrane|	None	None	10	6.48	15.4	10	3.78	5.11	6.11	19.6	0.000299	3.17	10.1	1
ENSG00000067248	DHX29	DEAH (Asp-Glu-Ala-His) box polypeptide 29	mitochondrion|eukaryotic 43S preinitiation complex|	ATP catabolic process|translational initiation|	translation initiation factor activity|ATP binding|ATP-dependent helicase activity|ribosomal small subunit binding|poly(A) RNA binding|	8	5.28	17.5	9	3.18	2.65	5.08	19.5	0.000306	2.77	8.73	1
ENSG00000157350	ST3GAL2	ST3 beta-galactoside alpha-2,3-sialyltransferase 2	Golgi membrane|extracellular region|integral component of Golgi membrane|Golgi cisterna membrane|	carbohydrate metabolic process|amino sugar metabolic process|cellular protein modification process|O-glycan processing|keratan sulfate biosynthetic process|glycosaminoglycan metabolic process|keratan sulfate metabolic process|post-translational protein modification|cellular protein metabolic process|small molecule metabolic process|sialylation|sialylation|	beta-galactoside (CMP) alpha-2,3-sialyltransferase activity|	10	5.88	12.8	9	4.37	7.56	4.9	19.5	0.000306	2.81	8.58	1
ENSG00000187098	MITF	microphthalmia-associated transcription factor	nucleus|protein complex|	regulation of transcription, DNA-templated|transcription from RNA polymerase II promoter|protein complex assembly|osteoclast differentiation|melanocyte differentiation|regulation of cell proliferation|camera-type eye development|canonical Wnt signaling pathway involved in negative regulation of apoptotic process|cell fate commitment|regulation of osteoclast differentiation|positive regulation of …	RNA polymerase II core promoter proximal region sequence-specific DNA binding|RNA polymerase II core promoter proximal region sequence-specific DNA binding transcription factor activity involved in positive regulation of transcription|RNA polymerase II core promoter proximal region sequence-specific DNA binding transcription factor activity involved in positive regulation of transcription|chromat…	10	4.81	11.3	10	4.91	8.5	4.86	19.4	0.000318	2.78	8	1
ENSG00000168282	MGAT2	mannosyl (alpha-1,6-)-glycoprotein beta-1,2-N-acetylglucosaminyltransferase	Golgi membrane|Golgi stack|membrane|integral component of membrane|	protein N-linked glycosylation|oligosaccharide metabolic process|oligosaccharide biosynthetic process|protein N-linked glycosylation via asparagine|post-translational protein modification|cellular protein metabolic process|	alpha-1,6-mannosylglycoprotein 2-beta-N-acetylglucosaminyltransferase activity|carbohydrate binding|	8	3.13	3.08	8	4.08	16.8	3.9	19.4	0.000318	2.12	6.59	1
ENSG00000140350	ANP32A	acidic (leucine-rich) nuclear phosphoprotein 32 family, member A	nucleus|nucleoplasm|cytoplasm|endoplasmic reticulum|perinuclear region of cytoplasm|	transcription, DNA-templated|regulation of transcription, DNA-templated|nucleocytoplasmic transport|nucleocytoplasmic transport|gene expression|RNA metabolic process|mRNA metabolic process|intracellular signal transduction|	protein binding|poly(A) RNA binding|	10	4.63	14.5	10	2.54	7.62	4.08	19.4	0.000318	2.05	6.45	1
ENSG00000186827	TNFRSF4	tumor necrosis factor receptor superfamily, member 4	integral component of plasma membrane|external side of plasma membrane|cell surface|	inflammatory response|immune response|cellular defense response|positive regulation of B cell proliferation|tumor necrosis factor-mediated signaling pathway|T cell proliferation|regulation of apoptotic process|negative regulation of sequence-specific DNA binding transcription factor activity|regulation of protein kinase activity|negative regulation of transcription, DNA-templated|negative regulat…	tumor necrosis factor-activated receptor activity|	10	4.77	10.9	10	4.36	8.81	4.38	19.3	0.000337	1.97	7.78	1
ENSG00000143761	ARF1	ADP-ribosylation factor 1	Golgi membrane|cytosol|plasma membrane|postsynaptic density|sarcomere|cell junction|neuron projection|postsynaptic membrane|perinuclear region of cytoplasm|extracellular vesicular exosome|	regulation of receptor internalization|GTP catabolic process|phospholipid metabolic process|phosphatidylinositol biosynthetic process|cellular copper ion homeostasis|retrograde vesicle-mediated transport, Golgi to ER|post-Golgi vesicle-mediated transport|small GTPase mediated signal transduction|protein transport|viral process|antigen processing and presentation of exogenous peptide antigen via M…	GTPase activity|receptor signaling protein activity|protein binding|GTP binding|poly(A) RNA binding|	10	3.39	12.7	10	4.24	7.11	3.36	19.3	0.000337	1.84	6.03	1
ENSG00000146411	SLC2A12	solute carrier family 2 (facilitated glucose transporter), member 12	plasma membrane|endomembrane system|integral component of membrane|perinuclear region of cytoplasm|	glucose transport|transmembrane transport|	substrate-specific transmembrane transporter activity|	9	9.11	12.4	9	7.18	7.61	7.43	19.2	0.00035	2.85	13.5	1
ENSG00000164032	H2AFZ	H2A histone family, member Z	nucleosome|nucleus|nuclear euchromatin|nuclear heterochromatin|	nucleosome assembly|positive regulation of transcription from RNA polymerase II promoter|cellular response to estradiol stimulus|	RNA polymerase II core promoter proximal region sequence-specific DNA binding|RNA polymerase II core promoter sequence-specific DNA binding|RNA polymerase II distal enhancer sequence-specific DNA binding|protein binding|chromatin DNA binding|nucleosomal DNA binding|protein heterodimerization activity|	10	3.36	7.66	9	4.14	12.1	4.01	19.2	0.00035	2.16	6.33	1
ENSG00000196533	C1ORF186	chromosome 1 open reading frame 186	integral component of membrane|	None	None	9	4.61	11	9	3.91	8.57	4.44	19	0.000389	2.5	8.03	1
ENSG00000196914	ARHGEF12	Rho guanine nucleotide exchange factor (GEF) 12	cytoplasm|cytosol|membrane|extracellular vesicular exosome|	G-protein coupled receptor signaling pathway|small GTPase mediated signal transduction|axon guidance|positive regulation of Rho GTPase activity|termination of G-protein coupled receptor signaling pathway|positive regulation of apoptotic process|neurotrophin TRK receptor signaling pathway|regulation of small GTPase mediated signal transduction|apoptotic signaling pathway|	G-protein coupled receptor binding|Rho guanyl-nucleotide exchange factor activity|GTPase activator activity|protein binding|	10	-1.79	10.9	10	-1.95	8.49	-1.86	19	0.000389	-3.48	-0.88	1
ENSG00000136518	ACTL6A	actin-like 6A	nuclear chromatin|nucleus|nucleoplasm|plasma membrane|SWI/SNF complex|Ino80 complex|NuA4 histone acetyltransferase complex|protein complex|npBAF complex|npBAF complex|	neural retina development|DNA repair|DNA recombination|chromatin organization|chromatin remodeling|chromatin remodeling|transcription, DNA-templated|regulation of transcription from RNA polymerase II promoter|signal transduction|nervous system development|regulation of growth|ATP-dependent chromatin remodeling|histone H4 acetylation|histone H2A acetylation|	RNA polymerase II core promoter proximal region sequence-specific DNA binding|RNA polymerase II distal enhancer sequence-specific DNA binding|chromatin binding|transcription coactivator activity|protein binding|nucleosomal DNA binding|	6	5.5	9.12	6	4.55	10.3	4.64	18.9	0.0004	2.68	9.01	1
ENSG00000188124	OR2AG2	olfactory receptor, family 2, subfamily AG, member 2	plasma membrane|integral component of membrane|	G-protein coupled receptor signaling pathway|detection of chemical stimulus involved in sensory perception of smell|	G-protein coupled receptor activity|olfactory receptor activity|	10	8.26	7.06	10	8.52	12.1	8.39	18.8	0.000415	4.67	15.9	1
ENSG00000211826	TRDJ4	T cell receptor delta joining 4	None	None	None	6	4.52	10.2	6	4.82	8.79	4.82	18.6	0.000451	2.79	8.16	1
ENSG00000101266	CSNK2A1	casein kinase 2, alpha 1 polypeptide	nucleus|cytosol|plasma membrane|Sin3 complex|NuRD complex|PcG protein complex|	mitotic cell cycle|transcription, DNA-templated|regulation of transcription, DNA-templated|protein phosphorylation|signal transduction|axon guidance|positive regulation of cell proliferation|Wnt signaling pathway|positive regulation of Wnt signaling pathway|positive regulation of cell growth|negative regulation of cysteine-type endopeptidase activity involved in apoptotic process|positive regulat…	protein serine/threonine kinase activity|protein serine/threonine kinase activity|protein binding|ATP binding|protein N-terminus binding|Hsp90 protein binding|	10	3.28	9.48	10	3.05	9.51	3.16	18.6	0.000451	1.7	5.03	1
ENSG00000158467	AHCYL2	adenosylhomocysteinase-like 2	None	one-carbon metabolic process|	adenosylhomocysteinase activity|	10	6.88	9.94	10	4.98	9.33	6.39	18.6	0.000451	3.02	10.5	1
ENSG00000160781	PAQR6	progestin and adipoQ receptor family member VI	integral component of membrane|	None	receptor activity|	10	4.89	11.3	10	4.12	8.11	4.76	18.6	0.000451	2.61	7.51	1
ENSG00000205277	MUC12	mucin 12, cell surface associated	Golgi lumen|integral component of plasma membrane|	regulation of cell growth|O-glycan processing|post-translational protein modification|cellular protein metabolic process|	molecular_function|	10	6.01	12.6	10	4.46	6.94	5.37	18.5	0.000475	2.88	8.71	1
ENSG00000249992	TMEM158	transmembrane protein 158 (gene/pseudogene)	integral component of membrane|	None	peptide binding|	9	5.62	7.82	9	5.96	11.2	5.75	18.5	0.000475	3.3	9.69	1
ENSG00000160190	SLC37A1	solute carrier family 37 (glucose-6-phosphate transporter), member 1	membrane|integral component of membrane|	carbohydrate transport|transmembrane transport|	transporter activity|	10	6.49	10.8	10	4.71	8.62	5.9	18.4	0.000493	3.46	9.55	1
ENSG00000100902	PSMA6	proteasome (prosome, macropain) subunit, alpha type, 6	cytoplasmic mRNA processing body|nucleus|nucleoplasm|cytoplasm|cytosol|proteasome core complex|proteasome core complex|polysome|nuclear matrix|proteasome core complex, alpha-subunit complex|proteasome core complex, alpha-subunit complex|myofibril|sarcomere|extracellular vesicular exosome|	G1/S transition of mitotic cell cycle|protein polyubiquitination|mitotic cell cycle|antigen processing and presentation of peptide antigen via MHC class I|antigen processing and presentation of exogenous peptide antigen via MHC class I, TAP-dependent|regulation of cellular amino acid metabolic process|apoptotic process|DNA damage response, signal transduction by p53 class mediator resulting in ce…	RNA binding|RNA binding|endopeptidase activity|threonine-type endopeptidase activity|protein binding|purine ribonucleoside triphosphate binding|NF-kappaB binding|	10	4.82	5.21	8	5.02	13.4	5.01	18.2	0.000547	2.78	8.17	1
ENSG00000174109	C16ORF91	chromosome 16 open reading frame 91	integral component of membrane|	None	None	9	6.07	11.3	9	8.76	7.32	7.74	18.2	0.000547	3.27	13.1	1
ENSG00000118058	KMT2A	lysine (K)-specific methyltransferase 2A	nucleus|nucleus|cytoplasm|histone methyltransferase complex|MLL1 complex|	DNA methylation|transcription from RNA polymerase II promoter|protein complex assembly|apoptotic process|negative regulation of cell proliferation|anterior/posterior pattern specification|positive regulation of transporter activity|embryonic hemopoiesis|histone H4-K16 acetylation|positive regulation of transcription, DNA-templated|positive regulation of transcription from RNA polymerase II promot…	AT DNA binding|chromatin binding|sequence-specific DNA binding transcription factor activity|protein binding|zinc ion binding|histone methyltransferase activity (H3-K4 specific)|histone methyltransferase activity (H3-K4 specific)|identical protein binding|protein homodimerization activity|transcription regulatory region DNA binding|unmethylated CpG binding|lysine-acetylated histone binding|	10	-1.43	5.09	10	-2.05	13.8	-1.86	18.1	0.000573	-3.7	-0.88	1
ENSG00000138041	SMEK2	SMEK homolog 2, suppressor of mek1 (Dictyostelium)	nucleus|cytoplasm|microtubule organizing center|protein phosphatase 4 complex|	protein dephosphorylation|regulation of lipid metabolic process|positive regulation of gluconeogenesis|	None	10	3.07	7.76	10	3.73	10.9	3.25	18.1	0.000573	1.72	5.65	1
ENSG00000205133	TRIQK	triple QxxK/R motif containing	endoplasmic reticulum membrane|integral component of membrane|	None	None	5	9.85	6.75	5	9.73	11.7	9.85	18	0.000603	6.87	18.4	1
ENSG00000086666	ZFAND6	zinc finger, AN1-type domain 6	cellular_component|cytoplasm|	protein targeting to peroxisome|apoptotic process|negative regulation of apoptotic process|regulation of I-kappaB kinase/NF-kappaB signaling|cellular response to tumor necrosis factor|	molecular_function|DNA binding|protein binding|zinc ion binding|polyubiquitin binding|	10	4.09	9.04	10	3.02	9.75	3.58	18	0.000603	1.91	6.65	1
ENSG00000172262	ZNF131	zinc finger protein 131	nucleus|	regulation of transcription, DNA-templated|regulation of transcription from RNA polymerase II promoter|transcription from RNA polymerase II promoter|transcription from RNA polymerase II promoter|	sequence-specific DNA binding RNA polymerase II transcription factor activity|DNA binding|sequence-specific DNA binding transcription factor activity|metal ion binding|	8	1.16	0.394	8	-6.69	21	-6.56	18	0.000603	-14.7	-4.6	1
ENSG00000126003	PLAGL2	pleiomorphic adenoma gene-like 2	nucleus|	transcription, DNA-templated|lipid metabolic process|post-embryonic development|chylomicron assembly|positive regulation of transcription from RNA polymerase II promoter|positive regulation of intrinsic apoptotic signaling pathway|	RNA polymerase II core promoter proximal region sequence-specific DNA binding transcription factor activity involved in positive regulation of transcription|sequence-specific DNA binding transcription factor activity|sequence-specific DNA binding|metal ion binding|	10	3.27	8.94	10	3.01	9.34	3.08	17.9	0.000631	1.65	5.24	1
ENSG00000100804	PSMB5	proteasome (prosome, macropain) subunit, beta type, 5	proteasome complex|nucleus|nucleoplasm|cytosol|proteasome core complex|extracellular vesicular exosome|	G1/S transition of mitotic cell cycle|protein polyubiquitination|mitotic cell cycle|antigen processing and presentation of peptide antigen via MHC class I|antigen processing and presentation of exogenous peptide antigen via MHC class I, TAP-dependent|regulation of cellular amino acid metabolic process|apoptotic process|DNA damage response, signal transduction by p53 class mediator resulting in ce…	threonine-type endopeptidase activity|protein binding|	4	6.8	6.05	5	4.82	12.7	6.08	17.8	0.000663	2.73	11.4	1
ENSG00000168283	BMI1	BMI1 proto-oncogene, polycomb ring finger	ubiquitin ligase complex|nucleus|nucleoplasm|cytoplasm|PcG protein complex|PRC1 complex|	negative regulation of transcription from RNA polymerase II promoter|transcription, DNA-templated|segment specification|regulation of gene expression|chromatin modification|hemopoiesis|positive regulation of fibroblast proliferation|positive regulation of ubiquitin-protein transferase activity|	protein binding|zinc ion binding|RING-like zinc finger domain binding|	10	-3.09	14.8	10	-1.35	4.69	-2.36	17.8	0.000663	-5.41	-1.05	1
ENSG00000181464	CDRT1	CMT1A duplicated region transcript 1	cellular_component|	biological_process|	molecular_function|	10	2.98	7.65	10	4.11	10.9	3.67	17.7	0.000702	2.01	5.91	1
ENSG00000136110	LECT1	leukocyte cell derived chemotaxin 1	proteinaceous extracellular matrix|endomembrane system|integral component of membrane|	skeletal system development|endothelial cell morphogenesis|negative regulation of endothelial cell proliferation|proteoglycan metabolic process|negative regulation of angiogenesis|negative regulation of vascular endothelial growth factor receptor signaling pathway|cartilage development|	None	9	1.21	0.00489	9	-6.66	20.7	-6.51	17.6	0.000738	-14.7	-4.53	1
ENSG00000066185	ZMYND12	zinc finger, MYND-type containing 12	intracellular|	None	metal ion binding|	10	5.56	19.9	10	0	0	5.2	17.6	0.000738	2.87	9.28	1
ENSG00000158156	XKR8	XK, Kell blood group complex subunit-related family, member 8	plasma membrane|integral component of membrane|	engulfment of apoptotic cell|phosphatidylserine exposure on apoptotic cell surface|	None	10	4.82	10.9	10	6.33	7.32	5.07	17.4	0.000848	2.76	8.73	1
ENSG00000112852	PCDHB2	protocadherin beta 2	integral component of plasma membrane|integral component of membrane|	cell adhesion|homophilic cell adhesion|synaptic transmission|nervous system development|synapse assembly|calcium-dependent cell-cell adhesion|	calcium ion binding|	10	9.55	8.32	10	5.81	11.1	7.33	17.3	0.000905	3.1	13.3	1
ENSG00000169436	COL22A1	collagen, type XXII, alpha 1	extracellular region|proteinaceous extracellular matrix|collagen trimer|endoplasmic reticulum lumen|	extracellular matrix organization|	None	10	0.5	0.0407	10	-6.62	20.5	-6.46	17.3	0.000905	-14.7	-4.46	1
ENSG00000103855	CD276	CD276 molecule	external side of plasma membrane|integral component of membrane|extracellular vesicular exosome|	immune response|cell proliferation|positive regulation of bone mineralization|positive regulation of T cell proliferation|T cell activation|negative regulation of T cell proliferation|negative regulation of interferon-gamma biosynthetic process|positive regulation of interferon-gamma biosynthetic process|negative regulation of interleukin-2 biosynthetic process|positive regulation of osteoblast d…	receptor binding|protein binding|	9	6.55	9.75	10	7.12	7.95	6.85	17.2	0.000961	4.31	12.6	1
ENSG00000185760	KCNQ5	potassium voltage-gated channel, KQT-like subfamily, member 5	plasma membrane|voltage-gated potassium channel complex|	protein complex assembly|synaptic transmission|regulation of ion transmembrane transport|potassium ion transmembrane transport|	inward rectifier potassium channel activity|delayed rectifier potassium channel activity|	10	9.46	10.6	10	7.7	6.95	8.9	17	0.00111	2.9	14.9	0
ENSG00000128714	HOXD13	homeobox D13	nucleus|	skeletal system development|regulation of transcription, DNA-templated|transcription from RNA polymerase II promoter|multicellular organismal development|anterior/posterior pattern specification|male genitalia development|regulation of cell proliferation|embryonic digit morphogenesis|positive regulation of transcription from RNA polymerase II promoter|embryonic hindgut morphogenesis|prostate epit…	DNA binding|chromatin binding|sequence-specific DNA binding transcription factor activity|sequence-specific DNA binding|	10	0	0	10	-6.31	20.3	-6.15	17	0.00111	-13.8	-4.19	0
ENSG00000105146	AURKC	aurora kinase C	chromosome, centromeric region|condensed chromosome|nucleus|cytoplasm|spindle|midbody|midbody|chromosome passenger complex|spindle midzone|	cytokinesis|protein phosphorylation|meiotic nuclear division|attachment of spindle microtubules to kinetochore|histone modification|positive regulation of cytokinesis|spindle midzone assembly involved in mitosis|	protein kinase activity|protein serine/threonine kinase activity|protein serine/threonine/tyrosine kinase activity|ATP binding|	10	6.52	9.67	10	5.9	7.85	6.47	17	0.00111	3.23	10.9	0
ENSG00000136802	LRRC8A	leucine rich repeat containing 8 family, member A	plasma membrane|cell surface|membrane|ion channel complex|	pre-B cell differentiation|anion transport|cell volume homeostasis|response to osmotic stress|	anion channel activity|protein binding|	9	5.26	9.49	10	-2.71	8.18	4.88	16.8	0.00126	2.64	9.7	0
ENSG00000020256	ZFP64	ZFP64 zinc finger protein	nucleus|	transcription, DNA-templated|regulation of transcription, DNA-templated|	DNA binding|metal ion binding|	10	-1.78	12.7	10	-1.46	4.55	-1.7	16.8	0.00126	-3.24	-0.75	0
ENSG00000155975	VPS37A	vacuolar protein sorting 37 homolog A (S. cerevisiae)	ESCRT I complex|nucleus|cytoplasm|centrosome|endosome membrane|late endosome membrane|intracellular membrane-bounded organelle|	cell death|protein transport|viral process|endosomal transport|viral life cycle|virion assembly|viral protein processing|ubiquitin-dependent protein catabolic process via the multivesicular body sorting pathway|ubiquitin-dependent protein catabolic process via the multivesicular body sorting pathway|membrane organization|intracellular transport of virus|	None	9	3.78	8	9	3.45	9.26	3.6	16.8	0.00126	1.92	6.37	0
ENSG00000152492	CCDC50	coiled-coil domain containing 50	cytoplasm|	None	protein binding|	9	4.78	9.38	9	4.8	7.75	4.79	16.7	0.00133	2.77	8.13	0
ENSG00000115525	ST3GAL5	ST3 beta-galactoside alpha-2,3-sialyltransferase 5	Golgi membrane|integral component of plasma membrane|integral component of membrane|integral component of Golgi membrane|	ganglioside biosynthetic process|carbohydrate metabolic process|protein glycosylation|glycosphingolipid biosynthetic process|sialylation|sialylation|sialylation|	neolactotetraosylceramide alpha-2,3-sialyltransferase activity|sialyltransferase activity|lactosylceramide alpha-2,3-sialyltransferase activity|	10	4.89	8.15	10	4.21	8.95	4.6	16.6	0.0014	2.29	7.43	0
ENSG00000173653	RCE1	Ras converting CAAX endopeptidase 1	endoplasmic reticulum membrane|integral component of plasma membrane|membrane|	proteolysis|CAAX-box protein processing|	cysteine-type endopeptidase activity|metalloendopeptidase activity|	9	-1.53	6.1	9	-2.21	11.1	-1.91	16.5	0.00146	-3.72	-0.83	0
ENSG00000131148	EMC8	ER membrane protein complex subunit 8	nucleus|cytoplasm|mitochondrion|membrane|ER membrane protein complex|	None	None	9	3.75	12.9	9	2.6	4.63	3.13	16.5	0.00146	1.56	5.77	0
ENSG00000134684	YARS	tyrosyl-tRNA synthetase	extracellular space|nucleus|cytoplasm|cytosol|	tRNA aminoacylation for protein translation|tyrosyl-tRNA aminoacylation|apoptotic process|signal transduction|gene expression|	tRNA binding|tyrosine-tRNA ligase activity|signal transducer activity|interleukin-8 receptor binding|ATP binding|poly(A) RNA binding|	2	7.97	9.94	2	8.25	6.91	7.98	16.4	0.00153	5.35	15.6	0
ENSG00000261052	SULT1A3	sulfotransferase family, cytosolic, 1A, phenol-preferring, member 3	None	None	None	10	4.09	10.9	10	2.85	6.28	3.71	16.4	0.00153	1.78	6.08	0
ENSG00000147606	SLC26A7	solute carrier family 26 (anion exchanger), member 7	cytoplasm|endosome|plasma membrane|integral component of membrane|basolateral plasma membrane|recycling endosome membrane|	gastric acid secretion|ion transport|anion transport|chloride transport|sulfate transport|bicarbonate transport|oxalate transport|transmembrane transport|sulfate transmembrane transport|sulfate transmembrane transport|chloride transmembrane transport|chloride transmembrane transport|	chloride channel activity|bicarbonate transmembrane transporter activity|sulfate transmembrane transporter activity|anion:anion antiporter activity|oxalate transmembrane transporter activity|	10	6.85	8.87	10	4.45	9.02	5.24	16.4	0.00153	2.84	9.71	0
ENSG00000141452	C18ORF8	chromosome 18 open reading frame 8	lysosomal membrane|	None	None	9	3.27	9.45	9	3.32	7.28	3.27	16.3	0.00159	1.71	5.32	0
ENSG00000130164	LDLR	low density lipoprotein receptor	lysosome|early endosome|late endosome|Golgi apparatus|plasma membrane|integral component of plasma membrane|coated pit|external side of plasma membrane|cell surface|endosome membrane|membrane|clathrin-coated endocytic vesicle membrane|low-density lipoprotein particle|receptor complex|	retinoid metabolic process|lipid metabolic process|endocytosis|receptor-mediated endocytosis|phototransduction, visible light|cholesterol metabolic process|positive regulation of triglyceride biosynthetic process|regulation of phosphatidylcholine catabolic process|phospholipid transport|viral process|intestinal cholesterol absorption|cholesterol transport|low-density lipoprotein particle clearanc…	glycoprotein binding|low-density lipoprotein receptor activity|calcium ion binding|protein binding|low-density lipoprotein particle binding|very-low-density lipoprotein particle receptor activity|	9	-1.64	9.56	10	-1.73	7.15	-1.69	16.3	0.00159	-3.26	-0.74	0
ENSG00000137731	FXYD2	FXYD domain containing ion transport regulator 2	plasma membrane|sodium:potassium-exchanging ATPase complex|basolateral plasma membrane|intracellular membrane-bounded organelle|extracellular vesicular exosome|	regulation of cell growth|transport|potassium ion transport|ion transmembrane transport|sodium ion transmembrane transport|sodium ion transmembrane transport|regulation of cell proliferation|transmembrane transport|	transporter activity|ion channel activity|sodium:potassium-exchanging ATPase activity|	10	0	0	10	-6.17	19.2	-5.93	16.2	0.00168	-13.8	-3.95	0
ENSG00000088682	COQ9	coenzyme Q9	mitochondrion|	mitochondrial electron transport, NADH to ubiquinone|ubiquinone biosynthetic process|	None	10	0	0	10	-3.47	19	-3.29	16.2	0.00168	-7.09	-1.74	0
ENSG00000181378	CCDC108	coiled-coil domain containing 108	integral component of membrane|	None	structural molecule activity|poly(A) RNA binding|	10	5.63	12	10	5.4	4.41	5.5	16	0.00184	2.67	10.8	0
ENSG00000108294	PSMB3	proteasome (prosome, macropain) subunit, beta type, 3	proteasome complex|nucleus|nucleoplasm|cytoplasm|mitochondrion|Golgi apparatus|cytosol|proteasome core complex|actin cytoskeleton|extracellular vesicular exosome|	G1/S transition of mitotic cell cycle|protein polyubiquitination|mitotic cell cycle|antigen processing and presentation of peptide antigen via MHC class I|antigen processing and presentation of exogenous peptide antigen via MHC class I, TAP-dependent|regulation of cellular amino acid metabolic process|apoptotic process|DNA damage response, signal transduction by p53 class mediator resulting in ce…	threonine-type endopeptidase activity|protein binding|	8	8.36	11.5	6	6.01	5.12	7.54	15.8	0.00204	4.44	14.5	0
ENSG00000152520	PAN3	PAN3 poly(A) specific ribonuclease subunit	cytoplasmic mRNA processing body|cytosol|PAN complex|	nuclear-transcribed mRNA catabolic process, deadenylation-dependent decay|nuclear-transcribed mRNA poly(A) tail shortening|deadenylation-dependent decapping of nuclear-transcribed mRNA|protein phosphorylation|protein targeting|gene expression|positive regulation of cytoplasmic mRNA processing body assembly|RNA metabolic process|mRNA metabolic process|RNA phosphodiester bond hydrolysis, exonucleol…	poly(A)-specific ribonuclease activity|protein kinase activity|protein binding|ATP binding|metal ion binding|	10	3.44	6.37	10	5.38	10.3	4.13	15.7	0.00212	1.86	7.66	0
ENSG00000066336	SPI1	Spi-1 proto-oncogene	nuclear chromatin|	negative regulation of transcription from RNA polymerase II promoter|lymphoid progenitor cell differentiation|regulation of transcription from RNA polymerase II promoter|transcription from RNA polymerase II promoter|transcription from RNA polymerase II promoter|transcription from RNA polymerase II promoter|lymphocyte differentiation|erythrocyte differentiation|macrophage differentiation|granulocy…	RNA polymerase II distal enhancer sequence-specific DNA binding|sequence-specific DNA binding RNA polymerase II transcription factor activity|core promoter binding|RNA polymerase II transcription factor binding|RNA polymerase II distal enhancer sequence-specific DNA binding transcription factor activity involved in positive regulation of transcription|sequence-specific DNA binding transcription f…	10	-1.75	1.72	10	-2.5	14.6	-2.33	15.7	0.00212	-5.02	-0.98	0
ENSG00000163930	BAP1	BRCA1 associated protein-1 (ubiquitin carboxy-terminal hydrolase)	nucleus|cytoplasm|PR-DUB complex|	regulation of cell growth|cellular protein modification process|ubiquitin-dependent protein catabolic process|negative regulation of cell proliferation|protein deubiquitination|monoubiquitinated protein deubiquitination|monoubiquitinated histone H2A deubiquitination|regulation of cell cycle|protein K48-linked deubiquitination|	chromatin binding|ubiquitin thiolesterase activity|ubiquitin thiolesterase activity|ubiquitin-specific protease activity|protein binding|peptidase activity|	7	3.28	7.98	5	4.32	8.49	3.99	15.7	0.00212	1.95	7.66	0
ENSG00000153902	LGI4	leucine-rich repeat LGI family, member 4	extracellular space|	adult locomotory behavior|glial cell proliferation|myelination in peripheral nervous system|neuron maturation|	None	10	11.3	9.56	10	9.36	6.9	10.3	15.7	0.00212	7.01	20.9	0
ENSG00000075539	FRYL	FRY-like	None	transcription, DNA-templated|regulation of transcription, DNA-templated|	None	10	4.3	6.33	10	3.8	9.74	3.9	15.6	0.00221	1.87	6.97	0
ENSG00000112983	BRD8	bromodomain containing 8	Swr1 complex|nucleus|nucleus|nucleoplasm|mitochondrion|NuA4 histone acetyltransferase complex|	chromatin organization|transcription, DNA-templated|regulation of transcription, DNA-templated|regulation of transcription from RNA polymerase II promoter|signal transduction|cell surface receptor signaling pathway|intracellular receptor signaling pathway|regulation of growth|histone H4 acetylation|histone H2A acetylation|	sequence-specific DNA binding transcription factor activity|thyroid hormone receptor activity|	8	-0.27	0.114	8	-2.84	17.5	-2.6	15.6	0.00221	-6.21	-1.22	0
ENSG00000184307	ZDHHC23	zinc finger, DHHC-type containing 23	integral component of membrane|	protein palmitoylation|protein localization to plasma membrane|	zinc ion binding|protein-cysteine S-palmitoyltransferase activity|	10	6.67	13.4	10	5.7	2.43	6.67	15.4	0.00238	2.89	12.7	0
ENSG00000041357	PSMA4	proteasome (prosome, macropain) subunit, alpha type, 4	proteasome complex|cytoplasmic mRNA processing body|nucleus|nucleoplasm|cytosol|proteasome core complex|proteasome core complex, alpha-subunit complex|extracellular vesicular exosome|	G1/S transition of mitotic cell cycle|protein polyubiquitination|mitotic cell cycle|antigen processing and presentation of peptide antigen via MHC class I|antigen processing and presentation of exogenous peptide antigen via MHC class I, TAP-dependent|regulation of cellular amino acid metabolic process|apoptotic process|DNA damage response, signal transduction by p53 class mediator resulting in ce…	threonine-type endopeptidase activity|protein binding|	6	5.13	9.42	7	5.41	6.43	5.29	15.4	0.00238	2.8	9.46	0
ENSG00000101182	PSMA7	proteasome (prosome, macropain) subunit, alpha type, 7	proteasome complex|nucleus|nucleoplasm|cytosol|proteasome core complex|proteasome core complex, alpha-subunit complex|extracellular vesicular exosome|	G1/S transition of mitotic cell cycle|protein polyubiquitination|mitotic cell cycle|antigen processing and presentation of peptide antigen via MHC class I|antigen processing and presentation of exogenous peptide antigen via MHC class I, TAP-dependent|regulation of cellular amino acid metabolic process|apoptotic process|DNA damage response, signal transduction by p53 class mediator resulting in ce…	threonine-type endopeptidase activity|protein binding|identical protein binding|	5	6.32	6.28	6	5.54	9.49	5.73	15.3	0.00245	2.8	11.3	0
ENSG00000106025	TSPAN12	tetraspanin 12	integral component of plasma membrane|membrane|integral component of membrane|	angiogenesis|cell surface receptor signaling pathway|retina layer formation|regulation of angiogenesis|	None	10	5.95	13.2	10	7.36	2.53	6.26	15.3	0.00245	2.77	12	0
ENSG00000142959	BEST4	bestrophin 4	plasma membrane|chloride channel complex|	biological_process|chloride transmembrane transport|	molecular_function|chloride channel activity|	10	4.86	9.23	10	5.07	6.43	4.97	15.3	0.00245	2.41	8.54	0
ENSG00000101596	SMCHD1	structural maintenance of chromosomes flexible hinge domain containing 1	Barr body|	chromosome organization|inactivation of X chromosome by DNA methylation|	ATP binding|	9	-1.48	5.2	9	-1.92	10.5	-1.78	15.2	0.00252	-3.84	-0.78	0
ENSG00000058272	PPP1R12A	protein phosphatase 1, regulatory subunit 12A	kinetochore|nucleoplasm|cytoplasm|centrosome|actin cytoskeleton|contractile fiber|PTW/PP1 phosphatase complex|	G2/M transition of mitotic cell cycle|mitotic cell cycle|protein dephosphorylation|mitotic nuclear division|signal transduction|regulation of cell adhesion|regulation of myosin-light-chain-phosphatase activity|negative regulation of catalytic activity|positive regulation of transcription from RNA polymerase II promoter|regulation of nucleocytoplasmic transport|centrosome organization|	enzyme inhibitor activity|signal transducer activity|protein binding|phosphatase regulator activity|phosphatase regulator activity|protein kinase binding|14-3-3 protein binding|	9	2.4	5.3	10	3.06	10.7	2.75	15.2	0.00252	1.32	4.96	0
ENSG00000169592	INO80E	INO80 complex subunit E	nucleus|nucleolus|Ino80 complex|	DNA replication|DNA repair|DNA recombination|transcription, DNA-templated|regulation of transcription, DNA-templated|	protein binding|	10	6.56	7.82	10	4.86	8.49	5.25	15.2	0.00252	2.45	9.9	0
ENSG00000131828	PDHA1	pyruvate dehydrogenase (lipoamide) alpha 1	nucleus|mitochondrion|mitochondrial matrix|pyruvate dehydrogenase complex|	glucose metabolic process|acetyl-CoA biosynthetic process from pyruvate|pyruvate metabolic process|glycolytic process|tricarboxylic acid cycle|regulation of acetyl-CoA biosynthetic process from pyruvate|cellular metabolic process|small molecule metabolic process|	pyruvate dehydrogenase activity|pyruvate dehydrogenase (acetyl-transferring) activity|	10	-1.55	5.71	10	-2.05	9.98	-1.84	15.1	0.0026	-3.78	-0.75	0
ENSG00000175166	PSMD2	proteasome (prosome, macropain) 26S subunit, non-ATPase, 2	proteasome complex|nucleoplasm|cytosol|proteasome regulatory particle|membrane|proteasome accessory complex|extracellular vesicular exosome|	G1/S transition of mitotic cell cycle|protein polyubiquitination|mitotic cell cycle|antigen processing and presentation of peptide antigen via MHC class I|antigen processing and presentation of exogenous peptide antigen via MHC class I, TAP-dependent|regulation of cellular amino acid metabolic process|apoptotic process|DNA damage response, signal transduction by p53 class mediator resulting in ce…	protein binding|enzyme regulator activity|	6	3.14	6.97	6	3.67	8.55	3.59	15.1	0.0026	1.59	6.91	0
ENSG00000164096	C4ORF3	chromosome 4 open reading frame 3	integral component of membrane|	None	None	10	5.77	4.96	10	4.05	10.9	4.69	15.1	0.0026	2.29	8.61	0
ENSG00000172663	TMEM134	transmembrane protein 134	integral component of membrane|	None	None	10	6.49	9.42	10	5.73	6.21	6.2	15.1	0.0026	3.39	11	0
ENSG00000168395	ING5	inhibitor of growth family, member 5	nucleus|nucleoplasm|MOZ/MORF histone acetyltransferase complex|	DNA replication|chromatin organization|transcription, DNA-templated|protein acetylation|negative regulation of cell proliferation|negative regulation of cell proliferation|positive regulation of apoptotic process|histone H3 acetylation|positive regulation of transcription, DNA-templated|negative regulation of growth|positive regulation of apoptotic signaling pathway|	chromatin binding|protein binding|zinc ion binding|methylated histone binding|	10	-1.7	7.6	10	-1.66	7.83	-1.68	15	0.00267	-3.46	-0.69	0
ENSG00000183134	PTGDR2	prostaglandin D2 receptor 2	plasma membrane|integral component of plasma membrane|	chemotaxis|immune response|G-protein coupled receptor signaling pathway|adenylate cyclase-inhibiting G-protein coupled receptor signaling pathway|calcium-mediated signaling|positive regulation of G-protein coupled receptor protein signaling pathway|	prostaglandin J receptor activity|G-protein coupled receptor activity|prostaglandin D receptor activity|prostaglandin F receptor activity|	10	5.69	12.5	10	3.43	4	4.79	15	0.00267	2.16	8.78	0
ENSG00000149639	SOGA1	suppressor of glucose, autophagy associated 1	extracellular space|extracellular vesicular exosome|	insulin receptor signaling pathway|regulation of autophagy|negative regulation of gluconeogenesis|	molecular_function|	10	3.96	8.62	10	3.39	6.99	3.69	15	0.00267	1.63	6.25	0
ENSG00000204843	DCTN1	dynactin 1	kinetochore|spindle pole|cytoplasm|centrosome|cytosol|dynactin complex|microtubule|membrane|dynein complex|cell leading edge|	G2/M transition of mitotic cell cycle|mitotic cell cycle|activation of signaling protein activity involved in unfolded protein response|mitotic nuclear division|nervous system development|cell death|microtubule-based transport|antigen processing and presentation of exogenous peptide antigen via MHC class II|endoplasmic reticulum unfolded protein response|cellular protein metabolic process|	motor activity|protein binding|dynein binding|	8	5.79	7.3	9	5.17	8.18	5.54	15	0.00267	2.86	9.55	0
ENSG00000119969	HELLS	helicase, lymphoid-specific	chromosome, centromeric region|nucleus|centromeric heterochromatin|	urogenital system development|methylation-dependent chromatin silencing|transcription, DNA-templated|mitotic nuclear division|multicellular organismal development|maintenance of DNA methylation|centromeric heterochromatin assembly|negative regulation of apoptotic process|lymphocyte proliferation|negative regulation of intrinsic apoptotic signaling pathway|	DNA binding|chromatin binding|helicase activity|protein binding|ATP binding|	10	-2	12.6	10	-1.46	2.89	-1.8	14.9	0.00272	-3.95	-0.73	0
ENSG00000018510	AGPS	alkylglycerone phosphate synthase	nucleolus|mitochondrion|peroxisome|peroxisomal membrane|peroxisomal matrix|membrane|intracellular membrane-bounded organelle|	lipid biosynthetic process|ether lipid biosynthetic process|ether lipid biosynthetic process|ether lipid biosynthetic process|cellular lipid metabolic process|small molecule metabolic process|oxidation-reduction process|	alkylglycerone-phosphate synthase activity|UDP-N-acetylmuramate dehydrogenase activity|FAD binding|	8	3.69	9.33	9	3.43	6.01	3.53	14.9	0.00272	1.76	6.24	0
ENSG00000136731	UGGT1	UDP-glucose glycoprotein glucosyltransferase 1	endoplasmic reticulum|endoplasmic reticulum lumen|endoplasmic reticulum-Golgi intermediate compartment|extracellular vesicular exosome|	protein folding|protein N-linked glycosylation via asparagine|post-translational protein modification|cellular protein metabolic process|'de novo' posttranslational protein folding|UDP-glucosylation|	UDP-glucose:glycoprotein glucosyltransferase activity|unfolded protein binding|	10	-2.05	8.77	10	-1.7	6.56	-1.87	14.9	0.00272	-3.92	-0.77	0
ENSG00000136478	TEX2	testis expressed 2	integral component of membrane|	sphingolipid metabolic process|signal transduction|	molecular_function|	10	6.79	7.47	10	5.72	8	6.28	14.9	0.00272	3.1	10.9	0
ENSG00000164167	LSM6	LSM6 homolog, U6 small nuclear RNA associated (S. cerevisiae)	spliceosomal complex|cytosol|small nuclear ribonucleoprotein complex|extracellular vesicular exosome|	nuclear-transcribed mRNA catabolic process, deadenylation-dependent decay|rRNA processing|mRNA processing|tRNA processing|RNA splicing|gene expression|RNA metabolic process|mRNA metabolic process|exonucleolytic nuclear-transcribed mRNA catabolic process involved in deadenylation-dependent decay|	protein binding|poly(A) RNA binding|	4	3.72	4.82	5	4.49	10.6	4.19	14.8	0.00275	2.23	8.36	0
ENSG00000149582	TMEM25	transmembrane protein 25	extracellular region|plasma membrane|integral component of membrane|	None	None	10	10.2	5.88	10	9.72	9.36	9.8	14.8	0.00275	6.84	19.3	0
ENSG00000115233	PSMD14	proteasome (prosome, macropain) 26S subunit, non-ATPase, 14	proteasome complex|nucleus|nucleoplasm|cytosol|proteasome regulatory particle, lid subcomplex|proteasome accessory complex|extracellular vesicular exosome|	G1/S transition of mitotic cell cycle|protein polyubiquitination|mitotic cell cycle|double-strand break repair via homologous recombination|antigen processing and presentation of peptide antigen via MHC class I|antigen processing and presentation of exogenous peptide antigen via MHC class I, TAP-dependent|double-strand break repair via nonhomologous end joining|ubiquitin-dependent protein catabol…	ubiquitin thiolesterase activity|ubiquitin thiolesterase activity|metallopeptidase activity|metal ion binding|endopeptidase activator activity|proteasome binding|	7	2.29	3.92	10	3.72	11.8	3.13	14.8	0.00275	1.5	5.95	0
ENSG00000271793	RP11-321N4.5	N/A	None	None	None	10	3.76	8.66	10	3.32	6.36	3.45	14.6	0.0028	1.73	6.11	0
ENSG00000148842	CNNM2	cyclin M2	integral component of membrane|basolateral plasma membrane|	magnesium ion homeostasis|magnesium ion transport|	adenyl nucleotide binding|	10	4.9	8.09	10	6.55	7.07	4.85	14.5	0.00282	2.35	9.61	0
ENSG00000164040	PGRMC2	progesterone receptor membrane component 2	membrane|integral component of membrane|	steroid hormone mediated signaling pathway|	steroid hormone receptor activity|steroid binding|heme binding|	10	-1.69	4.93	10	-2.47	10.4	-2.13	14.5	0.00282	-4.56	-0.89	0
ENSG00000143033	MTF2	metal response element binding transcription factor 2	nucleus|cytoplasm|ESC/E(Z) complex|	negative regulation of transcription from RNA polymerase II promoter|segment specification|chromatin modification|stem cell maintenance|positive regulation of transcription from RNA polymerase II promoter|stem cell differentiation|negative regulation of histone H3-K27 methylation|positive regulation of histone H3-K27 methylation|	DNA binding|zinc ion binding|methylated histone binding|	10	-2.5	13.1	10	-1.33	2.42	-2	14.4	0.00284	-4.99	-0.8	0
ENSG00000134371	CDC73	cell division cycle 73	nucleus|Cdc73/Paf1 complex|	negative regulation of transcription from RNA polymerase II promoter|endodermal cell fate commitment|transcription, DNA-templated|mRNA polyadenylation|cell cycle|negative regulation of cell proliferation|histone monoubiquitination|Wnt signaling pathway|stem cell maintenance|positive regulation of Wnt signaling pathway|positive regulation of mRNA 3'-end processing|protein destabilization|positive …	RNA polymerase II core binding|protein binding|	6	5.94	8.19	6	5.9	6.6	5.9	14.4	0.00284	2.82	11.1	0
ENSG00000112357	PEX7	peroxisomal biogenesis factor 7	peroxisome|peroxisomal matrix|cytosol|	neuron migration|endochondral ossification|fatty acid beta-oxidation|peroxisome organization|ether lipid biosynthetic process|protein import into peroxisome matrix|protein import into peroxisome matrix|	peroxisome matrix targeting signal-2 binding|enzyme binding|protein homodimerization activity|	10	3.11	3.08	8	6.26	12.8	5.62	14.4	0.00284	2.31	10.8	0
ENSG00000108100	CCNY	cyclin Y	cytoplasmic cyclin-dependent protein kinase holoenzyme complex|nucleus|plasma membrane|extracellular vesicular exosome|	G2/M transition of mitotic cell cycle|Wnt signaling pathway|positive regulation of cyclin-dependent protein serine/threonine kinase activity|cell division|regulation of canonical Wnt signaling pathway|	protein binding|cyclin-dependent protein serine/threonine kinase regulator activity|protein kinase binding|	10	-1.62	5.83	10	-2.39	9.19	-2.13	14.3	0.00286	-4.42	-0.83	0
ENSG00000065135	GNAI3	guanine nucleotide binding protein (G protein), alpha inhibiting activity polypeptide 3	cytoplasm|lysosomal membrane|Golgi apparatus|centrosome|heterotrimeric G-protein complex|plasma membrane|plasma membrane|membrane|midbody|zymogen granule|membrane raft|extracellular vesicular exosome|	GTP catabolic process|transport|vesicle fusion|cell cycle|adenylate cyclase-modulating G-protein coupled receptor signaling pathway|adenylate cyclase-inhibiting G-protein coupled receptor signaling pathway|negative regulation of adenylate cyclase activity|synaptic transmission|blood coagulation|platelet activation|cell division|	GTPase activity|signal transducer activity|GTP binding|protein domain specific binding|G-protein beta/gamma-subunit complex binding|G-protein coupled serotonin receptor binding|GTPase activating protein binding|metal ion binding|	9	-1.88	11.3	10	-1.16	3.73	-1.68	14.2	0.00287	-3.53	-0.63	0
ENSG00000198892	SHISA4	shisa family member 4	integral component of membrane|	None	None	10	5.93	8.42	10	3.92	6.24	5.84	14.2	0.00287	2.39	9.67	0
ENSG00000175893	ZDHHC21	zinc finger, DHHC-type containing 21	Golgi membrane|Golgi apparatus|plasma membrane|integral component of membrane|	hair follicle development|peptidyl-L-cysteine S-palmitoylation|protein palmitoylation|small molecule metabolic process|nitric oxide metabolic process|sebaceous gland development|regulation of nitric-oxide synthase activity|	zinc ion binding|palmitoyltransferase activity|protein-cysteine S-palmitoyltransferase activity|	10	8.26	13.2	10	5.54	1.89	8.13	14.1	0.00289	4.17	15.3	0
ENSG00000104635	SLC39A14	solute carrier family 39 (zinc transporter), member 14	endoplasmic reticulum|Golgi apparatus|plasma membrane|plasma membrane|integral component of plasma membrane|integral component of membrane|lamellipodium|	cellular zinc ion homeostasis|ferrous iron transport|transmembrane transport|zinc ion transmembrane transport|zinc ion transmembrane transport|zinc ion transmembrane import|	zinc ion transmembrane transporter activity|ferrous iron transmembrane transporter activity|	10	2.99	5.87	10	3.21	8.62	3.07	14.1	0.00289	1.44	5.4	0
ENSG00000128731	HERC2	HECT and RLD domain containing E3 ubiquitin protein ligase 2	nucleus|cytoplasm|mitochondrial inner membrane|centriole|membrane|	DNA repair|intracellular protein transport|cellular response to DNA damage stimulus|spermatogenesis|protein ubiquitination|protein ubiquitination involved in ubiquitin-dependent protein catabolic process|positive regulation of GTPase activity|	ubiquitin-protein transferase activity|guanyl-nucleotide exchange factor activity|protein binding|zinc ion binding|ligase activity|heme binding|ubiquitin protein ligase binding|SUMO binding|	10	-1.72	8.26	10	-1.65	6.24	-1.69	14.1	0.00289	-3.38	-0.68	0
ENSG00000197965	MPZL1	myelin protein zero-like 1	integral component of plasma membrane|	transmembrane receptor protein tyrosine kinase signaling pathway|cell-cell signaling|	structural molecule activity|protein binding|	9	-0.41	0.164	10	7.07	14.5	6.92	14	0.0029	4.11	12.3	0
ENSG00000138081	FBXO11	F-box protein 11	ubiquitin ligase complex|nucleus|chromosome|nucleolus|cytoplasm|	cellular protein modification process|ubiquitin-dependent protein catabolic process|sensory perception of sound|protein ubiquitination|protein ubiquitination|peptidyl-arginine N-methylation|	ubiquitin-protein transferase activity|protein binding|zinc ion binding|protein-arginine N-methyltransferase activity|	9	2.71	5.11	10	3.73	9.74	3.41	14	0.0029	1.53	5.99	0
ENSG00000170522	ELOVL6	ELOVL fatty acid elongase 6	endoplasmic reticulum|endoplasmic reticulum membrane|integral component of endoplasmic reticulum membrane|	fatty acid elongation, saturated fatty acid|triglyceride biosynthetic process|long-chain fatty-acyl-CoA biosynthetic process|long-chain fatty acid biosynthetic process|cellular lipid metabolic process|small molecule metabolic process|	protein binding|transferase activity, transferring acyl groups other than amino-acyl groups|	10	3.7	9.55	10	2.45	5.21	3.08	13.9	0.00292	1.38	5.59	0
ENSG00000189052	CGB5	chorionic gonadotropin, beta polypeptide 5	None	None	None	9	3.67	10.1	10	3.12	4.24	3.36	13.8	0.00293	1.51	6.15	0
ENSG00000183678	CTAG1A	cancer/testis antigen 1A	cytoplasm|	None	protein binding|	10	4.1	9.15	10	3.24	5.21	3.74	13.8	0.00293	1.64	6.66	0
ENSG00000100811	YY1	YY1 transcription factor	nucleus|transcription factor complex|nuclear matrix|Ino80 complex|PcG protein complex|	negative regulation of transcription from RNA polymerase II promoter|double-strand break repair via homologous recombination|transcription, DNA-templated|regulation of transcription from RNA polymerase II promoter|RNA localization|cellular response to DNA damage stimulus|spermatogenesis|anterior/posterior pattern specification|response to UV-C|cell differentiation|cellular response to UV|response…	four-way junction DNA binding|RNA polymerase II core promoter proximal region sequence-specific DNA binding transcription factor activity involved in negative regulation of transcription|DNA binding|sequence-specific DNA binding transcription factor activity|transcription coactivator activity|transcription corepressor activity|RNA binding|protein binding|zinc ion binding|transcription regulatory …	9	3.67	8.67	9	3.38	5.52	3.51	13.8	0.00293	1.45	6.1	0
ENSG00000198055	GRK6	G protein-coupled receptor kinase 6	membrane|	protein phosphorylation|regulation of G-protein coupled receptor protein signaling pathway|Wnt signaling pathway|termination of G-protein coupled receptor signaling pathway|	G-protein coupled receptor kinase activity|protein binding|ATP binding|	9	3.26	8.61	9	2.53	5.74	2.71	13.7	0.00295	1.29	5.26	0
ENSG00000033800	PIAS1	protein inhibitor of activated STAT, 1	nucleus|nucleoplasm|PML body|nuclear speck|	negative regulation of transcription from RNA polymerase II promoter|transcription, DNA-templated|JAK-STAT cascade|spermatogenesis|protein sumoylation|protein sumoylation|cytokine-mediated signaling pathway|androgen receptor signaling pathway|positive regulation of proteasomal ubiquitin-dependent protein catabolic process|positive regulation of protein sumoylation|regulation of cell proliferation…	DNA binding|transcription coactivator activity|transcription corepressor activity|protein binding|zinc ion binding|SUMO ligase activity|enzyme binding|protein domain specific binding|ubiquitin protein ligase binding|androgen receptor binding|	10	3.86	5.66	10	4.22	8.49	4.12	13.7	0.00295	1.77	7.48	0
ENSG00000065600	TMEM206	transmembrane protein 206	integral component of membrane|	None	None	10	8.73	9.11	10	9.09	4.94	8.9	13.6	0.00296	5.55	17	0
ENSG00000270800	RPS10-NUDT3	RPS10-NUDT3 readthrough	None	None	None	9	3.14	5.99	9	3.57	8.02	3.38	13.6	0.00296	1.5	5.94	0
ENSG00000188612	SUMO2	small ubiquitin-like modifier 2	nucleoplasm|PML body|	protein sumoylation|protein sumoylation|positive regulation of proteasomal ubiquitin-dependent protein catabolic process|post-translational protein modification|cellular protein metabolic process|	protein binding|ubiquitin protein ligase binding|poly(A) RNA binding|	6	4.97	7.34	7	4.22	6.77	4.39	13.6	0.00296	1.98	8.4	0
ENSG00000169446	MMGT1	membrane magnesium transporter 1	Golgi membrane|early endosome|Golgi apparatus|membrane|integral component of membrane|early endosome membrane|ER membrane protein complex|	magnesium ion transport|	magnesium ion transmembrane transporter activity|	9	4.39	7.51	10	3.58	6.77	4.02	13.6	0.00296	1.58	7.79	0
ENSG00000137414	FAM8A1	family with sequence similarity 8, member A1	integral component of membrane|	None	None	10	5.18	6.1	10	5.55	7.97	5.56	13.6	0.00296	2.42	10.2	0
ENSG00000106560	GIMAP2	GTPase, IMAP family member 2	cytoplasm|lipid particle|integral component of membrane|	None	GTP binding|	10	4.65	3.53	10	6.56	10.4	6.47	13.5	0.00298	2.68	11.7	0
ENSG00000124134	KCNS1	potassium voltage-gated channel, delayed-rectifier, subfamily S, member 1	plasma membrane|plasma membrane|voltage-gated potassium channel complex|	potassium ion transport|synaptic transmission|regulation of ion transmembrane transport|protein homooligomerization|potassium ion transmembrane transport|	delayed rectifier potassium channel activity|protein binding|potassium channel regulator activity|	10	3.98	6.82	10	6.79	7.32	4.13	13.5	0.00298	1.85	8.95	0
ENSG00000129244	ATP1B2	ATPase, Na+/K+ transporting, beta 2 polypeptide	cytoplasm|plasma membrane|sodium:potassium-exchanging ATPase complex|	transport|potassium ion transport|cell adhesion|blood coagulation|ion transmembrane transport|sodium ion transmembrane transport|leukocyte migration|transmembrane transport|	sodium:potassium-exchanging ATPase activity|protein binding|	10	7.93	7.57	10	6.07	6.54	6.25	13.5	0.00298	2.24	12.4	0
ENSG00000188305	C19ORF35	chromosome 19 open reading frame 35	None	None	None	9	4.96	6.73	10	4.42	7.25	4.96	13.5	0.00298	2.36	9.4	0
ENSG00000185009	AP3M1	adaptor-related protein complex 3, mu 1 subunit	lysosome|lysosomal membrane|Golgi apparatus|clathrin adaptor complex|cytoplasmic vesicle membrane|	protein targeting to lysosome|anterograde axon cargo transport|anterograde synaptic vesicle transport|	protein binding|Rab GTPase binding|	10	4.39	5.46	10	3.91	8.44	4.03	13.4	0.003	1.96	7.25	0
ENSG00000166170	BAG5	BCL2-associated athanogene 5	nucleus|membrane|inclusion body|perinuclear region of cytoplasm|	protein folding|negative regulation of protein ubiquitination|negative regulation of ubiquitin-protein transferase activity|negative regulation of protein refolding|neuron death|regulation of inclusion body assembly|	ubiquitin protein ligase binding|chaperone binding|	10	4.91	9.45	10	3.59	4.69	4.61	13.4	0.003	2.01	8.71	0
ENSG00000113212	PCDHB7	protocadherin beta 7	plasma membrane|integral component of membrane|	homophilic cell adhesion|	calcium ion binding|	10	8.19	10.2	10	8.22	3.42	8.21	13.3	0.00303	3.99	15.1	0
ENSG00000128708	HAT1	histone acetyltransferase 1	nuclear chromatin|nucleus|nucleoplasm|cytoplasm|nuclear matrix|intracellular membrane-bounded organelle|protein complex|	DNA packaging|chromatin organization|DNA replication-dependent nucleosome assembly|DNA replication-independent nucleosome assembly|chromatin silencing at telomere|internal protein amino acid acetylation|response to nutrient|histone acetylation|	histone acetyltransferase activity|protein binding|	10	6.54	1.56	10	9.5	12.6	8.33	13.2	0.00304	1.5	16.9	0
ENSG00000198366	HIST1H3A	histone cluster 1, H3a	None	None	None	10	6.48	13.1	10	2.77	1.66	5.94	13.2	0.00304	2.84	10.7	0
ENSG00000006652	IFRD1	interferon-related developmental regulator 1	nucleus|	multicellular organismal development|myoblast fate determination|adult somatic muscle development|	None	10	7.94	9.52	10	4.18	4.99	4.9	13.1	0.00306	1.7	11	0
ENSG00000132823	OSER1	oxidative stress responsive serine-rich 1	None	cellular response to hydrogen peroxide|	None	9	4.71	6.96	9	3.3	7.03	3.59	13.1	0.00306	1.66	6.63	0
ENSG00000166272	WBP1L	WW domain binding protein 1-like	integral component of membrane|	None	None	9	7.44	6.15	9	5.57	7.77	5.86	13.1	0.00306	2.9	12.2	0
ENSG00000133321	RARRES3	retinoic acid receptor responder (tazarotene induced) 3	integral component of membrane|	phospholipid metabolic process|negative regulation of cell proliferation|lipid catabolic process|	phospholipase A2 activity|protein binding|	10	5.62	9.28	10	5.67	3.99	5.62	12.9	0.00311	2.35	11.6	0
ENSG00000116906	GNPAT	glyceronephosphate O-acyltransferase	mitochondrion|peroxisome|peroxisome|peroxisomal membrane|peroxisomal membrane|peroxisomal matrix|membrane|	phospholipid metabolic process|phosphatidic acid biosynthetic process|synapse assembly|response to nutrient|ether lipid biosynthetic process|ether lipid biosynthetic process|cerebellum morphogenesis|paranodal junction assembly|response to drug|response to starvation|cellular lipid metabolic process|small molecule metabolic process|glycerophospholipid biosynthetic process|response to fatty acid|	receptor binding|glycerone-phosphate O-acyltransferase activity|glycerone-phosphate O-acyltransferase activity|palmitoyl-CoA hydrolase activity|	8	3.12	4.9	10	4.04	8.63	3.75	12.9	0.00311	1.6	6.9	0
ENSG00000060339	CCAR1	cell division cycle and apoptosis regulator 1	nucleoplasm|perinuclear region of cytoplasm|	mRNA splicing, via spliceosome|transcription, DNA-templated|regulation of transcription, DNA-templated|apoptotic process|cell cycle|RNA splicing|gene expression|	protein binding|ligand-dependent nuclear receptor transcription coactivator activity|poly(A) RNA binding|	8	4.36	5.05	9	5.64	8.39	4.63	12.9	0.00311	1.94	9.13	0
ENSG00000087253	LPCAT2	lysophosphatidylcholine acyltransferase 2	Golgi membrane|endoplasmic reticulum|endoplasmic reticulum|endoplasmic reticulum membrane|Golgi stack|lipid particle|integral component of membrane|	phospholipid metabolic process|platelet activating factor biosynthetic process|phosphatidylcholine acyl-chain remodeling|phosphatidylcholine acyl-chain remodeling|small molecule metabolic process|glycerophospholipid biosynthetic process|membrane organization|	1-acylglycerol-3-phosphate O-acyltransferase activity|calcium ion binding|1-acylglycerophosphocholine O-acyltransferase activity|1-acylglycerophosphocholine O-acyltransferase activity|1-alkylglycerophosphocholine O-acetyltransferase activity|	9	5	8.92	9	5.18	4.36	5.04	12.9	0.00311	1.93	9.97	0
ENSG00000132963	POMP	proteasome maturation protein	proteasome complex|nucleus|endoplasmic reticulum|cytosol|organelle membrane|	proteasome assembly|	protein binding|	10	4.56	7.42	10	3.72	5.96	3.8	12.9	0.00311	1.59	6.9	0
ENSG00000123143	PKN1	protein kinase N1	nucleus|cytoplasm|endosome|plasma membrane|cytoplasmic membrane-bounded vesicle|midbody|cleavage furrow|	transcription, DNA-templated|regulation of transcription from RNA polymerase II promoter|regulation of transcription from RNA polymerase II promoter|protein phosphorylation|hyperosmotic response|signal transduction|activation of JUN kinase activity|epithelial cell migration|histone H3-T11 phosphorylation|regulation of cell motility|	chromatin binding|protein kinase activity|protein serine/threonine kinase activity|protein kinase C activity|protein kinase C binding|protein binding|ATP binding|GTP-Rho binding|ligand-dependent nuclear receptor transcription coactivator activity|ligand-dependent nuclear receptor transcription coactivator activity|histone kinase activity (H3-T11 specific)|histone binding|histone deacetylase bindi…	10	3.46	7.66	10	4.27	5.69	3.48	12.8	0.00313	1.58	6.73	0
ENSG00000197296	FITM2	fat storage-inducing transmembrane protein 2	mitochondrion|endoplasmic reticulum membrane|integral component of endoplasmic reticulum membrane|	cytoskeleton organization|regulation of triglyceride biosynthetic process|positive regulation of sequestering of triglyceride|regulation of cell morphogenesis|lipid particle organization|cellular triglyceride homeostasis|	molecular_function|	10	3.9	7.71	10	4.21	5.49	3.92	12.8	0.00313	1.96	7.97	0
ENSG00000090863	GLG1	golgi glycoprotein 1	Golgi membrane|Golgi apparatus|plasma membrane|membrane|integral component of membrane|extracellular matrix|extracellular vesicular exosome|	blood coagulation|negative regulation of protein processing|negative regulation of transforming growth factor beta receptor signaling pathway|regulation of chondrocyte differentiation|leukocyte migration|bone morphogenesis|	receptor binding|	10	-1.51	5.48	10	-2.04	7.79	-1.86	12.7	0.00315	-4.35	-0.63	0
ENSG00000183704	SLC9B1P1	solute carrier family 9, subfamily B (NHA1, cation proton antiporter 1), member 1 pseudogene 1	integral component of membrane|	hydrogen ion transmembrane transport|	solute:proton antiporter activity|	8	-1	0.959	9	-4.99	14.4	-4.79	12.7	0.00315	-11.1	-1.14	0
ENSG00000116237	ICMT	isoprenylcysteine carboxyl methyltransferase	endoplasmic reticulum|endoplasmic reticulum membrane|membrane|integral component of membrane|	in utero embryonic development|liver development|cellular protein modification process|C-terminal protein methylation|protein targeting to membrane|positive regulation of cell proliferation|multicellular organism growth|regulation of Ras protein signal transduction|regulation of RNA biosynthetic process|	protein C-terminal carboxyl O-methyltransferase activity|protein C-terminal S-isoprenylcysteine carboxyl O-methyltransferase activity|cAMP response element binding protein binding|	10	-0.94	1.56	10	-2.68	13.1	-2.28	12.7	0.00315	-5.42	-0.8	0
ENSG00000110171	TRIM3	tripartite motif containing 3	cytoplasm|early endosome|	nervous system development|protein transport|	protein binding|protein C-terminus binding|zinc ion binding|	10	7.95	6.39	10	8	6.71	7.98	12.7	0.00315	2.31	15	0
ENSG00000183011	LSMD1	N/A	None	None	None	10	2.78	6.89	10	3.2	6.12	2.91	12.6	0.00318	1.26	6.11	0
ENSG00000080839	RBL1	retinoblastoma-like 1	nucleus|nucleoplasm|transcription factor complex|	negative regulation of transcription from RNA polymerase II promoter|mitotic cell cycle|transcription, DNA-templated|transcription initiation from RNA polymerase II promoter|transforming growth factor beta receptor signaling pathway|gene expression|viral process|chromatin modification|regulation of lipid kinase activity|positive regulation of transcription from RNA polymerase II promoter|regulati…	protein binding|transcription factor binding|	10	2.99	7.82	10	2.64	5.19	2.91	12.6	0.00318	1.23	5.98	0
ENSG00000204683	C10ORF113	chromosome 10 open reading frame 113	None	None	None	10	2.97	6.09	10	3.29	6.82	3.15	12.5	0.0032	1.46	5.4	0
ENSG00000183060	LYSMD4	LysM, putative peptidoglycan-binding, domain containing 4	integral component of membrane|	None	None	10	5.8	8.61	10	7.5	5	6.03	12.5	0.0032	2.31	11.8	0
ENSG00000132589	FLOT2	flotillin 2	acrosomal membrane|endosome|plasma membrane|caveola|membrane|flotillin complex|endocytic vesicle|vesicle|perinuclear region of cytoplasm|extracellular vesicular exosome|	cell adhesion|epidermis development|negative regulation of gene expression|protein stabilization|establishment of protein localization to plasma membrane|negative regulation of amyloid precursor protein catabolic process|	protein binding|ionotropic glutamate receptor binding|	10	2.87	5.79	10	3.56	7.4	3.19	12.5	0.0032	1.21	5.77	0
ENSG00000179772	FOXS1	forkhead box S1	nucleus|	blood vessel development|transcription from RNA polymerase II promoter|positive regulation of multicellular organism growth|negative regulation of sequence-specific DNA binding transcription factor activity|negative regulation of transcription, DNA-templated|neuromuscular process controlling balance|	DNA binding|sequence-specific DNA binding transcription factor activity|sequence-specific DNA binding|	10	4.95	7.86	10	2.76	5.64	3.77	12.4	0.00322	1.52	7.19	0
ENSG00000179029	TMEM107	transmembrane protein 107	cellular_component|integral component of membrane|	biological_process|neural tube patterning|cilium assembly|embryonic digit morphogenesis|	molecular_function|	9	6.12	4.77	10	7.82	8.53	6.98	12.4	0.00322	4.02	13.9	0
ENSG00000177201	OR2T12	olfactory receptor, family 2, subfamily T, member 12	plasma membrane|integral component of membrane|	G-protein coupled receptor signaling pathway|detection of chemical stimulus involved in sensory perception of smell|	G-protein coupled receptor activity|olfactory receptor activity|	10	4.84	6.92	10	3.45	6.39	4.44	12.4	0.00322	1.78	7.59	0
ENSG00000143418	CERS2	ceramide synthase 2	endoplasmic reticulum|endoplasmic reticulum membrane|membrane|integral component of membrane|nuclear membrane|	regulation of transcription, DNA-templated|sphingolipid metabolic process|sphingolipid biosynthetic process|small molecule metabolic process|ceramide biosynthetic process|	sequence-specific DNA binding transcription factor activity|protein binding|sequence-specific DNA binding|sphingosine N-acyltransferase activity|	10	3.46	6.75	10	3.09	6.1	3.22	12.4	0.00322	1.42	5.94	0
ENSG00000116679	IVNS1ABP	influenza virus NS1A binding protein	nucleoplasm|transcription factor complex|spliceosomal complex|cytoplasm|cytoskeleton|	transcription from RNA polymerase III promoter|RNA splicing|response to virus|viral process|negative regulation of intrinsic apoptotic signaling pathway|	None	10	3.6	5.91	10	3.65	6.8	3.6	12.3	0.00326	1.44	6.59	0
ENSG00000204435	CSNK2B	casein kinase 2, beta polypeptide	nucleus|cytoplasm|cytosol|plasma membrane|protein kinase CK2 complex|PcG protein complex|extracellular vesicular exosome|	mitotic cell cycle|protein phosphorylation|signal transduction|axon guidance|negative regulation of cell proliferation|positive regulation of pathway-restricted SMAD protein phosphorylation|Wnt signaling pathway|positive regulation of activin receptor signaling pathway|adiponectin-activated signaling pathway|negative regulation of blood vessel endothelial cell migration|cellular protein complex a…	protein serine/threonine kinase activity|receptor binding|protein binding|transcription factor binding|protein kinase regulator activity|protein domain specific binding|identical protein binding|metal ion binding|	5	5.91	5.37	7	5.63	7.29	5.71	12.3	0.00326	2.23	11.1	0
ENSG00000213648	SULT1A4	sulfotransferase family, cytosolic, 1A, phenol-preferring, member 4	cytoplasm|cytosol|	catecholamine metabolic process|xenobiotic metabolic process|xenobiotic metabolic process|activation of signaling protein activity involved in unfolded protein response|steroid metabolic process|flavonoid metabolic process|endoplasmic reticulum unfolded protein response|cellular protein metabolic process|small molecule metabolic process|3'-phosphoadenosine 5'-phosphosulfate metabolic process|sulf…	aryl sulfotransferase activity|sulfotransferase activity|	10	3.6	9.09	10	2.33	4.43	3.03	12.3	0.00326	1.29	5.86	0
ENSG00000158480	SPATA2	spermatogenesis associated 2	nucleus|nucleolus|cytoplasm|	multicellular organismal development|spermatogenesis|cell differentiation|	molecular_function|	9	4.03	9.35	9	3.13	3.46	3.85	12.3	0.00326	1.5	6.94	0
ENSG00000133961	NUMB	numb homolog (Drosophila)	nucleus|early endosome|plasma membrane|integral component of plasma membrane|basolateral plasma membrane|extrinsic component of plasma membrane|apical part of cell|	Notch signaling pathway|axon guidance|lateral ventricle development|neuroblast division in subventricular zone|positive regulation of polarized epithelial cell differentiation|adherens junction organization|negative regulation of Notch signaling pathway|positive regulation of neurogenesis|lung epithelial cell differentiation|	protein binding|beta-catenin binding|alpha-catenin binding|cadherin binding|	10	-1.66	7.1	10	-1.59	5.56	-1.63	12.3	0.00326	-3.41	-0.56	0
ENSG00000115607	IL18RAP	interleukin 18 receptor accessory protein	integral component of membrane|	inflammatory response|immune response|cell surface receptor signaling pathway|	receptor activity|	10	6.29	8.59	10	6.8	4.05	6.65	12.2	0.00329	2.72	12.2	0
ENSG00000198799	LRIG2	leucine-rich repeats and immunoglobulin-like domains 2	cytoplasm|plasma membrane|integral component of membrane|	None	None	10	7.55	9.51	10	7.55	3.03	7.55	12.2	0.00329	3.4	14.3	0
ENSG00000198369	SPRED2	sprouty-related, EVH1 domain containing 2	nucleus|cytoplasm|plasma membrane|transport vesicle membrane|	inactivation of MAPK activity|multicellular organismal development|negative regulation of peptidyl-threonine phosphorylation|positive regulation of DNA damage response, signal transduction by p53 class mediator|regulation of protein deacetylation|	stem cell factor receptor binding|protein binding|protein kinase binding|protein serine/threonine kinase inhibitor activity|	10	4.09	7.49	10	3.98	5.09	4.06	12.2	0.00329	1.53	7.07	0
ENSG00000172115	CYCS	cytochrome c, somatic	protein phosphatase type 2A complex|nucleus|mitochondrion|mitochondrial inner membrane|mitochondrial intermembrane space|cytosol|cytosol|respiratory chain|	apoptotic DNA fragmentation|apoptotic process|activation of cysteine-type endopeptidase activity involved in apoptotic process by cytochrome c|dephosphorylation|respiratory electron transport chain|cellular metabolic process|small molecule metabolic process|cellular respiration|intrinsic apoptotic signaling pathway|	protein serine/threonine phosphatase activity|iron ion binding|protein binding|heme binding|electron transporter, transferring electrons from CoQH2-cytochrome c reductase complex and cytochrome c oxidase complex activity|	1	0	0	5	7.97	13	7.93	12.2	0.00329	5.11	15.7	0
ENSG00000204850	AC011484.1	N/A	None	None	None	10	5.33	7.61	10	4.51	5.14	5.08	12.2	0.00329	2.18	8.88	0
ENSG00000204482	LST1	leukocyte specific transcript 1	Golgi membrane|cytoplasm|Golgi apparatus|integral component of membrane|	cell morphogenesis|immune response|regulation of cell shape|anatomical structure morphogenesis|dendrite development|negative regulation of lymphocyte proliferation|	None	10	8.31	5.76	8	9.17	6.88	9	12.2	0.00329	4.59	17.6	0
ENSG00000138942	RNF185	ring finger protein 185	mitochondrial outer membrane|endoplasmic reticulum membrane|integral component of membrane|	autophagy|protein ubiquitination|	zinc ion binding|ligase activity|	9	-1.59	5.43	9	-1.97	7.28	-1.83	12.2	0.00329	-4.3	-0.62	0
ENSG00000205809	KLRC2	killer cell lectin-like receptor subfamily C, member 2	plasma membrane|integral component of plasma membrane|	cellular defense response|signal transduction|innate immune response|	transmembrane signaling receptor activity|protein binding|carbohydrate binding|	10	4.33	7.97	10	6.71	4.99	4.39	12.1	0.00333	1.85	10.2	0
ENSG00000180245	RRH	retinal pigment epithelium-derived rhodopsin homolog	integral component of plasma membrane|	G-protein coupled receptor signaling pathway|visual perception|phototransduction|protein-chromophore linkage|	G-protein coupled receptor activity|photoreceptor activity|	10	4.96	8.59	9	3.63	4.08	4.71	12.1	0.00333	1.91	8.18	0
ENSG00000007541	PIGQ	phosphatidylinositol glycan anchor biosynthesis, class Q	glycosylphosphatidylinositol-N-acetylglucosaminyltransferase (GPI-GnT) complex|endoplasmic reticulum membrane|integral component of membrane|	carbohydrate metabolic process|C-terminal protein lipidation|preassembly of GPI anchor in ER membrane|post-translational protein modification|cellular protein metabolic process|	phosphatidylinositol N-acetylglucosaminyltransferase activity|	10	9.25	10.4	10	6.34	2.74	8.39	12.1	0.00333	4.03	17.3	0
ENSG00000147130	ZMYM3	zinc finger, MYM-type 3	nucleus|	cytoskeleton organization|multicellular organismal development|regulation of cell morphogenesis|	DNA binding|zinc ion binding|	10	-1.58	7.85	10	-1.48	4.6	-1.54	12.1	0.00333	-3.39	-0.52	0
ENSG00000165527	ARF6	ADP-ribosylation factor 6	ruffle|endosome|endosome|early endosome|Golgi apparatus|plasma membrane|cell cortex|membrane|endocytic vesicle|midbody|filopodium membrane|cleavage furrow|recycling endosome membrane|extracellular vesicular exosome|	liver development|GTP catabolic process|cellular component movement|cell cycle|cell adhesion|small GTPase mediated signal transduction|protein transport|vesicle-mediated transport|positive regulation of actin filament polymerization|cortical actin cytoskeleton organization|ruffle organization|myeloid cell apoptotic process|protein localization to cell surface|regulation of Rac protein signal tran…	GTPase activity|protein binding|GTP binding|thioesterase binding|	10	4.02	5.11	10	3.71	7.4	3.8	12.1	0.00333	1.68	7.07	0
ENSG00000211584	SLC48A1	solute carrier family 48 (heme transporter), member 1	lysosomal membrane|endosome membrane|integral component of membrane|	heme transport|	heme transporter activity|	10	7.48	9.13	10	6.37	3.37	6.31	12.1	0.00333	1.75	12.6	0
ENSG00000060237	WNK1	WNK lysine deficient protein kinase 1	cytoplasm|	positive regulation of systemic arterial blood pressure|protein phosphorylation|negative regulation of protein kinase activity|ion transport|negative regulation of phosphatase activity|peptidyl-threonine phosphorylation|intracellular signal transduction|intracellular signal transduction|neuron development|regulation of cellular process|negative regulation of pancreatic juice secretion|	protein serine/threonine kinase activity|protein serine/threonine kinase activity|protein kinase inhibitor activity|protein binding|ATP binding|chloride channel inhibitor activity|phosphatase binding|	10	5.03	7.21	10	3.53	5.51	4.97	12.1	0.00333	1.81	10.2	0
ENSG00000181090	EHMT1	euchromatic histone-lysine N-methyltransferase 1	nucleus|nucleus|nucleus|nucleoplasm|chromosome|cytoplasm|plasma membrane|	negative regulation of transcription from RNA polymerase II promoter|DNA methylation|embryo development|chromatin modification|histone methylation|peptidyl-lysine monomethylation|peptidyl-lysine dimethylation|negative regulation of transcription, DNA-templated|histone H3-K9 methylation|histone H3-K27 methylation|	p53 binding|protein binding|methyltransferase activity|zinc ion binding|protein-lysine N-methyltransferase activity|histone-lysine N-methyltransferase activity|histone methyltransferase activity (H3-K9 specific)|histone methyltransferase activity (H3-K27 specific)|	9	-1.56	4.1	9	-1.94	8.49	-1.8	12.1	0.00333	-4.26	-0.65	0
ENSG00000149932	TMEM219	transmembrane protein 219	plasma membrane|integral component of membrane|	apoptotic process|	None	10	4.78	9.36	10	3.31	3.89	4.36	12	0.00336	1.88	7.67	0
ENSG00000173638	SLC19A1	solute carrier family 19 (folate transporter), member 1	plasma membrane|integral component of plasma membrane|membrane|	vitamin metabolic process|water-soluble vitamin metabolic process|folic acid transport|small molecule metabolic process|folic acid metabolic process|methotrexate transport|	folic acid binding|folic acid transporter activity|methotrexate transporter activity|	9	-2.96	12	10	-1.18	1.3	-2.54	12	0.00336	-7.1	-0.93	0
ENSG00000115091	ACTR3	ARP3 actin-related protein 3 homolog (yeast)	Golgi membrane|podosome|cytosol|Arp2/3 protein complex|actin cytoskeleton|membrane|lamellipodium|hemidesmosome|excitatory synapse|extracellular vesicular exosome|	cellular component movement|establishment or maintenance of cell polarity|asymmetric cell division|response to carbohydrate|positive regulation of lamellipodium assembly|positive regulation of actin filament polymerization|meiotic cytokinesis|Fc-gamma receptor signaling pathway involved in phagocytosis|regulation of myosin II filament organization|innate immune response|positive regulation of neu…	actin binding|protein binding|ATP binding|	10	3.68	4.35	10	6.36	8.47	4.2	12	0.00336	1.42	9.22	0
ENSG00000074276	CDHR2	cadherin-related family member 2	integral component of membrane|apical plasma membrane|cell junction|extracellular vesicular exosome|	cell adhesion|homophilic cell adhesion|negative regulation of cell growth|	calcium ion binding|protein binding|	10	4.18	7.73	10	4.07	4.67	4.16	12	0.00336	1.69	7.55	0
ENSG00000063127	SLC6A16	solute carrier family 6, member 16	intracellular|integral component of membrane|	neurotransmitter transport|transmembrane transport|	neurotransmitter transporter activity|neurotransmitter:sodium symporter activity|	10	2.61	2.15	10	4.93	10.6	3.42	12	0.00336	1.46	7.73	0
ENSG00000167323	STIM1	stromal interaction molecule 1	endoplasmic reticulum|endoplasmic reticulum membrane|microtubule|integral component of plasma membrane|integral component of endoplasmic reticulum membrane|growth cone|cortical endoplasmic reticulum|	store-operated calcium entry|detection of calcium ion|blood coagulation|activation of store-operated calcium channel activity|regulation of calcium ion transport|calcium ion transmembrane transport|regulation of store-operated calcium entry|	calcium channel regulator activity|calcium ion binding|protein binding|store-operated calcium channel activity|identical protein binding|microtubule plus-end binding|	10	4.64	9.07	10	5.58	3.26	5.57	12	0.00336	1.89	9.69	0
ENSG00000044012	GUCA2B	guanylate cyclase activator 2B (uroguanylin)	extracellular vesicular exosome|	cGMP biosynthetic process|excretion|body fluid secretion|positive regulation of guanylate cyclase activity|negative regulation of blood pressure|	calcium sensitive guanylate cyclase activator activity|	9	4.05	5.31	9	3.34	7.12	3.86	11.9	0.00341	1.58	6.85	0
ENSG00000139567	ACVRL1	activin A receptor type II-like 1	integral component of plasma membrane|cell surface|dendrite|neuronal cell body|	angiogenesis|in utero embryonic development|regulation of endothelial cell proliferation|negative regulation of endothelial cell proliferation|positive regulation of endothelial cell proliferation|lymphangiogenesis|blood vessel maturation|blood vessel remodeling|blood vessel endothelial cell proliferation involved in sprouting angiogenesis|regulation of DNA replication|regulation of transcription…	protein serine/threonine kinase activity|transmembrane receptor protein serine/threonine kinase activity|receptor signaling protein serine/threonine kinase activity|transforming growth factor beta-activated receptor activity|transforming growth factor beta receptor activity, type I|protein binding|ATP binding|activin receptor activity, type I|activin receptor activity, type I|protein kinase bindi…	9	-2.65	11.8	9	-1.23	1.33	-2.19	11.9	0.00341	-6.28	-0.7	0
ENSG00000135211	TMEM60	transmembrane protein 60	integral component of membrane|	None	None	10	6.34	4.83	9	5.31	7.76	5.89	11.9	0.00341	2.63	10.9	0
ENSG00000268466	AL132989.1	N/A	None	None	None	6	-1.02	1.19	6	-3.94	12.8	-3.68	11.9	0.00341	-9.25	-1.41	0
ENSG00000185686	PRAME	preferentially expressed antigen in melanoma	nucleus|plasma membrane|	transcription, DNA-templated|apoptotic process|positive regulation of cell proliferation|cell differentiation|regulation of growth|negative regulation of apoptotic process|negative regulation of cell differentiation|negative regulation of transcription, DNA-templated|negative regulation of retinoic acid receptor signaling pathway|	protein binding|retinoic acid receptor binding|	10	3.95	7.47	10	2.86	5.28	3.22	11.9	0.00341	1.25	6.71	0
ENSG00000104903	LYL1	lymphoblastic leukemia associated hematopoiesis regulator 1	nucleus|	blood vessel maturation|transcription, DNA-templated|regulation of transcription, DNA-templated|B cell differentiation|positive regulation of transcription, DNA-templated|definitive hemopoiesis|	DNA binding|protein binding|protein dimerization activity|	10	4.61	5.6	10	4.7	6.67	4.65	11.9	0.00341	1.39	8.93	0
ENSG00000188211	NCR3LG1	natural killer cell cytotoxicity receptor 3 ligand 1	plasma membrane|integral component of membrane|viral capsid|	None	structural molecule activity|	10	7.75	7.69	10	3.51	5.51	4.71	11.9	0.00341	1.6	10.9	0
ENSG00000163814	CDCP1	CUB domain containing protein 1	extracellular region|plasma membrane|integral component of membrane|	None	None	10	2.82	2.54	10	4.68	9.84	4.65	11.8	0.00345	1.59	8.44	0
ENSG00000177697	CD151	CD151 molecule (Raph blood group)	cytosol|plasma membrane|integral component of plasma membrane|membrane|	cell adhesion|cell migration|extracellular matrix organization|hemidesmosome assembly|cell junction assembly|T cell proliferation|	protein binding|	10	4.92	4.99	10	4.53	7.19	4.71	11.8	0.00345	1.55	9.2	0
ENSG00000159692	CTBP1	C-terminal binding protein 1	nucleus|nucleus|transcription factor complex|cytosol|transcriptional repressor complex|transcriptional repressor complex|	negative regulation of transcription from RNA polymerase II promoter|transcription, DNA-templated|protein phosphorylation|Golgi organization|negative regulation of cell proliferation|viral genome replication|positive regulation of histone deacetylation|regulation of transcription by chromatin organization|negative regulation of histone acetylation|negative regulation of transcription, DNA-templat…	RNA polymerase II transcription corepressor activity|sequence-specific DNA binding transcription factor activity|protein binding|protein C-terminus binding|transcription factor binding|oxidoreductase activity, acting on the CH-OH group of donors, NAD or NADP as acceptor|protein domain specific binding|protein domain specific binding|protein homodimerization activity|NAD binding|repressing transcr…	9	-0.18	0.0222	9	-3.1	13.9	-2.94	11.8	0.00345	-6.93	-1.01	0
ENSG00000174938	SEZ6L2	seizure related 6 homolog (mouse)-like 2	endoplasmic reticulum membrane|plasma membrane|integral component of membrane|neuronal cell body|	adult locomotory behavior|cerebellar Purkinje cell layer development|synapse maturation|regulation of protein kinase C signaling|	None	10	6.71	3.76	10	3.73	8.74	3.8	11.7	0.00349	1.2	8.16	0
ENSG00000101306	MYLK2	myosin light chain kinase 2	nucleus|cytoplasm|sarcomere|	striated muscle contraction|neuromuscular synaptic transmission|positive regulation of gene expression|skeletal muscle satellite cell differentiation|peptidyl-threonine phosphorylation|regulation of muscle filament sliding|skeletal muscle cell differentiation|protein autophosphorylation|cardiac muscle tissue morphogenesis|cardiac muscle contraction|	calmodulin-dependent protein kinase activity|myosin light chain kinase activity|myosin light chain kinase activity|protein binding|calmodulin binding|calmodulin binding|ATP binding|	9	2.74	5.5	9	2.69	6.54	2.74	11.7	0.00349	1.25	5.37	0
ENSG00000155304	HSPA13	heat shock protein 70kDa family, member 13	endoplasmic reticulum|intracellular membrane-bounded organelle|extracellular vesicular exosome|	None	ATP binding|	10	-1.38	3.72	10	-2.65	8.9	-2.24	11.6	0.00353	-5.28	-0.7	0
ENSG00000181458	TMEM45A	transmembrane protein 45A	integral component of membrane|	None	None	10	0	0	9	6.75	14.4	6.66	11.6	0.00353	3.21	13.8	0
ENSG00000108474	PIGL	phosphatidylinositol glycan anchor biosynthesis, class L	endoplasmic reticulum membrane|integral component of membrane|	C-terminal protein lipidation|GPI anchor biosynthetic process|preassembly of GPI anchor in ER membrane|post-translational protein modification|cellular protein metabolic process|	N-acetylglucosaminylphosphatidylinositol deacetylase activity|	10	-1.66	6.75	10	-1.52	5.22	-1.59	11.6	0.00353	-3.53	-0.51	0
ENSG00000107223	EDF1	endothelial differentiation-related factor 1	intracellular|nucleus|nucleus|nucleus|transcription factor TFIID complex|nucleolus|cytoplasm|cytoplasm|extracellular vesicular exosome|	transcription, DNA-templated|regulation of transcription, DNA-templated|multicellular organismal development|regulation of lipid metabolic process|positive regulation of DNA binding|endothelial cell differentiation|positive regulation of transcription, DNA-templated|	transcription coactivator activity|protein binding|calmodulin binding|sequence-specific DNA binding|poly(A) RNA binding|	10	3.84	6.69	10	2.44	5.87	3.18	11.6	0.00353	1.11	6.68	0
ENSG00000169860	P2RY1	purinergic receptor P2Y, G-protein coupled, 1	plasma membrane|plasma membrane|integral component of plasma membrane|basolateral plasma membrane|apical plasma membrane|dendrite|cell body|postsynaptic membrane|neuronal postsynaptic density|	positive regulation of protein phosphorylation|adenosine receptor signaling pathway|cell surface receptor signaling pathway|G-protein coupled receptor signaling pathway|adenylate cyclase-inhibiting G-protein coupled receptor signaling pathway|phospholipase C-activating G-protein coupled receptor signaling pathway|positive regulation of cytosolic calcium ion concentration|brain development|aging|b…	receptor activity|protein binding|ATP binding|A1 adenosine receptor binding|ADP binding|G-protein coupled purinergic nucleotide receptor activity|ATP-activated nucleotide receptor activity|ADP-activated nucleotide receptor activity|protein heterodimerization activity|scaffold protein binding|	10	-1.91	7.99	10	-4.33	6.16	-3.49	11.6	0.00353	-7.86	-0.78	0
ENSG00000136715	SAP130	Sin3A-associated protein, 130kDa	nucleus|STAGA complex|	negative regulation of transcription from RNA polymerase II promoter|chromatin organization|transcription, DNA-templated|histone H3 acetylation|	transcription coactivator activity|histone acetyltransferase activity|	10	5.25	7.45	10	2.92	6.08	4.08	11.6	0.00353	1.48	7.92	0
ENSG00000180543	TSPYL5	TSPY-like 5	nucleus|	nucleosome assembly|positive regulation of cell proliferation|positive regulation of cell proliferation|positive regulation of protein ubiquitination|regulation of growth|positive regulation of protein kinase B signaling|cellular response to gamma radiation|	protein binding|	10	4.73	7.94	10	5.16	4.02	4.9	11.5	0.00357	2.19	9.12	0
ENSG00000125970	RALY	RALY heterogeneous nuclear ribonucleoprotein	nucleus|catalytic step 2 spliceosome|	mRNA splicing, via spliceosome|	nucleotide binding|RNA binding|protein binding|poly(A) RNA binding|	10	6.98	6.56	10	4.67	5.66	5.05	11.5	0.00357	1.69	10.5	0
ENSG00000256671	LIMS3L	LIM and senescent cell antigen-like domains 3-like	None	None	zinc ion binding|	10	3.35	5.83	10	3.16	6.1	3.29	11.5	0.00357	1.17	6.18	0
ENSG00000036257	CUL3	cullin 3	Golgi membrane|nucleus|polar microtubule|membrane|Cul3-RING ubiquitin ligase complex|extracellular vesicular exosome|	G1/S transition of mitotic cell cycle|mitotic anaphase|protein polyubiquitination|cytokinesis|trophectodermal cellular morphogenesis|protein monoubiquitination|ER to Golgi vesicle-mediated transport|cell cycle arrest|integrin-mediated signaling pathway|gastrulation|cyclin catabolic process|positive regulation of cell proliferation|Wnt signaling pathway|cell migration|protein ubiquitination|stem c…	ubiquitin-protein transferase activity|protein binding|cyclin binding|POZ domain binding|ubiquitin protein ligase binding|	10	3.17	2.35	9	3.74	9.54	3.6	11.5	0.00357	1.53	7.36	0
ENSG00000134318	ROCK2	Rho-associated, coiled-coil containing protein kinase 2	nucleus|centrosome|cytosol|plasma membrane|spindle pole centrosome|cytoplasmic ribonucleoprotein granule|	cytokinesis|neural tube closure|protein phosphorylation|smooth muscle contraction|axon guidance|extrinsic apoptotic signaling pathway via death domain receptors|positive regulation of centrosome duplication|negative regulation of angiogenesis|actin cytoskeleton organization|regulation of cell adhesion|regulation of actin cytoskeleton organization|intracellular signal transduction|regulation of ci…	protein serine/threonine kinase activity|structural molecule activity|protein binding|ATP binding|Rho GTPase binding|poly(A) RNA binding|metal ion binding|	10	-1.39	4.32	10	-2.1	7.83	-1.83	11.4	0.0036	-4.03	-0.55	0
ENSG00000105063	PPP6R1	protein phosphatase 6, regulatory subunit 1	cytoplasm|	regulation of phosphoprotein phosphatase activity|	protein binding|protein phosphatase binding|	9	2.85	6.5	10	2.56	5.31	2.75	11.4	0.0036	1.12	5.67	0
ENSG00000113205	PCDHB3	protocadherin beta 3	integral component of plasma membrane|integral component of membrane|	cell adhesion|homophilic cell adhesion|synaptic transmission|nervous system development|synapse assembly|calcium-dependent cell-cell adhesion|	calcium ion binding|	10	3.96	4.14	10	3.78	7.67	3.86	11.4	0.0036	1.58	8.51	0
ENSG00000205323	SARNP	SAP domain containing ribonucleoprotein	transcription export complex|nucleus|nucleus|nuclear speck|intracellular membrane-bounded organelle|	transcription, DNA-templated|regulation of transcription, DNA-templated|mRNA export from nucleus|regulation of translation|	DNA binding|poly(A) RNA binding|	10	4.82	7.15	10	4.09	4.73	4.41	11.4	0.0036	1.94	7.87	0
ENSG00000136867	SLC31A2	solute carrier family 31 (copper transporter), member 2	integral component of plasma membrane|	copper ion transport|copper ion transmembrane transport|	copper ion transmembrane transporter activity|	10	8.09	9.39	9	4.61	3.11	5.6	11.3	0.00364	2.19	13.1	0
ENSG00000243466	IGKV1-5	immunoglobulin kappa variable 1-5	extracellular region|extracellular region|plasma membrane|extracellular vesicular exosome|blood microparticle|	immune response|complement activation|complement activation, classical pathway|Fc-epsilon receptor signaling pathway|Fc-gamma receptor signaling pathway involved in phagocytosis|innate immune response|regulation of immune response|	antigen binding|	9	2.92	4.15	9	3.64	7.69	3.45	11.3	0.00364	1.33	6.35	0
ENSG00000168214	RBPJ	recombination signal binding protein for immunoglobulin kappa J region	MAML1-RBP-Jkappa- ICN1 complex|nucleus|nucleoplasm|transcription factor complex|nucleolus|cytoplasm|	negative regulation of transcription from RNA polymerase II promoter|negative regulation of transcription from RNA polymerase II promoter|angiogenesis|epithelial to mesenchymal transition|blood vessel remodeling|inflammatory response to antigenic stimulus|outflow tract morphogenesis|endocardium morphogenesis|epithelial to mesenchymal transition involved in endocardial cushion formation|cardiac le…	recombinase activity|RNA polymerase II core promoter proximal region sequence-specific DNA binding|RNA polymerase II core promoter sequence-specific DNA binding|RNA polymerase II core promoter proximal region sequence-specific DNA binding transcription factor activity involved in positive regulation of transcription|RNA polymerase II repressing transcription factor binding|DNA binding|chromatin b…	10	3.31	4.68	10	3.05	7.04	3.13	11.3	0.00364	1.2	6.56	0
ENSG00000050820	BCAR1	breast cancer anti-estrogen resistance 1	ruffle|nucleolus|cytoplasm|cytosol|plasma membrane|plasma membrane|focal adhesion|focal adhesion|lamellipodium|	regulation of cell growth|actin filament organization|cell adhesion|epidermal growth factor receptor signaling pathway|G-protein coupled receptor signaling pathway|G-protein coupled receptor signaling pathway|integrin-mediated signaling pathway|blood coagulation|cell proliferation|insulin receptor signaling pathway|positive regulation of endothelial cell migration|cell migration|platelet activati…	signal transducer activity|protein binding|SH3 domain binding|protein kinase binding|	10	-1.22	1.46	10	-2.1	10.5	-1.83	11.3	0.00364	-4.55	-0.62	0
ENSG00000173692	PSMD1	proteasome (prosome, macropain) 26S subunit, non-ATPase, 1	proteasome complex|nucleoplasm|cytosol|proteasome regulatory particle|membrane|proteasome accessory complex|extracellular vesicular exosome|	G1/S transition of mitotic cell cycle|protein polyubiquitination|mitotic cell cycle|antigen processing and presentation of peptide antigen via MHC class I|antigen processing and presentation of exogenous peptide antigen via MHC class I, TAP-dependent|regulation of cellular amino acid metabolic process|apoptotic process|DNA damage response, signal transduction by p53 class mediator resulting in ce…	enzyme regulator activity|	7	3.21	5.13	7	3.99	6.69	3.38	11.3	0.00364	1.32	6.99	0
ENSG00000146409	SLC18B1	solute carrier family 18, subfamily B, member 1	integral component of membrane|	transmembrane transport|	None	10	5.1	5.34	10	4.28	6.41	4.35	11.3	0.00364	1.99	9.04	0
ENSG00000091127	PUS7	pseudouridylate synthase 7 (putative)	None	pseudouridine synthesis|tRNA processing|	pseudouridine synthase activity|enzyme binding|poly(A) RNA binding|	10	5.75	11.1	10	2.54	2.97	5.02	11.3	0.00364	2.01	9.46	0
ENSG00000168056	LTBP3	latent transforming growth factor beta binding protein 3	extracellular region|extracellular matrix|extracellular vesicular exosome|	transforming growth factor beta receptor signaling pathway|extracellular matrix organization|negative regulation of bone mineralization|negative regulation of chondrocyte differentiation|transforming growth factor beta activation|positive regulation of bone resorption|bone remodeling|bone morphogenesis|lung saccule development|positive regulation of mesenchymal stem cell proliferation|positive re…	calcium ion binding|transforming growth factor beta binding|	10	3.39	7.97	10	2.45	3.8	3.39	11.3	0.00364	1.1	5.9	0
ENSG00000143786	CNIH3	cornichon family AMPA receptor auxiliary protein 3	cell junction|alpha-amino-3-hydroxy-5-methyl-4-isoxazolepropionic acid selective glutamate receptor complex|dendritic shaft|postsynaptic membrane|	synaptic transmission, glutamatergic|intracellular signal transduction|regulation of membrane potential|regulation of alpha-amino-3-hydroxy-5-methyl-4-isoxazole propionate selective glutamate receptor activity|	channel regulator activity|	10	4.38	4.57	10	4.72	7.14	4.6	11.3	0.00364	1.82	8.3	0
ENSG00000127080	IPPK	inositol 1,3,4,5,6-pentakisphosphate 2-kinase	intracellular|nucleoplasm|cytosol|	inositol phosphate metabolic process|small molecule metabolic process|inositol phosphorylation|	ATP binding|inositol pentakisphosphate 2-kinase activity|	6	4.31	6.13	7	3.76	5.61	3.95	11.3	0.00364	1.59	7.89	0
ENSG00000134256	CD101	CD101 molecule	plasma membrane|integral component of membrane|extracellular vesicular exosome|	cell surface receptor signaling pathway|metabolic process|	hydrolase activity, acting on carbon-nitrogen (but not peptide) bonds, in cyclic amides|	10	4.64	5.55	10	5.4	6.07	5.23	11.2	0.00368	1.93	9.44	0
ENSG00000184166	OR1D2	olfactory receptor, family 1, subfamily D, member 2	plasma membrane|integral component of plasma membrane|	protein import into nucleus, translocation|cellular component movement|chemotaxis|G-protein coupled receptor signaling pathway|single fertilization|sensory perception of smell|detection of chemical stimulus involved in sensory perception of smell|detection of chemical stimulus involved in sensory perception of smell|	G-protein coupled receptor activity|olfactory receptor activity|	10	3.29	7.79	10	3.23	3.79	3.27	11.2	0.00368	1.3	6.53	0
ENSG00000120727	PAIP2	poly(A) binding protein interacting protein 2	cytoplasm|	negative regulation of translational initiation|	protein binding|translation repressor activity|	10	6.08	6.71	10	4.52	5.38	4.85	11.2	0.00368	1.87	9.9	0
ENSG00000198156	NPIPB6	nuclear pore complex interacting protein family, member B6	None	None	None	6	1.01	0.454	6	5.45	12.9	4.62	11.2	0.00368	2.42	10	0
ENSG00000166233	ARIH1	ariadne RBR E3 ubiquitin protein ligase 1	ubiquitin ligase complex|cytoplasm|cytosol|	ubiquitin-dependent protein catabolic process|protein ubiquitination|protein ubiquitination|cytokine-mediated signaling pathway|	ubiquitin-protein transferase activity|protein binding|zinc ion binding|small conjugating protein ligase activity|ubiquitin protein ligase binding|	9	4.3	6.89	8	4.05	4.71	4.08	11.2	0.00368	1.36	8.71	0
ENSG00000144524	COPS7B	COP9 signalosome subunit 7B	nucleus|cytoplasm|COP9 signalosome|	cullin deneddylation|	None	10	5.34	5.06	10	3.61	6.82	4.37	11.2	0.00368	1.51	9.02	0
ENSG00000121807	CCR2	chemokine (C-C motif) receptor 2	cytoplasm|cytosol|plasma membrane|plasma membrane|integral component of plasma membrane|integral component of membrane|dendrite|neuronal cell body|perikaryon|perinuclear region of cytoplasm|	blood vessel remodeling|dendritic cell chemotaxis|positive regulation of T-helper 1 type immune response|negative regulation of type 2 immune response|cellular calcium ion homeostasis|chemotaxis|inflammatory response|immune response|cellular defense response|G-protein coupled receptor signaling pathway|negative regulation of adenylate cyclase activity|positive regulation of cytosolic calcium ion …	chemokine receptor activity|C-C chemokine receptor activity|CCR2 chemokine receptor binding|protein homodimerization activity|	10	4.81	9.83	10	4.11	1.76	4.65	11.1	0.00374	2.13	8.63	0
ENSG00000120008	WDR11	WD repeat domain 11	nucleus|cytoplasm|lysosomal membrane|cilium|membrane|integral component of membrane|	None	protein binding|	10	3.33	8.63	10	2.12	3.56	2.92	11.1	0.00374	1.05	5.58	0
ENSG00000134516	DOCK2	dedicator of cytokinesis 2	cytosol|cytoskeleton|endomembrane system|membrane|extracellular vesicular exosome|	membrane raft polarization|establishment of T cell polarity|immunological synapse formation|myeloid dendritic cell activation involved in immune response|chemotaxis|small GTPase mediated signal transduction|viral process|actin cytoskeleton organization|positive regulation of Rac GTPase activity|macropinocytosis|positive thymic T cell selection|negative thymic T cell selection|alpha-beta T cell pr…	protein binding|Rac GTPase activator activity|Rac guanyl-nucleotide exchange factor activity|T cell receptor binding|	10	-1.72	8.62	10	-1.17	3.05	-1.56	11.1	0.00374	-3.55	-0.48	0
ENSG00000125462	C1ORF61	chromosome 1 open reading frame 61	nucleus|	None	None	10	3.85	5.41	10	4.55	6.13	3.92	11.1	0.00374	1.49	7.62	0
ENSG00000131233	GJA9	gap junction protein, alpha 9, 59kDa	connexon complex|integral component of membrane|	cell communication|	None	10	3.36	6.93	10	3.01	4.58	3.24	11.1	0.00374	1.19	6.03	0
ENSG00000089022	MAPKAPK5	mitogen-activated protein kinase-activated protein kinase 5	nucleus|nucleoplasm|cytoplasm|	MAPK cascade|activation of MAPK activity|regulation of translation|signal transduction|Ras protein signal transduction|negative regulation of TOR signaling|protein autophosphorylation|stress-induced premature senescence|	p53 binding|protein serine/threonine kinase activity|protein serine/threonine kinase activity|MAP kinase kinase activity|protein binding|ATP binding|mitogen-activated protein kinase binding|	9	6.11	5.98	9	6.05	5.38	6.08	11	0.0038	2.67	11.1	0
ENSG00000157399	ARSE	arylsulfatase E (chondrodysplasia punctata 1)	endoplasmic reticulum lumen|Golgi stack|extracellular vesicular exosome|	skeletal system development|sphingolipid metabolic process|glycosphingolipid metabolic process|post-translational protein modification|cellular protein metabolic process|small molecule metabolic process|	arylsulfatase activity|metal ion binding|	10	5.46	7.26	10	3.78	4.7	4.13	11	0.0038	1.34	9.67	0
ENSG00000121210	KIAA0922	KIAA0922	integral component of membrane|	None	None	10	-3.2	9.44	10	-1.26	3.96	-2.13	11	0.0038	-6.62	-0.68	0
ENSG00000173621	LRFN4	leucine rich repeat and fibronectin type III domain containing 4	integral component of membrane|	None	None	10	7.36	5.55	10	4.54	6.95	5.53	10.9	0.00385	2.28	11.5	0
ENSG00000130270	ATP8B3	ATPase, aminophospholipid transporter, class I, type 8B, member 3	acrosomal membrane|endoplasmic reticulum|integral component of membrane|	ATP catabolic process|cation transport|binding of sperm to zona pellucida|phospholipid translocation|	magnesium ion binding|phospholipid-translocating ATPase activity|ATP binding|ATPase activity|cation-transporting ATPase activity|	10	8.63	5.72	10	8.85	5.54	8.7	10.9	0.00385	2.51	16.7	0
ENSG00000139263	LRIG3	leucine-rich repeats and immunoglobulin-like domains 3	extracellular space|plasma membrane|integral component of membrane|cytoplasmic vesicle membrane|	multicellular organismal development|	None	10	7.55	7.98	10	5.71	3.53	7.02	10.9	0.00385	3.56	13.8	0
ENSG00000171282	RP11-1055B8.7	N/A	None	None	None	10	3.7	4.74	10	4.21	6.64	4.06	10.9	0.00385	1.69	7.63	0
ENSG00000183695	MRGPRX2	MAS-related GPR, member X2	plasma membrane|integral component of membrane|	G-protein coupled receptor signaling pathway|sensory perception of pain|sleep|positive regulation of cytokinesis|	G-protein coupled receptor activity|neuropeptide binding|	10	5.53	8.32	10	6.02	2.85	5.9	10.8	0.0039	2.12	12.3	0
ENSG00000080603	SRCAP	Snf2-related CREBBP activator protein	nucleus|Golgi apparatus|protein complex|	transcription, DNA-templated|regulation of transcription from RNA polymerase II promoter|viral process|histone acetylation|	DNA binding|transcription coactivator activity|helicase activity|histone acetyltransferase activity|ATP binding|	8	6.98	4.01	9	7.65	7.29	7.48	10.8	0.0039	1.47	14.1	0
ENSG00000116815	CD58	CD58 molecule	plasma membrane|integral component of plasma membrane|cell surface|membrane|anchored component of membrane|extracellular vesicular exosome|	cell adhesion|blood coagulation|single organismal cell-cell adhesion|heterotypic cell-cell adhesion|leukocyte migration|cellular response to interferon-gamma|cellular response to tumor necrosis factor|positive regulation of interleukin-8 secretion|	receptor binding|protein binding|	10	3	3.08	9	4.84	8.54	3.17	10.8	0.0039	1.19	7.74	0
ENSG00000176302	FOXR1	forkhead box R1	nucleus|	regulation of transcription, DNA-templated|transcription from RNA polymerase II promoter|	sequence-specific DNA binding transcription factor activity|sequence-specific DNA binding|	9	4.27	5.96	8	4.2	5.2	4.26	10.8	0.0039	1.69	8.09	0
ENSG00000268790	CTC-429P9.4	N/A	None	None	None	10	3.76	8.01	10	2.22	3.75	2.99	10.8	0.0039	1.04	6.32	0
ENSG00000163002	NUP35	nucleoporin 35kDa	nucleus|nuclear envelope|nuclear pore|plasma membrane|nuclear membrane|intracellular membrane-bounded organelle|intermediate filament cytoskeleton|	mitotic cell cycle|carbohydrate metabolic process|mitotic nuclear envelope disassembly|hexose transport|regulation of glucose transport|protein transport|glucose transport|viral process|cytokine-mediated signaling pathway|small molecule metabolic process|mRNA transport|transmembrane transport|	None	9	3.54	5.77	9	3.73	5.45	3.68	10.8	0.0039	1.39	7.1	0
ENSG00000170471	RALGAPB	Ral GTPase activating protein, beta subunit (non-catalytic)	None	Ral protein signal transduction|activation of Ral GTPase activity|regulation of exocyst localization|membrane organization|	Ral GTPase activator activity|protein heterodimerization activity|protein heterodimerization activity|	10	5.52	5.08	10	3.78	6.43	5.09	10.8	0.0039	1.84	9.23	0
ENSG00000213066	FGFR1OP	FGFR1 oncogene partner	nucleus|centrosome|cytosol|perinuclear region of cytoplasm|	G2/M transition of mitotic cell cycle|mitotic cell cycle|negative regulation of protein kinase activity|positive regulation of cell proliferation|peptidyl-tyrosine phosphorylation|positive regulation of cell growth|positive regulation of cell migration|microtubule anchoring|negative regulation of protein tyrosine kinase activity|	protein tyrosine kinase activity|protein binding|protein kinase binding|protein tyrosine kinase inhibitor activity|protein homodimerization activity|	8	7.18	5.7	8	4.59	6.07	5.29	10.8	0.0039	1.75	11.6	0
ENSG00000175106	TVP23C	trans-golgi network vesicle protein 23 homolog C (S. cerevisiae)	integral component of membrane|	None	None	10	3.75	4.52	10	4.13	6.69	4.02	10.8	0.0039	1.55	8.17	0
ENSG00000170270	C14ORF142	chromosome 14 open reading frame 142	None	None	None	10	4.44	8.93	10	4.02	2.28	4.32	10.8	0.0039	1.53	7.74	0
ENSG00000178033	FAM26E	family with sequence similarity 26, member E	integral component of membrane|extracellular vesicular exosome|	ion transport|	None	10	5.93	7.11	10	3.42	4.96	4.63	10.7	0.00396	1.67	9.34	0
ENSG00000178802	MPI	mannose phosphate isomerase	cytosol|extracellular vesicular exosome|	dolichol-linked oligosaccharide biosynthetic process|GDP-mannose biosynthetic process|GDP-mannose biosynthetic process|protein N-linked glycosylation via asparagine|post-translational protein modification|cellular protein metabolic process|	mannose-6-phosphate isomerase activity|zinc ion binding|	10	-0.87	2.23	10	-2.2	10.1	-1.63	10.7	0.00396	-4.44	-0.45	0
ENSG00000131067	GGT7	gamma-glutamyltransferase 7	integral component of membrane|anchored component of external side of plasma membrane|	proteolysis|glutathione metabolic process|glutathione biosynthetic process|leukotriene biosynthetic process|	gamma-glutamyltransferase activity|glutathione hydrolase activity|	10	4.77	8.86	10	2.48	2.4	4.71	10.6	0.00401	1.62	8.53	0
ENSG00000211878	TRAJ11	T cell receptor alpha joining 11	None	None	None	6	3.8	8.93	6	2.35	2.15	3.48	10.6	0.00401	1.36	7.76	0
ENSG00000180305	WFDC10A	WAP four-disulfide core domain 10A	extracellular region|	negative regulation of endopeptidase activity|	serine-type endopeptidase inhibitor activity|	10	3.23	4.98	10	3.35	6.03	3.32	10.6	0.00401	1.18	5.96	0
ENSG00000110583	NAA40	N(alpha)-acetyltransferase 40, NatD catalytic subunit	None	lipid metabolic process|	N-acetyltransferase activity|	9	2.52	4.79	9	2.87	6.19	2.68	10.6	0.00401	0.93	5.34	0
ENSG00000198040	ZNF84	zinc finger protein 84	nucleus|	transcription, DNA-templated|regulation of transcription, DNA-templated|	DNA binding|zinc ion binding|	10	2.78	3.73	10	4.24	7.89	3.68	10.6	0.00401	1.28	6.92	0
ENSG00000156599	ZDHHC5	zinc finger, DHHC-type containing 5	plasma membrane|membrane|integral component of membrane|dendrite|	protein palmitoylation|	zinc ion binding|palmitoyltransferase activity|protein-cysteine S-palmitoyltransferase activity|	10	5.46	9.93	10	2.22	2.68	3.29	10.6	0.00401	1.1	8.48	0
ENSG00000158669	AGPAT6	1-acylglycerol-3-phosphate O-acyltransferase 6	endoplasmic reticulum|endoplasmic reticulum|endoplasmic reticulum membrane|membrane|integral component of membrane|	glandular epithelial cell maturation|fatty acid metabolic process|acyl-CoA metabolic process|phospholipid metabolic process|phosphatidic acid biosynthetic process|phosphatidylcholine biosynthetic process|lactation|lipid biosynthetic process|CDP-diacylglycerol biosynthetic process|triglyceride biosynthetic process|triglyceride biosynthetic process|regulation of multicellular organism growth|cellul…	glycerol-3-phosphate O-acyltransferase activity|	10	-2.43	9.86	10	-1	2.11	-1.8	10.6	0.00401	-5.21	-0.5	0
ENSG00000137845	ADAM10	ADAM metallopeptidase domain 10	nucleus|cytoplasm|Golgi apparatus|Golgi-associated vesicle|plasma membrane|cell surface|postsynaptic density|membrane|integral component of membrane|extracellular vesicular exosome|perinuclear endoplasmic reticulum|tetraspanin-enriched microdomain|	in utero embryonic development|protein phosphorylation|membrane protein ectodomain proteolysis|membrane protein ectodomain proteolysis|negative regulation of cell adhesion|negative regulation of cell adhesion|epidermal growth factor receptor signaling pathway|Notch signaling pathway|Notch signaling pathway|Notch receptor processing|integrin-mediated signaling pathway|cell-cell signaling|cell deat…	endopeptidase activity|metalloendopeptidase activity|metalloendopeptidase activity|receptor binding|integrin binding|protein binding|metallopeptidase activity|metallopeptidase activity|metallopeptidase activity|zinc ion binding|SH3 domain binding|protein kinase binding|protein homodimerization activity|	9	-1.05	2.23	10	-2.03	9.25	-1.81	10.6	0.00401	-4.46	-0.55	0
ENSG00000126368	NR1D1	nuclear receptor subfamily 1, group D, member 1	nuclear chromatin|nucleus|nucleoplasm|cytoplasm|dendrite|dendritic spine|	negative regulation of transcription from RNA polymerase II promoter|negative regulation of transcription from RNA polymerase II promoter|glycogen biosynthetic process|transcription initiation from RNA polymerase II promoter|gene expression|proteasomal protein catabolic process|negative regulation of receptor biosynthetic process|regulation of lipid metabolic process|cell differentiation|intracel…	RNA polymerase II core promoter proximal region sequence-specific DNA binding|core promoter sequence-specific DNA binding|RNA polymerase II core promoter proximal region sequence-specific DNA binding transcription factor activity involved in negative regulation of transcription|transcription corepressor binding|transcription corepressor binding|steroid hormone receptor activity|transcription core…	10	3.34	4.88	10	2.52	6.26	2.67	10.5	0.00406	1.06	5.71	0
ENSG00000114209	PDCD10	programmed cell death 10	Golgi membrane|cytosol|plasma membrane|extracellular vesicular exosome|	angiogenesis|apoptotic process|positive regulation of cell proliferation|negative regulation of apoptotic process|positive regulation of MAP kinase activity|	protein binding|protein homodimerization activity|protein N-terminus binding|	10	2.78	5.39	10	4.2	5.84	3.27	10.5	0.00406	1.03	6.51	0
ENSG00000148468	FAM171A1	family with sequence similarity 171, member A1	integral component of membrane|extracellular vesicular exosome|	None	None	10	5.36	2.67	10	6.39	8.28	6.19	10.5	0.00406	2.47	11.9	0
ENSG00000144681	STAC	SH3 and cysteine rich domain	cytosol|	signal transduction|cellular response to heat|intracellular signal transduction|	protein binding|metal ion binding|	10	9.73	6.86	10	6.97	4.69	8.65	10.5	0.00406	2.32	17.5	0
ENSG00000198604	BAZ1A	bromodomain adjacent to zinc finger domain, 1A	nuclear chromosome|CHRAC|ACF complex|	DNA-dependent DNA replication|chromatin remodeling|transcription, DNA-templated|regulation of transcription, DNA-templated|	protein binding|zinc ion binding|	10	-1.88	9.22	8	-1.28	1.79	-1.71	10.5	0.00406	-4.44	-0.47	0
ENSG00000100983	GSS	glutathione synthetase	cytosol|extracellular vesicular exosome|	cellular amino acid metabolic process|glutathione biosynthetic process|glutathione biosynthetic process|xenobiotic metabolic process|response to oxidative stress|nervous system development|aging|response to nutrient levels|response to tumor necrosis factor|response to amino acid|small molecule metabolic process|response to cadmium ion|glutathione derivative biosynthetic process|	magnesium ion binding|glutathione synthase activity|ATP binding|glycine binding|protein homodimerization activity|glutathione binding|	6	7.13	6.36	8	6.75	4.57	7.06	10.5	0.00406	2.35	13.9	0
ENSG00000109854	HTATIP2	HIV-1 Tat interactive protein 2, 30kDa	nucleus|nuclear envelope|cytoplasm|membrane|	angiogenesis|regulation of transcription from RNA polymerase II promoter|apoptotic process|viral process|cell differentiation|negative regulation of apoptotic process|regulation of angiogenesis|nuclear import|oxidation-reduction process|	transcription coactivator activity|protein binding|oxidoreductase activity|	10	-1.62	5.64	9	-1.49	5.24	-1.57	10.5	0.00406	-3.56	-0.42	0
ENSG00000188175	HEPACAM2	HEPACAM family member 2	Golgi membrane|Golgi apparatus|centrosome|spindle|integral component of membrane|midbody|	mitotic nuclear division|centrosome organization|	protein binding|	10	4.05	2.96	10	5.84	7.88	5.11	10.4	0.00412	1.67	10.1	0
ENSG00000154764	WNT7A	wingless-type MMTV integration site family, member 7A	extracellular region|proteinaceous extracellular matrix|extracellular space|endoplasmic reticulum lumen|Golgi lumen|plasma membrane|cell surface|	embryonic axis specification|cartilage condensation|chondrocyte differentiation|neurotransmitter secretion|sex differentiation|asymmetric protein localization|dorsal/ventral pattern formation|skeletal muscle satellite cell activation|skeletal muscle satellite cell maintenance involved in skeletal muscle regeneration|cerebellar granule cell differentiation|cell proliferation in forebrain|central n…	receptor binding|frizzled binding|cytokine activity|receptor agonist activity|receptor agonist activity|	9	-1.41	2.23	9	-5.48	11.3	-4.86	10.4	0.00412	-11.8	-1.27	0
ENSG00000156531	PHF6	PHD finger protein 6	nucleus|nucleoplasm|nucleolus|	transcription, DNA-templated|regulation of transcription, DNA-templated|	DNA binding|protein binding|zinc ion binding|tubulin binding|enzyme binding|histone binding|histone deacetylase binding|ribonucleoprotein complex binding|poly(A) RNA binding|phosphoprotein binding|scaffold protein binding|	10	2.91	3.28	10	3.5	7.57	3.29	10.4	0.00412	1.09	6.46	0
ENSG00000111530	CAND1	cullin-associated and neddylation-dissociated 1	ubiquitin ligase complex|nucleus|cytoplasm|membrane|cullin-RING ubiquitin ligase complex|intracellular membrane-bounded organelle|extracellular vesicular exosome|	SCF complex assembly|protein ubiquitination|cell differentiation|negative regulation of catalytic activity|positive regulation of RNA polymerase II transcriptional preinitiation complex assembly|	protein binding|TBP-class protein binding|	10	2.05	2.92	10	3.71	9.17	3.49	10.4	0.00412	1.07	6.49	0
ENSG00000119686	FLVCR2	feline leukemia virus subgroup C cellular receptor family, member 2	plasma membrane|integral component of membrane|	heme transport|transmembrane transport|	heme transporter activity|heme binding|	10	5.37	8.45	9	5.64	2.29	5.6	10.4	0.00412	2.31	10.9	0
ENSG00000116017	ARID3A	AT rich interactive domain 3A (BRIGHT-like)	nucleus|nucleolus|cytoplasm|Golgi apparatus|membrane raft|	transcription, DNA-templated|positive regulation of transcription from RNA polymerase II promoter|	DNA binding|chromatin binding|sequence-specific DNA binding transcription factor activity|protein binding|protein homodimerization activity|	8	2.62	2.35	8	4.09	8.47	3.74	10.4	0.00412	1.27	7.38	0
ENSG00000139540	SLC39A5	solute carrier family 39 (zinc transporter), member 5	integral component of membrane|basolateral plasma membrane|extracellular vesicular exosome|	zinc ion transport|cellular response to zinc ion starvation|transmembrane transport|neural precursor cell proliferation|G1 to G0 transition involved in cell differentiation|	molecular_function|metal ion transmembrane transporter activity|	10	4.41	6.55	10	6.45	4.62	4.43	10.3	0.00418	1.55	9.98	0
ENSG00000061676	NCKAP1	NCK-associated protein 1	cytosol|integral component of membrane|SCAR complex|lamellipodium membrane|extracellular vesicular exosome|	in utero embryonic development|somitogenesis|neural tube closure|apoptotic process|zygotic determination of anterior/posterior axis, embryo|central nervous system development|endoderm development|mesodermal cell migration|embryonic body morphogenesis|positive regulation of lamellipodium assembly|Rac protein signal transduction|lamellipodium assembly|establishment or maintenance of actin cytoskele…	protein binding|protein complex binding|Rac GTPase binding|	10	3.52	6.38	10	3.47	4.31	3.49	10.3	0.00418	1.23	6.49	0
ENSG00000236882	C5ORF27	chromosome 5 open reading frame 27	None	None	None	10	3.06	0.359	10	-2.64	12.2	-2.31	10.3	0.00418	-6.2	-0.79	0
ENSG00000196159	FAT4	FAT atypical cadherin 4	plasma membrane|integral component of membrane|extracellular vesicular exosome|	homophilic cell adhesion|heterophilic cell-cell adhesion|cerebral cortex development|neurogenesis|hippo signaling|	calcium ion binding|protein binding|	10	4.96	6.07	10	4.03	4.83	4.4	10.3	0.00418	1.71	8.47	0
ENSG00000135314	KHDC1	KH homology domain containing 1	integral component of membrane|	None	RNA binding|	10	6.14	4.46	10	4.84	6.29	4.81	10.3	0.00418	1.83	10.3	0
ENSG00000070770	CSNK2A2	casein kinase 2, alpha prime polypeptide	nucleus|cytosol|PcG protein complex|	mitotic cell cycle|transcription, DNA-templated|regulation of transcription, DNA-templated|protein phosphorylation|apoptotic process|axon guidance|Wnt signaling pathway|mitotic spindle checkpoint|	protein serine/threonine kinase activity|protein binding|ATP binding|protein N-terminus binding|	9	3.77	1.96	10	5.37	8.66	5.32	10.3	0.00418	1.63	10.2	0
ENSG00000196218	RYR1	ryanodine receptor 1 (skeletal)	cytoplasm|smooth endoplasmic reticulum|plasma membrane|integral component of plasma membrane|cell cortex|junctional sarcoplasmic reticulum membrane|terminal cisterna|sarcoplasmic reticulum|junctional membrane complex|T-tubule|I band|sarcoplasmic reticulum membrane|sarcoplasmic reticulum membrane|extracellular vesicular exosome|	response to hypoxia|outflow tract morphogenesis|calcium ion transport|muscle contraction|release of sequestered calcium ion into cytosol by sarcoplasmic reticulum|response to caffeine|ion transmembrane transport|skin development|ossification involved in bone maturation|skeletal muscle fiber development|release of sequestered calcium ion into cytosol|cytosolic calcium ion homeostasis|transmembrane…	protease binding|ryanodine-sensitive calcium-release channel activity|ryanodine-sensitive calcium-release channel activity|voltage-gated calcium channel activity|calcium channel activity|calcium ion binding|protein binding|calmodulin binding|calcium-release channel activity|	9	7.52	3.34	10	8.97	7.42	8.03	10.3	0.00418	2.75	16.9	0
ENSG00000112473	SLC39A7	solute carrier family 39 (zinc transporter), member 7	endoplasmic reticulum membrane|Golgi apparatus|membrane|integral component of membrane|	zinc ion transport|transmembrane transport|	protein binding|metal ion transmembrane transporter activity|	9	6.78	4.8	10	5.7	5.93	6.13	10.2	0.00425	2.6	12.3	0
ENSG00000184033	CTAG1B	cancer/testis antigen 1B	None	None	None	9	3.71	6.4	9	3.64	4.22	3.7	10.2	0.00425	1.16	6.87	0
ENSG00000163946	FAM208A	family with sequence similarity 208, member A	None	None	poly(A) RNA binding|	10	3.44	6.05	10	3.04	4.54	3.13	10.2	0.00425	1.09	5.89	0
ENSG00000178919	FOXE1	forkhead box E1 (thyroid transcription factor 2)	nucleus|	negative regulation of transcription from RNA polymerase II promoter|negative regulation of transcription from RNA polymerase II promoter|transcription from RNA polymerase II promoter|thyroid hormone generation|anatomical structure morphogenesis|cell migration|thyroid gland development|thyroid gland development|hair follicle morphogenesis|negative regulation of transcription, DNA-templated|positi…	sequence-specific DNA binding RNA polymerase II transcription factor activity|DNA binding|double-stranded DNA binding|sequence-specific DNA binding transcription factor activity|sequence-specific DNA binding|	10	3.45	5.33	10	3.11	5.24	3.28	10.2	0.00425	0.94	6.49	0
ENSG00000168828	OR13J1	olfactory receptor, family 13, subfamily J, member 1	plasma membrane|integral component of membrane|	G-protein coupled receptor signaling pathway|detection of chemical stimulus involved in sensory perception of smell|	G-protein coupled receptor activity|olfactory receptor activity|	10	3.34	4.67	9	3.89	6.06	3.63	10.2	0.00425	1.25	6.92	0
ENSG00000174574	AKIRIN1	akirin 1	nucleus|nuclear membrane|	None	None	9	3.97	5.2	9	4.68	5.42	4.6	10.1	0.00432	1.41	8.86	0
ENSG00000172738	TMEM217	transmembrane protein 217	integral component of membrane|	None	None	10	3.71	4.48	10	5.56	6.59	5.25	10.1	0.00432	1.58	9.41	0
ENSG00000105479	CCDC114	coiled-coil domain containing 114	cilium|outer dynein arm|	outer dynein arm assembly|	None	10	6.73	7.26	10	8.19	3.25	7.12	10.1	0.00432	3.32	14.6	0
ENSG00000157303	SUSD3	sushi domain containing 3	integral component of membrane|	None	None	10	4.07	6.41	10	2.44	4.64	2.96	10.1	0.00432	0.89	7.01	0
ENSG00000170322	NFRKB	nuclear factor related to kappaB binding protein	nucleus|Ino80 complex|Ino80 complex|	DNA repair|DNA recombination|regulation of transcription, DNA-templated|transcription from RNA polymerase II promoter|inflammatory response|	protease binding|DNA binding|protein binding|	9	3.73	9.15	10	1.78	2.45	2.68	10.1	0.00432	0.88	6.27	0
ENSG00000089597	GANAB	glucosidase, alpha; neutral AB	endoplasmic reticulum lumen|Golgi apparatus|membrane|glucosidase II complex|melanosome|extracellular vesicular exosome|	protein folding|protein N-linked glycosylation via asparagine|post-translational protein modification|cellular protein metabolic process|	carbohydrate binding|glucan 1,3-alpha-glucosidase activity|poly(A) RNA binding|	10	-1.3	6.39	10	-1.31	4.06	-1.31	10.1	0.00432	-3.12	-0.39	0
ENSG00000131507	NDFIP1	Nedd4 family interacting protein 1	Golgi membrane|extracellular region|cell cortex|endosome membrane|integral component of membrane|perinuclear region of cytoplasm|	regulation of myeloid leukocyte differentiation|negative regulation of type 2 immune response|cellular iron ion homeostasis|signal transduction|negative regulation of gene expression|positive regulation of protein ubiquitination|negative regulation of transporter activity|negative regulation of interleukin-4 production|negative regulation of T cell proliferation|positive regulation of I-kappaB ki…	signal transducer activity|protein binding|WW domain binding|	10	9.24	3.59	10	7.71	6.92	8.5	10.1	0.00432	3.88	16.7	0
ENSG00000173264	GPR137	G protein-coupled receptor 137	integral component of membrane|	None	None	9	5.8	5.93	10	5.32	4.54	5.61	10	0.0044	1.93	10.7	0
ENSG00000100336	APOL4	apolipoprotein L, 4	cellular_component|extracellular space|	lipid metabolic process|lipid transport|lipoprotein metabolic process|	molecular_function|lipid binding|	10	3.36	7.85	9	2.91	2.51	3.34	9.99	0.00441	1.12	6.82	0
ENSG00000107779	BMPR1A	bone morphogenetic protein receptor, type IA	plasma membrane|plasma membrane|caveola|integral component of membrane|dendrite|neuronal cell body|	in utero embryonic development|mesoderm formation|somitogenesis|Mullerian duct regression|positive regulation of mesenchymal cell proliferation|endocardial cushion formation|transcription from RNA polymerase II promoter|protein phosphorylation|immune response|transforming growth factor beta receptor signaling pathway|ectoderm development|dorsal/ventral axis specification|positive regulation of pa…	sequence-specific DNA binding RNA polymerase II transcription factor activity|protein serine/threonine kinase activity|transmembrane receptor protein serine/threonine kinase activity|receptor signaling protein serine/threonine kinase activity|transforming growth factor beta-activated receptor activity|protein binding|ATP binding|protein homodimerization activity|SMAD binding|metal ion binding|	10	3.8	7.75	10	2.38	3.13	3.52	9.96	0.00443	1.22	7.33	0
ENSG00000135956	TMEM127	transmembrane protein 127	cytoplasm|plasma membrane|integral component of membrane|	negative regulation of cell proliferation|negative regulation of TOR signaling|	molecular_function|	10	4.29	5.13	10	5.19	5.29	4.98	9.95	0.00445	1.39	8.98	0
ENSG00000196275	GTF2IRD2	GTF2I repeat domain containing 2	nucleus|	transcription, DNA-templated|regulation of transcription, DNA-templated|	DNA binding|	9	-0.16	0.0342	9	-2.98	12.1	-2.85	9.94	0.00446	-7.39	-0.89	0
ENSG00000185950	IRS2	insulin receptor substrate 2	cytosol|plasma membrane|	positive regulation of mesenchymal cell proliferation|negative regulation of B cell apoptotic process|glucose metabolic process|signal transduction|epidermal growth factor receptor signaling pathway|brain development|cell proliferation|positive regulation of cell proliferation|insulin receptor signaling pathway|insulin receptor signaling pathway|fibroblast growth factor receptor signaling pathway…	signal transducer activity|insulin receptor binding|protein binding|protein kinase binding|protein phosphatase binding|protein domain specific binding|phosphatidylinositol 3-kinase binding|14-3-3 protein binding|	10	3.15	4.01	10	3.98	6.63	3.78	9.93	0.00446	1.23	6.99	0
ENSG00000137727	ARHGAP20	Rho GTPase activating protein 20	cytosol|	small GTPase mediated signal transduction|positive regulation of GTPase activity|regulation of small GTPase mediated signal transduction|	GTPase activator activity|	10	-1.61	5.52	10	-2.16	4.95	-1.83	9.91	0.00448	-4.53	-0.51	0
ENSG00000129951	LPPR3	lipid phosphate phosphatase-related protein type 3	integral component of membrane|	dephosphorylation|	phosphatidate phosphatase activity|	10	3.58	4.16	10	5.5	6.97	4.25	9.9	0.00449	1.27	9.12	0
ENSG00000189403	HMGB1	high mobility group box 1	condensed chromosome|extracellular region|extracellular space|nucleus|nucleoplasm|cell surface|transcriptional repressor complex|	negative regulation of transcription from RNA polymerase II promoter|myeloid dendritic cell activation|dendritic cell chemotaxis|inflammatory response to antigenic stimulus|DNA topological change|base-excision repair, DNA ligation|apoptotic DNA fragmentation|DNA recombination|regulation of transcription from RNA polymerase II promoter|apoptotic process|cellular component disassembly involved in e…	damaged DNA binding|double-stranded DNA binding|single-stranded DNA binding|sequence-specific DNA binding transcription factor activity|cytokine activity|protein binding|transcription factor binding|DNA binding, bending|DNA binding, bending|chemoattractant activity|poly(A) RNA binding|RAGE receptor binding|repressing transcription factor binding|	7	3.13	5.98	7	3.24	4.29	3.13	9.9	0.00449	1.12	6.64	0
ENSG00000156508	EEF1A1	eukaryotic translation elongation factor 1 alpha 1	extracellular space|nucleus|nucleolus|cytoplasm|cytoplasm|cytoplasm|cytosol|eukaryotic translation elongation factor 1 complex|plasma membrane|membrane|extracellular vesicular exosome|	GTP catabolic process|transcription, DNA-templated|regulation of transcription, DNA-templated|translation|translational elongation|gene expression|cellular protein metabolic process|cellular response to epidermal growth factor stimulus|	translation elongation factor activity|GTPase activity|protein binding|GTP binding|protein kinase binding|poly(A) RNA binding|	5	4.75	7.04	5	4.44	3.21	4.75	9.88	0.0045	1.95	10.3	0
ENSG00000164944	KIAA1429	KIAA1429	nucleus|	mRNA processing|RNA splicing|	poly(A) RNA binding|	8	-1.13	0.848	9	-2.9	10.3	-2.6	9.85	0.00453	-6.71	-0.85	0
ENSG00000166012	TAF1D	TATA box binding protein (TBP)-associated factor, RNA polymerase I, D, 41kDa	nucleus|nucleoplasm|microtubule organizing center|	regulation of transcription, DNA-templated|transcription from RNA polymerase I promoter|transcription initiation from RNA polymerase I promoter|transcription elongation from RNA polymerase I promoter|termination of RNA polymerase I transcription|gene expression|	DNA binding|protein binding|	8	6.95	5.02	9	3.41	6.2	4.01	9.84	0.00454	1.09	9.9	0
ENSG00000166676	TVP23A	trans-golgi network vesicle protein 23 homolog A (S. cerevisiae)	integral component of membrane|	None	None	10	5.4	10.2	10	1.83	1.29	5.04	9.83	0.00455	1.83	9.77	0
ENSG00000001036	FUCA2	fucosidase, alpha-L- 2, plasma	extracellular space|lysosome|extracellular vesicular exosome|	fucose metabolic process|response to bacterium|glycoside catabolic process|regulation of entry of bacterium into host cell|	alpha-L-fucosidase activity|alpha-L-fucosidase activity|fucose binding|	10	8.85	6.42	10	8.46	3.79	8.66	9.82	0.00455	3.29	17	0
ENSG00000165502	RPL36AL	ribosomal protein L36a-like	ribosome|	translation|	structural constituent of ribosome|	9	3.56	5.54	9	3.1	4.69	3.16	9.81	0.00456	1.18	6.94	0
ENSG00000214919	AC104472.1	N/A	None	None	None	4	4.64	6.54	4	4.24	3.7	4.52	9.81	0.00456	1.99	9.85	0
ENSG00000179477	ALOX12B	arachidonate 12-lipoxygenase, 12R type	cytosol|	protein lipidation|sphingolipid metabolic process|positive regulation of gene expression|arachidonic acid metabolic process|arachidonic acid metabolic process|arachidonic acid metabolic process|lipoxygenase pathway|lipoxygenase pathway|lipoxygenase pathway|positive regulation of MAPK cascade|linoleic acid metabolic process|small molecule metabolic process|ceramide biosynthetic process|hepoxilin b…	arachidonate 12-lipoxygenase activity|arachidonate 12-lipoxygenase activity|iron ion binding|protein binding|oxidoreductase activity, acting on single donors with incorporation of molecular oxygen, incorporation of two atoms of oxygen|linoleate 9S-lipoxygenase activity|	10	4.17	4.61	10	3.66	5.62	3.92	9.8	0.00457	1.45	7.94	0
ENSG00000146457	WTAP	Wilms tumor 1 associated protein	nucleus|nuclear speck|nuclear membrane|MIS complex|	regulation of alternative mRNA splicing, via spliceosome|mRNA processing|cell cycle|RNA splicing|mRNA methylation|	None	10	0.48	0.128	9	-2.82	11.6	-2.6	9.79	0.00458	-6.97	-0.87	0
ENSG00000223609	HBD	hypophosphatemic bone disease	None	None	None	10	4.92	5.33	10	5.36	4.89	5.22	9.77	0.00461	2.2	10.3	0
ENSG00000101335	MYL9	myosin, light chain 9, regulatory	stress fiber|cytosol|muscle myosin complex|Z disc|	muscle contraction|regulation of muscle contraction|axon guidance|	calcium ion binding|structural constituent of muscle|	10	3.03	7.64	10	1.9	2.54	2.41	9.73	0.00465	0.82	5.55	0
ENSG00000012124	CD22	CD22 molecule	integral component of plasma membrane|external side of plasma membrane|extracellular vesicular exosome|	cell adhesion|	protein binding|	9	4.03	4.34	9	4.78	5.82	4.1	9.72	0.00465	1.42	9.5	0
ENSG00000189308	LIN54	lin-54 DREAM MuvB core complex component	nucleoplasm|	G2/M transition of mitotic cell cycle|mitotic cell cycle|transcription, DNA-templated|regulation of transcription, DNA-templated|regulation of cell cycle|	DNA binding|protein binding|	10	2.92	5.62	10	3.15	4.5	2.96	9.71	0.00466	0.9	5.47	0
ENSG00000142230	SAE1	SUMO1 activating enzyme subunit 1	nucleus|nucleus|nucleoplasm|cytosol|intracellular membrane-bounded organelle|	regulation of mitotic cell cycle|protein ubiquitination|protein sumoylation|protein sumoylation|protein sumoylation|SMT3-dependent protein catabolic process|positive regulation of catalytic activity|post-translational protein modification|cellular protein metabolic process|	ubiquitin activating enzyme activity|protein binding|protein C-terminus binding|enzyme activator activity|SUMO activating enzyme activity|ATP-dependent protein binding|protein heterodimerization activity|protein heterodimerization activity|	7	8.46	5.41	7	5.61	5.51	7.26	9.7	0.00467	1.68	15.2	0
ENSG00000101752	MIB1	mindbomb E3 ubiquitin protein ligase 1	centrosome|cytosol|plasma membrane|postsynaptic density|cytoplasmic vesicle|	blood vessel development|in utero embryonic development|somitogenesis|neural tube formation|heart looping|Notch signaling pathway|protein ubiquitination|negative regulation of neuron differentiation|positive regulation of endocytosis|	ubiquitin-protein transferase activity|protein binding|zinc ion binding|ligase activity|	10	-2.45	8.32	10	-1.35	2.23	-2.08	9.69	0.00468	-5.58	-0.58	0
ENSG00000101337	TM9SF4	transmembrane 9 superfamily protein member 4	integral component of membrane|	None	None	10	2.61	4.8	9	3.34	5.36	3.26	9.67	0.0047	0.93	6.19	0
ENSG00000162222	TTC9C	tetratricopeptide repeat domain 9C	None	None	None	10	6.44	5.82	10	5.94	4.25	6.16	9.66	0.0047	2.51	12.3	0
ENSG00000198242	RPL23A	ribosomal protein L23a	nucleus|cytosol|cytosolic large ribosomal subunit|cytosolic large ribosomal subunit|TORC2 complex|extracellular vesicular exosome|	nuclear-transcribed mRNA catabolic process, nonsense-mediated decay|translation|translation|translational initiation|translational elongation|translational termination|SRP-dependent cotranslational protein targeting to membrane|cell proliferation|gene expression|viral process|RNA metabolic process|mRNA metabolic process|viral life cycle|viral transcription|cellular protein metabolic process|	nucleotide binding|structural constituent of ribosome|protein binding|rRNA binding|poly(A) RNA binding|	9	-1.56	3.07	9	-4.76	9.54	-4.34	9.65	0.00472	-9.94	-0.91	0
ENSG00000096063	SRPK1	SRSF protein kinase 1	nucleus|cytoplasm|endoplasmic reticulum|plasma membrane|nuclear matrix|	mRNA processing|protein phosphorylation|chromosome segregation|RNA splicing|viral process|sperm chromatin condensation|intracellular signal transduction|positive regulation of viral genome replication|negative regulation of viral genome replication|innate immune response|regulation of mRNA splicing, via spliceosome|regulation of mRNA processing|	magnesium ion binding|protein kinase activity|protein serine/threonine kinase activity|protein binding|ATP binding|poly(A) RNA binding|	10	2.81	6.26	10	2.37	3.88	2.66	9.65	0.00472	0.88	5.06	0
ENSG00000167617	CDC42EP5	CDC42 effector protein (Rho GTPase binding) 5	cytoplasm|cytoskeleton|plasma membrane|endomembrane system|membrane|	JNK cascade|Rho protein signal transduction|regulation of cell shape|positive regulation of actin filament polymerization|positive regulation of pseudopodium assembly|	GTP-Rho binding|	10	4.08	9.52	10	1.87	1.92	3.21	9.63	0.00474	1	7.09	0
ENSG00000143110	C1ORF162	chromosome 1 open reading frame 162	integral component of membrane|	None	None	10	7.15	6.26	10	3.25	4.17	5.66	9.61	0.00476	1.53	12.1	0
ENSG00000197502	AL627171.1	N/A	None	None	None	1	5.8	3.76	1	7	6.37	6.76	9.6	0.00477	4.09	14	0
ENSG00000162604	TM2D1	TM2 domain containing 1	integral component of membrane|	apoptotic process|	None	10	4.5	6.85	10	2.77	3.33	4.03	9.58	0.0048	1.33	7.63	0
ENSG00000189320	FAM180A	family with sequence similarity 180, member A	extracellular region|	None	None	9	10.4	5.8	10	6.69	5.2	9.01	9.56	0.00482	3.65	18.3	0
ENSG00000132207	SLX1A	SLX1 structure-specific endonuclease subunit homolog A (S. cerevisiae)	Slx1-Slx4 complex|	double-strand break repair via homologous recombination|DNA catabolic process, endonucleolytic|DNA catabolic process, endonucleolytic|DNA repair|DNA double-strand break processing involved in repair via single-strand annealing|	protein binding|crossover junction endodeoxyribonuclease activity|5'-flap endonuclease activity|metal ion binding|	9	4.18	7.7	9	2.25	3.1	3.51	9.56	0.00482	1	6.83	0
ENSG00000198843	SELT	selenoprotein T	None	selenocysteine incorporation|cell redox homeostasis|	selenium binding|	10	-1.26	2.64	10	-1.65	7.36	-1.45	9.54	0.00484	-3.53	-0.38	0
ENSG00000184302	SIX6	SIX homeobox 6	nucleus|	regulation of transcription, DNA-templated|visual perception|organ morphogenesis|	sequence-specific DNA binding transcription factor activity|sequence-specific DNA binding|	8	3.67	6.67	10	4.47	3.25	4.33	9.52	0.00486	1.4	8.12	0
ENSG00000142207	URB1	URB1 ribosome biogenesis 1 homolog (S. cerevisiae)	nucleolus|nucleolus|	biological_process|	poly(A) RNA binding|	8	7.46	4.23	9	6.49	5.81	7.16	9.52	0.00486	1.84	13.3	0
ENSG00000166508	MCM7	minichromosome maintenance complex component 7	chromatin|nucleus|nucleoplasm|cytoplasm|cytosol|membrane|MCM complex|MCM complex|	G1/S transition of mitotic cell cycle|mitotic cell cycle|DNA replication|DNA unwinding involved in DNA replication|DNA replication initiation|DNA strand elongation involved in DNA replication|cellular response to DNA damage stimulus|cell proliferation|regulation of phosphorylation|response to drug|cellular response to epidermal growth factor stimulus|	DNA binding|single-stranded DNA binding|ATP-dependent DNA helicase activity|protein binding|ATP binding|	7	7.74	3.4	6	6.53	6.53	7.55	9.5	0.00488	3.06	14.9	0
ENSG00000130175	PRKCSH	protein kinase C substrate 80K-H	intracellular|endoplasmic reticulum|endoplasmic reticulum lumen|	in utero embryonic development|liver development|protein folding|N-glycan processing|nitrogen compound metabolic process|negative regulation of neuron projection development|protein N-linked glycosylation via asparagine|intracellular signal transduction|post-translational protein modification|cellular protein metabolic process|innate immune response|protein heterooligomerization|renal system deve…	RNA binding|protein kinase C binding|calcium ion binding|ion channel binding|phosphoprotein binding|	10	-1.63	6.54	10	-1.25	3.42	-1.43	9.49	0.00489	-3.39	-0.35	0
ENSG00000196712	NF1	neurofibromin 1	nucleus|nucleolus|cytoplasm|cytoplasm|membrane|axon|dendrite|intrinsic component of the cytoplasmic side of the plasma membrane|	MAPK cascade|osteoblast differentiation|metanephros development|response to hypoxia|liver development|negative regulation of endothelial cell proliferation|positive regulation of endothelial cell proliferation|regulation of cell-matrix adhesion|negative regulation of cell-matrix adhesion|negative regulation of protein kinase activity|cell communication|Ras protein signal transduction|negative reg…	Ras GTPase activator activity|protein binding|phosphatidylethanolamine binding|phosphatidylcholine binding|	10	2.21	4.63	10	3.95	6.19	2.75	9.49	0.00489	0.84	6.09	0
ENSG00000165553	NGB	neuroglobin	mitochondrion|perikaryon|	apoptotic process|oxygen transport|	oxygen transporter activity|iron ion binding|oxygen binding|heme binding|	10	3.35	4.03	10	3.4	5.82	3.37	9.49	0.00489	1.1	6.71	0
ENSG00000012983	MAP4K5	mitogen-activated protein kinase kinase kinase kinase 5	cytoplasm|plasma membrane|	protein phosphorylation|activation of JUN kinase activity|intracellular signal transduction|	protein kinase activity|protein serine/threonine kinase activity|small GTPase regulator activity|protein binding|ATP binding|	10	2.85	3.93	10	2.71	5.92	2.77	9.49	0.00489	0.84	5.47	0
ENSG00000103257	SLC7A5	solute carrier family 7 (amino acid transporter light chain, L system), member 5	nucleus|nucleolus|cytosol|plasma membrane|plasma membrane|membrane|integral component of membrane|apical plasma membrane|extracellular vesicular exosome|	cellular amino acid metabolic process|transport|ion transport|amino acid transport|nervous system development|blood coagulation|neutral amino acid transport|cell differentiation|leukocyte migration|transmembrane transport|L-alpha-amino acid transmembrane transport|	amino acid transmembrane transporter activity|neutral amino acid transmembrane transporter activity|L-amino acid transmembrane transporter activity|peptide antigen binding|	8	6.77	8.91	8	4.97	0.861	5.54	9.47	0.00492	1.47	12.3	0
ENSG00000163636	PSMD6	proteasome (prosome, macropain) 26S subunit, non-ATPase, 6	proteasome complex|nucleoplasm|cytosol|proteasome accessory complex|extracellular vesicular exosome|	G1/S transition of mitotic cell cycle|protein polyubiquitination|mitotic cell cycle|antigen processing and presentation of peptide antigen via MHC class I|antigen processing and presentation of exogenous peptide antigen via MHC class I, TAP-dependent|ATP catabolic process|proteolysis|regulation of cellular amino acid metabolic process|apoptotic process|DNA damage response, signal transduction by …	ATPase activity|	8	3.79	3.07	8	3.48	6.78	3.49	9.46	0.00493	1.12	7.99	0
ENSG00000129636	ITFG1	integrin alpha FG-GAP repeat containing 1	extracellular region|integral component of membrane|	None	None	9	2.68	5.44	9	5.57	5.55	4.3	9.45	0.00494	1.06	7.98	0
ENSG00000162572	SCNN1D	sodium channel, non-voltage-gated 1, delta subunit	plasma membrane|plasma membrane|actin cytoskeleton|membrane|integral component of membrane|	sodium ion transport|ion transmembrane transport|sodium ion transmembrane transport|sodium ion transmembrane transport|response to stimulus|sensory perception of taste|transmembrane transport|	protein binding|ligand-gated sodium channel activity|	10	-0.58	0.286	10	-2.87	11.2	-2.69	9.44	0.00495	-6.79	-0.81	0
ENSG00000145569	FAM105A	family with sequence similarity 105, member A	None	None	None	9	3.53	4.92	9	6.11	5.79	4.82	9.41	0.00499	1.5	9.63	0
ENSG00000181045	SLC26A11	solute carrier family 26 (anion exchanger), member 11	lysosomal membrane|endoplasmic reticulum|Golgi apparatus|plasma membrane|integral component of membrane|extracellular vesicular exosome|	sulfate transport|sulfate transmembrane transport|	secondary active sulfate transmembrane transporter activity|anion transmembrane transporter activity|anion:anion antiporter activity|	10	9.08	7.39	10	8.28	2.45	8.67	9.4	0.005	3.86	17.8	0
ENSG00000203797	DDO	D-aspartate oxidase	peroxisome|	aspartate metabolic process|aspartate catabolic process|insemination|grooming behavior|D-amino acid catabolic process|hormone metabolic process|oxidation-reduction process|oxidation-reduction process|	receptor binding|protein binding|D-aspartate oxidase activity|cofactor binding|	10	2.99	2.59	10	3.24	7.19	3.13	9.39	0.00501	0.99	6.26	0
ENSG00000172428	MYEOV2	myeloma overexpressed 2	None	None	None	10	3.18	3.72	10	5.18	6.37	4.52	9.37	0.00504	1.12	8.81	0
ENSG00000085982	USP40	ubiquitin specific peptidase 40	None	ubiquitin-dependent protein catabolic process|	cysteine-type peptidase activity|ubiquitinyl hydrolase activity|	9	2.92	3.3	9	3.91	6.55	3.78	9.36	0.00505	1.23	7.3	0
ENSG00000007968	E2F2	E2F transcription factor 2	nucleoplasm|transcription factor complex|	mitotic cell cycle|regulation of transcription, DNA-templated|transcription initiation from RNA polymerase II promoter|regulation of cell cycle|intrinsic apoptotic signaling pathway by p53 class mediator|lens fiber cell apoptotic process|	core promoter binding|DNA binding|sequence-specific DNA binding transcription factor activity|protein binding|transcription factor binding|	10	-1.38	2.56	9	-1.86	7.3	-1.69	9.36	0.00505	-4.53	-0.39	0
ENSG00000100320	RBFOX2	RNA binding protein, fox-1 homolog (C. elegans) 2	nucleus|cytoplasm|	regulation of alternative mRNA splicing, via spliceosome|mRNA processing|RNA splicing|regulation of definitive erythrocyte differentiation|RNA metabolic process|radial glia guided migration of Purkinje cell|intracellular estrogen receptor signaling pathway|regulation of cell proliferation|negative regulation of transcription, DNA-templated|dendrite morphogenesis|neuromuscular process controlling …	nucleotide binding|transcription corepressor activity|RNA binding|mRNA binding|protein binding|transcription factor binding|poly(A) RNA binding|	10	2.12	3.14	10	2.54	6.61	2.25	9.32	0.0051	0.76	4.84	0
ENSG00000101901	ALG13	ALG13, UDP-N-acetylglucosaminyltransferase subunit	endoplasmic reticulum membrane|	dolichol-linked oligosaccharide biosynthetic process|proteolysis|protein N-linked glycosylation via asparagine|lipid glycosylation|post-translational protein modification|cellular protein metabolic process|	N-acetylglucosaminyldiphosphodolichol N-acetylglucosaminyltransferase activity|cysteine-type peptidase activity|carbohydrate binding|poly(A) RNA binding|	9	4.22	4.13	9	4.83	5.67	4.22	9.32	0.0051	1.35	8.93	0
ENSG00000136940	PDCL	phosducin-like	cytoplasm|	protein folding|signal transduction|visual perception|regulation of G-protein coupled receptor protein signaling pathway|intracellular signal transduction|negative regulation of protein refolding|	receptor signaling protein activity|protein complex binding|	10	-1.53	2.66	10	-1.8	7.03	-1.68	9.32	0.0051	-4.48	-0.44	0
ENSG00000143612	C1ORF43	chromosome 1 open reading frame 43	integral component of membrane|	oxidation-reduction process|	oxidoreductase activity, acting on the CH-OH group of donors, NAD or NADP as acceptor|coenzyme binding|	10	4.95	9.43	10	1.54	1.82	4.4	9.31	0.00511	1.15	8.32	0
ENSG00000214046	SMIM7	small integral membrane protein 7	integral component of membrane|	None	None	10	3.87	7.07	10	2.27	3.2	3.04	9.3	0.00512	0.9	6.7	0
ENSG00000109270	LAMTOR3	late endosomal/lysosomal adaptor, MAPK and MTOR activator 3	extracellular vesicular exosome|Ragulator complex|	positive regulation of TOR signaling|cellular protein localization|positive regulation of GTPase activity|cellular response to amino acid stimulus|	guanyl-nucleotide exchange factor activity|protein binding|protein complex scaffold|	10	5.18	5.34	10	4.33	4.42	4.99	9.29	0.00513	1.21	9.01	0
ENSG00000254505	CHMP4A	charged multivesicular body protein 4A	ESCRT III complex|nucleus|cytoplasm|cytosol|cytoplasmic side of plasma membrane|midbody|cytoplasmic vesicle membrane|late endosome membrane|extracellular vesicular exosome|	posttranslational protein targeting to membrane|membrane budding|membrane budding|viral process|endosomal transport|viral life cycle|protein homooligomerization|membrane organization|membrane tubulation|membrane tubulation|negative regulation of neuron death|negative regulation of autophagic vacuole assembly|	protein binding|lipid binding|identical protein binding|protein homodimerization activity|ATPase binding|	10	4.71	6.86	10	3.43	3.2	4.44	9.28	0.00515	1.25	9.35	0
ENSG00000071189	SNX13	sorting nexin 13	early endosome|early endosome membrane|	intracellular protein transport|termination of G-protein coupled receptor signaling pathway|positive regulation of GTPase activity|	phosphatidylinositol binding|	10	4	6.49	10	3.02	3.5	3.77	9.27	0.00516	1.11	7.14	0
ENSG00000140262	TCF12	transcription factor 12	nuclear chromatin|nucleus|transcription factor complex|cytoplasm|	transcription, DNA-templated|regulation of transcription from RNA polymerase II promoter|immune response|muscle organ development|positive regulation of neuron differentiation|positive regulation of transcription, DNA-templated|	sequence-specific DNA binding transcription factor activity|protein binding|transcription factor binding|enhancer binding|bHLH transcription factor binding|transcription regulatory region DNA binding|SMAD binding|protein heterodimerization activity|E-box binding|	10	-2.28	5.52	10	-1.53	4.36	-1.88	9.26	0.00518	-5.03	-0.45	0
ENSG00000143337	TOR1AIP1	torsin A interacting protein 1	nucleus|nuclear inner membrane|integral component of membrane|	positive regulation of ATPase activity|	ATPase activator activity|cytoskeletal protein binding|ATPase binding|	9	4.82	5.14	10	3.68	4.82	4.2	9.25	0.00519	1.41	8.16	0
ENSG00000100997	ABHD12	abhydrolase domain containing 12	alpha-amino-3-hydroxy-5-methyl-4-isoxazolepropionic acid selective glutamate receptor complex|	phosphatidylserine catabolic process|adult walking behavior|response to auditory stimulus|	acylglycerol lipase activity|	10	3.49	4.64	10	4.38	5.07	4.28	9.24	0.0052	1.25	8.05	0
ENSG00000185982	DEFB128	defensin, beta 128	extracellular region|	defense response to bacterium|	None	8	3.69	6.67	8	2.66	3.34	3.38	9.22	0.00522	1.05	6.91	0
ENSG00000106823	ECM2	extracellular matrix protein 2, female organ and adipocyte specific	proteinaceous extracellular matrix|interstitial matrix|	cell-matrix adhesion|positive regulation of cell-substrate adhesion|extracellular matrix organization|	integrin binding|heparin binding|collagen V binding|	10	-3.12	10.1	10	-0.9	1.04	-2.3	9.21	0.00523	-7.49	-0.71	0
ENSG00000158195	WASF2	WAS protein family, member 2	ruffle|intracellular|early endosome|cytosol|actin cytoskeleton|lamellipodium|SCAR complex|extracellular vesicular exosome|	angiogenesis|ameboidal cell migration|adenylate cyclase-modulating G-protein coupled receptor signaling pathway|positive regulation of lamellipodium assembly|Rac protein signal transduction|lamellipodium assembly|actin cytoskeleton organization|actin filament-based movement|megakaryocyte development|Fc-gamma receptor signaling pathway involved in phagocytosis|innate immune response|negative regul…	actin binding|protein binding|protein complex binding|protein complex binding|	9	-3.38	9.45	9	-1.29	1.5	-2.87	9.21	0.00523	-8.48	-0.97	0
ENSG00000126261	UBA2	ubiquitin-like modifier activating enzyme 2	nucleoplasm|cytosol|SUMO activating enzyme complex|	protein sumoylation|protein sumoylation|protein sumoylation|SMT3-dependent protein catabolic process|positive regulation of catalytic activity|post-translational protein modification|cellular protein metabolic process|	protein binding|ATP binding|enzyme activator activity|transcription factor binding|ligase activity|SUMO activating enzyme activity|SUMO activating enzyme activity|metal ion binding|protein heterodimerization activity|	6	4.84	5.55	5	3.71	4.22	3.91	9.17	0.00529	1.33	9.39	0
ENSG00000146574	CCZ1B	CCZ1 vacuolar protein trafficking and biogenesis associated homolog B (S. cerevisiae)	lysosomal membrane|	None	None	10	2.46	4.91	10	6.03	5.14	3.7	9.16	0.00529	0.94	8.71	0
ENSG00000188060	RAB42	RAB42, member RAS oncogene family	membrane|	small GTPase mediated signal transduction|	GTP binding|	10	3.86	8.43	10	2.68	1.31	3.8	9.15	0.0053	1.15	7.07	0
ENSG00000124313	IQSEC2	IQ motif and Sec7 domain 2	nucleus|cell junction|	actin cytoskeleton organization|regulation of ARF protein signal transduction|positive regulation of GTPase activity|positive regulation of GTPase activity|	ARF guanyl-nucleotide exchange factor activity|	10	2.96	5.04	10	2.43	4.57	2.59	9.14	0.00531	0.8	5.31	0
ENSG00000267534	S1PR2	sphingosine-1-phosphate receptor 2	plasma membrane|plasma membrane|integral component of membrane|	activation of MAPK activity|sphingosine-1-phosphate signaling pathway|G-protein coupled receptor signaling pathway|positive regulation of cell proliferation|negative regulation of excitatory postsynaptic membrane potential|positive regulation of establishment of endothelial barrier|	G-protein coupled receptor binding|G-protein coupled receptor activity|integrin binding|lipid binding|sphingosine-1-phosphate receptor activity|	10	-1.05	2.92	10	-1.55	6.87	-1.36	9.14	0.00531	-3.38	-0.31	0
ENSG00000165288	BRWD3	bromodomain and WD repeat domain containing 3	None	cytoskeleton organization|regulation of cell shape|	None	10	2.08	2.86	10	2.79	6.78	2.68	9.13	0.00533	0.81	6.67	0
ENSG00000130311	DDA1	DET1 and DDB1 associated 1	None	None	None	10	2.72	4	10	4.9	5.96	3.86	9.12	0.00535	1.06	8.3	0
ENSG00000162461	SLC25A34	solute carrier family 25, member 34	mitochondrial inner membrane|integral component of membrane|	transport|	None	10	-3.1	10.8	10	-0.57	0.368	-2.45	9.11	0.00536	-7.65	-0.78	0
ENSG00000158008	EXTL1	exostosin-like glycosyltransferase 1	integral component of membrane|intrinsic component of endoplasmic reticulum membrane|	skeletal system development|protein glycosylation|	glucuronosyl-N-acetylglucosaminyl-proteoglycan 4-alpha-N-acetylglucosaminyltransferase activity|	10	4.57	5.64	10	4.5	3.82	4.52	9.1	0.00537	1.58	9.05	0
ENSG00000203667	COX20	COX20 cytochrome C oxidase assembly factor	mitochondrion|integral component of membrane|mitochondrial membrane|	None	None	5	6.04	6.96	7	3.13	3.27	4.14	9.1	0.00537	1.14	10.5	0
ENSG00000140105	WARS	tryptophanyl-tRNA synthetase	nucleus|cytoplasm|cytoplasm|cytosol|extracellular vesicular exosome|	angiogenesis|translation|tRNA aminoacylation for protein translation|tryptophanyl-tRNA aminoacylation|negative regulation of cell proliferation|gene expression|regulation of angiogenesis|	tryptophan-tRNA ligase activity|tryptophan-tRNA ligase activity|protein binding|ATP binding|	6	0.59	0.106	7	-5.67	11.6	-5.47	9.09	0.00538	-12.9	-3.52	0
ENSG00000157800	SLC37A3	solute carrier family 37, member 3	integral component of membrane|	carbohydrate transport|transmembrane transport|	transporter activity|	10	3.88	5.41	10	5.58	4.19	3.88	9.07	0.0054	1.14	9.61	0
ENSG00000175854	SWI5	SWI5 recombination repair homolog (yeast)	nucleus|Swi5-Sfr1 complex|	double-strand break repair via homologous recombination|cellular response to ionizing radiation|	protein binding|	9	7.25	3.88	10	8.69	5.65	7.62	9.07	0.0054	2.85	16	0
ENSG00000198444	F8A2	coagulation factor VIII-associated 2	None	None	None	7	6.47	2.74	8	6.03	6.69	6.2	9.06	0.00542	2.8	12.9	0
ENSG00000184613	NELL2	NEL-like 2 (chicken)	extracellular region|	None	calcium ion binding|protein binding|	10	1.04	0.449	10	-2.33	10.4	-2.08	9.06	0.00542	-6.57	-0.41	0
ENSG00000197932	F8A1	coagulation factor VIII-associated 1	None	None	None	7	6.47	2.74	8	6.03	6.69	6.2	9.06	0.00542	2.8	12.9	0
ENSG00000213906	LTB4R2	leukotriene B4 receptor 2	plasma membrane|integral component of plasma membrane|membrane|	chemotaxis|G-protein coupled receptor signaling pathway|negative regulation of adenylate cyclase activity|	leukotriene receptor activity|	10	4.93	1.91	10	7.12	8.06	6.1	9.06	0.00542	2.74	12.8	0
ENSG00000119899	SLC17A5	solute carrier family 17 (acidic sugar transporter), member 5	cytoplasm|lysosomal membrane|lysosomal membrane|plasma membrane|integral component of plasma membrane|membrane|cell junction|synaptic vesicle membrane|	ion transport|anion transport|amino acid transport|sialic acid transport|proton transport|transmembrane transport|	sugar:proton symporter activity|sialic acid transmembrane transporter activity|	10	2.58	2.28	10	3.15	7.12	3.15	9.05	0.00543	0.87	7.08	0
ENSG00000138115	CYP2C8	cytochrome P450, family 2, subfamily C, polypeptide 8	endoplasmic reticulum membrane|	organic acid metabolic process|xenobiotic metabolic process|drug metabolic process|arachidonic acid metabolic process|epoxygenase P450 pathway|exogenous drug catabolic process|small molecule metabolic process|oxidation-reduction process|oxidative demethylation|omega-hydroxylase P450 pathway|	monooxygenase activity|iron ion binding|heme binding|caffeine oxidase activity|aromatase activity|	10	4.02	6.62	10	3.46	2.85	3.68	9.05	0.00543	1.2	7.27	0
ENSG00000147457	CHMP7	charged multivesicular body protein 7	ESCRT III complex|cytosol|	protein transport|viral process|endosomal transport|viral life cycle|late endosome to vacuole transport|membrane organization|	protein transporter activity|	10	2.5	4.94	10	2.78	4.48	2.65	9.03	0.00545	0.8	6.92	0
ENSG00000164056	SPRY1	sprouty homolog 1, antagonist of FGF signaling (Drosophila)	cytosol|plasma membrane|	metanephros development|ureteric bud development|organ induction|epidermal growth factor receptor signaling pathway|negative regulation of cell proliferation|negative regulation of Ras GTPase activity|negative regulation of fibroblast growth factor receptor signaling pathway|negative regulation of epidermal growth factor receptor signaling pathway|negative regulation of MAP kinase activity|negati…	protein binding|	9	-3.98	9.18	9	-1.55	1.65	-3.54	9.03	0.00545	-9.73	-1.55	0
ENSG00000120533	ENY2	enhancer of yellow 2 homolog (Drosophila)	SAGA complex|nuclear pore|transcription export complex 2|DUBm complex|	chromatin organization|transcription elongation from RNA polymerase II promoter|mRNA export from nucleus|protein transport|histone deubiquitination|positive regulation of transcription, DNA-templated|	transcription coactivator activity|ligand-dependent nuclear receptor transcription coactivator activity|	5	4.14	4.8	7	3.71	4.62	3.81	9.03	0.00545	1.2	8.54	0
ENSG00000170027	YWHAG	tyrosine 3-monooxygenase/tryptophan 5-monooxygenase activation protein, gamma	cytosol|membrane|cytoplasmic vesicle membrane|extracellular vesicular exosome|	G2/M transition of mitotic cell cycle|mitotic cell cycle|negative regulation of protein kinase activity|protein targeting|apoptotic process|regulation of signal transduction|cellular response to insulin stimulus|regulation of neuron differentiation|regulation of synaptic plasticity|membrane organization|negative regulation of protein serine/threonine kinase activity|intrinsic apoptotic signaling …	protein kinase C binding|insulin-like growth factor receptor binding|protein binding|protein kinase C inhibitor activity|protein domain specific binding|receptor tyrosine kinase binding|poly(A) RNA binding|	10	2.45	2.39	10	3.21	7.12	2.76	9.01	0.00548	0.85	5.77	0
ENSG00000124232	RBPJL	recombination signal binding protein for immunoglobulin kappa J region-like	nucleus|transcription factor complex|	regulation of transcription from RNA polymerase II promoter|transcription from RNA polymerase II promoter|signal transduction|positive regulation of transcription, DNA-templated|	RNA polymerase II core promoter proximal region sequence-specific DNA binding|RNA polymerase II core promoter proximal region sequence-specific DNA binding transcription factor activity|sequence-specific DNA binding transcription factor activity|	10	3.94	5.99	10	6.13	3.7	3.96	9.01	0.00548	1.16	9.43	0
ENSG00000212124	TAS2R19	taste receptor, type 2, member 19	plasma membrane|integral component of membrane|	G-protein coupled receptor signaling pathway|	None	10	7.94	4.34	10	5.25	5.93	6.02	9	0.00549	1.75	13.5	0
ENSG00000255284	AP006621.5	N/A	None	None	None	10	3.4	4.57	10	2.83	4.87	2.99	8.99	0.00551	0.83	6.06	0
ENSG00000164659	KIAA1324L	KIAA1324-like	integral component of membrane|	None	None	10	-0.37	0.122	10	-5.15	11.6	-4.91	8.99	0.00551	-13	-1.99	0
ENSG00000161202	DVL3	dishevelled segment polarity protein 3	cell cortex|	positive regulation of protein phosphorylation|outflow tract septum morphogenesis|Wnt signaling pathway|intracellular signal transduction|non-canonical Wnt signaling pathway|non-canonical Wnt signaling pathway via JNK cascade|response to drug|positive regulation of JUN kinase activity|positive regulation of transcription, DNA-templated|convergent extension|canonical Wnt signaling pathway|canonica…	protease binding|signal transducer activity|receptor binding|frizzled binding|protein binding|beta-catenin binding|protein heterodimerization activity|	10	2.47	2.63	10	3.14	6.83	3.03	8.99	0.00551	0.83	5.99	0
ENSG00000157765	SLC34A2	solute carrier family 34 (type II sodium/phosphate contransporter), member 2	plasma membrane|integral component of plasma membrane|integral component of membrane|integral component of membrane|apical plasma membrane|brush border membrane|microvillus membrane|	in utero embryonic development|ion transport|phosphate ion transport|aging|response to fructose|cellular phosphate ion homeostasis|response to estradiol|phosphate ion transmembrane transport|sodium ion transmembrane transport|response to estrogen|sodium-dependent phosphate transport|transmembrane transport|	sodium:phosphate symporter activity|sodium-dependent phosphate transmembrane transporter activity|protein domain specific binding|sodium ion binding|phosphate ion binding|	10	6.62	5.72	10	-2.2	8.42	5.9	8.97	0.00554	-2.83	16	0
ENSG00000215902	AL353354.1	N/A	None	None	None	4	5.15	3.77	4	6.71	5.71	5.64	8.96	0.00555	2.3	12.8	0
ENSG00000206557	TRIM71	tripartite motif containing 71, E3 ubiquitin protein ligase	cytoplasmic mRNA processing body|	G1/S transition of mitotic cell cycle|neural tube closure|fibroblast growth factor receptor signaling pathway|miRNA metabolic process|neural tube development|negative regulation of translation involved in gene silencing by miRNA|protein autoubiquitination|regulation of gene silencing by miRNA|stem cell proliferation|regulation of neural precursor cell proliferation|positive regulation of gene sil…	ubiquitin-protein transferase activity|zinc ion binding|ligase activity|miRNA binding|	10	2.76	5.14	10	2.84	4.16	2.79	8.95	0.00557	0.74	5.78	0
ENSG00000173335	CST9	cystatin 9 (testatin)	extracellular region|	negative regulation of endopeptidase activity|	cysteine-type endopeptidase inhibitor activity|	10	6.48	3.69	10	3.15	6.14	3.51	8.93	0.00558	0.97	10	0
ENSG00000157778	PSMG3	proteasome (prosome, macropain) assembly chaperone 3	None	None	None	6	3.81	3.2	8	4.65	6.19	4.42	8.9	0.00562	1.12	9.12	0
ENSG00000074266	EED	embryonic ectoderm development	sex chromatin|nucleus|nucleus|nucleoplasm|cytoplasm|ESC/E(Z) complex|pronucleus|	regulation of gene expression by genetic imprinting|transcription, DNA-templated|histone methylation|negative regulation of transcription, DNA-templated|positive regulation of histone H3-K27 methylation|	chromatin binding|protein binding|histone methyltransferase activity|identical protein binding|	10	-0.71	0.904	10	-3.55	10.7	-3.28	8.9	0.00562	-8.41	-0.61	0
ENSG00000166881	TMEM194A	transmembrane protein 194A	integral component of membrane|	biological_process|	molecular_function|	10	2.98	5.34	10	3.39	4.03	3.09	8.88	0.00566	0.89	6.1	0
ENSG00000143179	UCK2	uridine-cytidine kinase 2	cellular_component|cytosol|intracellular membrane-bounded organelle|	pyrimidine nucleobase metabolic process|feeding behavior|phosphorylation|pyrimidine nucleoside salvage|UMP salvage|CTP salvage|small molecule metabolic process|response to axon injury|nucleobase-containing small molecule metabolic process|cellular response to oxygen levels|	uridine kinase activity|ATP binding|nucleoside kinase activity|	10	2.98	4.39	10	3.01	4.84	3	8.87	0.00568	0.82	6.61	0
ENSG00000205639	MFSD2B	major facilitator superfamily domain containing 2B	integral component of membrane|	transport|	None	9	8.88	6.04	10	5.97	4.01	7.63	8.85	0.00572	1.88	15.7	0
ENSG00000187997	C17ORF99	chromosome 17 open reading frame 99	extracellular region|	None	None	10	3.21	4.54	10	3.3	4.65	3.26	8.83	0.00575	0.98	6.28	0
ENSG00000239779	WBP1	WW domain binding protein 1	cellular_component|	biological_process|	protein binding|WW domain binding|WW domain binding|	10	7.46	6.31	10	4.26	4.16	5.77	8.83	0.00575	1.85	13.3	0
ENSG00000114120	SLC25A36	solute carrier family 25 (pyrimidine nucleotide carrier ), member 36	mitochondrial inner membrane|integral component of membrane|	response to estradiol|transmembrane transport|	None	10	3.44	5.43	10	3.06	3.85	3.29	8.82	0.00576	0.91	7.24	0
ENSG00000225697	SLC26A6	solute carrier family 26 (anion exchanger), member 6	endoplasmic reticulum|plasma membrane|plasma membrane|vesicle membrane|membrane|integral component of membrane|basolateral plasma membrane|apical plasma membrane|cytoplasmic vesicle membrane|brush border membrane|membrane-bounded vesicle|chloride channel complex|sperm midpiece|	ion transport|anion transport|chloride transport|chloride transport|sulfate transport|sulfate transport|bicarbonate transport|bicarbonate transport|formate transport|mannitol transport|oxalate transport|oxalate transport|transepithelial chloride transport|transepithelial chloride transport|angiotensin-activated signaling pathway|epithelial fluid transport|oxalic acid secretion|sperm capacitation|…	chloride channel activity|protein binding|secondary active sulfate transmembrane transporter activity|bicarbonate transmembrane transporter activity|bicarbonate transmembrane transporter activity|bicarbonate transmembrane transporter activity|chloride transmembrane transporter activity|chloride transmembrane transporter activity|chloride transmembrane transporter activity|sulfate transmembrane tr…	10	3.25	3.95	10	4.82	5.89	4.02	8.82	0.00576	1.05	8.47	0
ENSG00000120903	CHRNA2	cholinergic receptor, nicotinic, alpha 2 (neuronal)	plasma membrane|acetylcholine-gated channel complex|integral component of membrane|cell junction|postsynaptic membrane|	ion transport|cation transport|cation transport|signal transduction|synaptic transmission|ion transmembrane transport|protein heterooligomerization|	acetylcholine-activated cation-selective channel activity|drug binding|acetylcholine receptor activity|acetylcholine binding|	10	5.15	5.03	10	3.95	4.29	4.19	8.81	0.00577	1.35	9.1	0
ENSG00000171772	SYCE1	synaptonemal complex central element protein 1	central element|	synaptonemal complex assembly|	None	10	3.62	7.87	10	2.02	1.8	3.17	8.8	0.00579	0.78	6.56	0
ENSG00000269883	AC007375.1	N/A	None	None	None	10	2.72	6.41	10	2.03	2.94	2.53	8.78	0.00582	0.65	5.87	0
ENSG00000171865	RNASEH1	ribonuclease H1	nucleus|mitochondrion|	mitochondrial DNA replication|RNA catabolic process|RNA phosphodiester bond hydrolysis|RNA phosphodiester bond hydrolysis, endonucleolytic|	magnesium ion binding|nucleic acid binding|RNA binding|RNA-DNA hybrid ribonuclease activity|ribonuclease activity|protein homodimerization activity|	7	3.53	4.38	7	5.11	5.04	3.99	8.77	0.00584	1.14	8.65	0
ENSG00000163681	SLMAP	sarcolemma associated protein	smooth endoplasmic reticulum|microtubule organizing center|integral component of plasma membrane|sarcolemma|	muscle contraction|	protein binding|	10	2.95	6.65	9	2.54	2.55	2.81	8.75	0.00586	0.75	6.27	0
ENSG00000136167	LCP1	lymphocyte cytosolic protein 1 (L-plastin)	stress fiber|ruffle|phagocytic cup|extracellular space|cytoplasm|cytoplasm|cytosol|actin filament|plasma membrane|focal adhesion|actin cytoskeleton|filopodium|actin filament bundle|ruffle membrane|extracellular vesicular exosome|	T cell activation involved in immune response|protein kinase A signaling|cell migration|organ regeneration|regulation of intracellular protein transport|actin filament bundle assembly|	actin binding|calcium ion binding|identical protein binding|actin filament binding|	10	-1.13	1.69	10	-3.03	8.99	-2.55	8.75	0.00586	-6.97	-0.67	0
ENSG00000015592	STMN4	stathmin-like 4	Golgi apparatus|axon|growth cone|	regulation of microtubule polymerization or depolymerization|	None	10	2.9	3.39	10	2.99	5.71	2.99	8.74	0.00587	0.89	6.43	0
ENSG00000186567	CEACAM19	carcinoembryonic antigen-related cell adhesion molecule 19	integral component of membrane|	None	None	9	5.74	10.1	9	1.53	1.33	4.81	8.71	0.00592	1.1	11	0
ENSG00000092020	PPP2R3C	protein phosphatase 2, regulatory subunit B'', gamma	nucleus|cytoplasm|centrosome|	B cell homeostasis|regulation of antimicrobial humoral response|activation of protein kinase activity|T cell homeostasis|positive regulation of B cell differentiation|spleen development|regulation of mitochondrial depolarization|	calcium ion binding|	9	2.91	5.04	9	2.77	4	2.9	8.68	0.00597	0.84	5.72	0
ENSG00000122566	HNRNPA2B1	heterogeneous nuclear ribonucleoprotein A2/B1	nucleus|nucleoplasm|spliceosomal complex|cytoplasm|membrane|ribonucleoprotein complex|catalytic step 2 spliceosome|	mRNA splicing, via spliceosome|mRNA splicing, via spliceosome|mRNA processing|RNA splicing|gene expression|negative regulation of mRNA splicing, via spliceosome|RNA transport|	nucleotide binding|RNA binding|protein binding|single-stranded telomeric DNA binding|poly(A) RNA binding|pre-mRNA intronic binding|	9	3.69	5.79	9	2.34	3.61	3.2	8.68	0.00597	0.84	6.33	0
ENSG00000179934	CCR8	chemokine (C-C motif) receptor 8	plasma membrane|integral component of plasma membrane|	chemotaxis|immune response|cell adhesion|G-protein coupled receptor signaling pathway|positive regulation of cytosolic calcium ion concentration|chemokine-mediated signaling pathway|chemokine-mediated signaling pathway|	chemokine receptor activity|coreceptor activity|C-C chemokine receptor activity|	10	-1.84	9.6	10	-0.42	0.224	-1.64	8.67	0.00599	-4.64	-0.32	0
ENSG00000163825	RTP3	receptor (chemosensory) transporter protein 3	cytoplasm|integral component of membrane|	detection of chemical stimulus involved in sensory perception of bitter taste|protein targeting to membrane|	protein binding|	10	4.12	5.5	10	2.51	4.01	3.35	8.67	0.00599	0.98	6.65	0
ENSG00000122299	ZC3H7A	zinc finger CCCH-type containing 7A	nucleus|	None	poly(A) RNA binding|metal ion binding|	8	6.44	0.948	9	7.2	8.03	7.16	8.66	0.00601	2.21	14.2	0
ENSG00000102239	BRS3	bombesin-like receptor 3	plasma membrane|integral component of membrane|neuron projection|neuronal cell body|	glucose metabolic process|regulation of blood pressure|adult feeding behavior|bombesin receptor signaling pathway|	bombesin receptor activity|	10	9.14	7.15	10	4.18	4.64	5.73	8.66	0.00601	2.26	15.4	0
ENSG00000091622	PITPNM3	PITPNM family member 3	intracellular|endomembrane system|integral component of membrane|	phospholipid transport|phosphatidylinositol metabolic process|	calcium ion binding|protein binding|lipid binding|phosphatidylinositol transporter activity|receptor tyrosine kinase binding|	10	6.33	5.02	10	6.09	3.93	6.14	8.59	0.00612	1.26	11.6	0
ENSG00000085276	MECOM	MDS1 and EVI1 complex locus	histone deacetylase complex|nucleus|nuclear speck|	in utero embryonic development|neutrophil homeostasis|transcription, DNA-templated|regulation of transcription, DNA-templated|apoptotic process|inflammatory response|response to bacterium|post-embryonic development|cell differentiation|forebrain development|embryonic forelimb morphogenesis|embryonic hindlimb morphogenesis|regulation of cell proliferation|negative regulation of programmed cell dea…	DNA binding|sequence-specific DNA binding transcription factor activity|sequence-specific DNA binding transcription factor activity|protein binding|protein homodimerization activity|metal ion binding|	10	-1.59	6.67	10	-1.12	2.32	-1.39	8.57	0.00615	-3.57	-0.27	0
ENSG00000079387	SENP1	SUMO1/sentrin specific peptidase 1	nucleus|nucleoplasm|cytoplasm|focal adhesion|nuclear membrane|	proteolysis|activation of cysteine-type endopeptidase activity involved in apoptotic process|regulation of definitive erythrocyte differentiation|protein sumoylation|protein desumoylation|negative regulation of proteasomal ubiquitin-dependent protein catabolic process|post-translational protein modification|cellular protein metabolic process|positive regulation of transcription from RNA polymeras…	endopeptidase activity|protein binding|SUMO-specific protease activity|	10	3.25	4.18	10	3.02	4.73	3.08	8.54	0.0062	0.75	5.89	0
ENSG00000104549	SQLE	squalene epoxidase	endoplasmic reticulum membrane|integral component of membrane|	cholesterol biosynthetic process|cellular aromatic compound metabolic process|response to organic substance|sterol biosynthetic process|small molecule metabolic process|oxidation-reduction process|	squalene monooxygenase activity|squalene monooxygenase activity|flavin adenine dinucleotide binding|	10	2.96	6.59	10	1.68	2.82	2.54	8.53	0.00621	0.6	6.09	0
ENSG00000138071	ACTR2	ARP2 actin-related protein 2 homolog (yeast)	cytosol|Arp2/3 protein complex|Arp2/3 protein complex|actin cytoskeleton|membrane|actin cap|cell projection|extracellular vesicular exosome|	cellular component movement|establishment or maintenance of cell polarity|asymmetric cell division|cytoplasmic transport|actin cytoskeleton organization|meiotic cytokinesis|Fc-gamma receptor signaling pathway involved in phagocytosis|innate immune response|spindle localization|	actin binding|ATP binding|	9	2.92	4.98	9	2.6	3.94	2.69	8.53	0.00621	0.77	5.88	0
ENSG00000103254	FAM173A	family with sequence similarity 173, member A	integral component of membrane|	None	None	9	4.16	5.7	9	4.3	3.18	4.27	8.53	0.00621	1.03	8.49	0
ENSG00000135604	STX11	syntaxin 11	Golgi apparatus|membrane|	intracellular protein transport|neutrophil degranulation|cytotoxic T cell degranulation|natural killer cell degranulation|membrane fusion|	SNAP receptor activity|protein binding|	10	3.99	3.14	10	3.34	5.78	3.43	8.52	0.00623	0.97	6.78	0
ENSG00000111554	MDM1	Mdm1 nuclear protein homolog (mouse)	nucleus|	retina development in camera-type eye|	None	10	8.64	4.76	9	8.76	4.1	8.7	8.51	0.00625	4.81	17.9	0
ENSG00000140107	SLC25A47	solute carrier family 25, member 47	mitochondrial inner membrane|integral component of membrane|	transmembrane transport|	None	10	-2.5	7.63	10	-1.12	1.96	-1.97	8.49	0.00628	-5.96	-0.45	0
ENSG00000139190	VAMP1	vesicle-associated membrane protein 1 (synaptobrevin 1)	mitochondrial outer membrane|integral component of plasma membrane|cell junction|endocytic vesicle membrane|synaptic vesicle membrane|neuron projection|	synaptic transmission|neurotransmitter secretion|vesicle-mediated transport|	protein binding|	10	8.36	4.8	10	9	4.09	8.91	8.48	0.0063	4.88	17.9	0
ENSG00000075420	FNDC3B	fibronectin type III domain containing 3B	integral component of membrane|	positive regulation of fat cell differentiation|	poly(A) RNA binding|	10	3.27	2.93	10	3.62	5.91	3.58	8.48	0.0063	0.9	8.06	0
ENSG00000071564	TCF3	transcription factor 3	nuclear nucleosome|nuclear chromatin|nucleus|nucleus|nucleoplasm|transcription factor complex|cytoplasm|protein complex|	negative regulation of transcription from RNA polymerase II promoter|natural killer cell differentiation|B cell lineage commitment|B cell lineage commitment|transcription, DNA-templated|regulation of transcription, DNA-templated|B cell differentiation|positive regulation of B cell proliferation|response to lipopolysaccharide|T cell differentiation in thymus|immunoglobulin V(D)J recombination|resp…	RNA polymerase II core promoter proximal region sequence-specific DNA binding|RNA polymerase II core promoter proximal region sequence-specific DNA binding transcription factor activity involved in negative regulation of transcription|DNA binding|DNA binding|DNA binding|chromatin binding|sequence-specific DNA binding transcription factor activity|sequence-specific DNA binding transcription factor…	10	4.46	6.21	10	2.54	3.32	3.58	8.48	0.0063	0.84	7.83	0
ENSG00000110697	PITPNM1	phosphatidylinositol transfer protein, membrane-associated 1	endoplasmic reticulum membrane|lipid particle|membrane|midbody|cleavage furrow|Golgi cisterna membrane|	lipid metabolic process|brain development|phototransduction|protein transport|phospholipid transport|	phosphatidylinositol transporter activity|metal ion binding|	10	-2.44	4.69	10	-1.73	4.39	-2.07	8.48	0.0063	-5.8	-0.45	0
ENSG00000136371	MTHFS	5,10-methenyltetrahydrofolate synthetase (5-formyltetrahydrofolate cyclo-ligase)	cytoplasm|	folic acid-containing compound biosynthetic process|formate metabolic process|tetrahydrofolate metabolic process|	ATP binding|folic acid binding|5-formyltetrahydrofolate cyclo-ligase activity|5-formyltetrahydrofolate cyclo-ligase activity|	7	4.83	4.89	7	4.38	4.01	4.63	8.48	0.0063	1.51	9.86	0
ENSG00000229644	NAMPTL	nicotinamide phosphoribosyltransferase-like	None	None	None	8	4.15	6.22	8	4.73	2.65	4.5	8.47	0.00631	1.17	9.03	0
ENSG00000161551	ZNF577	zinc finger protein 577	nucleus|	transcription, DNA-templated|regulation of transcription, DNA-templated|	DNA binding|sequence-specific DNA binding transcription factor activity|metal ion binding|	10	3.85	4.75	9	3.43	4.17	3.7	8.47	0.00631	1.01	7.49	0
ENSG00000187595	ZNF385C	zinc finger protein 385C	nucleus|	None	nucleic acid binding|zinc ion binding|	10	4.53	4.86	9	6.63	4.22	6.42	8.47	0.00631	1.59	12.4	0
ENSG00000133895	MEN1	multiple endocrine neoplasia I	chromatin|nucleus|nucleoplasm|cytoplasm|cytosol|nuclear matrix|cleavage furrow|histone methyltransferase complex|histone methyltransferase complex|protein complex|	negative regulation of transcription from RNA polymerase II promoter|MAPK cascade|leukocyte homeostasis|negative regulation of protein phosphorylation|osteoblast fate commitment|osteoblast development|DNA repair|chromatin remodeling|transcription, DNA-templated|transcription initiation from RNA polymerase II promoter|cellular response to DNA damage stimulus|cell cycle arrest|transforming growth f…	four-way junction DNA binding|Y-form DNA binding|chromatin binding|double-stranded DNA binding|protein binding|histone-lysine N-methyltransferase activity|protein binding, bridging|sequence-specific DNA binding|transcription regulatory region DNA binding|protein N-terminus binding|R-SMAD binding|	9	-1.31	4.47	9	-1.43	4.37	-1.36	8.47	0.00631	-3.51	-0.27	0
ENSG00000174842	GLMN	glomulin, FKBP associated protein	intracellular|cullin-RING ubiquitin ligase complex|Cul2-RING ubiquitin ligase complex|Cul3-RING ubiquitin ligase complex|Cul4A-RING E3 ubiquitin ligase complex|	vasculogenesis|neural tube closure|negative regulation of protein ubiquitination|regulation of proteasomal ubiquitin-dependent protein catabolic process|regulation of gene expression, epigenetic|negative regulation of T cell proliferation|positive regulation of phosphorylation|muscle cell differentiation|positive regulation of interleukin-2 biosynthetic process|positive regulation of cytokine sec…	hepatocyte growth factor receptor binding|protein binding|ubiquitin protein ligase binding|ubiquitin-protein transferase inhibitor activity|	9	2.57	5.39	9	2.71	3.39	2.67	8.44	0.00636	0.71	5.52	0
ENSG00000152219	ARL14EP	ADP-ribosylation factor-like 14 effector protein	cytoplasm|	None	protein binding|	10	5.05	2.53	10	5.47	6.24	5.41	8.42	0.0064	1.48	11.1	0
ENSG00000160285	LSS	lanosterol synthase (2,3-oxidosqualene-lanosterol cyclase)	endoplasmic reticulum membrane|lipid particle|membrane|	cholesterol biosynthetic process|cholesterol biosynthetic process|steroid metabolic process|small molecule metabolic process|	lanosterol synthase activity|	10	3.08	6.56	10	1.85	2.91	2.78	8.4	0.00643	0.65	5.6	0
ENSG00000124882	EREG	epiregulin	extracellular region|extracellular space|integral component of plasma membrane|	angiogenesis|ovarian cumulus expansion|oocyte maturation|positive regulation of cytokine production|female meiotic division|epidermal growth factor receptor signaling pathway|epidermal growth factor receptor signaling pathway|cell-cell signaling|positive regulation of cell proliferation|positive regulation of cell proliferation|negative regulation of cell proliferation|fibroblast growth factor re…	epidermal growth factor receptor binding|epidermal growth factor receptor binding|protein binding|growth factor activity|	10	-1.34	3.62	10	-1.64	5.18	-1.5	8.38	0.00647	-4.24	-0.24	0
ENSG00000256235	SMIM3	small integral membrane protein 3	integral component of membrane|	None	None	10	3.29	2.4	10	4.64	6.57	3.76	8.38	0.00647	1.06	7.95	0
ENSG00000023287	RB1CC1	RB1-inducible coiled-coil 1	cytoplasm|cytosol|nuclear membrane|pre-autophagosomal structure membrane|ULK1-ATG13-FIP200 complex|	autophagic vacuole assembly|liver development|positive regulation of protein phosphorylation|transcription, DNA-templated|regulation of transcription, DNA-templated|cell cycle|JNK cascade|heart development|regulation of autophagy|negative regulation of apoptotic process|positive regulation of cell size|negative regulation of extrinsic apoptotic signaling pathway|	protein binding|protein kinase binding|	10	-1.46	2.16	10	-1.62	6.54	-1.6	8.37	0.00649	-4.21	-0.31	0
ENSG00000176853	FAM91A1	family with sequence similarity 91, member A1	None	None	None	10	2.33	4.31	10	2.65	4.42	2.42	8.36	0.00652	0.7	5.21	0
ENSG00000115685	PPP1R7	protein phosphatase 1, regulatory subunit 7	nucleus|chromosome|cytoplasm|extracellular vesicular exosome|	biological_process|positive regulation of protein dephosphorylation|regulation of catalytic activity|regulation of catalytic activity|	protein phosphatase type 1 regulator activity|enzyme regulator activity|	8	4	2.39	7	5.19	6.52	4.89	8.35	0.00654	1.25	10.3	0
ENSG00000114353	GNAI2	guanine nucleotide binding protein (G protein), alpha inhibiting activity polypeptide 2	nucleus|cytoplasm|centrosome|cytosol|heterotrimeric G-protein complex|plasma membrane|plasma membrane|membrane|midbody|membrane raft|extracellular vesicular exosome|	activation of MAPKK activity|adenosine receptor signaling pathway|GTP catabolic process|cell cycle|signal transduction|G-protein coupled receptor signaling pathway|adenylate cyclase-inhibiting G-protein coupled receptor signaling pathway|adenylate cyclase-inhibiting G-protein coupled receptor signaling pathway|negative regulation of adenylate cyclase activity|G-protein coupled acetylcholine recep…	G-protein coupled receptor binding|GTPase activity|signal transducer activity|protein binding|GTP binding|G-protein beta/gamma-subunit complex binding|metal ion binding|	10	-1.59	3.3	10	-1.75	5.39	-1.69	8.33	0.00658	-4.35	-0.3	0
ENSG00000127445	PIN1	peptidylprolyl cis/trans isomerase, NIMA-interacting 1	nucleus|nucleoplasm|cytoplasm|nuclear speck|midbody|	protein peptidyl-prolyl isomerization|protein peptidyl-prolyl isomerization|positive regulation of protein phosphorylation|protein folding|cell cycle|regulation of mitosis|cytokine-mediated signaling pathway|negative regulation of transforming growth factor beta receptor signaling pathway|positive regulation of Rho GTPase activity|regulation of cytokinesis|regulation of cytokinesis|negative regul…	peptidyl-prolyl cis-trans isomerase activity|protein binding|mitogen-activated protein kinase kinase binding|GTPase activating protein binding|phosphoserine binding|phosphothreonine binding|phosphothreonine binding|	10	3.05	4.37	10	3.47	4.35	3.17	8.32	0.00659	0.8	6.93	0
ENSG00000175482	POLD4	polymerase (DNA-directed), delta 4, accessory subunit	nucleus|nucleoplasm|	mitotic cell cycle|telomere maintenance via recombination|telomere maintenance|positive regulation of endothelial cell proliferation|DNA replication|DNA strand elongation involved in DNA replication|DNA repair|transcription-coupled nucleotide-excision repair|base-excision repair|nucleotide-excision repair|nucleotide-excision repair, DNA gap filling|telomere maintenance via semi-conservative repli…	DNA-directed DNA polymerase activity|protein binding|	10	4.05	5.15	10	2.65	3.94	3.64	8.32	0.00659	0.85	7.13	0
ENSG00000272410	RP11-438J1.1	N/A	None	None	None	10	2.25	4.29	10	2.49	4.39	2.44	8.31	0.00661	0.63	4.79	0
ENSG00000157600	TMEM164	transmembrane protein 164	integral component of membrane|	None	None	10	4.16	7.24	10	2.49	2.07	3.93	8.3	0.00662	0.76	8.51	0
ENSG00000146701	MDH2	malate dehydrogenase 2, NAD (mitochondrial)	nucleus|mitochondrion|mitochondrial inner membrane|mitochondrial matrix|plasma membrane|extracellular vesicular exosome|	carbohydrate metabolic process|glucose metabolic process|gluconeogenesis|tricarboxylic acid cycle|oxaloacetate metabolic process|malate metabolic process|malate metabolic process|internal protein amino acid acetylation|NADH metabolic process|cellular metabolic process|cellular carbohydrate metabolic process|small molecule metabolic process|	L-malate dehydrogenase activity|L-malate dehydrogenase activity|L-malate dehydrogenase activity|protein self-association|poly(A) RNA binding|malate dehydrogenase (NADP+) activity|	10	-0.8	1.09	10	-1.88	8.26	-1.59	8.29	0.00664	-4.53	-0.31	0
ENSG00000159212	CLIC6	chloride intracellular channel 6	cytoplasm|plasma membrane|chloride channel complex|extracellular vesicular exosome|	regulation of ion transmembrane transport|regulation of anion transport|chloride transmembrane transport|	voltage-gated chloride channel activity|protein C-terminus binding|D2 dopamine receptor binding|D3 dopamine receptor binding|D4 dopamine receptor binding|protein homodimerization activity|	9	3.31	4.06	9	4.52	4.79	3.78	8.26	0.00669	1.07	7.87	0
ENSG00000124067	SLC12A4	solute carrier family 12 (potassium/chloride transporter), member 4	lysosomal membrane|plasma membrane|integral component of plasma membrane|membrane|	transport|ion transport|potassium ion transport|chloride transport|cell volume homeostasis|transmembrane transport|chloride transmembrane transport|chloride transmembrane transport|	potassium:chloride symporter activity|protein kinase binding|	10	-1.02	2.67	10	-1.47	6.06	-1.3	8.23	0.00675	-3.5	-0.25	0
ENSG00000243501	RP11-257K9.8	N/A	None	None	None	10	6.54	2.62	10	4.85	6.2	4.92	8.23	0.00675	1.29	11.2	0
ENSG00000269601	AP000758.1	N/A	None	None	None	2	-1.8	2.72	2	-2.53	5.99	-2.21	8.22	0.00677	-6.67	-0.87	0
ENSG00000166796	LDHC	lactate dehydrogenase C	nucleus|cytoplasm|motile cilium|	glycolytic process|ATP biosynthetic process|lactate biosynthetic process from pyruvate|lactate oxidation|sperm motility|cellular carbohydrate metabolic process|	L-lactate dehydrogenase activity|	10	-1.13	1.94	10	-5.13	9.64	-4.69	8.22	0.00677	-12	-0.57	0
ENSG00000101400	SNTA1	syntrophin, alpha 1	intracellular|cytoplasm|cytoskeleton|syntrophin complex|lateral plasma membrane|cell junction|neuromuscular junction|sarcolemma|protein complex|postsynaptic membrane|	regulation of heart rate|regulation of vasoconstriction by circulating norepinephrine|muscle contraction|neuromuscular junction development|regulation of ventricular cardiac muscle cell membrane repolarization|ventricular cardiac muscle cell action potential|negative regulation of peptidyl-cysteine S-nitrosylation|regulation of sodium ion transmembrane transport|	actin binding|protein binding|calmodulin binding|sodium channel regulator activity|PDZ domain binding|ion channel binding|nitric-oxide synthase binding|ATPase binding|	10	2.91	6.76	10	1.95	2.06	2.66	8.21	0.00679	0.67	5.49	0
ENSG00000125508	SRMS	src-related kinase lacking C-terminal regulatory tyrosine and N-terminal myristylation sites	cytoplasm|	peptidyl-tyrosine autophosphorylation|	protein tyrosine kinase activity|non-membrane spanning protein tyrosine kinase activity|protein binding|ATP binding|	10	3.61	6.43	10	2.11	2.75	3.11	8.2	0.0068	0.74	6.15	0
ENSG00000108381	ASPA	aspartoacylase	nucleus|cytoplasm|extracellular vesicular exosome|	aspartate catabolic process|central nervous system myelination|positive regulation of oligodendrocyte differentiation|	aminoacylase activity|hydrolase activity, acting on ester bonds|aspartoacylase activity|metal ion binding|	10	6.78	2.43	10	6.31	6.12	6.54	8.2	0.0068	2.76	13.5	0
ENSG00000147133	TAF1	TAF1 RNA polymerase II, TATA box binding protein (TBP)-associated factor, 250kDa	nucleus|nucleoplasm|transcription factor TFIID complex|MLL1 complex|	regulation of transcription involved in G2/M transition of mitotic cell cycle|DNA-templated transcription, initiation|transcription from RNA polymerase II promoter|transcription initiation from RNA polymerase II promoter|transcription elongation from RNA polymerase II promoter|cellular response to DNA damage stimulus|gene expression|viral process|histone acetylation|histone acetylation|peptidyl-s…	p53 binding|transcription coactivator activity|histone acetyltransferase activity|protein serine/threonine kinase activity|protein binding|ATP binding|transcription factor binding|TBP-class protein binding|sequence-specific DNA binding|transcription regulatory region DNA binding|lysine-acetylated histone binding|	10	7.62	5.99	10	3.24	4.02	5.66	8.2	0.0068	1.06	12.2	0
ENSG00000137392	CLPS	colipase, pancreatic	extracellular region|extracellular vesicular exosome|	retinoid metabolic process|lipid metabolic process|phototransduction, visible light|lipid catabolic process|positive regulation of catalytic activity|lipid digestion|small molecule metabolic process|	enzyme activator activity|	10	3.8	5.87	10	2.52	3.45	3.28	8.18	0.00684	0.74	6.94	0
ENSG00000183495	EP400	E1A binding protein p400	Swr1 complex|nucleoplasm|nuclear speck|NuA4 histone acetyltransferase complex|	chromatin organization|histone H4 acetylation|histone H2A acetylation|	DNA binding|chromatin binding|helicase activity|ATP binding|	10	-0.59	0.402	9	-2.82	9.59	-2.38	8.17	0.00686	-6.61	-0.53	0
ENSG00000224474	AL355490.1	N/A	None	None	None	6	3.6	3.29	6	3.96	5.24	3.81	8.15	0.00691	1.04	8.34	0
ENSG00000023041	ZDHHC6	zinc finger, DHHC-type containing 6	endoplasmic reticulum|endoplasmic reticulum membrane|integral component of membrane|	protein palmitoylation|	zinc ion binding|palmitoyltransferase activity|protein-cysteine S-palmitoyltransferase activity|	10	6.97	5.69	10	5.73	2.9	5.68	8.15	0.00691	1.29	12.8	0
ENSG00000188176	SMTNL2	smoothelin-like 2	None	None	None	10	3.65	6.4	10	2.16	2.48	3	8.14	0.00693	0.71	6.28	0
ENSG00000124249	KCNK15	potassium channel, subfamily K, member 15	integral component of membrane|	regulation of ion transmembrane transport|potassium ion transmembrane transport|	potassium channel activity|	9	7.77	6.6	9	5.72	2.03	7.07	8.13	0.00695	1.35	14.2	0
ENSG00000135999	EPC2	enhancer of polycomb homolog 2 (Drosophila)	Piccolo NuA4 histone acetyltransferase complex|	DNA repair|transcription, DNA-templated|regulation of transcription, DNA-templated|chromatin modification|	None	10	-1.36	4.6	10	-1.34	3.89	-1.35	8.13	0.00695	-4.89	0.07	0
ENSG00000086712	TXLNG	taxilin gamma	cytosol|nuclear membrane|	transcription, DNA-templated|regulation of transcription, DNA-templated|cell cycle|regulation of cell cycle process|regulation of bone mineralization|regulation of cell cycle|	syntaxin binding|protein heterodimerization activity|	10	3.9	6.38	10	3.03	2.3	3.68	8.13	0.00695	0.94	7.1	0
ENSG00000000419	DPM1	dolichyl-phosphate mannosyltransferase polypeptide 1, catalytic subunit	nucleus|endoplasmic reticulum|endoplasmic reticulum membrane|endoplasmic reticulum membrane|membrane|dolichol-phosphate-mannose synthase complex|	dolichol-linked oligosaccharide biosynthetic process|C-terminal protein lipidation|GPI anchor biosynthetic process|protein N-linked glycosylation via asparagine|dolichol metabolic process|GDP-mannose metabolic process|protein mannosylation|protein O-linked mannosylation|post-translational protein modification|cellular protein metabolic process|	dolichyl-phosphate-mannose-protein mannosyltransferase activity|dolichyl-phosphate beta-D-mannosyltransferase activity|protein binding|mannose binding|alcohol binding|	10	-1.08	1.97	10	-1.7	6.74	-1.5	8.12	0.00697	-4.11	-0.25	0
ENSG00000260861	RP4-576H24.4	N/A	None	None	None	10	5.24	7.17	10	2.11	1.65	4.81	8.12	0.00697	1.11	9.36	0
ENSG00000116133	DHCR24	24-dehydrocholesterol reductase	Golgi membrane|nucleus|endoplasmic reticulum|endoplasmic reticulum membrane|endoplasmic reticulum membrane|cytosol|cytoskeleton|membrane|integral component of membrane|	cholesterol biosynthetic process|cholesterol biosynthetic process|cholesterol biosynthetic process|cholesterol biosynthetic process|cholesterol biosynthetic process|apoptotic process|response to oxidative stress|cell cycle arrest|Ras protein signal transduction|protein localization|negative regulation of cell proliferation|response to hormone|tissue development|male genitalia development|plasmino…	UDP-N-acetylmuramate dehydrogenase activity|oxidoreductase activity, acting on the CH-CH group of donors, NAD or NADP as acceptor|enzyme binding|peptide antigen binding|delta24-sterol reductase activity|flavin adenine dinucleotide binding|	10	-1.21	4.23	10	-1.36	4.24	-1.29	8.09	0.00703	-3.41	-0.19	0
ENSG00000162738	VANGL2	VANGL planar cell polarity protein 2	plasma membrane|cell-cell junction|integral component of membrane|basolateral plasma membrane|apical plasma membrane|lateral plasma membrane|cell pole|	establishment of planar polarity|neural tube closure|hair follicle development|heart looping|membranous septum morphogenesis|muscular septum morphogenesis|planar cell polarity pathway involved in axis elongation|Rho protein signal transduction|anterior/posterior pattern specification|convergent extension involved in neural plate elongation|glomerulus development|regulation of actin cytoskeleton o…	None	9	3.88	4.71	9	7.22	5.01	4.4	8.08	0.00704	1.19	12.4	0
ENSG00000112308	C6ORF62	chromosome 6 open reading frame 62	intracellular|	biological_process|	molecular_function|	10	4.07	4.84	10	5.01	3.79	4.75	8.08	0.00704	0.99	9.28	0
ENSG00000123136	DDX39A	DEAD (Asp-Glu-Ala-Asp) box polypeptide 39A	nucleus|cytoplasm|membrane|	mRNA splicing, via spliceosome|mRNA export from nucleus|	helicase activity|protein binding|ATP binding|poly(A) RNA binding|	10	-0.7	0.524	10	-1.89	8.5	-1.5	8.07	0.00707	-5.54	-0.11	0
ENSG00000155034	FBXL18	F-box and leucine-rich repeat protein 18	None	None	None	10	-1.06	1.37	10	-1.96	7.55	-1.63	8.07	0.00707	-4.77	-0.25	0
ENSG00000185467	KPNA7	karyopherin alpha 7 (importin alpha 8)	nucleoplasm|cytosol|	protein import into nucleus|cytokine-mediated signaling pathway|	protein transporter activity|	10	-0.86	1.09	10	-1.79	7.73	-1.45	8.07	0.00707	-4.03	-0.28	0
ENSG00000169919	GUSB	glucuronidase, beta	membrane|lysosomal lumen|intracellular membrane-bounded organelle|extracellular vesicular exosome|	carbohydrate metabolic process|glycosaminoglycan catabolic process|glycosaminoglycan metabolic process|hyaluronan metabolic process|hyaluronan catabolic process|small molecule metabolic process|	beta-glucuronidase activity|	10	8.65	4.54	10	8.29	3.89	8.49	8.07	0.00707	2.61	16.7	0
ENSG00000125834	STK35	serine/threonine kinase 35	nucleolus|cytoplasm|	protein phosphorylation|	protein serine/threonine kinase activity|ATP binding|	10	3.49	4.98	10	3.55	3.42	3.53	8.06	0.00708	0.83	7.1	0
ENSG00000123908	AGO2	argonaute RISC catalytic component 2	cytoplasmic mRNA processing body|nucleus|cytoplasm|cytosol|polysome|mRNA cap binding complex|membrane|RISC complex|ribonucleoprotein complex|micro-ribonucleoprotein complex|	transcription, DNA-templated|regulation of transcription, DNA-templated|translation|translational initiation|epidermal growth factor receptor signaling pathway|Notch signaling pathway|fibroblast growth factor receptor signaling pathway|post-embryonic development|gene expression|gene silencing by RNA|pre-miRNA processing|negative regulation of translation involved in gene silencing by miRNA|negati…	RNA 7-methylguanosine cap binding|mRNA binding|translation initiation factor activity|endoribonuclease activity|protein binding|siRNA binding|siRNA binding|miRNA binding|poly(A) RNA binding|metal ion binding|endoribonuclease activity, cleaving siRNA-paired mRNA|	9	2.61	3.85	9	2.38	4.59	2.45	8.06	0.00708	0.56	5.34	0
ENSG00000100399	CHADL	chondroadherin-like	proteinaceous extracellular matrix|extracellular matrix|	None	None	9	6.47	4.97	9	3.54	3.82	3.68	8.05	0.0071	0.8	10.1	0
ENSG00000104774	MAN2B1	mannosidase, alpha, class 2B, member 1	lysosome|extracellular vesicular exosome|	mannose metabolic process|cellular protein modification process|protein deglycosylation|	alpha-mannosidase activity|zinc ion binding|carbohydrate binding|	10	3.28	6.87	10	1.74	2.14	2.77	8.05	0.0071	0.68	5.67	0
ENSG00000174744	BRMS1	breast cancer metastasis suppressor 1	nucleus|cytoplasm|	transcription, DNA-templated|apoptotic process|negative regulation of NF-kappaB transcription factor activity|negative regulation of transcription, DNA-templated|positive regulation of protein deacetylation|positive regulation of anoikis|	protein binding|NF-kappaB binding|	9	6.56	4.83	9	2.84	3.78	5.04	8.03	0.00715	0.93	11.4	0
ENSG00000268702	AL049829.1	N/A	None	None	None	6	1.58	1.43	8	-2.91	9.94	-2.6	8.03	0.00715	-7.49	-0.93	0
ENSG00000139914	FITM1	fat storage-inducing transmembrane protein 1	endoplasmic reticulum membrane|integral component of endoplasmic reticulum membrane|	positive regulation of sequestering of triglyceride|lipid particle organization|	molecular_function|	10	4.49	6.78	10	3.73	1.69	4.06	8.03	0.00715	0.98	9.12	0
ENSG00000111981	ULBP1	UL16 binding protein 1	endoplasmic reticulum|plasma membrane|anchored component of plasma membrane|	antigen processing and presentation|natural killer cell activation|natural killer cell mediated cytotoxicity|regulation of immune response|	natural killer cell lectin-like receptor binding|	10	2.77	3.73	10	2.53	4.66	2.69	8.02	0.00716	0.53	6.94	0
ENSG00000180694	TMEM64	transmembrane protein 64	endoplasmic reticulum|integral component of membrane|	regulation of ATPase activity|positive regulation of osteoclast differentiation|positive regulation of bone resorption|cytosolic calcium ion homeostasis|	None	10	4.24	6.78	10	2.03	2.38	3.09	8.02	0.00716	0.77	7.4	0
ENSG00000176974	SHMT1	serine hydroxymethyltransferase 1 (soluble)	nucleus|cytoplasm|mitochondrion|cytosol|cytosol|extracellular vesicular exosome|	L-serine catabolic process|vitamin metabolic process|water-soluble vitamin metabolic process|purine nucleobase biosynthetic process|glycine biosynthetic process from serine|cellular nitrogen compound metabolic process|tetrahydrofolate interconversion|small molecule metabolic process|carnitine biosynthetic process|folic acid metabolic process|folic acid metabolic process|protein tetramerization|pr…	glycine hydroxymethyltransferase activity|glycine hydroxymethyltransferase activity|L-allo-threonine aldolase activity|amino acid binding|pyridoxal phosphate binding|protein homodimerization activity|	9	0.38	0.045	8	-5.39	11	-5.08	8.01	0.00718	-13	-2.74	0
ENSG00000261717	RP11-77K12.1	N/A	None	None	None	10	3.24	3.9	10	3.54	4.5	3.39	8	0.0072	0.82	6.98	0
ENSG00000243725	TTC4	tetratricopeptide repeat domain 4	None	None	None	9	5.2	3.96	10	5.53	4.4	5.45	8	0.0072	1.69	11.1	0
ENSG00000149357	LAMTOR1	late endosomal/lysosomal adaptor, MAPK and MTOR activator 1	lysosome|lysosomal membrane|Golgi apparatus|plasma membrane|late endosome membrane|intracellular membrane-bounded organelle|membrane raft|extracellular vesicular exosome|Ragulator complex|	regulation of receptor recycling|endosome organization|lysosome organization|regulation of cholesterol esterification|regulation of cholesterol efflux|cell growth|positive regulation of TOR signaling|lysosome localization|endosome localization|cellular protein localization|cholesterol homeostasis|positive regulation of MAPK cascade|positive regulation of GTPase activity|regulation of cholesterol …	guanyl-nucleotide exchange factor activity|protein binding|protein complex scaffold|	10	4.12	4.4	10	4.95	4.02	4.79	7.99	0.00723	1.2	9.57	0
ENSG00000177212	OR2T33	olfactory receptor, family 2, subfamily T, member 33	plasma membrane|integral component of membrane|	G-protein coupled receptor signaling pathway|detection of chemical stimulus involved in sensory perception of smell|	G-protein coupled receptor activity|olfactory receptor activity|	10	6.58	8.26	10	3.51	1.13	5.48	7.98	0.00725	1.16	12.5	0
ENSG00000180979	LRRC57	leucine rich repeat containing 57	extracellular vesicular exosome|	None	None	10	-1.21	2.53	10	-1.44	5.83	-1.34	7.98	0.00725	-3.77	-0.24	0
ENSG00000124203	ZNF831	zinc finger protein 831	None	None	nucleic acid binding|metal ion binding|	10	3.75	3.89	10	3.78	4.41	3.77	7.95	0.00732	0.82	8.22	0
ENSG00000077097	TOP2B	topoisomerase (DNA) II beta 180kDa	heterochromatin|nucleus|nucleoplasm|cytoplasm|cytosol|DNA topoisomerase complex (ATP-hydrolyzing)|	resolution of meiotic recombination intermediates|sister chromatid segregation|neuron migration|ATP catabolic process|ATP catabolic process|DNA topological change|DNA unwinding involved in DNA replication|mitotic recombination|axonogenesis|forebrain development|mitotic DNA integrity checkpoint|	chromatin binding|DNA topoisomerase type II (ATP-hydrolyzing) activity|protein kinase C binding|ATP binding|protein C-terminus binding|DNA binding, bending|enzyme binding|histone deacetylase binding|metal ion binding|protein heterodimerization activity|	10	4.05	6.32	10	3.19	2.19	3.46	7.94	0.00734	0.82	7.18	0
ENSG00000257207	LIMS3	LIM and senescent cell antigen-like domains 3	cytoplasm|	None	zinc ion binding|	10	3.36	4.46	10	3	3.86	3.35	7.93	0.00736	0.68	6.96	0
ENSG00000180346	TIGD2	tigger transposable element derived 2	nucleus|	None	DNA binding|	10	3.18	2.89	10	4.29	5.47	3.19	7.92	0.00739	0.63	7.53	0
ENSG00000158458	NRG2	neuregulin 2	extracellular region|plasma membrane|integral component of membrane|	signal transduction|epidermal growth factor receptor signaling pathway|fibroblast growth factor receptor signaling pathway|embryo development|Fc-epsilon receptor signaling pathway|innate immune response|neurotrophin TRK receptor signaling pathway|phosphatidylinositol-mediated signaling|	receptor binding|growth factor activity|	10	5.56	6.53	10	3.22	2.48	4.86	7.91	0.00741	1.61	10.3	0
ENSG00000103375	AQP8	aquaporin 8	plasma membrane|integral component of plasma membrane|intracellular membrane-bounded organelle|apical part of cell|intracellular canaliculus|	transport|water transport|canalicular bile acid transport|transmembrane transport|cellular response to cAMP|	water channel activity|	9	3.28	5.4	10	4.42	3.11	3.88	7.9	0.00743	0.81	7.89	0
ENSG00000185133	INPP5J	inositol polyphosphate-5-phosphatase J	ruffle|cytoplasm|cytosol|plasma membrane|growth cone|dendritic shaft|	phospholipid metabolic process|phosphatidylinositol biosynthetic process|negative regulation of neuron projection development|negative regulation of microtubule polymerization|negative regulation of peptidyl-serine phosphorylation|inositol phosphate metabolic process|small molecule metabolic process|phosphatidylinositol dephosphorylation|	inositol-polyphosphate 5-phosphatase activity|SH3 domain binding|phosphatidylinositol-3,4,5-trisphosphate 5-phosphatase activity|inositol-1,4,5-trisphosphate 5-phosphatase activity|inositol-1,3,4,5-tetrakisphosphate 5-phosphatase activity|	8	-2.03	7.73	8	-0.96	0.822	-1.82	7.9	0.00743	-5.36	-0.29	0
ENSG00000118898	PPL	periplakin	nucleus|mitochondrion|cytoskeleton|plasma membrane|desmosome|extracellular vesicular exosome|	keratinization|	structural constituent of cytoskeleton|protein binding|	10	2.62	3.72	10	2.47	4.52	2.6	7.89	0.00746	0.55	5.33	0
ENSG00000151532	VTI1A	vesicle transport through interaction with t-SNAREs 1A	Golgi membrane|Golgi apparatus|integral component of membrane|cytoplasmic membrane-bounded vesicle|SNARE complex|	intracellular protein transport|retrograde transport, endosome to Golgi|retrograde transport, endosome to Golgi|	SNAP receptor activity|	10	-3.28	9.95	10	-0.41	0.215	-3	7.89	0.00746	-8.83	-0.9	0
ENSG00000178974	FBXO34	F-box protein 34	None	None	None	10	-2.62	9.51	10	3.28	0.568	-2.29	7.89	0.00746	-7.65	-0.47	0
ENSG00000204899	MZT1	mitotic spindle organizing protein 1	centrosome|spindle|gamma-tubulin ring complex|	gamma-tubulin complex localization|	protein binding|	9	7.08	7.14	9	4.52	1.52	6.02	7.88	0.00749	1.69	13.3	0
ENSG00000105193	RPS16	ribosomal protein S16	cytosol|small ribosomal subunit|membrane|cytosolic small ribosomal subunit|cytosolic small ribosomal subunit|extracellular vesicular exosome|	nuclear-transcribed mRNA catabolic process, nonsense-mediated decay|rRNA processing|translation|translation|translation|translational initiation|translational elongation|translational termination|SRP-dependent cotranslational protein targeting to membrane|gene expression|viral process|RNA metabolic process|mRNA metabolic process|viral life cycle|viral transcription|ribosomal small subunit biogene…	RNA binding|structural constituent of ribosome|protein binding|poly(A) RNA binding|	3	5.77	3.05	2	6.66	5.16	6.43	7.86	0.00753	3.42	13	0
ENSG00000177731	FLII	flightless I homolog (Drosophila)	nucleus|cytoplasm|microtubule organizing center|focal adhesion|	transcription, DNA-templated|regulation of transcription, DNA-templated|muscle contraction|multicellular organismal development|	actin binding|protein binding|	10	2.69	4.08	10	1.94	4.19	2.1	7.85	0.00755	0.46	5.1	0
ENSG00000134802	SLC43A3	solute carrier family 43, member 3	cellular_component|integral component of membrane|	biological_process|transmembrane transport|	molecular_function|	10	3.18	3.9	10	4.71	4.72	3.96	7.85	0.00755	0.96	8.32	0
ENSG00000133195	SLC39A11	solute carrier family 39, member 11	integral component of membrane|	zinc ion transport|transmembrane transport|	metal ion transmembrane transporter activity|	10	2.65	2.18	10	3.63	6.07	3.55	7.85	0.00755	0.82	7.12	0
ENSG00000167543	TP53I13	tumor protein p53 inducible protein 13	cytoplasm|plasma membrane|integral component of membrane|	None	None	9	3.93	3.34	9	4.36	4.89	4.17	7.84	0.00757	0.99	9.66	0
ENSG00000173442	EHBP1L1	EH domain binding protein 1-like 1	cellular_component|membrane|	biological_process|	molecular_function|	10	-1.11	2.81	10	-1.5	5.53	-1.3	7.84	0.00757	-3.71	-0.17	0
ENSG00000050767	COL23A1	collagen, type XXIII, alpha 1	collagen trimer|endoplasmic reticulum lumen|plasma membrane|integral component of membrane|	extracellular matrix disassembly|extracellular matrix organization|collagen catabolic process|	None	10	9.36	6.02	10	8.12	2.41	8.85	7.84	0.00757	4.7	19.8	0
ENSG00000178821	TMEM52	transmembrane protein 52	integral component of membrane|	None	None	10	5.63	4.83	9	3.35	3.85	4.61	7.83	0.0076	1.01	9.42	0
ENSG00000204227	RING1	ring finger protein 1	sex chromatin|nucleus|nucleoplasm|cytoplasm|nuclear speck|PcG protein complex|PRC1 complex|	transcription, DNA-templated|anterior/posterior pattern specification|histone H2A monoubiquitination|negative regulation of transcription, DNA-templated|camera-type eye morphogenesis|	chromatin binding|ubiquitin-protein transferase activity|protein binding|zinc ion binding|ligase activity|	10	-2.9	7.15	10	-1.57	1.58	-2.57	7.83	0.0076	-7.5	-0.61	0
ENSG00000133639	BTG1	B-cell translocation gene 1, anti-proliferative	nucleus|nucleus|cytoplasm|cytoplasm|	regulation of transcription, DNA-templated|negative regulation of cell proliferation|cell migration|negative regulation of cell growth|positive regulation of endothelial cell differentiation|positive regulation of myoblast differentiation|positive regulation of myoblast differentiation|positive regulation of angiogenesis|positive regulation of fibroblast apoptotic process|	transcription cofactor activity|protein binding|enzyme binding|kinase binding|	10	3.49	4	10	4.14	4.32	3.88	7.83	0.0076	0.99	8.03	0
ENSG00000260272	RP11-20I23.1	N/A	None	None	None	8	-1.02	1.3	6	-2.77	7.88	-2.35	7.82	0.00761	-7.21	-0.52	0
ENSG00000080815	PSEN1	presenilin 1	Golgi membrane|kinetochore|nuclear outer membrane|mitochondrion|mitochondrial inner membrane|lysosomal membrane|endoplasmic reticulum|endoplasmic reticulum membrane|smooth endoplasmic reticulum|rough endoplasmic reticulum|Golgi apparatus|centrosome|integral component of plasma membrane|cell cortex|cell surface|membrane|integral component of membrane|apical plasma membrane|Z disc|axon|growth cone|…	autophagic vacuole assembly|negative regulation of transcription from RNA polymerase II promoter|activation of MAPKK activity|blood vessel development|cell fate specification|somitogenesis|neuron migration|positive regulation of receptor recycling|heart looping|hematopoietic progenitor cell differentiation|T cell activation involved in immune response|myeloid leukocyte differentiation|protein gly…	endopeptidase activity|aspartic-type endopeptidase activity|calcium channel activity|protein binding|beta-catenin binding|PDZ domain binding|cadherin binding|	10	-2.76	8.61	10	-0.79	0.908	-2.02	7.81	0.00764	-7.18	-0.4	0
ENSG00000133597	ADCK2	aarF domain containing kinase 2	mitochondrion|integral component of membrane|	protein phosphorylation|	protein serine/threonine kinase activity|ATP binding|	10	11	6.18	10	8.06	2.69	10.1	7.81	0.00764	6.14	21.6	0
ENSG00000022976	ZNF839	zinc finger protein 839	None	None	metal ion binding|	10	2.73	3.64	10	3.66	4.6	3.53	7.8	0.00766	0.8	7.04	0
ENSG00000124205	EDN3	endothelin 3	extracellular region|extracellular space|	neural crest cell migration|positive regulation of leukocyte chemotaxis|regulation of systemic arterial blood pressure by endothelin|signal transduction|cell surface receptor signaling pathway|cell-cell signaling|multicellular organismal development|blood circulation|positive regulation of cell proliferation|positive regulation of heart rate|vein smooth muscle contraction|regulation of vasoconstr…	receptor binding|hormone activity|	10	3.91	4.53	10	3.5	3.66	3.7	7.79	0.00769	0.6	8.1	0
ENSG00000185990	F8A3	coagulation factor VIII-associated 3	nucleus|	biological_process|	molecular_function|	7	6.6	1.91	8	6.1	6.24	6.42	7.79	0.00769	3.19	13.4	0
ENSG00000075624	ACTB	actin, beta	nuclear chromatin|extracellular space|nucleoplasm|cytoplasm|cytosol|cytoskeleton|postsynaptic density|membrane|axon|ribonucleoprotein complex|cortical cytoskeleton|NuA4 histone acetyltransferase complex|cytoplasmic ribonucleoprotein granule|protein complex|extracellular vesicular exosome|MLL5-L complex|blood microparticle|	retina homeostasis|chromatin organization|protein folding|cellular component movement|axon guidance|blood coagulation|substantia nigra development|cell junction assembly|adherens junction organization|Fc-gamma receptor signaling pathway involved in phagocytosis|ATP-dependent chromatin remodeling|cellular protein metabolic process|innate immune response|cell-cell junction organization|'de novo' po…	RNA polymerase II core promoter proximal region sequence-specific DNA binding|RNA polymerase II distal enhancer sequence-specific DNA binding|structural constituent of cytoskeleton|protein binding|ATP binding|kinesin binding|protein kinase binding|Tat protein binding|nucleosomal DNA binding|nitric-oxide synthase binding|	7	2.52	3.19	7	3.45	5.19	3.15	7.78	0.00772	0.57	7.67	0
ENSG00000135363	LMO2	LIM domain only 2 (rhombotin-like 1)	nucleus|transcription factor complex|	multicellular organismal development|embryonic hemopoiesis|mRNA transcription from RNA polymerase II promoter|negative regulation of erythrocyte differentiation|positive regulation of transcription from RNA polymerase II promoter|cellular response to thyroid hormone stimulus|	RNA polymerase II regulatory region sequence-specific DNA binding|sequence-specific DNA binding RNA polymerase II transcription factor activity|RNA polymerase II activating transcription factor binding|RNA polymerase II transcription factor binding transcription factor activity involved in positive regulation of transcription|RNA polymerase II transcription regulatory region sequence-specific DNA…	7	3.53	4.31	7	3.1	3.85	3.42	7.77	0.00774	0.87	7.45	0
ENSG00000092036	HAUS4	HAUS augmin-like complex, subunit 4	cytoplasm|centrosome|spindle|microtubule|HAUS complex|	mitotic nuclear division|spindle assembly|centrosome organization|	molecular_function|	8	2.97	2.67	8	3.95	5.73	3.7	7.77	0.00774	0.71	8.44	0
ENSG00000132466	ANKRD17	ankyrin repeat domain 17	nucleus|cytoplasm|membrane|	blood vessel maturation|viral process|negative regulation of smooth muscle cell differentiation|	poly(A) RNA binding|	9	2.66	2.84	9	2.67	5.25	2.67	7.75	0.00779	0.57	5.83	0
ENSG00000184058	TBX1	T-box 1	nucleus|	angiogenesis|blood vessel development|cell fate specification|neural crest cell migration|positive regulation of protein phosphorylation|lymph vessel development|blood vessel remodeling|positive regulation of mesenchymal cell proliferation|heart morphogenesis|outflow tract septum morphogenesis|outflow tract morphogenesis|transcription, DNA-templated|regulation of transcription from RNA polymerase…	DNA binding|protein homodimerization activity|sequence-specific DNA binding|protein dimerization activity|	7	4.25	7.91	7	1.91	1.09	3.41	7.75	0.00779	0.92	8.63	0
ENSG00000257704	PRR24	proline rich 24	integral component of membrane|	None	None	10	4.23	2.28	9	5.78	5.86	5.68	7.74	0.00782	1.11	11	0
ENSG00000007341	ST7L	suppression of tumorigenicity 7 like	integral component of membrane|	negative regulation of cell growth|	None	10	4.37	3.78	10	4.14	4.34	4.3	7.73	0.00785	0.82	9.54	0
ENSG00000153832	FBXO36	F-box protein 36	None	None	None	10	3.89	5.26	10	2.23	3.28	3.28	7.73	0.00785	0.7	6.6	0
ENSG00000178927	C17ORF62	chromosome 17 open reading frame 62	integral component of membrane|	None	protein binding|	10	3.52	3.24	9	3.84	4.85	3.74	7.72	0.00788	0.74	7.41	0
ENSG00000127920	GNG11	guanine nucleotide binding protein (G protein), gamma 11	heterotrimeric G-protein complex|plasma membrane|	energy reserve metabolic process|GTP catabolic process|signal transduction|G-protein coupled receptor signaling pathway|small molecule metabolic process|cellular response to glucagon stimulus|	GTPase activity|signal transducer activity|	6	-1.68	4.05	6	-2.11	4.1	-1.89	7.69	0.00796	-6.58	-0.28	0
ENSG00000186732	MPPED1	metallophosphoesterase domain containing 1	cellular_component|	biological_process|metabolic process|	molecular_function|hydrolase activity|	10	-2.87	10.3	10	1.38	0.619	-2.55	7.69	0.00796	-8.43	-0.66	0
ENSG00000073009	IKBKG	inhibitor of kappa light polypeptide gene enhancer in B-cells, kinase gamma	intracellular|nucleus|cytoplasm|cytosol|IkappaB kinase complex|IkappaB kinase complex|IkappaB kinase complex|	activation of MAPK activity|B cell homeostasis|toll-like receptor signaling pathway|MyD88-dependent toll-like receptor signaling pathway|MyD88-independent toll-like receptor signaling pathway|transcription, DNA-templated|apoptotic process|inflammatory response|immune response|cellular response to DNA damage stimulus|I-kappaB kinase/NF-kappaB signaling|activation of NF-kappaB-inducing kinase activ…	signal transducer activity|protein binding|protein domain specific binding|protein homodimerization activity|metal ion binding|protein heterodimerization activity|	10	5.42	5.82	10	3.21	2.39	4.58	7.68	0.008	1.14	10.2	0
ENSG00000184640	2017-09-09	septin 9	stress fiber|cytoplasm|microtubule|actin cytoskeleton|perinuclear region of cytoplasm|	GTP catabolic process|cell cycle|protein heterooligomerization|cell division|	GTPase activity|protein binding|GTP binding|	10	-1.63	6.82	10	-0.95	1.47	-1.47	7.68	0.008	-4.7	-0.08	0
ENSG00000109971	HSPA8	heat shock 70kDa protein 8	Prp19 complex|extracellular space|intracellular|nucleus|spliceosomal complex|nucleolus|cytosol|cytosol|plasma membrane|membrane|ribonucleoprotein complex|melanosome|clathrin-sculpted gamma-aminobutyric acid transport vesicle membrane|extracellular vesicular exosome|blood microparticle|	ATP catabolic process|transcription, DNA-templated|mRNA processing|protein folding|post-Golgi vesicle-mediated transport|response to unfolded protein|synaptic transmission|neurotransmitter secretion|axon guidance|RNA splicing|gene expression|viral process|RNA metabolic process|mRNA metabolic process|protein refolding|negative regulation of transcription, DNA-templated|chaperone mediated protein f…	protein binding|ATP binding|ATPase activity|enzyme binding|MHC class II protein complex binding|heat shock protein binding|ATPase activity, coupled|poly(A) RNA binding|unfolded protein binding|	4	6.25	3.12	6	8.2	5.05	7	7.67	0.00802	3.16	16.3	0
ENSG00000112486	CCR6	chemokine (C-C motif) receptor 6	plasma membrane|integral component of plasma membrane|	dendritic cell chemotaxis|cellular component movement|chemotaxis|immune response|humoral immune response|cellular defense response|signal transduction|G-protein coupled receptor signaling pathway|positive regulation of cytosolic calcium ion concentration|innate immune response|chemokine-mediated signaling pathway|chemokine-mediated signaling pathway|	receptor activity|chemokine receptor activity|C-C chemokine receptor activity|	10	2.5	4.76	10	2.79	3.26	2.7	7.67	0.00802	0.56	6.16	0
ENSG00000042832	TG	thyroglobulin	extracellular region|extracellular space|	thyroid hormone generation|signal transduction|iodide transport|thyroid gland development|regulation of myelination|hormone biosynthetic process|	hormone activity|	10	0.99	0.313	10	-2.13	9.13	-1.8	7.66	0.00804	-6.81	-0.15	0
ENSG00000162419	GMEB1	glucocorticoid modulatory element binding protein 1	nucleus|cytoplasm|	transcription, DNA-templated|regulation of transcription, DNA-templated|	DNA binding|sequence-specific DNA binding transcription factor activity|transcription coactivator activity|metal ion binding|	8	2.19	1.65	9	4.05	6.57	3.86	7.65	0.00807	0.78	8.29	0
ENSG00000081154	PCNP	PEST proteolytic signal containing nuclear protein	nucleus|	cell cycle|protein ubiquitination|proteasome-mediated ubiquitin-dependent protein catabolic process|	protein binding|	10	3.28	3.96	10	2.7	4.11	3.07	7.64	0.0081	0.4	9.14	0
ENSG00000267631	CGB1	chorionic gonadotropin, beta polypeptide 1	extracellular region|	None	hormone activity|	9	3.6	6.89	9	3.29	1.06	3.43	7.64	0.0081	0.72	7.26	0
ENSG00000141380	SS18	synovial sarcoma translocation, chromosome 18	nucleus|cytoplasmic microtubule|	microtubule cytoskeleton organization|cell morphogenesis|transcription, DNA-templated|response to drug|positive regulation of transcription from RNA polymerase II promoter|ephrin receptor signaling pathway|	protein binding|ligand-dependent nuclear receptor transcription coactivator activity|	9	-1.55	5.17	9	-1.43	2.81	-1.5	7.64	0.0081	-4.17	-0.2	0
ENSG00000176444	CLK2	CDC-like kinase 2	nucleus|nuclear speck|	protein phosphorylation|response to ionizing radiation|peptidyl-tyrosine phosphorylation|response to retinoic acid|regulation of RNA splicing|negative regulation of gluconeogenesis|protein autophosphorylation|	protein serine/threonine kinase activity|protein serine/threonine/tyrosine kinase activity|protein tyrosine kinase activity|protein binding|ATP binding|	9	3.47	6.74	9	1.65	1.76	2.64	7.64	0.0081	0.55	6.53	0
ENSG00000273003	RP11-399J13.3	N/A	None	None	None	3	4.59	4.96	4	6.04	3.18	4.81	7.62	0.00815	2.04	11.5	0
ENSG00000077684	JADE1	jade family PHD finger 1	histone acetyltransferase complex|nucleus|nucleoplasm|cytoplasm|plasma membrane|intercellular bridge|	chromatin organization|transcription, DNA-templated|apoptotic process|response to stress|negative regulation of cell growth|histone H3 acetylation|histone H4-K5 acetylation|histone H4-K8 acetylation|histone H4-K12 acetylation|positive regulation of transcription from RNA polymerase II promoter|negative regulation of G1/S transition of mitotic cell cycle|	RNA polymerase II transcription coactivator activity|protein binding|zinc ion binding|	10	-1.37	3.83	10	-1.44	4.13	-1.4	7.62	0.00815	-4.7	4.73	0
ENSG00000151135	C12ORF23	N/A	None	None	None	10	2.75	4.33	10	2.01	3.74	2.17	7.61	0.00819	0.32	5.58	0
ENSG00000221888	OR1C1	olfactory receptor, family 1, subfamily C, member 1	plasma membrane|integral component of membrane|	G-protein coupled receptor signaling pathway|sensory perception of smell|detection of chemical stimulus involved in sensory perception of smell|detection of chemical stimulus involved in sensory perception of smell|	G-protein coupled receptor activity|olfactory receptor activity|	8	3.55	5.24	8	2.58	3.2	3.08	7.61	0.00819	0.63	8.07	0
ENSG00000101638	ST8SIA5	ST8 alpha-N-acetyl-neuraminide alpha-2,8-sialyltransferase 5	integral component of Golgi membrane|	carbohydrate metabolic process|protein glycosylation|glycosphingolipid biosynthetic process|sialylation|sialylation|	alpha-N-acetylneuraminate alpha-2,8-sialyltransferase activity|sialyltransferase activity|	10	4.43	5.48	10	4.18	2.45	4.34	7.6	0.00821	1.09	8.57	0
ENSG00000250067	YJEFN3	YjeF N-terminal domain containing 3	None	None	None	10	2.74	4.51	10	2.52	3.46	2.58	7.6	0.00821	0.55	6.35	0
ENSG00000151458	ANKRD50	ankyrin repeat domain 50	None	None	protein binding|	10	4.52	3.68	10	4.24	4.26	4.51	7.58	0.00827	1.33	9.46	0
ENSG00000130224	LRCH2	leucine-rich repeats and calponin homology (CH) domain containing 2	None	None	None	9	9.02	5.24	9	5.47	3.94	7.04	7.57	0.0083	1.1	17.9	0
ENSG00000196182	STK40	serine/threonine kinase 40	nucleus|cytoplasm|	protein phosphorylation|	protein serine/threonine kinase activity|protein binding|ATP binding|	8	3.84	7.07	10	2.23	1.48	3.23	7.57	0.0083	0.63	7.41	0
ENSG00000106009	BRAT1	BRCA1-associated ATM activator 1	nucleus|membrane|	response to ionizing radiation|	protein binding|	10	-1.11	2.35	10	-1.55	5.69	-1.34	7.57	0.0083	-3.69	-0.17	0
ENSG00000197991	PCDH20	protocadherin 20	plasma membrane|integral component of membrane|	homophilic cell adhesion|	calcium ion binding|poly(A) RNA binding|	10	2.86	3.8	10	2.8	4.1	2.83	7.55	0.00836	0.53	5.89	0
ENSG00000234068	PAGE2	P antigen family, member 2 (prostate associated)	None	None	None	10	4.39	7.26	10	1.42	1.3	4.04	7.54	0.00838	0.87	8.18	0
ENSG00000178904	DPY19L3	dpy-19-like 3 (C. elegans)	integral component of membrane|	metabolic process|	transferase activity, transferring glycosyl groups|	10	5.37	2.86	10	6.02	5.07	5.9	7.54	0.00838	1.19	11.8	0
ENSG00000042088	TDP1	tyrosyl-DNA phosphodiesterase 1	nucleus|cytoplasm|	single strand break repair|single strand break repair|DNA repair|double-strand break repair|cell death|nucleic acid phosphodiester bond hydrolysis|	double-stranded DNA binding|single-stranded DNA binding|exonuclease activity|protein binding|3'-tyrosyl-DNA phosphodiesterase activity|	10	3.05	3.68	10	-2.37	4.35	3.09	7.54	0.00838	-3.74	8.25	0
ENSG00000142694	EVA1B	eva-1 homolog B (C. elegans)	integral component of membrane|	None	None	9	3.85	4.06	9	3.79	3.83	3.84	7.54	0.00838	0.85	7.74	0
ENSG00000174456	C12ORF76	chromosome 12 open reading frame 76	None	None	None	10	4.34	4.04	10	3.32	4.04	3.82	7.53	0.00841	0.81	7.85	0
ENSG00000249242	TMEM150C	transmembrane protein 150C	integral component of membrane|	None	None	10	3.44	5.03	10	2.98	2.88	3.18	7.53	0.00841	0.66	6.6	0
ENSG00000129473	BCL2L2	BCL2-like 2	mitochondrial outer membrane|cytosol|extracellular vesicular exosome|	spermatogenesis|intrinsic apoptotic signaling pathway in response to DNA damage|negative regulation of apoptotic process|Sertoli cell proliferation|extrinsic apoptotic signaling pathway in absence of ligand|negative regulation of intrinsic apoptotic signaling pathway|	protein binding|protein homodimerization activity|protein heterodimerization activity|BH domain binding|	10	3.39	4.59	9	5.35	3.51	3.38	7.52	0.00843	0.57	9.23	0
ENSG00000273395	FLJ00388	N/A	None	None	None	9	-3.7	9.85	9	2.76	0.327	-3.53	7.5	0.0085	-9.7	-1.47	0
ENSG00000151461	UPF2	UPF2 regulator of nonsense transcripts homolog (yeast)	nucleus|cytoplasm|cytosol|exon-exon junction complex|perinuclear region of cytoplasm|	nuclear-transcribed mRNA catabolic process, nonsense-mediated decay|nuclear-transcribed mRNA catabolic process, nonsense-mediated decay|liver development|mRNA export from nucleus|gene expression|RNA metabolic process|mRNA metabolic process|organ regeneration|	RNA binding|protein binding|	8	-1.7	3.51	8	-1.74	4.33	-1.73	7.5	0.0085	-5.1	-0.26	0
ENSG00000143376	SNX27	sorting nexin family member 27	immunological synapse|nucleus|cytoplasm|early endosome|cytosol|retromer complex|early endosome membrane|WASH complex|	establishment of natural killer cell polarity|intracellular protein transport|signal transduction|endosome to lysosome transport|endosomal transport|retrograde transport, endosome to plasma membrane|	protein binding|phosphatidylinositol-3-phosphate binding|	10	0.84	0.352	10	3.43	8.96	3.02	7.5	0.0085	0.63	7.27	0
ENSG00000170606	HSPA4	heat shock 70kDa protein 4	mitochondrion|cytosol|extracellular vesicular exosome|	response to unfolded protein|protein import into mitochondrial outer membrane|chaperone-mediated protein complex assembly|	ATP binding|	10	-1.23	3.92	10	-1.27	3.91	-1.27	7.49	0.00851	-3.44	-0.14	0
ENSG00000082146	STRADB	STE20-related kinase adaptor beta	nucleus|cytoplasm|cytosol|	cell morphogenesis|protein export from nucleus|cell cycle arrest|JNK cascade|insulin receptor signaling pathway|activation of protein kinase activity|negative regulation of extrinsic apoptotic signaling pathway in absence of ligand|	protein binding|ATP binding|	10	2.55	3.36	10	2.94	4.49	2.86	7.48	0.00855	0.5	5.74	0
ENSG00000196116	TDRD7	tudor domain containing 7	cytoplasm|mitochondrial matrix|chromatoid body|ribonucleoprotein granule|P granule|	lens morphogenesis in camera-type eye|germ cell development|spermatogenesis|posttranscriptional regulation of gene expression|lens fiber cell differentiation|	mRNA binding|protein binding|protein N-terminus binding|	10	7.75	6.73	10	7.32	1.04	7.51	7.47	0.00857	3.98	16.2	0
ENSG00000090905	TNRC6A	trinucleotide repeat containing 6A	cytoplasmic mRNA processing body|cytosol|micro-ribonucleoprotein complex|	epidermal growth factor receptor signaling pathway|Notch signaling pathway|fibroblast growth factor receptor signaling pathway|cellular response to starvation|gene expression|negative regulation of translation involved in gene silencing by miRNA|Fc-epsilon receptor signaling pathway|innate immune response|neurotrophin TRK receptor signaling pathway|phosphatidylinositol-mediated signaling|	nucleotide binding|protein binding|poly(A) RNA binding|	9	6.41	2.85	9	4.2	5.3	4.53	7.46	0.00861	0.9	10.9	0
ENSG00000049130	KITLG	KIT ligand	extracellular region|extracellular space|cytoplasm|cytoskeleton|plasma membrane|plasma membrane|integral component of membrane|	neural crest cell migration|positive regulation of myeloid leukocyte differentiation|cell adhesion|signal transduction|epidermal growth factor receptor signaling pathway|cell proliferation|fibroblast growth factor receptor signaling pathway|male gonad development|negative regulation of mast cell apoptotic process|embryonic hemopoiesis|ectopic germ cell programmed cell death|Fc-epsilon receptor si…	cytokine activity|stem cell factor receptor binding|protein binding|growth factor activity|	10	-0.39	0.13	10	-3.3	9.76	-3	7.46	0.00861	-8.26	-1.08	0
ENSG00000089159	PXN	paxillin	nucleus|cytoplasm|microtubule associated complex|plasma membrane|plasma membrane|focal adhesion|cell cortex|lamellipodium|	activation of MAPK activity|cellular component movement|muscle contraction|cytoskeleton organization|cell adhesion|signal transduction|signal complex assembly|epidermal growth factor receptor signaling pathway|integrin-mediated signaling pathway|peptidyl-tyrosine phosphorylation|lamellipodium assembly|cell junction assembly|cellular response to reactive oxygen species|focal adhesion assembly|bran…	integrin binding|protein binding|beta-catenin binding|zinc ion binding|vinculin binding|protein kinase binding|BH4 domain binding|	10	3.45	3.49	10	4.13	4.42	3.88	7.45	0.00864	0.21	9.29	0
ENSG00000038945	MSR1	macrophage scavenger receptor 1	collagen trimer|cytosol|plasma membrane|integral component of plasma membrane|endocytic vesicle membrane|low-density lipoprotein particle|	receptor-mediated endocytosis|positive regulation of macrophage derived foam cell differentiation|positive regulation of cholesterol storage|cholesterol transport|plasma lipoprotein particle clearance|lipoprotein transport|	scavenger receptor activity|protein binding|low-density lipoprotein particle binding|	10	3.08	4.85	10	2.53	2.96	2.98	7.45	0.00864	0.54	6.46	0
ENSG00000250722	SEPP1	selenoprotein P, plasma, 1	extracellular region|extracellular space|extracellular vesicular exosome|	selenium compound metabolic process|response to oxidative stress|brain development|locomotory behavior|post-embryonic development|sexual reproduction|growth|	selenium binding|	10	3.4	5.2	10	2.11	2.96	2.64	7.44	0.00867	0.53	6.01	0
ENSG00000168495	POLR3D	polymerase (RNA) III (DNA directed) polypeptide D, 44kDa	nuclear chromatin|nucleoplasm|DNA-directed RNA polymerase III complex|DNA-directed RNA polymerase III complex|cytosol|	transcription from RNA polymerase III promoter|transcription elongation from RNA polymerase III promoter|termination of RNA polymerase III transcription|gene expression|positive regulation of type I interferon production|positive regulation of interferon-beta production|innate immune response|positive regulation of innate immune response|defense response to virus|	RNA polymerase III activity|DNA binding|chromatin binding|	10	6.98	2.79	10	5.82	5.2	6.37	7.44	0.00867	1.96	13.1	0
ENSG00000100796	SMEK1	SMEK homolog 1, suppressor of mek1 (Dictyostelium)	nucleus|cytoplasm|microtubule organizing center|protein phosphatase 4 complex|	protein dephosphorylation|positive regulation of gluconeogenesis|	None	10	4.71	3.55	9	2.75	4.97	3.3	7.43	0.0087	0.64	7.92	0
ENSG00000125900	SIRPD	signal-regulatory protein delta	extracellular region|	None	None	9	3.55	2.21	9	4.02	5.58	3.77	7.43	0.0087	0.71	8.81	0
ENSG00000107669	ATE1	arginyltransferase 1	nucleus|cytoplasm|	protein arginylation|	arginyltransferase activity|protein binding|	10	2.71	4.16	10	3.1	3.63	2.71	7.43	0.0087	0.58	6.33	0
ENSG00000060762	MPC1	mitochondrial pyruvate carrier 1	cellular_component|mitochondrion|mitochondrial inner membrane|integral component of membrane|	pyruvate metabolic process|mitochondrial pyruvate transport|biological_process|cellular metabolic process|small molecule metabolic process|pyruvate transmembrane transport|	molecular_function|pyruvate transmembrane transporter activity|	10	-1.14	3.45	10	-1.75	4.59	-1.46	7.42	0.00873	-4.18	-0.18	0
ENSG00000160113	NR2F6	nuclear receptor subfamily 2, group F, member 6	nucleus|nucleoplasm|	negative regulation of transcription from RNA polymerase II promoter|transcription initiation from RNA polymerase II promoter|signal transduction|gene expression|intracellular receptor signaling pathway|intracellular receptor signaling pathway|entrainment of circadian clock by photoperiod|steroid hormone mediated signaling pathway|neuron development|detection of temperature stimulus involved in s…	DNA binding|sequence-specific DNA binding transcription factor activity|steroid hormone receptor activity|ligand-activated sequence-specific DNA binding RNA polymerase II transcription factor activity|thyroid hormone receptor activity|protein binding|zinc ion binding|sequence-specific DNA binding|	10	-1.26	2.89	10	-1.68	4.98	-1.48	7.41	0.00877	-4.41	-0.16	0
ENSG00000101997	CCDC22	coiled-coil domain containing 22	cellular_component|	biological_process|	molecular_function|	10	3.08	0.243	10	5.03	7.5	4.98	7.41	0.00877	0.8	9.6	0
ENSG00000133275	CSNK1G2	casein kinase 1, gamma 2	cytoplasm|cytosol|membrane|	protein phosphorylation|sphingolipid metabolic process|signal transduction|Wnt signaling pathway|sphingolipid biosynthetic process|small molecule metabolic process|protein autophosphorylation|	magnesium ion binding|glycoprotein binding|protein serine/threonine kinase activity|protein binding|ATP binding|peptide binding|phosphoprotein binding|	10	2.95	2.42	10	5.17	5.81	4	7.4	0.00879	0.7	9.35	0
ENSG00000089902	RCOR1	REST corepressor 1	nucleus|nucleus|nucleoplasm|transcriptional repressor complex|	negative regulation of transcription from RNA polymerase II promoter|transcription, DNA-templated|blood coagulation|viral process|negative regulation of transcription, DNA-templated|histone H4 deacetylation|	RNA polymerase II core promoter proximal region sequence-specific DNA binding transcription factor activity involved in negative regulation of transcription|chromatin binding|protein binding|transcription regulatory region DNA binding|	8	3.38	5.63	6	4.87	2.54	4.29	7.4	0.00879	0.88	9.27	0
ENSG00000037637	FBXO42	F-box protein 42	None	None	None	8	4.16	2.43	9	4.42	5.32	4.38	7.38	0.00887	1.05	9.35	0
ENSG00000114805	PLCH1	phospholipase C, eta 1	cytoplasm|cytosol|plasma membrane|	lipid catabolic process|inositol phosphate metabolic process|small molecule metabolic process|phosphatidylinositol-mediated signaling|	phosphatidylinositol phospholipase C activity|signal transducer activity|calcium ion binding|calcium-dependent phospholipase C activity|	10	-4.04	8.79	10	3.15	1.11	-3.72	7.38	0.00887	-11	3.71	0
ENSG00000203896	LIME1	Lck interacting transmembrane adaptor 1	extracellular space|plasma membrane|integral component of membrane|	T cell receptor signaling pathway|B cell receptor signaling pathway|	None	10	4.65	4.63	10	2.67	3.5	3.9	7.38	0.00887	0.56	9.53	0
ENSG00000143373	ZNF687	zinc finger protein 687	nucleus|nucleolus|	transcription, DNA-templated|regulation of transcription, DNA-templated|	DNA binding|metal ion binding|	8	-3.32	9.91	9	0	0	-3.15	7.37	0.0089	-8.73	-1.32	0
ENSG00000176204	LRRTM4	leucine rich repeat transmembrane neuronal 4	cell junction|alpha-amino-3-hydroxy-5-methyl-4-isoxazolepropionic acid selective glutamate receptor complex|postsynaptic membrane|	None	None	10	2.64	0.775	10	4.82	7.88	4.48	7.36	0.00893	1.11	9.41	0
ENSG00000166192	SENP8	SUMO/sentrin specific peptidase family member 8	None	proteolysis|	cysteine-type peptidase activity|	10	3.63	5.66	10	-4.82	5.5	3.02	7.36	0.00893	-6.52	10	0
ENSG00000198846	TOX	thymocyte selection-associated high mobility group box	nucleus|	None	DNA binding|	10	-1.32	2.7	10	-3.86	6.9	-3.25	7.36	0.00893	-8.51	-0.3	0
ENSG00000174529	TMEM81	transmembrane protein 81	integral component of membrane|	None	None	10	3.85	2.41	10	8.76	7.25	7.5	7.35	0.00897	2.47	15.7	0
ENSG00000169900	PYDC1	PYD (pyrin domain) containing 1	nucleus|cytosol|IkappaB kinase complex|	negative regulation of protein kinase activity|negative regulation of NF-kappaB transcription factor activity|tumor necrosis factor-mediated signaling pathway|innate immune response|positive regulation of interleukin-1 beta secretion|	protein binding|	10	2.59	3.22	10	2.76	4.48	2.66	7.34	0.00899	0.55	6.06	0
ENSG00000189143	CLDN4	claudin 4	plasma membrane|integral component of plasma membrane|tight junction|tight junction|basal plasma membrane|apical plasma membrane|apicolateral plasma membrane|lateral plasma membrane|	signal transduction|female pregnancy|calcium-independent cell-cell adhesion|response to progesterone|establishment of skin barrier|	transmembrane signaling receptor activity|structural molecule activity|identical protein binding|	10	-3.04	8.23	10	-0.92	0.688	-2.41	7.34	0.00899	-8.13	-0.61	0
ENSG00000167394	ZNF668	zinc finger protein 668	nucleus|	transcription, DNA-templated|regulation of transcription, DNA-templated|	DNA binding|sequence-specific DNA binding transcription factor activity|metal ion binding|	10	-1.19	2.51	10	-1.8	5.43	-1.58	7.33	0.00903	-4.56	-0.14	0
ENSG00000158161	EYA3	EYA transcriptional coactivator and phosphatase 3	nucleus|transcription factor complex|cytoplasm|	double-strand break repair|transcription, DNA-templated|regulation of transcription, DNA-templated|multicellular organismal development|visual perception|anatomical structure morphogenesis|response to ionizing radiation|histone dephosphorylation|peptidyl-tyrosine dephosphorylation|peptidyl-tyrosine dephosphorylation|positive regulation of DNA repair|	chromatin binding|protein tyrosine phosphatase activity|protein binding|protein tyrosine/serine/threonine phosphatase activity|metal ion binding|	10	1.85	3.14	10	2	4.54	1.91	7.33	0.00903	0.39	4.57	0
ENSG00000197548	ATG7	autophagy related 7	pre-autophagosomal structure|cytoplasm|cytosol|axoneme|	mitochondrion degradation|liver development|cellular protein modification process|protein lipidation|C-terminal protein lipidation|cellular amino acid metabolic process|cellular response to nitrogen starvation|organelle organization|adult walking behavior|cellular response to starvation|post-embryonic development|positive regulation of autophagy|protein transport|positive regulation of macroautop…	ubiquitin activating enzyme activity|protein binding|transcription factor binding|Atg12 activating enzyme activity|Atg12 activating enzyme activity|Atg8 activating enzyme|protein homodimerization activity|	10	-0.97	2.36	10	-1.74	5.72	-1.46	7.32	0.00906	-4.28	-0.13	0
ENSG00000152348	ATG10	autophagy related 10	intracellular|cytoplasm|	protein lipidation|protein lipidation|autophagy|protein transport|positive regulation of protein modification process|protein modification by small protein conjugation|autophagy in response to ER overload|	Atg12 ligase activity|Atg12 ligase activity|	10	-1.75	2.02	10	-1.54	5.63	-1.6	7.32	0.00906	-4.78	-0.2	0
ENSG00000132388	UBE2G1	ubiquitin-conjugating enzyme E2G 1	extracellular vesicular exosome|	ubiquitin-dependent protein catabolic process|protein K63-linked ubiquitination|protein K48-linked ubiquitination|	ubiquitin-protein transferase activity|ATP binding|acid-amino acid ligase activity|ubiquitin protein ligase binding|	10	3.68	4.77	10	2.28	3.29	3.21	7.31	0.00909	0.58	6.78	0
ENSG00000140832	MARVELD3	MARVEL domain containing 3	tight junction|integral component of membrane|cytoplasmic vesicle|	cell-cell junction organization|tight junction assembly|	protein binding|	10	3.25	4.48	10	2.46	3.35	3.05	7.3	0.00912	0.62	6.14	0
ENSG00000137207	YIPF3	Yip1 domain family, member 3	Golgi apparatus|plasma membrane|integral component of membrane|transport vesicle|intracellular membrane-bounded organelle|	cell differentiation|	None	9	3.31	5.99	9	1.95	2.05	2.6	7.29	0.00915	0.48	6.23	0
ENSG00000164045	CDC25A	cell division cycle 25A	nucleoplasm|cytosol|	regulation of cyclin-dependent protein serine/threonine kinase activity|G1/S transition of mitotic cell cycle|G2/M transition of mitotic cell cycle|mitotic cell cycle|DNA replication|mitotic nuclear division|cell proliferation|response to radiation|cellular response to UV|peptidyl-tyrosine dephosphorylation|regulation of cell cycle|	protein tyrosine phosphatase activity|protein binding|protein kinase binding|	9	-1.63	4.59	10	-1.3	3.11	-1.48	7.27	0.00922	-4.26	-0.2	0
ENSG00000106261	ZKSCAN1	zinc finger with KRAB and SCAN domains 1	nucleus|	transcription, DNA-templated|regulation of transcription, DNA-templated|	DNA binding|sequence-specific DNA binding transcription factor activity|metal ion binding|	10	-1.34	3.76	10	-2.04	4.23	-1.69	7.27	0.00922	-5.39	-0.09	0
ENSG00000104921	FCER2	Fc fragment of IgE, low affinity II, receptor for (CD23)	plasma membrane|integral component of plasma membrane|external side of plasma membrane|extracellular vesicular exosome|	positive regulation of humoral immune response mediated by circulating immunoglobulin|Notch signaling pathway|positive regulation of nitric-oxide synthase activity|positive regulation of killing of cells of other organism|positive regulation of nitric-oxide synthase biosynthetic process|	integrin binding|IgE binding|carbohydrate binding|metal ion binding|	10	2.15	2.67	10	3.1	5.21	2.97	7.27	0.00922	0.46	6.28	0
ENSG00000110536	PTPMT1	protein tyrosine phosphatase, mitochondrial 1	nucleus|mitochondrion|mitochondrial inner membrane|	protein dephosphorylation|phospholipid metabolic process|phosphatidylglycerol biosynthetic process|cardiolipin biosynthetic process|peptidyl-tyrosine dephosphorylation|small molecule metabolic process|glycerophospholipid biosynthetic process|inositol phosphate dephosphorylation|	phosphatidylinositol-4,5-bisphosphate 5-phosphatase activity|protein tyrosine phosphatase activity|protein tyrosine/serine/threonine phosphatase activity|phosphatidylglycerophosphatase activity|	5	6.1	2.93	3	6.91	4.74	6.81	7.27	0.00922	3.17	14	0
ENSG00000147255	IGSF1	immunoglobulin superfamily, member 1	extracellular region|membrane|integral component of membrane|	regulation of transcription, DNA-templated|signal transduction|	receptor activity|protein binding|coreceptor activity|inhibin binding|	10	5.25	4.79	9	5.92	3	5.6	7.27	0.00922	1.2	11.3	0
ENSG00000088305	DNMT3B	DNA (cytosine-5-)-methyltransferase 3 beta	nucleus|nuclear heterochromatin|cytoplasm|intracellular membrane-bounded organelle|	negative regulation of transcription from RNA polymerase II promoter|DNA methylation|DNA methylation|methylation-dependent chromatin silencing|regulation of gene expression by genetic imprinting|response to ionizing radiation|DNA methylation on cytosine within a CG sequence|positive regulation of gene expression|protein complex localization|response to drug|positive regulation of neuron different…	transcription corepressor activity|transcription corepressor activity|DNA (cytosine-5-)-methyltransferase activity|DNA (cytosine-5-)-methyltransferase activity|DNA (cytosine-5-)-methyltransferase activity|protein binding|DNA-methyltransferase activity|unmethylated CpG binding|metal ion binding|DNA (cytosine-5-)-methyltransferase activity, acting on CpG substrates|	10	3.07	6.41	10	2.13	1.41	2.68	7.26	0.00926	0.53	5.79	0
ENSG00000129317	PUS7L	pseudouridylate synthase 7 homolog (S. cerevisiae)-like	None	pseudouridine synthesis|tRNA processing|	RNA binding|pseudouridine synthase activity|	10	0	0	10	-2.43	9.33	-2.21	7.26	0.00926	-6.47	-0.44	0
ENSG00000177732	SOX12	SRY (sex determining region Y)-box 12	cellular_component|nucleus|protein-DNA complex|	transcription, DNA-templated|regulation of transcription from RNA polymerase II promoter|spinal cord development|cell fate commitment|positive regulation of transcription from RNA polymerase II promoter|protein-DNA complex assembly|	transcription regulatory region sequence-specific DNA binding|RNA polymerase II core promoter proximal region sequence-specific DNA binding transcription factor activity involved in positive regulation of transcription|RNA polymerase II transcription coactivator activity|DNA binding|	8	6.06	5.53	8	6.85	2.07	6.15	7.25	0.0093	0.96	12.9	0
ENSG00000128284	APOL3	apolipoprotein L, 3	cellular_component|extracellular region|cytoplasm|membrane|	lipid transport|inflammatory response|signal transduction|lipoprotein metabolic process|positive regulation of I-kappaB kinase/NF-kappaB signaling|	signal transducer activity|lipid transporter activity|lipid binding|	10	7.09	3.95	10	8.06	3.64	7.17	7.24	0.00934	1.01	14.3	0
ENSG00000126803	HSPA2	heat shock 70kDa protein 2	synaptonemal complex|male germ cell nucleus|nucleus|mitochondrion|cytosol|cell surface|membrane|CatSper complex|extracellular vesicular exosome|blood microparticle|	response to unfolded protein|male meiosis|male meiosis I|spermatid development|positive regulation of cyclin-dependent protein serine/threonine kinase activity involved in G2/M transition of mitotic cell cycle|protein refolding|synaptonemal complex disassembly|negative regulation of inclusion body assembly|	protein binding|ATP binding|enzyme binding|unfolded protein binding|glycolipid binding|	10	5.71	0.47	10	-1.8	7.46	-1.57	7.24	0.00934	-5.75	5.99	0
ENSG00000170498	KISS1	KiSS-1 metastasis-suppressor	extracellular region|extracellular space|cytoplasm|apical plasma membrane|neuron projection|neuronal cell body|	cytoskeleton organization|negative regulation of cell proliferation|positive regulation of luteinizing hormone secretion|positive regulation of MAPK cascade|positive regulation of synaptic transmission|positive regulation of cytosolic calcium ion concentration involved in phospholipase C-activating G-protein coupled signaling pathway|generation of ovulation cycle rhythm|positive regulation of gro…	protein binding|kisspeptin receptor binding|	9	4.43	3.4	9	5.58	4.29	4.58	7.24	0.00934	1.18	9.86	0
ENSG00000214078	CPNE1	copine I	extracellular vesicular exosome|	lipid metabolic process|vesicle-mediated transport|	phosphatidylserine binding|transporter activity|calcium-dependent phospholipid binding|	10	3.54	5.91	10	2.37	2.07	3.22	7.23	0.00938	0.59	6.83	0
ENSG00000164308	ERAP2	endoplasmic reticulum aminopeptidase 2	endoplasmic reticulum lumen|endoplasmic reticulum membrane|integral component of membrane|	antigen processing and presentation of peptide antigen via MHC class I|proteolysis|regulation of blood pressure|antigen processing and presentation of endogenous peptide antigen via MHC class I|	aminopeptidase activity|metallopeptidase activity|zinc ion binding|	10	3.27	5.07	10	2.6	2.65	2.98	7.22	0.00943	0.47	6.2	0
ENSG00000147926	SPATA31A3	SPATA31 subfamily A, member 3	integral component of membrane|	spermatogenesis|cell differentiation|	None	7	7.28	4.23	7	8.36	3.41	8.14	7.21	0.00947	3.99	16.8	0
ENSG00000137098	SPAG8	sperm associated antigen 8	acrosomal vesicle|nucleus|membrane|	biological_process|positive regulation of protein binding|positive regulation of transcription from RNA polymerase II promoter|	molecular_function|microtubule binding|	10	5.37	6.79	10	3.2	1.46	4.48	7.2	0.00951	0.76	10.7	0
ENSG00000101945	SUV39H1	suppressor of variegation 3-9 homolog 1 (Drosophila)	chromosome, centromeric region|heterochromatin|condensed nuclear chromosome|nucleus|nuclear lamina|nucleoplasm|chromatin silencing complex|rDNA heterochromatin|	chromatin silencing at rDNA|chromatin organization|transcription, DNA-templated|rRNA processing|cell cycle|viral process|cell differentiation|histone H3-K9 dimethylation|histone H3-K9 trimethylation|negative regulation of circadian rhythm|negative regulation of transcription, DNA-templated|rhythmic process|	transcription regulatory region sequence-specific DNA binding|chromatin binding|protein binding|zinc ion binding|S-adenosylmethionine-dependent methyltransferase activity|histone-lysine N-methyltransferase activity|histone methyltransferase activity|histone methyltransferase activity (H3-K9 specific)|protein N-terminus binding|	10	2.38	3.29	10	3.37	4.49	3.15	7.2	0.00951	0.44	7.04	0
ENSG00000112855	HARS2	histidyl-tRNA synthetase 2, mitochondrial	mitochondrial matrix|	translation|tRNA aminoacylation for protein translation|histidyl-tRNA aminoacylation|gene expression|	histidine-tRNA ligase activity|ATP binding|poly(A) RNA binding|	5	3.14	4.21	2	3.66	3.39	3.45	7.19	0.00955	1.29	7.72	0
ENSG00000175711	B3GNTL1	UDP-GlcNAc:betaGal beta-1,3-N-acetylglucosaminyltransferase-like 1	None	metabolic process|	transferase activity, transferring glycosyl groups|	9	2.35	2.61	9	2.9	5.07	2.56	7.18	0.00959	0.45	6.04	0
ENSG00000124214	STAU1	staufen double-stranded RNA binding protein 1	cytoplasm|rough endoplasmic reticulum|microtubule associated complex|cytoplasmic stress granule|membrane|dendrite|cytoplasmic ribonucleoprotein granule|neuronal cell body|cell body|extracellular vesicular exosome|	intracellular mRNA localization|	double-stranded RNA binding|protein binding|protein phosphatase 1 binding|poly(A) RNA binding|	10	2.5	2.08	10	5.09	5.69	5.04	7.17	0.00962	0.61	9.61	0
ENSG00000162367	TAL1	T-cell acute lymphocytic leukemia 1	histone deacetylase complex|nuclear chromatin|nucleus|transcription factor complex|Lsd1/2 complex|	negative regulation of transcription from RNA polymerase II promoter|angiogenesis|regulation of transcription from RNA polymerase II promoter|transcription from RNA polymerase II promoter|locomotory behavior|spinal cord association neuron differentiation|hemopoiesis|erythrocyte differentiation|erythrocyte differentiation|megakaryocyte differentiation|platelet formation|basophil differentiation|po…	RNA polymerase II distal enhancer sequence-specific DNA binding|sequence-specific DNA binding RNA polymerase II transcription factor activity|RNA polymerase II transcription factor binding|chromatin binding|sequence-specific DNA binding transcription factor activity|protein binding|enzyme binding|histone deacetylase binding|transcription regulatory region DNA binding|protein heterodimerization ac…	10	2.83	5.37	10	2.07	2.36	2.52	7.17	0.00962	0.47	5.49	0
ENSG00000197694	SPTAN1	spectrin, alpha, non-erythrocytic 1	cytosol|fascia adherens|spectrin|microtubule cytoskeleton|membrane|lateral plasma membrane|Z disc|cuticular plate|intracellular membrane-bounded organelle|extracellular vesicular exosome|	apoptotic process|cellular component disassembly involved in execution phase of apoptosis|axon guidance|actin filament capping|	actin binding|structural constituent of cytoskeleton|calcium ion binding|protein binding|calmodulin binding|spectrin binding|protein heterodimerization activity|	10	2.1	2.91	10	2.15	4.58	2.1	7.17	0.00962	0.32	4.98	0
ENSG00000185404	SP140L	SP140 nuclear body protein-like	nucleus|	None	DNA binding|zinc ion binding|	10	5.87	3.58	10	5.43	3.94	5.6	7.16	0.00965	1.59	12	0
ENSG00000033100	CHPF2	chondroitin polymerizing factor 2	Golgi membrane|membrane|integral component of membrane|Golgi cisterna membrane|	carbohydrate metabolic process|glycosaminoglycan metabolic process|chondroitin sulfate metabolic process|chondroitin sulfate biosynthetic process|small molecule metabolic process|	N-acetylgalactosaminyl-proteoglycan 3-beta-glucuronosyltransferase activity|	10	3.86	3.19	10	4.04	4.33	3.92	7.15	0.00968	0.73	8.18	0
ENSG00000125787	GNRH2	gonadotropin-releasing hormone 2	extracellular region|	signal transduction|multicellular organismal development|	hormone activity|	10	3.79	2.76	10	3.7	4.72	3.77	7.15	0.00968	0.59	8.45	0
ENSG00000101365	IDH3B	isocitrate dehydrogenase 3 (NAD+) beta	nucleus|mitochondrion|mitochondrial matrix|	tricarboxylic acid cycle|isocitrate metabolic process|2-oxoglutarate metabolic process|NADH metabolic process|cellular metabolic process|small molecule metabolic process|	magnesium ion binding|isocitrate dehydrogenase (NAD+) activity|electron carrier activity|NAD binding|	10	3.33	3.12	10	4.15	4.44	4.19	7.15	0.00968	0.46	8.68	0
ENSG00000102021	LUZP4	leucine zipper protein 4	nucleus|	None	None	10	6.11	3.61	9	5.43	3.93	5.63	7.15	0.00968	1.48	12.6	0
ENSG00000211658	IGLV3-27	immunoglobulin lambda variable 3-27	None	None	None	7	5.22	1.38	7	6.66	6.3	6.32	7.14	0.00972	1.73	14	0
ENSG00000119541	VPS4B	vacuolar protein sorting 4 homolog B (S. cerevisiae)	nucleus|cytoplasm|lysosome|endosome|early endosome|late endosome|vacuolar membrane|cytosol|cytosol|endosome membrane|late endosome membrane|extracellular vesicular exosome|	ATP catabolic process|potassium ion transport|endosome organization|cell cycle|protein transport|viral process|endosomal transport|endosomal transport|endosomal transport|viral life cycle|intracellular cholesterol transport|endosome to lysosome transport via multivesicular body sorting pathway|response to lipid|regulation of viral process|cell division|membrane organization|positive regulation of…	protein binding|ATP binding|protein C-terminus binding|ATPase activity|ATPase activity|ATPase activity, coupled|	10	-1.63	4.1	10	-4.25	5.43	-3.49	7.14	0.00972	-9.11	-0.42	0
ENSG00000090339	ICAM1	intercellular adhesion molecule 1	immunological synapse|extracellular space|plasma membrane|integral component of plasma membrane|external side of plasma membrane|membrane|extracellular vesicular exosome|	ovarian follicle development|regulation of leukocyte mediated cytotoxicity|response to amphetamine|T cell activation via T cell receptor contact with antigen bound to MHC molecule on antigen presenting cell|T cell antigen processing and presentation|positive regulation of cellular extravasation|cell adhesion|heterophilic cell-cell adhesion|leukocyte cell-cell adhesion|cell aging|regulation of cel…	virus receptor activity|receptor activity|transmembrane signaling receptor activity|integrin binding|integrin binding|protein binding|	10	-1.23	2.33	10	-1.92	5.43	-1.69	7.14	0.00972	-5.23	-0.1	0
ENSG00000256646	PSMA2	proteasome (prosome, macropain) subunit, alpha type, 2	proteasome complex|cytoplasmic mRNA processing body|nucleus|nucleoplasm|cytosol|proteasome core complex|proteasome core complex, alpha-subunit complex|extracellular vesicular exosome|	G1/S transition of mitotic cell cycle|protein polyubiquitination|mitotic cell cycle|antigen processing and presentation of peptide antigen via MHC class I|antigen processing and presentation of exogenous peptide antigen via MHC class I, TAP-dependent|regulation of cellular amino acid metabolic process|apoptotic process|DNA damage response, signal transduction by p53 class mediator resulting in ce…	threonine-type endopeptidase activity|protein binding|	3	4.06	3.59	5	4.87	4.17	4.5	7.13	0.00976	1.05	10.7	0
ENSG00000108551	RASD1	RAS, dexamethasone-induced 1	nucleus|plasma membrane|perinuclear region of cytoplasm|	GTP catabolic process|signal transduction|G-protein coupled receptor signaling pathway|nitric oxide mediated signal transduction|small GTPase mediated signal transduction|negative regulation of transcription, DNA-templated|	GTPase activity|GTP binding|	10	4.51	7.6	10	-1	1.58	4.46	7.12	0.00979	0.03	11	0
ENSG00000077809	GTF2I	general transcription factor IIi	nucleus|cytoplasm|membrane|cell projection|neuronal cell body|	regulation of transcription, DNA-templated|transcription from RNA polymerase II promoter|transcription initiation from RNA polymerase II promoter|signal transduction|embryo development|negative regulation of angiogenesis|negative regulation of cytosolic calcium ion concentration|	DNA binding|sequence-specific DNA binding transcription factor activity|protein binding|mitogen-activated protein kinase binding|	10	-0.83	0.961	10	-1.6	6.57	-1.44	7.12	0.00979	-4.07	-0.18	0
ENSG00000164002	EXO5	exonuclease 5	nucleus|cytosol|	DNA catabolic process, exonucleolytic|DNA catabolic process, exonucleolytic|interstrand cross-link repair|	DNA binding|single-stranded DNA 3'-5' exodeoxyribonuclease activity|protein homodimerization activity|single-stranded DNA 5'-3' exodeoxyribonuclease activity|metal ion binding|4 iron, 4 sulfur cluster binding|	9	3.82	6.89	10	2.29	1.04	3.49	7.11	0.00982	-5.7	9.44	0
ENSG00000196876	SCN8A	sodium channel, voltage gated, type VIII, alpha subunit	voltage-gated sodium channel complex|plasma membrane|integral component of membrane|cytoplasmic membrane-bounded vesicle|Z disc|dendrite|node of Ranvier|neuronal cell body|axon initial segment|	sodium ion transport|nervous system development|axon guidance|peripheral nervous system development|muscle organ development|sensory perception of sound|adult walking behavior|response to toxic substance|neuronal action potential|regulation of ion transmembrane transport|sodium ion transmembrane transport|sodium ion transmembrane transport|sodium ion transmembrane transport|myelination|neuromuscu…	voltage-gated sodium channel activity|voltage-gated sodium channel activity|ATP binding|	10	7.47	1.75	10	7.22	5.67	7.36	7.11	0.00982	3.79	16.4	0
ENSG00000171533	MAP6	microtubule-associated protein 6	Golgi apparatus|microtubule|perinuclear region of cytoplasm|	microtubule cytoskeleton organization|transport|lysosome localization|dendrite morphogenesis|	protein binding|calmodulin binding|microtubule binding|	10	2.74	5.83	10	3.75	1.82	2.75	7.1	0.00986	0.57	6.65	0
ENSG00000145864	GABRB2	gamma-aminobutyric acid (GABA) A receptor, beta 2	cytosol|plasma membrane|integral component of plasma membrane|cell junction|chloride channel complex|postsynaptic membrane|extracellular vesicular exosome|GABA-A receptor complex|	transport|gamma-aminobutyric acid signaling pathway|synaptic transmission|sensory perception of sound|ion transmembrane transport|negative regulation of neuron apoptotic process|synaptic transmission, GABAergic|transmembrane transport|inner ear receptor cell development|innervation|cellular response to histamine|cochlea development|chloride transmembrane transport|chloride transmembrane transport|	GABA-A receptor activity|inhibitory extracellular ligand-gated ion channel activity|chloride channel activity|	10	5.42	4.52	10	4.35	3.09	4.59	7.09	0.00991	0.83	9.77	0
ENSG00000136448	NMT1	N-myristoyltransferase 1	cytoplasm|cytosol|plasma membrane|actin cytoskeleton|cell junction|	in utero embryonic development|N-terminal protein myristoylation|apoptotic process|phototransduction, visible light|protein lipoylation|viral process|rhodopsin mediated signaling pathway|regulation of rhodopsin mediated signaling pathway|intrinsic apoptotic signaling pathway|positive regulation of protein insertion into mitochondrial membrane involved in apoptotic signaling pathway|	catalytic activity|glycylpeptide N-tetradecanoyltransferase activity|	8	3.56	3.25	9	3.4	4.18	3.45	7.09	0.00991	0.58	7.31	0
ENSG00000120457	KCNJ5	potassium inwardly-rectifying channel, subfamily J, member 5	plasma membrane|voltage-gated potassium channel complex|	potassium ion transport|synaptic transmission|regulation of ion transmembrane transport|potassium ion transmembrane transport|potassium ion transmembrane transport|potassium ion transmembrane transport|	inward rectifier potassium channel activity|protein binding|G-protein activated inward rectifier potassium channel activity|	10	6.13	2.43	10	4.58	5.12	4.58	7.08	0.00995	0.88	10.6	0
ENSG00000203818	HIST2H3PS2	histone cluster 2, H3, pseudogene 2	None	None	None	5	5.93	5.75	6	3.79	2.4	5.02	7.08	0.00995	1.86	11.7	0
ENSG00000104894	CD37	CD37 molecule	immunological synapse|membrane|integral component of membrane|extracellular vesicular exosome|	positive regulation of immunoglobulin production|regulation of humoral immune response|negative regulation of cell proliferation|negative regulation of myeloid dendritic cell activation|defense response to protozoan|regulation of defense response to virus|	protein binding|	10	2.95	5.02	10	5.71	3.24	3.52	7.08	0.00995	0.75	9.74	0
ENSG00000123219	CENPK	centromere protein K	condensed chromosome kinetochore|nucleoplasm|cytosol|	mitotic cell cycle|nucleosome assembly|centromere-specific nucleosome assembly|positive regulation of transcription from RNA polymerase II promoter|	None	5	3.13	2.98	5	5.36	5.07	4.87	7.07	0.00999	0.81	11	0
ENSG00000120963	ZNF706	zinc finger protein 706	None	None	metal ion binding|	10	2.38	0.381	10	5.32	6.92	5.29	7.07	0.00999	0.95	11.1	0
ENSG00000088367	EPB41L1	erythrocyte membrane protein band 4.1-like 1	cytosol|cytoskeleton|plasma membrane|extrinsic component of membrane|	synaptic transmission|cortical actin cytoskeleton organization|	actin binding|structural molecule activity|	10	3.21	5.4	10	1.86	2.55	2.3	7.07	0.00999	0.33	5.62	0
ENSG00000182070	OR52A1	olfactory receptor, family 52, subfamily A, member 1	plasma membrane|integral component of plasma membrane|	signal transduction|G-protein coupled receptor signaling pathway|sensory perception of smell|detection of chemical stimulus involved in sensory perception of smell|	transmembrane signaling receptor activity|G-protein coupled receptor activity|olfactory receptor activity|	10	10.5	5.34	10	6.39	3	9.38	7.06	0.01	3.81	20.1	0
ENSG00000186908	ZDHHC17	zinc finger, DHHC-type containing 17	Golgi membrane|cytoplasm|Golgi apparatus|integral component of membrane|Golgi-associated vesicle membrane|intracellular membrane-bounded organelle|	signal transduction|magnesium ion transport|protein palmitoylation|lipoprotein transport|positive regulation of I-kappaB kinase/NF-kappaB signaling|	signal transducer activity|protein binding|zinc ion binding|magnesium ion transmembrane transporter activity|palmitoyltransferase activity|protein-cysteine S-palmitoyltransferase activity|identical protein binding|	10	2.09	2.9	10	2.62	4.54	2.54	7.06	0.01	0.36	5.57	0
ENSG00000172995	ARPP21	cAMP-regulated phosphoprotein, 21kDa	cellular_component|cytoplasm|	biological_process|cellular response to heat|	molecular_function|nucleic acid binding|calmodulin binding|	10	3.85	2.69	10	5.46	4.87	4.57	7.04	0.0101	0.81	9.8	0
ENSG00000112335	SNX3	sorting nexin 3	cytoplasm|early endosome|cytosol|endosome membrane|intracellular membrane-bounded organelle|extracellular vesicular exosome|	intracellular protein transport|endocytosis|hemoglobin biosynthetic process|	protein binding|protein phosphatase binding|phosphatidylinositol-3-phosphate binding|	9	2.66	2.39	9	2.53	4.97	2.54	7.04	0.0101	0.43	5.71	0
ENSG00000154122	ANKH	ANKH inorganic pyrophosphate transport regulator	plasma membrane|integral component of plasma membrane|integral component of membrane|outer membrane|	skeletal system development|locomotory behavior|regulation of bone mineralization|regulation of bone mineralization|inorganic diphosphate transport|inorganic diphosphate transport|phosphate ion transmembrane transport|	inorganic phosphate transmembrane transporter activity|phosphate ion transmembrane transporter activity|inorganic diphosphate transmembrane transporter activity|	10	-0.91	1.58	10	-2.11	6.54	-1.76	7.04	0.0101	-5.77	-0.11	0
ENSG00000135870	RC3H1	ring finger and CCCH-type domains 1	cytoplasmic mRNA processing body|cytoplasmic stress granule|	nuclear-transcribed mRNA catabolic process|regulation of germinal center formation|negative regulation of germinal center formation|posttranscriptional regulation of gene expression|protein ubiquitination|negative regulation of B cell proliferation|cytoplasmic mRNA processing body assembly|regulation of mRNA stability|negative regulation of T-helper cell differentiation|negative regulation of act…	mRNA 3'-UTR binding|ubiquitin-protein transferase activity|zinc ion binding|poly(A) RNA binding|	8	2.47	1.75	9	3.88	5.98	3.1	7.04	0.0101	0.56	6.96	0
ENSG00000071243	ING3	inhibitor of growth family, member 3	Swr1 complex|nucleus|nucleoplasm|nucleolus|cytoplasm|Piccolo NuA4 histone acetyltransferase complex|NuA4 histone acetyltransferase complex|	chromatin organization|transcription, DNA-templated|regulation of transcription, DNA-templated|regulation of growth|positive regulation of apoptotic process|histone H4 acetylation|histone H2A acetylation|	histone acetyltransferase activity|zinc ion binding|methylated histone binding|	10	1.71	1.12	10	2.38	6.38	2.15	7.02	0.0102	0.28	6.47	0
ENSG00000100150	DEPDC5	DEP domain containing 5	lysosomal membrane|cytosol|perinuclear region of cytoplasm|	intracellular signal transduction|positive regulation of GTPase activity|	GTPase activator activity|	10	1.53	0.838	10	4.94	7.62	3.83	7.02	0.0102	0.67	9.34	0
ENSG00000138463	DIRC2	disrupted in renal carcinoma 2	lysosomal membrane|integral component of membrane|	transport|	None	10	7.14	5.45	10	2.47	3.36	2.58	7.01	0.0102	0.51	10.9	0
ENSG00000255223	OR5M11	olfactory receptor, family 5, subfamily M, member 11	plasma membrane|integral component of membrane|	G-protein coupled receptor signaling pathway|detection of chemical stimulus involved in sensory perception of smell|	G-protein coupled receptor activity|olfactory receptor activity|	10	3.31	3.04	10	2.81	4.3	2.82	7	0.0103	0.43	6.84	0
ENSG00000143368	SF3B4	splicing factor 3b, subunit 4, 49kDa	nucleoplasm|spliceosomal complex|U12-type spliceosomal complex|	RNA splicing, via transesterification reactions|mRNA splicing, via spliceosome|mRNA splicing, via spliceosome|mRNA processing|RNA splicing|gene expression|	nucleotide binding|protein binding|poly(A) RNA binding|	3	0.62	0.154	3	-4.8	8.51	-4.62	6.99	0.0103	-11	-2.6	0
ENSG00000183878	UTY	ubiquitously transcribed tetratricopeptide repeat containing, Y-linked	nucleus|	in utero embryonic development|heart development|regulation of chromatin silencing|establishment of protein localization|oxidation-reduction process|canonical Wnt signaling pathway|histone H3-K36 demethylation|cardiac muscle cell contraction|	RNA polymerase II core promoter proximal region sequence-specific DNA binding|metal ion binding|histone demethylase activity (H3-K36 specific)|	10	8.65	4.62	10	8.25	2.73	8.45	6.99	0.0103	3.81	18	0
ENSG00000268028	AC025262.1	N/A	None	None	None	5	2.41	3.39	5	3.61	4.34	3.03	6.99	0.0103	0.78	7.06	0
ENSG00000141858	SAMD1	sterile alpha motif domain containing 1	extracellular region|cytoplasm|	None	None	10	2.85	5.06	10	1.74	2.69	2.5	6.99	0.0103	0.44	5.38	0
ENSG00000205084	TMEM231	transmembrane protein 231	integral component of membrane|ciliary transition zone|TCTN-B9D complex|ciliary membrane|	smoothened signaling pathway|cilium assembly|	None	9	5.63	2.14	9	5.97	5.17	5.83	6.99	0.0103	2.13	12.1	0
ENSG00000133943	C14ORF159	chromosome 14 open reading frame 159	cellular_component|mitochondrion|	biological_process|	molecular_function|	10	3.12	6.53	10	1.54	0.921	3.11	6.98	0.0103	0.55	6.92	0
ENSG00000102078	SLC25A14	solute carrier family 25 (mitochondrial carrier, brain), member 14	mitochondrion|mitochondrial inner membrane|integral component of plasma membrane|	transport|mitochondrial transport|aerobic respiration|	None	10	-1.27	2.08	10	-2.15	5.71	-1.69	6.98	0.0103	-5.92	-0.08	0
ENSG00000135040	NAA35	N(alpha)-acetyltransferase 35, NatC auxiliary subunit	cytoplasm|cytoplasm|polysome|NatC complex|	negative regulation of apoptotic process|smooth muscle cell proliferation|	protein binding|	9	2.76	3.86	9	1.87	3.71	2.16	6.98	0.0103	0.36	5.68	0
ENSG00000130725	UBE2M	ubiquitin-conjugating enzyme E2M	cytosol|extracellular vesicular exosome|	cellular protein modification process|cellular protein modification process|transforming growth factor beta receptor signaling pathway|protein ubiquitination|protein ubiquitination|positive regulation of neuron apoptotic process|protein neddylation|protein neddylation|	ubiquitin-protein transferase activity|ubiquitin-protein transferase activity|protein binding|ATP binding|ribosomal S6-glutamic acid ligase activity|NEDD8 ligase activity|	8	5.55	3.92	8	4.95	3.45	5.14	6.97	0.0104	1.25	11.9	0
ENSG00000174599	TRAM1L1	translocation associated membrane protein 1-like 1	endoplasmic reticulum membrane|integral component of membrane|	protein transport|	None	9	3.27	3.79	9	2.56	3.52	2.85	6.96	0.0104	0.57	8.15	0
ENSG00000135482	ZC3H10	zinc finger CCCH-type containing 10	None	None	protein binding|poly(A) RNA binding|metal ion binding|	8	3.19	6.06	8	1.69	1.96	2.53	6.96	0.0104	0.41	6.11	0
ENSG00000197323	TRIM33	tripartite motif containing 33	nucleus|nucleoplasm|intracellular membrane-bounded organelle|	negative regulation of transcription from RNA polymerase II promoter|transcription, DNA-templated|transcription initiation from RNA polymerase II promoter|transforming growth factor beta receptor signaling pathway|gene expression|protein ubiquitination|protein ubiquitination|regulation of transforming growth factor beta receptor signaling pathway|negative regulation of BMP signaling pathway|negat…	DNA binding|ubiquitin-protein transferase activity|protein binding|zinc ion binding|ligase activity|co-SMAD binding|R-SMAD binding|	10	2.79	4.28	10	3.65	3.17	3.01	6.96	0.0104	0.57	6.97	0
ENSG00000124782	RREB1	ras responsive element binding protein 1	nucleus|nucleus|nucleolus|cytoplasm|cytoplasm|nuclear body|nuclear speck|extracellular vesicular exosome|	regulation of transcription, DNA-templated|transcription from RNA polymerase II promoter|Ras protein signal transduction|multicellular organismal development|negative regulation of transcription, DNA-templated|positive regulation of transcription, DNA-templated|	DNA binding|sequence-specific DNA binding transcription factor activity|metal ion binding|	9	-1.24	3.21	10	-1.86	4.39	-1.49	6.96	0.0104	-4.91	-0.1	0
ENSG00000184012	TMPRSS2	transmembrane protease, serine 2	plasma membrane|integral component of plasma membrane|extracellular vesicular exosome|	proteolysis|receptor-mediated endocytosis|protein autoprocessing|positive regulation of viral entry into host cell|	serine-type endopeptidase activity|scavenger receptor activity|protein binding|serine-type peptidase activity|	10	8.18	4.43	10	5.61	3.51	7.22	6.96	0.0104	0.97	14.8	0
ENSG00000126353	CCR7	chemokine (C-C motif) receptor 7	intracellular|plasma membrane|plasma membrane|external side of plasma membrane|integral component of membrane|	establishment of T cell polarity|positive regulation of cell-matrix adhesion|dendritic cell chemotaxis|myeloid dendritic cell chemotaxis|myeloid dendritic cell chemotaxis|positive regulation of dendritic cell antigen processing and presentation|positive regulation of hypersensitivity|positive regulation of humoral immune response|inflammatory response|immune response|G-protein coupled receptor si…	G-protein coupled receptor activity|C-C chemokine receptor activity|chemokine (C-C motif) ligand 19 binding|chemokine (C-C motif) ligand 21 binding|C-C motif chemokine 19 receptor activity|C-C motif chemokine 21 receptor activity|	9	3.32	4.66	10	3.98	2.75	3.39	6.96	0.0104	0.53	7.59	0
ENSG00000169764	UGP2	UDP-glucose pyrophosphorylase 2	nucleus|cytosol|extracellular vesicular exosome|	carbohydrate metabolic process|glycogen biosynthetic process|glucose metabolic process|UDP-glucose metabolic process|UDP-glucuronate biosynthetic process|xenobiotic metabolic process|glucose 1-phosphate metabolic process|small molecule metabolic process|cellular glucuronidation|	UTP:glucose-1-phosphate uridylyltransferase activity|UTP:glucose-1-phosphate uridylyltransferase activity|protein binding|glucose binding|pyrimidine ribonucleotide binding|metal ion binding|	10	2.46	3.92	10	2.32	3.35	2.35	6.94	0.0105	0.35	5.55	0
ENSG00000067113	PPAP2A	phosphatidic acid phosphatase type 2A	plasma membrane|integral component of plasma membrane|membrane|extracellular vesicular exosome|	protein dephosphorylation|lipid metabolic process|sphingolipid metabolic process|protein kinase C-activating G-protein coupled receptor signaling pathway|negative regulation of cell proliferation|germ cell migration|regulation of lipid metabolic process|sphingolipid biosynthetic process|intracellular steroid hormone receptor signaling pathway|androgen receptor signaling pathway|small molecule met…	phosphatidate phosphatase activity|phosphatidate phosphatase activity|	10	0.48	0.0479	10	-3.32	9.58	-3.19	6.94	0.0105	-9.53	-0.92	0
ENSG00000106113	CRHR2	corticotropin releasing hormone receptor 2	endoplasmic reticulum|Golgi apparatus|plasma membrane|integral component of plasma membrane|cell surface|	adenylate cyclase-modulating G-protein coupled receptor signaling pathway|negative regulation of angiogenesis|positive regulation of cAMP-mediated signaling|negative regulation of cAMP-mediated signaling|cellular response to corticotropin-releasing hormone stimulus|	hormone activity|protein binding|corticotrophin-releasing factor receptor activity|	9	6.52	4.95	9	3.21	2.95	3.58	6.93	0.0106	0.51	10.5	0
ENSG00000118961	C2ORF43	chromosome 2 open reading frame 43	None	None	None	10	-1.65	2.48	10	-1.64	4.77	-1.65	6.93	0.0106	-5.56	0.73	0
ENSG00000230989	HSBP1	heat shock factor binding protein 1	nucleus|cytoskeleton|	negative regulation of transcription from RNA polymerase II promoter|muscle contraction|	transcription corepressor activity|	10	5.67	3	9	5.46	4.27	5.57	6.93	0.0106	2.13	11	0
ENSG00000212710	CTAGE1	cutaneous T-cell lymphoma-associated antigen 1	cellular_component|integral component of membrane|	biological_process|	None	9	5.31	5.63	9	7.35	1.81	6.12	6.91	0.0107	1.68	13.2	0
ENSG00000128482	RNF112	ring finger protein 112	nucleus|cytoplasm|integral component of membrane|	GTP catabolic process|	GTPase activity|GTP binding|zinc ion binding|	10	-0.81	1.26	10	-1.93	6.69	-1.65	6.91	0.0107	-5.48	-0.06	0
ENSG00000170180	GYPA	glycophorin A (MNS blood group)	plasma membrane|integral component of plasma membrane|external side of plasma membrane|membrane|extracellular vesicular exosome|	cytoskeletal anchoring at plasma membrane|response to virus|viral process|regulation of response to osmotic stress|	virus receptor activity|identical protein binding|protein homodimerization activity|	10	0.47	0.171	9	3.35	7.18	3.48	6.9	0.0107	0.6	8.9	0
ENSG00000197147	LRRC8B	leucine rich repeat containing 8 family, member B	plasma membrane|integral component of membrane|	ion transport|	protein binding|	10	-1.29	3.4	10	-1.31	3.83	-1.32	6.9	0.0107	-3.88	-0.12	0
ENSG00000108292	MLLT6	myeloid/lymphoid or mixed-lineage leukemia (trithorax homolog, Drosophila); translocated to, 6	nucleus|	regulation of transcription, DNA-templated|	protein binding|zinc ion binding|	10	-1.56	6.66	10	-0.77	1.03	-1.27	6.89	0.0108	-3.88	-0.12	0
ENSG00000162065	TBC1D24	TBC1 domain family, member 24	cytoplasm|	neuron projection development|positive regulation of Rab GTPase activity|	Rab GTPase activator activity|protein binding|	10	-1.02	2.66	10	-2.6	5.55	-1.68	6.89	0.0108	-5.74	-0.16	0
ENSG00000121073	SLC35B1	solute carrier family 35, member B1	endoplasmic reticulum membrane|integral component of membrane|intracellular membrane-bounded organelle|	transport|UDP-galactose transmembrane transport|	UDP-galactose transmembrane transporter activity|	6	5	4.29	6	4.04	3.04	4.25	6.89	0.0108	0.97	10	0
ENSG00000143321	HDGF	hepatoma-derived growth factor	extracellular space|nucleus|nucleoplasm|cytoplasm|transcriptional repressor complex|	negative regulation of transcription from RNA polymerase II promoter|transcription, DNA-templated|activation of signaling protein activity involved in unfolded protein response|signal transduction|cell proliferation|endoplasmic reticulum unfolded protein response|cellular protein metabolic process|	nucleotide binding|RNA polymerase II transcription corepressor activity|transcription corepressor binding|DNA binding|growth factor activity|heparin binding|poly(A) RNA binding|	10	5.77	4.76	9	5.07	2.54	5.26	6.89	0.0108	0.78	10.7	0
ENSG00000183971	NPW	neuropeptide W	extracellular region|	G-protein coupled receptor signaling pathway|neuropeptide signaling pathway|feeding behavior|	G-protein coupled receptor binding|protein binding|	10	2.53	2.89	10	3.08	4.42	2.84	6.88	0.0108	0.4	6.2	0
ENSG00000178694	NSUN3	NOP2/Sun domain family, member 3	None	methylation|	RNA binding|methyltransferase activity|	9	-3.18	8.93	8	6.71	1.7	-2.96	6.88	0.0108	-9	2.41	0
ENSG00000141295	SCRN2	secernin 2	extracellular vesicular exosome|	proteolysis|biological_process|	molecular_function|dipeptidase activity|	10	3.3	5.17	10	-1.93	3.19	3.61	6.88	0.0108	-1.48	8.9	0
ENSG00000172296	SPTLC3	serine palmitoyltransferase, long chain base subunit 3	endoplasmic reticulum membrane|integral component of membrane|serine C-palmitoyltransferase complex|	sphingolipid metabolic process|sphingolipid biosynthetic process|small molecule metabolic process|sphingoid biosynthetic process|	serine C-palmitoyltransferase activity|pyridoxal phosphate binding|	10	2.45	2.7	9	3.03	4.61	2.57	6.87	0.0108	0.44	5.71	0
ENSG00000150556	LYPD6B	LY6/PLAUR domain containing 6B	plasma membrane|anchored component of membrane|	None	None	10	-2.91	9.15	10	1.88	0.424	-2.64	6.87	0.0108	-8.33	-0.53	0
ENSG00000237102	AC040160.1	N/A	None	None	None	9	3.13	3.34	9	2.89	3.88	3.11	6.87	0.0108	0.35	7.89	0
ENSG00000134901	KDELC1	KDEL (Lys-Asp-Glu-Leu) containing 1	endoplasmic reticulum lumen|	None	None	10	4.63	3.51	10	3.81	3.76	4.4	6.86	0.0109	0.95	9.35	0
ENSG00000100647	KIAA0247	KIAA0247	cellular_component|integral component of membrane|	biological_process|	molecular_function|	10	7.83	3.14	10	9.1	4.17	8.68	6.85	0.0109	4.59	18	0
ENSG00000128928	IVD	isovaleryl-CoA dehydrogenase	mitochondrial matrix|mitochondrial matrix|	leucine catabolic process|leucine catabolic process|branched-chain amino acid catabolic process|cellular nitrogen compound metabolic process|small molecule metabolic process|oxidation-reduction process|	isovaleryl-CoA dehydrogenase activity|isovaleryl-CoA dehydrogenase activity|flavin adenine dinucleotide binding|	10	-1.62	4.4	10	-1.79	2.8	-1.69	6.85	0.0109	-5.69	3.7	0
ENSG00000129255	MPDU1	mannose-P-dolichol utilization defect 1	mitochondrion|endoplasmic reticulum|endoplasmic reticulum membrane|membrane|integral component of membrane|extracellular vesicular exosome|	protein folding|dolichol-linked oligosaccharide biosynthetic process|transport|oligosaccharide biosynthetic process|oligosaccharide biosynthetic process|	None	10	-0.71	0.925	10	-1.74	6.87	-1.32	6.83	0.011	-4.46	-0.06	0
ENSG00000157212	PAXIP1	PAX interacting (with transcription-activation domain) protein 1	nucleus|nuclear matrix|histone methyltransferase complex|	positive regulation of histone H3-K36 methylation|vasculogenesis|DNA repair|DNA recombination|transcription, DNA-templated|response to ionizing radiation|DNA damage response, signal transduction by p53 class mediator|positive regulation of protein ubiquitination|positive regulation of histone acetylation|endothelial cell migration|positive regulation of isotype switching|histone H3-K4 methylation…	protein binding|	9	4.37	3.84	9	3.14	3.64	3.64	6.82	0.011	0.49	9.56	0
ENSG00000163281	GNPDA2	glucosamine-6-phosphate deaminase 2	nucleus|cytoplasm|	carbohydrate metabolic process|N-acetylglucosamine metabolic process|	glucosamine-6-phosphate deaminase activity|hydrolase activity|	10	3.08	3.18	10	2.71	4.01	2.8	6.82	0.011	0.14	7.35	0
ENSG00000118946	PCDH17	protocadherin 17	plasma membrane|integral component of membrane|	homophilic cell adhesion|	calcium ion binding|protein binding|	10	-1.58	5.76	9	-1.02	1.5	-1.43	6.82	0.011	-4.11	-0.11	0
ENSG00000168612	ZSWIM1	zinc finger, SWIM-type containing 1	nucleus|	None	zinc ion binding|	10	5.64	6.66	10	4.67	0.516	5.54	6.82	0.011	0.78	12.3	0
ENSG00000100883	SRP54	signal recognition particle 54kDa	nucleus|nucleolus|cytoplasm|signal recognition particle, endoplasmic reticulum targeting|cytosol|nuclear speck|	GTP catabolic process|GTP catabolic process|translation|SRP-dependent cotranslational protein targeting to membrane|SRP-dependent cotranslational protein targeting to membrane|SRP-dependent cotranslational protein targeting to membrane, translocation|SRP-dependent cotranslational protein targeting to membrane, signal sequence recognition|gene expression|response to drug|cellular protein metabolic…	GTPase activity|GTP binding|drug binding|7S RNA binding|GDP binding|endoplasmic reticulum signal peptide binding|ribonucleoprotein complex binding|poly(A) RNA binding|	7	3.55	3.35	6	4.49	3.92	3.63	6.81	0.0111	0.73	8.5	0
ENSG00000164808	SPIDR	scaffolding protein involved in DNA repair	nuclear chromosome|	double-strand break repair via homologous recombination|cellular response to DNA damage stimulus|regulation of double-strand break repair via homologous recombination|positive regulation of protein complex assembly|regulation of establishment of protein localization to chromosome|cellular response to ionizing radiation|cellular response to hydroxyurea|cellular response to camptothecin|positive re…	protein binding|	10	-1.26	2.81	10	-1.46	4.35	-1.37	6.81	0.0111	-4.57	-0.01	0
ENSG00000134186	PRPF38B	pre-mRNA processing factor 38B	spliceosomal complex|	mRNA processing|RNA splicing|	poly(A) RNA binding|	3	4.63	5.03	3	4.78	2.09	4.64	6.81	0.0111	1.94	10	0
ENSG00000211951	IGHV2-26	immunoglobulin heavy variable 2-26	None	None	None	10	1.73	1.52	10	3.26	5.95	2.78	6.81	0.0111	0.45	6.57	0
ENSG00000079931	MOXD1	monooxygenase, DBH-like 1	endoplasmic reticulum membrane|integral component of membrane|	oxidation-reduction process|	copper ion binding|oxidoreductase activity, acting on paired donors, with incorporation or reduction of molecular oxygen, reduced ascorbate as one donor, and incorporation of one atom of oxygen|	9	2.16	1.98	8	4.53	5.51	2.76	6.8	0.0111	0.34	8.38	0
ENSG00000157181	C1ORF27	chromosome 1 open reading frame 27	integral component of membrane|	oxidation-reduction process|	zinc ion binding|oxidoreductase activity|	6	5.96	1.52	7	5.79	5.58	5.86	6.8	0.0111	2.31	12.4	0
ENSG00000149948	HMGA2	high mobility group AT-hook 2	nuclear chromosome|nucleus|nucleoplasm|protein-DNA complex|senescence-associated heterochromatin focus|SMAD protein complex|	negative regulation of transcription from RNA polymerase II promoter|DNA catabolic process, endonucleolytic|epithelial to mesenchymal transition|chondrocyte differentiation|mesodermal-endodermal cell signaling|base-excision repair|chromatin organization|transcription, DNA-templated|regulation of transcription, DNA-templated|mitotic nuclear division|mitotic G2 DNA damage checkpoint|signal transduc…	regulatory region DNA binding|protein binding transcription factor activity|core promoter binding|RNA polymerase II core promoter proximal region sequence-specific DNA binding transcription factor activity involved in positive regulation of transcription|RNA polymerase II core promoter proximal region sequence-specific DNA binding transcription factor activity involved in negative regulation of t…	10	3.92	6.06	10	1.97	2.22	2.85	6.78	0.0112	0.44	7.26	0
ENSG00000064313	TAF2	TAF2 RNA polymerase II, TATA box binding protein (TBP)-associated factor, 150kDa	transcription factor TFIID complex|transcription factor TFIID complex|transcription factor TFTC complex|	G2/M transition of mitotic cell cycle|transcription initiation from RNA polymerase II promoter|proteolysis|response to organic cyclic compound|positive regulation of transcription from RNA polymerase II promoter|	protein binding|metallopeptidase activity|zinc ion binding|transcription regulatory region DNA binding|	5	2.37	2.6	5	2.84	4.55	2.5	6.77	0.0112	0.63	6.29	0
ENSG00000182372	CLN8	ceroid-lipofuscinosis, neuronal 8 (epilepsy, progressive with mental retardation)	mitochondrion|endoplasmic reticulum|endoplasmic reticulum membrane|endoplasmic reticulum-Golgi intermediate compartment|integral component of membrane|endoplasmic reticulum-Golgi intermediate compartment membrane|	age-dependent response to oxidative stress|phospholipid metabolic process|ceramide metabolic process|lipid transport|mitochondrial membrane organization|lysosome organization|nervous system development|visual perception|adult walking behavior|cholesterol metabolic process|cell death|associative learning|regulation of cell size|lipid biosynthetic process|somatic motor neuron differentiation|protei…	None	9	3.09	2.93	9	4.08	4.23	3.97	6.76	0.0113	-1.86	11	0
ENSG00000164430	MB21D1	Mab-21 domain containing 1	cytosol|cytosol|	activation of innate immune response|positive regulation of defense response to virus by host|cyclic nucleotide biosynthetic process|positive regulation of type I interferon production|innate immune response|defense response to virus|cellular response to exogenous dsRNA|	DNA binding|ATP binding|GTP binding|metal ion binding|cyclic-GMP-AMP synthase activity|	9	2.76	1.61	9	5.88	5.91	4.76	6.75	0.0113	1.28	10.6	0
ENSG00000102401	ARMCX3	armadillo repeat containing, X-linked 3	integral component of mitochondrial outer membrane|	cellular protein localization|positive regulation of transcription from RNA polymerase II promoter|	None	9	-2.76	8.94	10	0	0	-2.36	6.75	0.0113	-8.13	-0.44	0
ENSG00000126883	NUP214	nucleoporin 214kDa	nucleus|nuclear pore|nucleoplasm|cytosol|focal adhesion|intracellular membrane-bounded organelle|	mitotic cell cycle|carbohydrate metabolic process|mRNA export from nucleus|protein import into nucleus|protein export from nucleus|mitotic nuclear envelope disassembly|hexose transport|gene expression|regulation of glucose transport|glucose transport|viral process|RNA metabolic process|mRNA metabolic process|cytokine-mediated signaling pathway|small molecule metabolic process|regulation of cell c…	transporter activity|nucleocytoplasmic transporter activity|protein binding|	5	3.59	4.86	6	2.41	2.38	3.48	6.75	0.0113	0.78	7.99	0
ENSG00000111716	LDHB	lactate dehydrogenase B	cytoplasm|cytoplasm|mitochondrion|cytosol|membrane|extracellular vesicular exosome|	lactate metabolic process|pyruvate metabolic process|glycolytic process|NAD metabolic process|cellular metabolic process|cellular carbohydrate metabolic process|small molecule metabolic process|oxidation-reduction process|	L-lactate dehydrogenase activity|protein binding|kinase binding|identical protein binding|NAD binding|	10	-1.83	7.18	10	-0.77	0.306	-1.6	6.75	0.0113	-5.07	-0.14	0
ENSG00000172538	FAM170B	family with sequence similarity 170, member B	None	None	None	10	1.59	0.281	10	-2.88	9.36	-2.63	6.74	0.0113	-7.76	-0.8	0
ENSG00000188846	RPL14	ribosomal protein L14	cytoplasm|cytosol|membrane|cytosolic large ribosomal subunit|extracellular vesicular exosome|	nuclear-transcribed mRNA catabolic process, nonsense-mediated decay|rRNA processing|translation|translation|translational initiation|translational elongation|translational termination|SRP-dependent cotranslational protein targeting to membrane|gene expression|viral process|RNA metabolic process|mRNA metabolic process|viral life cycle|viral transcription|ribosomal large subunit biogenesis|cellular…	RNA binding|structural constituent of ribosome|protein binding|poly(A) RNA binding|	6	3.58	4.83	7	2.5	2.61	3.07	6.73	0.0114	0.52	7.3	0
ENSG00000124181	PLCG1	phospholipase C, gamma 1	ruffle|cytoplasm|cytosol|cytosol|plasma membrane|plasma membrane|COP9 signalosome|lamellipodium|cell projection|	activation of MAPKK activity|in utero embryonic development|signal transduction|signal transduction|epidermal growth factor receptor signaling pathway|epidermal growth factor receptor signaling pathway|activation of phospholipase C activity|axon guidance|blood coagulation|fibroblast growth factor receptor signaling pathway|phospholipid catabolic process|positive regulation of epithelial cell migr…	phosphatidylinositol phospholipase C activity|phosphatidylinositol phospholipase C activity|phospholipase C activity|receptor signaling protein activity|neurotrophin TRKA receptor binding|calcium ion binding|protein binding|protein kinase binding|receptor tyrosine kinase binding|glutamate receptor binding|	10	1.89	3.2	10	2.68	3.97	2.48	6.73	0.0114	0.31	5.65	0
ENSG00000231824	C18ORF42	chromosome 18 open reading frame 42	None	None	None	8	2.7	1.99	8	3.05	5.09	2.95	6.72	0.0114	0.36	6.95	0
ENSG00000115694	STK25	serine/threonine kinase 25	Golgi apparatus|	protein phosphorylation|response to oxidative stress|establishment or maintenance of cell polarity|signal transduction|signal transduction by phosphorylation|positive regulation of axonogenesis|Golgi localization|	protein kinase activity|protein serine/threonine kinase activity|protein binding|ATP binding|protein homodimerization activity|metal ion binding|	10	5.29	2.9	9	3.81	4.59	4.05	6.71	0.0115	0.78	9.75	0
ENSG00000120837	NFYB	nuclear transcription factor Y, beta	nucleus|nucleoplasm|CCAAT-binding factor complex|	transcription, DNA-templated|regulation of transcription, DNA-templated|cellular lipid metabolic process|small molecule metabolic process|positive regulation of transcription, DNA-templated|	DNA binding|sequence-specific DNA binding transcription factor activity|protein binding|sequence-specific DNA binding|protein heterodimerization activity|repressing transcription factor binding|	9	3.79	4.47	9	6.04	3.05	5.77	6.7	0.0115	0.7	11.2	0
ENSG00000269897	COMMD3-BMI1	COMMD3-BMI1 readthrough	None	None	None	10	-3.45	8.48	10	1.68	0.702	-3.16	6.7	0.0115	-10	1.97	0
ENSG00000250423	KIAA1210	KIAA1210	None	None	None	10	3.22	5.05	10	2.55	2.06	2.94	6.7	0.0115	0.41	6.31	0
ENSG00000130045	NXNL2	nucleoredoxin-like 2	None	visual perception|sensory perception of smell|	None	9	2.77	3.29	9	4.36	4.43	3.41	6.69	0.0116	0.51	8.5	0
ENSG00000243641	OR13C7P	olfactory receptor, family 13, subfamily C, member 7 pseudogene	None	None	None	10	3.65	3.14	10	4.07	3.9	3.68	6.69	0.0116	0.51	8.09	0
ENSG00000141568	FOXK2	forkhead box K2	nucleus|nucleus|intracellular membrane-bounded organelle|	transcription, DNA-templated|regulation of transcription, DNA-templated|regulation of transcription from RNA polymerase II promoter|positive regulation of transcription from RNA polymerase II promoter|	magnesium ion binding|RNA polymerase II core promoter proximal region sequence-specific DNA binding|RNA polymerase II core promoter proximal region sequence-specific DNA binding transcription factor activity involved in positive regulation of transcription|sequence-specific DNA binding transcription factor activity|protein binding|sequence-specific DNA binding|	10	3.32	3.63	10	2.89	3.45	3.09	6.68	0.0116	0.44	6.59	0
ENSG00000163349	HIPK1	homeodomain interacting protein kinase 1	nucleus|cytoplasm|PML body|nuclear speck|	eye development|transcription, DNA-templated|regulation of transcription, DNA-templated|protein phosphorylation|smoothened signaling pathway|positive regulation of cell proliferation|anterior/posterior pattern specification|regulation of tumor necrosis factor-mediated signaling pathway|retina layer formation|protein desumoylation|neuron differentiation|intrinsic apoptotic signaling pathway in res…	protein serine/threonine kinase activity|protein binding|ATP binding|identical protein binding|	8	-0.74	1.01	8	-2.48	7.26	-1.98	6.68	0.0116	-7	2.69	0
ENSG00000137440	FGFBP1	fibroblast growth factor binding protein 1	extracellular space|plasma membrane|cell surface|	signal transduction|cell-cell signaling|positive regulation of cell proliferation|negative regulation of cell proliferation|positive regulation of fibroblast growth factor receptor signaling pathway|	protein binding|heparin binding|fibroblast growth factor binding|	10	-3.31	9.1	10	0	0	-3.1	6.67	0.0117	-8.95	-1.1	0
ENSG00000130303	BST2	bone marrow stromal cell antigen 2	cytoplasm|cytoplasm|late endosome|Golgi apparatus|plasma membrane|integral component of plasma membrane|cell surface|membrane|apical plasma membrane|anchored component of membrane|membrane raft|extracellular vesicular exosome|	negative regulation of plasmacytoid dendritic cell cytokine production|humoral immune response|signal transduction|cell-cell signaling|multicellular organismal development|cell proliferation|response to virus|negative regulation of endopeptidase activity|negative regulation of cell growth|negative regulation of cell migration|regulation of actin cytoskeleton organization|response to interferon-ga…	signal transducer activity|protein binding|metalloendopeptidase inhibitor activity|protein homodimerization activity|poly(A) RNA binding|	10	7.51	4.13	10	8	2.9	7.62	6.67	0.0117	2.57	15.6	0
ENSG00000167107	ACSF2	acyl-CoA synthetase family member 2	mitochondrion|	fatty acid metabolic process|	ATP binding|ligase activity|	10	-3.05	9.09	10	0.22	0.00548	-2.83	6.67	0.0117	-8.71	-0.66	0
ENSG00000256574	OR13A1	olfactory receptor, family 13, subfamily A, member 1	plasma membrane|integral component of membrane|	G-protein coupled receptor signaling pathway|detection of chemical stimulus involved in sensory perception of smell|	G-protein coupled receptor activity|olfactory receptor activity|	10	2.52	3.16	10	3.11	3.92	2.75	6.66	0.0117	0.34	6.36	0
ENSG00000131398	KCNC3	potassium voltage-gated channel, Shaw-related subfamily, member 3	plasma membrane|voltage-gated potassium channel complex|axolemma|neuromuscular junction|dendrite membrane|neuronal cell body membrane|axon terminus|	potassium ion transport|synaptic transmission|cell death|regulation of ion transmembrane transport|regulation of neurotransmitter secretion|protein homooligomerization|potassium ion transmembrane transport|	voltage-gated potassium channel activity|delayed rectifier potassium channel activity|	10	1.97	2.65	10	4.44	5.62	3.02	6.66	0.0117	0.39	7.88	0
ENSG00000110848	CD69	CD69 molecule	integral component of plasma membrane|external side of plasma membrane|	signal transduction|cellular response to drug|	transmembrane signaling receptor activity|calcium ion binding|carbohydrate binding|	8	5.84	3.84	8	5.2	3.2	5.69	6.65	0.0118	2.13	12.1	0
ENSG00000168090	COPS6	COP9 signalosome subunit 6	nucleus|cytoplasm|COP9 signalosome|extracellular vesicular exosome|	cullin deneddylation|viral process|	protein binding|	7	8.01	4.96	6	4.21	3.37	5.91	6.64	0.0118	1.4	15.1	0
ENSG00000181625	SLX1B	SLX1 structure-specific endonuclease subunit homolog B (S. cerevisiae)	None	None	None	9	4.26	6.81	9	2.03	1.28	3.59	6.64	0.0118	0.59	7.71	0
ENSG00000187257	RSBN1L	round spermatid basic protein 1-like	nucleus|	None	None	10	2.42	1	10	3.7	5.95	3.64	6.63	0.0118	0.56	8.85	0
ENSG00000112658	SRF	serum response factor (c-fos serum response element-binding transcription factor)	nuclear chromatin|nucleus|cytoplasm|	patterning of blood vessels|response to hypoxia|mesoderm formation|neuron migration|trophectodermal cell differentiation|heart looping|morphogenesis of an epithelial sheet|cell migration involved in sprouting angiogenesis|positive regulation of transcription from RNA polymerase II promoter involved in myocardial precursor cell differentiation|transcription from RNA polymerase II promoter|cell-mat…	RNA polymerase II core promoter proximal region sequence-specific DNA binding|RNA polymerase II core promoter sequence-specific DNA binding transcription factor activity|RNA polymerase II transcription factor binding transcription factor activity|RNA polymerase II core promoter proximal region sequence-specific DNA binding transcription factor activity involved in positive regulation of transcrip…	9	2.24	2.48	9	2.91	4.65	2.67	6.63	0.0118	0.39	5.97	0
ENSG00000261832	CLN3	ceroid-lipofuscinosis, neuronal 3	Golgi membrane|nucleus|cytoplasm|mitochondrion|lysosome|lysosomal membrane|early endosome|late endosome|late endosome|autophagic vacuole|endoplasmic reticulum|Golgi apparatus|Golgi stack|trans-Golgi network|plasma membrane|caveola|synaptic vesicle|integral component of membrane|integral component of endoplasmic reticulum membrane|neuron projection|membrane raft|	autophagic vacuole fusion|action potential|globoside metabolic process|cellular amino acid metabolic process|ceramide metabolic process|glucosylceramide metabolic process|galactosylceramide metabolic process|sphingomyelin metabolic process|receptor-mediated endocytosis|vacuolar transport|lysosome organization|lysosomal lumen acidification|cell death|associative learning|arginine transport|macroau…	protein binding|unfolded protein binding|	10	3.69	5.07	10	3.13	1.9	3.23	6.62	0.0119	0.51	6.85	0
ENSG00000124216	SNAI1	snail family zinc finger 1	nucleus|nucleus|cytoplasm|cytoplasm|	negative regulation of transcription from RNA polymerase II promoter|negative regulation of transcription from RNA polymerase II promoter|negative regulation of transcription from RNA polymerase II promoter|osteoblast differentiation|mesoderm formation|epithelial to mesenchymal transition|epithelial to mesenchymal transition|positive regulation of epithelial to mesenchymal transition|positive reg…	RNA polymerase II core promoter proximal region sequence-specific DNA binding transcription factor activity involved in negative regulation of transcription|protein binding|kinase binding|sequence-specific DNA binding|metal ion binding|	10	-1.14	2.16	10	-1.44	4.83	-1.24	6.61	0.0119	-4.69	0.23	0
ENSG00000166822	TMEM170A	transmembrane protein 170A	integral component of membrane|	None	None	10	2.35	1.49	10	3.32	5.45	3.23	6.61	0.0119	0.44	7	0
ENSG00000170185	USP38	ubiquitin specific peptidase 38	None	ubiquitin-dependent protein catabolic process|protein deubiquitination|	ubiquitin-specific protease activity|	10	2.48	1.91	10	3.36	5.27	3.11	6.61	0.0119	0.39	6.71	0
ENSG00000137869	CYP19A1	cytochrome P450, family 19, subfamily A, polypeptide 1	endoplasmic reticulum|endoplasmic reticulum membrane|membrane|	steroid biosynthetic process|estrogen biosynthetic process|xenobiotic metabolic process|steroid metabolic process|androgen metabolic process|sterol metabolic process|small molecule metabolic process|oxidation-reduction process|prostate gland growth|	iron ion binding|electron carrier activity|oxidoreductase activity, acting on paired donors, with incorporation or reduction of molecular oxygen, reduced flavin or flavoprotein as one donor, and incorporation of one atom of oxygen|oxygen binding|heme binding|aromatase activity|	10	-1.78	7.28	10	1.93	2.05	-1.58	6.6	0.012	-5.54	4.07	0
ENSG00000111707	SUDS3	suppressor of defective silencing 3 homolog (S. cerevisiae)	nucleus|cytoplasm|plasma membrane|Sin3 complex|	negative regulation of transcription from RNA polymerase II promoter|transcription, DNA-templated|apoptotic process|histone deacetylation|substantia nigra development|positive regulation of apoptotic process|negative regulation of transcription, DNA-templated|	histone deacetylase activity|protein binding|enzyme binding|protein homodimerization activity|histone deacetylase binding|	8	2.27	3.22	9	2.09	3.71	2.2	6.58	0.0121	0.29	5.19	0
ENSG00000114251	WNT5A	wingless-type MMTV integration site family, member 5A	extracellular region|proteinaceous extracellular matrix|extracellular space|endoplasmic reticulum lumen|Golgi lumen|plasma membrane|cell surface|clathrin-coated endocytic vesicle membrane|extracellular vesicular exosome|	activation of MAPK activity|ameboidal cell migration|establishment of planar polarity|somitogenesis|epithelial to mesenchymal transition|neural tube closure|positive regulation of endothelial cell proliferation|heart looping|positive regulation of mesenchymal cell proliferation|lens development in camera-type eye|positive regulation of cytokine secretion involved in immune response|type B pancrea…	sequence-specific DNA binding transcription factor activity|frizzled binding|frizzled-2 binding|receptor tyrosine kinase-like orphan receptor binding|cytokine activity|protein domain specific binding|transcription regulatory region DNA binding|receptor agonist activity|	9	-1.86	4.03	9	-1.77	2.88	-1.82	6.58	0.0121	-5.51	-0.19	0
ENSG00000162456	KNCN	kinocilin	microtubule|integral component of membrane|apical plasma membrane|cuticular plate|neuronal cell body|kinocilium|	None	None	10	3.27	5.31	10	2.26	1.96	2.64	6.58	0.0121	0.33	6.73	0
ENSG00000156535	CD109	CD109 molecule	extracellular space|plasma membrane|anchored component of membrane|	negative regulation of endopeptidase activity|negative regulation of transforming growth factor beta receptor signaling pathway|negative regulation of wound healing|	serine-type endopeptidase inhibitor activity|transforming growth factor beta binding|	10	-0.63	0.507	10	-2.42	7.65	-1.92	6.58	0.0121	-6.69	-0.12	0
ENSG00000132359	RAP1GAP2	RAP1 GTPase activating protein 2	cytoplasm|centrosome|cytosol|nuclear membrane|perinuclear region of cytoplasm|	positive regulation of GTPase activity|regulation of small GTPase mediated signal transduction|	GTPase activator activity|	10	4.46	5.56	10	4.4	1.29	4.44	6.57	0.0121	0.29	10	0
ENSG00000137074	APTX	aprataxin	chromatin|nuclear chromatin|nucleus|nucleoplasm|nucleolus|cytoplasm|	single strand break repair|DNA catabolic process, exonucleolytic|DNA catabolic process, exonucleolytic|DNA ligation|double-strand break repair|cellular response to DNA damage stimulus|cell death|dephosphorylation|regulation of protein stability|response to hydrogen peroxide|polynucleotide 3' dephosphorylation|	chromatin binding|damaged DNA binding|double-stranded DNA binding|double-stranded RNA binding|protein binding|phosphoglycolate phosphatase activity|DNA 5'-adenosine monophosphate hydrolase activity|polynucleotide 3'-phosphatase activity|metal ion binding|protein N-terminus binding|phosphoprotein binding|	10	0.51	0.173	10	-2.61	8.5	-2.26	6.57	0.0121	-7.5	-0.29	0
ENSG00000072310	SREBF1	sterol regulatory element binding transcription factor 1	Golgi membrane|nucleus|nuclear envelope|nucleoplasm|cytoplasm|endoplasmic reticulum|endoplasmic reticulum membrane|cytosol|ER to Golgi transport vesicle membrane|integral component of membrane|protein complex|	negative regulation of transcription from RNA polymerase II promoter|regulation of heart rate by chemical signal|transcription, DNA-templated|regulation of transcription from RNA polymerase II promoter|lipid metabolic process|aging|cholesterol metabolic process|insulin receptor signaling pathway|lipid biosynthetic process|cellular response to starvation|response to glucose|positive regulation of …	DNA binding|chromatin binding|sequence-specific DNA binding transcription factor activity|protein binding|protein kinase binding|protein complex binding|sterol response element binding|sequence-specific DNA binding|protein dimerization activity|	10	1.91	3.84	10	2.92	3.24	2.38	6.56	0.0122	0.32	5.74	0
ENSG00000187860	CCDC157	coiled-coil domain containing 157	None	None	None	10	3.11	3.19	10	3.03	3.69	3.07	6.56	0.0122	0.32	7.56	0
ENSG00000221855	TAS2R41	taste receptor, type 2, member 41	plasma membrane|integral component of membrane|	G-protein coupled receptor signaling pathway|	None	10	2.86	6.09	10	1.43	1.38	2.47	6.55	0.0122	0.28	5.84	0
ENSG00000140323	DISP2	dispatched homolog 2 (Drosophila)	cellular_component|integral component of membrane|	smoothened signaling pathway|	molecular_function|	10	3.35	5.28	10	2.74	1.69	3.13	6.55	0.0122	0.38	7.17	0
ENSG00000149150	SLC43A1	solute carrier family 43 (amino acid system L transporter), member 1	plasma membrane|integral component of plasma membrane|	ion transport|amino acid transport|neutral amino acid transport|transmembrane transport|L-alpha-amino acid transmembrane transport|	neutral amino acid transmembrane transporter activity|L-amino acid transmembrane transporter activity|	10	3.39	4.15	10	3.16	2.74	3.31	6.54	0.0123	0.4	7.63	0
ENSG00000159592	GPBP1L1	GC-rich promoter binding protein 1-like 1	nucleus|	transcription, DNA-templated|positive regulation of transcription, DNA-templated|	DNA binding|sequence-specific DNA binding transcription factor activity|	9	3.41	1.76	9	4.34	5.28	4.02	6.54	0.0123	0.76	8.73	0
ENSG00000101198	NKAIN4	Na+/K+ transporting ATPase interacting 4	plasma membrane|integral component of membrane|	None	None	10	2.76	3.73	10	3.41	3.15	2.72	6.52	0.0124	-0.99	7.46	0
ENSG00000136048	DRAM1	DNA-damage regulated autophagy modulator 1	cytoplasm|lysosome|lysosomal membrane|integral component of membrane|	autophagy|apoptotic nuclear changes|execution phase of apoptosis|	None	10	3.91	5.66	10	2.15	2.14	2.84	6.52	0.0124	0.39	7.06	0
ENSG00000163092	XIRP2	xin actin-binding repeat containing 2	cell junction|	actin cytoskeleton organization|	actin binding|	10	3.53	4.06	9	3.18	2.8	3.47	6.52	0.0124	0.39	8.19	0
ENSG00000137745	MMP13	matrix metallopeptidase 13 (collagenase 3)	extracellular region|proteinaceous extracellular matrix|extracellular space|	proteolysis|extracellular matrix disassembly|extracellular matrix disassembly|extracellular matrix organization|bone mineralization|collagen catabolic process|collagen catabolic process|cellular protein metabolic process|cartilage development|bone morphogenesis|	metalloendopeptidase activity|calcium ion binding|collagen binding|zinc ion binding|	10	-2.25	6.63	10	-1.04	0.667	-1.66	6.52	0.0124	-6.37	-0.17	0
ENSG00000242185	CT45A2	cancer/testis antigen family 45, member A2	None	None	None	10	4.13	3.61	10	5.46	3.36	5.43	6.51	0.0124	0.76	11.1	0
ENSG00000013561	RNF14	ring finger protein 14	nucleus|cytoplasm|	transcription, DNA-templated|regulation of transcription, DNA-templated|regulation of transcription from RNA polymerase II promoter|signal transduction|protein ubiquitination|protein ubiquitination|androgen receptor signaling pathway|response to estradiol|positive regulation of transcription, DNA-templated|positive regulation of transcription, DNA-templated|regulation of androgen receptor signali…	transcription coactivator activity|transcription coactivator activity|protein binding|zinc ion binding|small conjugating protein ligase activity|androgen receptor binding|	10	2.93	5.06	10	1.79	2.11	2.68	6.51	0.0124	0.31	5.89	0
ENSG00000143398	PIP5K1A	phosphatidylinositol-4-phosphate 5-kinase, type I, alpha	nucleus|cytoplasm|cytosol|mRNA cleavage and polyadenylation specificity factor complex|plasma membrane|nuclear speck|nuclear speck|lamellipodium|ruffle membrane|	phospholipid metabolic process|glycerophospholipid metabolic process|phosphatidylinositol biosynthetic process|phagocytosis|signal transduction|phospholipid biosynthetic process|fibroblast migration|cell migration|keratinocyte differentiation|actin cytoskeleton reorganization|activation of Rac GTPase activity|small molecule metabolic process|phosphatidylinositol phosphorylation|phosphatidylinosit…	protein binding|ATP binding|1-phosphatidylinositol-4-phosphate 5-kinase activity|1-phosphatidylinositol-4-phosphate 5-kinase activity|kinase binding|	10	2.73	3.48	9	2.52	3.37	2.61	6.51	0.0124	0.37	5.8	0
ENSG00000110700	RPS13	ribosomal protein S13	nucleus|nucleolus|cytosol|ribosome|membrane|cytosolic small ribosomal subunit|extracellular vesicular exosome|	nuclear-transcribed mRNA catabolic process, nonsense-mediated decay|translation|translation|translational initiation|translational elongation|translational termination|SRP-dependent cotranslational protein targeting to membrane|gene expression|viral process|RNA metabolic process|mRNA metabolic process|viral life cycle|viral transcription|negative regulation of RNA splicing|cellular protein metabo…	mRNA binding|structural constituent of ribosome|protein binding|poly(A) RNA binding|	2	7.39	5.15	4	5.11	2.17	6.37	6.51	0.0124	2.82	14	0
ENSG00000232417	CT45A3	cancer/testis antigen family 45, member A3	None	None	None	10	4.13	3.61	10	5.46	3.36	5.43	6.51	0.0124	0.76	11.1	0
ENSG00000211866	TRAJ23	T cell receptor alpha joining 23	None	None	None	4	3.75	2.83	4	3.72	3.99	3.73	6.51	0.0124	1.32	7.87	0
ENSG00000232478	CT45A1	cancer/testis antigen family 45, member A1	None	None	None	10	4.13	3.61	10	5.46	3.36	5.43	6.51	0.0124	0.76	11.1	0
ENSG00000226907	CT45A6	cancer/testis antigen family 45, member A6	None	None	None	10	4.13	3.61	10	5.46	3.36	5.43	6.51	0.0124	0.76	11.1	0
ENSG00000113593	PPWD1	peptidylprolyl isomerase domain and WD repeat containing 1	nucleus|catalytic step 2 spliceosome|	mRNA splicing, via spliceosome|protein peptidyl-prolyl isomerization|protein folding|	peptidyl-prolyl cis-trans isomerase activity|	5	6.71	3.53	5	4.62	4.04	4.96	6.5	0.0125	1.57	13.6	0
ENSG00000124813	RUNX2	runt-related transcription factor 2	nuclear chromatin|nucleus|transcription factor complex|cytoplasm|	ossification|osteoblast differentiation|osteoblast differentiation|endochondral ossification|osteoblast fate commitment|chondrocyte development|osteoblast development|transcription initiation from RNA polymerase II promoter|positive regulation of cell proliferation|gene expression|T cell differentiation|BMP signaling pathway|positive regulation of chondrocyte differentiation|embryonic forelimb mo…	RNA polymerase II core promoter proximal region sequence-specific DNA binding|RNA polymerase II core promoter proximal region sequence-specific DNA binding transcription factor activity involved in positive regulation of transcription|chromatin binding|sequence-specific DNA binding transcription factor activity|protein binding|ATP binding|protein domain specific binding|bHLH transcription factor …	10	2.36	3.13	10	2.81	3.74	2.63	6.5	0.0125	0.3	6.55	0
ENSG00000196476	C20ORF96	chromosome 20 open reading frame 96	None	None	None	10	-1.36	3.54	10	4.07	3.66	4.25	6.49	0.0125	-2.28	10.5	0
ENSG00000132446	FTHL17	ferritin, heavy polypeptide-like 17	None	iron ion transport|cellular iron ion homeostasis|	ferric iron binding|	9	3.25	3.55	9	2.56	3.32	3.25	6.49	0.0125	0.42	6.67	0
ENSG00000091986	CCDC80	coiled-coil domain containing 80	basement membrane|interstitial matrix|	positive regulation of cell-substrate adhesion|extracellular matrix organization|	fibronectin binding|heparin binding|	9	3.05	4.69	10	2.16	2.38	2.93	6.49	0.0125	0.35	6.49	0
ENSG00000173068	BNC2	basonuclin 2	nucleus|cytoplasm|plasma membrane|	endochondral bone growth|transcription, DNA-templated|regulation of transcription, DNA-templated|tongue development|palate development|mesenchyme development|	DNA binding|metal ion binding|	10	4.37	1.24	9	5.67	5.86	5.46	6.48	0.0126	1.15	12.2	0
ENSG00000171793	CTPS1	CTP synthase 1	cellular_component|cytosol|membrane|	nucleobase-containing compound metabolic process|CTP biosynthetic process|glutamine metabolic process|nucleobase-containing small molecule interconversion|response to drug|'de novo' CTP biosynthetic process|small molecule metabolic process|nucleobase-containing small molecule metabolic process|	CTP synthase activity|CTP synthase activity|CTP synthase activity|ATP binding|	5	3.01	1.72	6	5.08	5.6	3.95	6.48	0.0126	0.89	11.1	0
ENSG00000134809	TIMM10	translocase of inner mitochondrial membrane 10 homolog (yeast)	mitochondrion|mitochondrial inner membrane|mitochondrial inner membrane|mitochondrial inner membrane presequence translocase complex|mitochondrial intermembrane space|mitochondrial intermembrane space protein transporter complex|	protein targeting to mitochondrion|sensory perception of sound|cellular protein metabolic process|protein import into mitochondrial inner membrane|protein import into mitochondrial inner membrane|chaperone-mediated protein transport|	transporter activity|protein binding|zinc ion binding|protein homodimerization activity|chaperone binding|	5	4.27	4.55	7	3.21	2.32	3.93	6.47	0.0126	0.75	9.34	0
ENSG00000065308	TRAM2	translocation associated membrane protein 2	integral component of membrane|	protein transport|collagen biosynthetic process|	protein binding|	10	0	0	10	3.6	6.72	3.57	6.47	0.0126	0.64	9.39	0
ENSG00000155254	MARVELD1	MARVEL domain containing 1	nucleus|cytoplasm|cytoskeleton|plasma membrane|integral component of membrane|	cell cycle|	None	10	-3.13	8.31	10	0.93	0.279	-2.77	6.47	0.0126	-8.99	-0.75	0
ENSG00000173988	LRRC63	leucine rich repeat containing 63	None	None	None	10	1.78	1.08	10	2.68	5.99	2.43	6.46	0.0127	0.11	6.26	0
ENSG00000117090	SLAMF1	signaling lymphocytic activation molecule family member 1	external side of plasma membrane|integral component of membrane|extracellular vesicular exosome|	signal transduction|positive regulation of cell proliferation|viral process|lymphocyte activation|	antigen binding|transmembrane signaling receptor activity|protein binding|	10	1.56	0.668	10	5.76	6.99	5.44	6.46	0.0127	0.78	11.4	0
ENSG00000205138	SDHAF1	succinate dehydrogenase complex assembly factor 1	mitochondrion|mitochondrial matrix|	iron-sulfur cluster assembly|mitochondrial respiratory chain complex II assembly|	None	10	-0.97	2.37	10	-1.5	4.64	-1.26	6.46	0.0127	-4.4	0.29	0
ENSG00000109851	DBX1	developing brain homeobox 1	nucleus|	regulation of transcription, DNA-templated|multicellular organismal development|	transcription regulatory region sequence-specific DNA binding|sequence-specific DNA binding transcription factor activity|	9	3.54	5.52	9	1.89	1.7	3.15	6.46	0.0127	0.41	7.09	0
ENSG00000100934	SEC23A	Sec23 homolog A (S. cerevisiae)	Golgi membrane|endoplasmic reticulum|endoplasmic reticulum membrane|cytosol|ER to Golgi transport vesicle membrane|COPII vesicle coat|smooth endoplasmic reticulum membrane|perinuclear region of cytoplasm|	antigen processing and presentation of peptide antigen via MHC class I|intracellular protein transport|ER to Golgi vesicle-mediated transport|vesicle-mediated transport|protein N-linked glycosylation via asparagine|antigen processing and presentation of exogenous peptide antigen via MHC class II|post-translational protein modification|cellular protein metabolic process|small molecule metabolic pr…	protein binding|zinc ion binding|	10	1.56	1.73	10	2.33	5.23	2.18	6.46	0.0127	0.24	4.8	0
ENSG00000157014	TATDN2	TatD DNase domain containing 2	nucleoplasm|intracellular organelle|	DNA catabolic process, endonucleolytic|DNA catabolic process|activation of signaling protein activity involved in unfolded protein response|endoplasmic reticulum unfolded protein response|cellular protein metabolic process|	deoxyribonuclease activity|endodeoxyribonuclease activity, producing 5'-phosphomonoesters|metal ion binding|	10	2.39	3.99	10	2.24	2.8	2.28	6.46	0.0127	0.27	4.98	0
ENSG00000213030	CGB8	chorionic gonadotropin, beta polypeptide 8	None	None	None	9	3.07	5.07	9	3.24	1.69	3.16	6.46	0.0127	0.37	7.15	0
ENSG00000131015	ULBP2	UL16 binding protein 2	extracellular space|cell surface|anchored component of plasma membrane|	antigen processing and presentation|natural killer cell activation|natural killer cell mediated cytotoxicity|	natural killer cell lectin-like receptor binding|	10	3.98	5.06	10	3.58	1.73	3.84	6.45	0.0127	0.46	8.28	0
ENSG00000163393	SLC22A15	solute carrier family 22, member 15	integral component of membrane|	ion transport|transmembrane transport|	transmembrane transporter activity|	10	6.39	5.72	10	6.75	0.998	6.59	6.45	0.0127	1.94	13.7	0
ENSG00000101811	CSTF2	cleavage stimulation factor, 3' pre-RNA, subunit 2, 64kDa	nucleus|nucleoplasm|mRNA cleavage and polyadenylation specificity factor complex|cleavage body|	mRNA splicing, via spliceosome|transcription from RNA polymerase II promoter|termination of RNA polymerase II transcription|mRNA polyadenylation|mRNA cleavage|RNA splicing|gene expression|mRNA 3'-end processing|	nucleotide binding|RNA binding|protein binding|poly(A) RNA binding|	10	10.5	5.45	9	7.6	1.91	9.51	6.45	0.0127	5.37	20	0
ENSG00000159873	CCDC117	coiled-coil domain containing 117	None	None	None	10	2.07	2.38	10	2.15	4.38	2.11	6.45	0.0127	0.17	5.26	0
ENSG00000051108	HERPUD1	homocysteine-inducible, endoplasmic reticulum stress-inducible, ubiquitin-like domain member 1	endoplasmic reticulum membrane|endoplasmic reticulum membrane|membrane|integral component of membrane|	ubiquitin-dependent protein catabolic process|cellular calcium ion homeostasis|response to unfolded protein|activation of signaling protein activity involved in unfolded protein response|endoplasmic reticulum unfolded protein response|regulation of protein ubiquitination|positive regulation of protein binding|negative regulation of cysteine-type endopeptidase activity involved in apoptotic proces…	molecular_function|	9	2.8	3.84	9	2.81	2.92	2.8	6.44	0.0128	0.27	7.09	0
ENSG00000185664	PMEL	premelanosome protein	extracellular region|endoplasmic reticulum membrane|Golgi apparatus|plasma membrane|integral component of membrane|multivesicular body membrane|melanosome|	melanosome organization|melanin biosynthetic process|	protein binding|	10	5.37	6.66	10	2.97	1.04	4.7	6.43	0.0128	0.91	10.5	0
ENSG00000100307	CBX7	chromobox homolog 7	nuclear chromatin|heterochromatin|nucleus|cytoplasm|PcG protein complex|PRC1 complex|	negative regulation of transcription from RNA polymerase II promoter|transcription, DNA-templated|chromatin modification|	chromatin binding|single-stranded RNA binding|protein binding|methylated histone binding|	10	3.11	3.51	10	3.13	3.23	3.12	6.42	0.0129	0.31	6.61	0
ENSG00000048649	RSF1	remodeling and spacing factor 1	nucleus|nucleoplasm|RSF complex|	nucleosome assembly|nucleosome assembly|chromatin remodeling|DNA-templated transcription, initiation|nucleosome positioning|centromere-specific nucleosome assembly|negative regulation of DNA binding|negative regulation of transcription, DNA-templated|positive regulation of transcription, DNA-templated|positive regulation of viral transcription|	protein binding|zinc ion binding|histone binding|	9	2.8	3.58	9	5.12	3.23	2.69	6.42	0.0129	0.26	8.73	0
ENSG00000165383	LRRC18	leucine rich repeat containing 18	cytoplasm|	None	None	9	2.28	2.64	9	3.51	4.25	3.33	6.41	0.0129	0.41	7.56	0
ENSG00000156471	PTDSS1	phosphatidylserine synthase 1	endoplasmic reticulum membrane|endoplasmic reticulum membrane|membrane|membrane|integral component of membrane|	phospholipid metabolic process|phosphatidylserine biosynthetic process|phosphatidylserine biosynthetic process|small molecule metabolic process|glycerophospholipid biosynthetic process|	transferase activity|	10	-1.09	2.34	10	-2.93	5.95	-2.08	6.4	0.013	-7.6	-0.02	0
ENSG00000159189	C1QC	complement component 1, q subcomponent, C chain	extracellular region|extracellular region|collagen trimer|extracellular space|extracellular vesicular exosome|blood microparticle|	immune response|complement activation|complement activation, classical pathway|negative regulation of granulocyte differentiation|innate immune response|negative regulation of macrophage differentiation|	None	9	3.46	4.41	10	2.69	2.35	3.46	6.4	0.013	0.48	6.9	0
ENSG00000125657	TNFSF9	tumor necrosis factor (ligand) superfamily, member 9	extracellular space|plasma membrane|integral component of membrane|	apoptotic process|immune response|signal transduction|cell-cell signaling|cell proliferation|positive regulation of interferon-gamma production|positive regulation of interleukin-12 production|positive regulation of interleukin-6 production|positive regulation of activated T cell proliferation|myeloid dendritic cell differentiation|positive regulation of cytotoxic T cell differentiation|	receptor binding|cytokine activity|tumor necrosis factor receptor binding|	10	1.85	1.91	10	-3.38	9.21	-3.27	6.4	0.013	-10	1.02	0
ENSG00000115604	IL18R1	interleukin 18 receptor 1	plasma membrane|integral component of membrane|	immune response|signal transduction|natural killer cell activation|positive regulation of interferon-gamma production|interleukin-18-mediated signaling pathway|positive regulation of NF-kappaB import into nucleus|T-helper 1 cell differentiation|	receptor activity|interleukin-1 receptor activity|interleukin-18 receptor activity|	10	9.6	3.69	10	7.97	3.23	8.47	6.39	0.013	4.51	18.9	0
ENSG00000125347	IRF1	interferon regulatory factor 1	nuclear chromatin|nucleus|nucleoplasm|cytoplasm|cytosol|	regulation of adaptive immune response|transcription from RNA polymerase II promoter|apoptotic process|cell cycle arrest|blood coagulation|negative regulation of cell proliferation|cytokine-mediated signaling pathway|positive regulation of type I interferon production|positive regulation of interferon-beta production|regulation of MyD88-dependent toll-like receptor signaling pathway|cellular resp…	RNA polymerase II core promoter proximal region sequence-specific DNA binding|DNA binding|sequence-specific DNA binding transcription factor activity|protein binding|	10	3.38	4.39	10	3	2.36	3.12	6.39	0.013	0.18	7.27	0
ENSG00000186051	TAL2	T-cell acute lymphocytic leukemia 2	None	transcription, DNA-templated|regulation of transcription, DNA-templated|post-embryonic development|thalamus development|midbrain development|multicellular organism growth|	DNA binding|protein dimerization activity|	10	-1.36	5.04	10	-0.97	1.73	-1.22	6.39	0.013	-3.96	0.17	0
ENSG00000213465	ARL2	ADP-ribosylation factor-like 2	nucleus|mitochondrial intermembrane space|centrosome|lateral plasma membrane|extracellular vesicular exosome|	GTP catabolic process|tubulin complex assembly|cell cycle|small GTPase mediated signal transduction|positive regulation of cell-substrate adhesion|regulation of microtubule polymerization|positive regulation of microtubule polymerization|negative regulation of GTPase activity|centrosome organization|maintenance of protein location in nucleus|tight junction assembly|	GTPase activity|GTPase inhibitor activity|protein binding|GTP binding|	4	4.59	4.35	5	5.97	2.48	4.81	6.38	0.0131	1.42	11.3	0
ENSG00000066027	PPP2R5A	protein phosphatase 2, regulatory subunit B', alpha	protein phosphatase type 2A complex|chromosome, centromeric region|nucleus|cytoplasm|membrane|Z disc|M band|	signal transduction|positive regulation of protein dephosphorylation|negative regulation of establishment of protein localization to plasma membrane|negative regulation of lipid kinase activity|	protein binding|protein phosphatase type 2A regulator activity|kinase binding|	10	-1.1	1.75	10	-1.67	5.16	-1.45	6.38	0.0131	-5.69	1.41	0
[truncated: 19,687 more rows]

## Sheet: GenomeWide_K562_GR20_Screen
#GeneID	Symbol	GeneInfo	Localization	Process	Function	# elements 1	casTLE Effect 1	casTLE Score 1	# elements 2	casTLE Effect 2	casTLE Score 2	Combo casTLE Effect	Combo casTLE Score	casTLE p-value	Minimum Effect Estimate	Maximum Effect Estimate	10% FDR
[truncated: 20,631 more rows]
