# Supplementary material for: CRISPR–Cas9 screens in human cells and primary neurons identify modifiers of C9ORF72 dipeptide-repeat-protein toxicity
Source: Springer Nature journal article supplement (doi:10.1038/s41588-018-0070-7), 2018-02-28
Supplement: MOESM5 [file 41588_2018_70_MOESM5_ESM.xlsx]

## Sheet: Screen Table Legend
Screen Table Legend
# elements		The # elements indicate the number of guides in either replicate
casTLE Effect		indicates the magnitude and sign of the effect, where a negative effect means the gene is depleted in the treated population and a positive effect means the gene is enriched in the treated population compared to untreated control
casTLE Score		indicates the statistical confidence-larger being more confident

## Sheet: Primary_Neuron_synthetic_PR20
#GeneID	Symbol	GeneInfo	Localization	Process	Function	# elements 1	casTLE Effect 1	casTLE Score 1	# elements 2	casTLE Effect 2	casTLE Score 2	Combo casTLE Effect	Combo casTLE Score	Minimum Effect Estimate	Maximum Effect Estimate
ENSMUSG00000079477	RAB7	RAB7, member RAS oncogene family	intracellular|cell|cytoplasm|lysosome|lysosome|endosome|late endosome|late endosome|late endosome|Golgi apparatus|membrane|cytoplasmic vesicle|intracellular membrane-bounded organelle|phagocytic vesicle|extracellular vesicular exosome|alveolar lamellar body|	GTP catabolic process|protein targeting to lysosome|transport|intracellular protein transport|epidermal growth factor catabolic process|small GTPase mediated signal transduction|endosome to lysosome transport|protein transport|early endosome to late endosome transport|bone resorption|phagosome acidification|phagosome-lysosome fusion|	nucleotide binding|GTPase activity|protein binding|GTP binding|GDP binding|Rac GTPase binding|	10	1.2	11.5	10	0.82	7.03	0.81	17.7	0.37	1.91
ENSMUSG00000022521	CREBBP	CREB binding protein	histone acetyltransferase complex|nuclear chromatin|condensed chromosome outer kinetochore|nucleus|nucleus|nucleoplasm|transcription factor complex|cytoplasm|nuclear body|	negative regulation of transcription from RNA polymerase II promoter|response to hypoxia|chromatin organization|regulation of transcription, DNA-templated|regulation of transcription, DNA-templated|transcription initiation from RNA polymerase II promoter|protein complex assembly|signal transduction|Notch signaling pathway|regulation of smoothened signaling pathway|gene expression|viral process|hi…	core promoter proximal region sequence-specific DNA binding|RNA polymerase II core promoter proximal region sequence-specific DNA binding transcription factor activity involved in negative regulation of transcription|RNA polymerase II transcription factor binding|RNA polymerase II activating transcription factor binding|RNA polymerase II transcription coactivator activity|RNA polymerase II transc…	10	-0.92	6.75	10	-0.57	9.88	-0.63	15.9	-1.21	-0.32
ENSMUSG00000037369	KDM6A	lysine (K)-specific demethylase 6A	nucleus|histone methyltransferase complex|	in utero embryonic development|neural tube closure|respiratory system process|heart development|somite rostral/caudal axis specification|mesodermal cell differentiation|notochord morphogenesis|histone H3-K4 methylation|oxidation-reduction process|canonical Wnt signaling pathway|histone H3-K27 demethylation|	RNA polymerase II core promoter proximal region sequence-specific DNA binding|metal ion binding|dioxygenase activity|histone demethylase activity (H3-K27 specific)|	10	0.78	6.13	10	0.54	3.45	0.71	8.77	0.19	1.46
ENSMUSG00000050017	PITPNB	phosphatidylinositol transfer protein, beta	Golgi membrane|endoplasmic reticulum membrane|extracellular vesicular exosome|	in utero embryonic development|lipid metabolic process|phospholipid metabolic process|phospholipid transport|small molecule metabolic process|glycerophospholipid biosynthetic process|	lipid binding|	10	0.2	0.665	10	0.88	9.51	0.64	8.5	0.19	1.62
ENSMUSG00000007815	RHOA	ras homolog family member A	cytosol|cytoskeleton|plasma membrane|cell cortex|lamellipodium|cell junction|midbody|cleavage furrow|apical junction complex|extracellular vesicular exosome|	GTP catabolic process|transforming growth factor beta receptor signaling pathway|small GTPase mediated signal transduction|Rho protein signal transduction|axon guidance|blood coagulation|viral process|substantia nigra development|actin cytoskeleton organization|platelet activation|regulation of cell migration|positive regulation of cytokinesis|regulation of osteoblast proliferation|cleavage furro…	GTPase activity|protein binding|GTP binding|myosin binding|	10	0.15	0.331	10	1.03	7.59	1	7.53	0.3	1.94
ENSMUSG00000051234	RNF7	ring finger protein 7	nucleus|nucleus|cytoplasm|cytoplasm|Cul5-RING ubiquitin ligase complex|	intrinsic apoptotic signaling pathway in response to oxidative stress|protein ubiquitination|negative regulation of apoptotic process|protein neddylation|response to redox state|	copper ion binding|protein binding|zinc ion binding|NEDD8 ligase activity|	10	-1.43	10.7	10	0.08	0.103	-1.4	7.49	-3	1.04
ENSMUSG00000027351	SPRED1	sprouty-related, EVH1 domain containing 1	nucleus|cytoplasm|caveola|	inactivation of MAPK activity|multicellular organismal development|negative regulation of peptidyl-threonine phosphorylation|negative regulation of phosphatase activity|positive regulation of DNA damage response, signal transduction by p53 class mediator|regulation of protein deacetylation|	stem cell factor receptor binding|protein binding|protein kinase binding|phosphatase binding|protein serine/threonine kinase inhibitor activity|	10	1.15	9.22	10	0.1	0.166	0.52	6.96	0.12	2.45
ENSMUSG00000032127	VPS11	vacuolar protein sorting 11 homolog (S. cerevisiae)	lysosomal membrane|endosome|endocytic vesicle|HOPS complex|late endosome membrane|	intracellular protein transport|vesicle-mediated transport|	nucleotide binding|protein binding|zinc ion binding|	10	1.02	7.33	10	0.25	0.979	0.45	6.78	0.06	2.17
ENSMUSG00000037490	SLC2A12	solute carrier family 2 (facilitated glucose transporter), member 12	plasma membrane|endomembrane system|integral component of membrane|perinuclear region of cytoplasm|	glucose transport|transmembrane transport|	substrate-specific transmembrane transporter activity|	10	-2.4	9.56	10	0.1	0.301	-2.39	5.94	-5	-0.55
ENSMUSG00000048154	KMT2D	lysine (K)-specific methyltransferase 2D	nucleus|histone methyltransferase complex|	oocyte growth|in utero embryonic development|chromatin silencing|transcription, DNA-templated|regulation of transcription, DNA-templated|positive regulation of cell proliferation|positive regulation of intracellular estrogen receptor signaling pathway|response to estrogen|positive regulation of transcription from RNA polymerase II promoter|oogenesis|histone H3-K4 methylation|	DNA binding|protein binding|zinc ion binding|histone-lysine N-methyltransferase activity|transcription regulatory region DNA binding|	10	0.63	5.58	10	0.3	1.42	0.47	5.66	-1.66	2
ENSMUSG00000055943	EMC7	ER membrane protein complex subunit 7	cytoplasm|integral component of membrane|integral component of membrane|ER membrane protein complex|	biological_process|	purine nucleotide binding|carbohydrate binding|	10	0.67	7.48	10	0.02	0.00363	0.6	5.4	0.06	1.49
ENSMUSG00000042557	SIN3A	SIN3 transcription regulator family member A	kinetochore|nucleus|nucleus|nucleoplasm|transcription factor complex|cytoplasm|Sin3 complex|Sin3 complex|transcriptional repressor complex|intercellular bridge|	negative regulation of transcription from RNA polymerase II promoter|in utero embryonic development|activation of innate immune response|positive regulation of defense response to virus by host|DNA replication|transcription, DNA-templated|protein deacetylation|aging|blood coagulation|response to organonitrogen compound|positive regulation of G2/M transition of mitotic cell cycle|positive regulati…	transcription regulatory region sequence-specific DNA binding|RNA polymerase II activating transcription factor binding|RNA polymerase II repressing transcription factor binding|RNA polymerase II transcription corepressor activity|chromatin binding|sequence-specific DNA binding transcription factor activity|transcription corepressor activity|protein binding|protein complex binding|protein deacety…	10	0.37	2.67	10	0.53	3.18	0.43	5.39	0.06	0.99
ENSMUSG00000039067	PSMD7	proteasome (prosome, macropain) 26S subunit, non-ATPase, 7	proteasome complex|nucleus|nucleoplasm|cytosol|proteasome regulatory particle|membrane|extracellular vesicular exosome|	G1/S transition of mitotic cell cycle|protein polyubiquitination|mitotic cell cycle|antigen processing and presentation of peptide antigen via MHC class I|antigen processing and presentation of exogenous peptide antigen via MHC class I, TAP-dependent|regulation of cellular amino acid metabolic process|apoptotic process|DNA damage response, signal transduction by p53 class mediator resulting in ce…	protein binding|	10	0.47	2.67	10	0.37	2.68	0.41	4.98	0.1	0.92
ENSMUSG00000020823	SEC14L1	SEC14-like 1 (S. cerevisiae)	Golgi apparatus|membrane|integral component of membrane|	transport|	None	10	0.37	2.11	10	0.46	2.63	0.42	4.41	0	1
ENSMUSG00000032422	SNX14	sorting nexin 14	integral component of membrane|	protein transport|termination of G-protein coupled receptor signaling pathway|	phosphatidylinositol binding|	10	-0.18	0.0381	10	0.64	5.81	0.55	4.2	-0.6	1.82
ENSMUSG00000026750	PSMB7	proteasome (prosome, macropain) subunit, beta type, 7	proteasome complex|nucleus|nucleoplasm|cytosol|proteasome core complex|microtubule cytoskeleton|extracellular vesicular exosome|	G1/S transition of mitotic cell cycle|protein polyubiquitination|mitotic cell cycle|antigen processing and presentation of peptide antigen via MHC class I|antigen processing and presentation of exogenous peptide antigen via MHC class I, TAP-dependent|regulation of cellular amino acid metabolic process|apoptotic process|DNA damage response, signal transduction by p53 class mediator resulting in ce…	threonine-type endopeptidase activity|protein binding|	10	0.64	3.48	10	0.25	1.97	0.36	4.16	-0.12	1.47
ENSMUSG00000024335	BRD2	bromodomain containing 2	nucleus|cytoplasm|	nucleosome assembly|transcription, DNA-templated|regulation of transcription from RNA polymerase II promoter|spermatogenesis|chromatin modification|	chromatin binding|protein binding|lysine-acetylated histone binding|	10	0.51	3.09	10	0.29	1.3	0.41	3.72	0	1.22
ENSMUSG00000034216	VPS18	vacuolar protein sorting 18 homolog (S. cerevisiae)	lysosomal membrane|early endosome|actin filament|HOPS complex|late endosome membrane|	intracellular protein transport|endosome organization|lysosome organization|vesicle-mediated transport|	actin binding|protein binding|metal ion binding|	10	0.54	4.65	10	0.08	0.13	0.47	3.7	-1.45	1
ENSMUSG00000020720	PSMD12	proteasome (prosome, macropain) 26S subunit, non-ATPase, 12	nucleoplasm|cytosol|proteasome regulatory particle|membrane|proteasome accessory complex|extracellular vesicular exosome|	G1/S transition of mitotic cell cycle|protein polyubiquitination|mitotic cell cycle|antigen processing and presentation of peptide antigen via MHC class I|antigen processing and presentation of exogenous peptide antigen via MHC class I, TAP-dependent|regulation of cellular amino acid metabolic process|apoptotic process|DNA damage response, signal transduction by p53 class mediator resulting in ce…	None	10	0.45	3.78	10	0.18	0.514	0.39	3.67	-0.06	1
ENSMUSG00000032030	CUL5	cullin 5	nucleus|cytosol|plasma membrane|Cul5-RING ubiquitin ligase complex|	G1/S transition of mitotic cell cycle|ubiquitin-dependent protein catabolic process|response to osmotic stress|cell cycle arrest|cell proliferation|negative regulation of cell proliferation|viral process|protein ubiquitination|cytosolic calcium ion homeostasis|calcium ion transmembrane transport|intrinsic apoptotic signaling pathway|	receptor activity|calcium channel activity|protein binding|ubiquitin protein ligase binding|	10	1.16	5.29	10	0.17	0.47	0.37	3.63	-2.96	3
ENSMUSG00000032570	ATP2C1	ATPase, Ca++ transporting, type 2C, member 1	Golgi membrane|Golgi membrane|Golgi apparatus|trans-Golgi network|membrane|integral component of membrane|	calcium ion transport|calcium ion transport|manganese ion transport|cellular calcium ion homeostasis|cellular calcium ion homeostasis|signal transduction|metabolic process|epidermis development|calcium-dependent cell-cell adhesion|cellular manganese ion homeostasis|actin cytoskeleton reorganization|Golgi calcium ion homeostasis|Golgi calcium ion transport|ion transmembrane transport|positive regu…	signal transducer activity|calcium-transporting ATPase activity|calcium-transporting ATPase activity|calcium ion binding|ATP binding|ATP binding|manganese-transporting ATPase activity|manganese ion binding|metal ion binding|	10	-0.05	0.0111	10	0.54	4.75	0.48	3.57	-0.3	1.63
ENSMUSG00000030751	PSMA1	proteasome (prosome, macropain) subunit, alpha type, 1	proteasome complex|nucleus|nucleoplasm|centrosome|cytosol|proteasome core complex|polysome|proteasome core complex, alpha-subunit complex|extracellular vesicular exosome|	G1/S transition of mitotic cell cycle|protein polyubiquitination|mitotic cell cycle|antigen processing and presentation of peptide antigen via MHC class I|antigen processing and presentation of exogenous peptide antigen via MHC class I, TAP-dependent|regulation of cellular amino acid metabolic process|apoptotic process|DNA damage response, signal transduction by p53 class mediator resulting in ce…	RNA binding|threonine-type endopeptidase activity|protein binding|	10	0.69	4.01	10	0.19	0.616	0.35	3.55	0	1.39
ENSMUSG00000018286	PSMB6	proteasome (prosome, macropain) subunit, beta type, 6	nucleus|nucleoplasm|cytosol|proteasome core complex|extracellular vesicular exosome|	G1/S transition of mitotic cell cycle|protein polyubiquitination|mitotic cell cycle|antigen processing and presentation of peptide antigen via MHC class I|antigen processing and presentation of exogenous peptide antigen via MHC class I, TAP-dependent|regulation of cellular amino acid metabolic process|apoptotic process|DNA damage response, signal transduction by p53 class mediator resulting in ce…	endopeptidase activity|threonine-type endopeptidase activity|	10	0.48	2.13	10	0.27	1.68	0.43	3.39	-0.31	1.43
ENSMUSG00000061461	SMIM20	small integral membrane protein 20	integral component of membrane|	None	None	10	-1.81	4.18	10	-0.25	1.35	-0.41	3.32	-3.39	0.22
ENSMUSG00000040761	SPEN	spen family transcriptional repressor	nucleus|transcriptional repressor complex|extracellular vesicular exosome|	negative regulation of transcription from RNA polymerase II promoter|transcription, DNA-templated|Notch signaling pathway|viral process|negative regulation of transcription, DNA-templated|positive regulation of transcription, DNA-templated|positive regulation of neurogenesis|	nucleotide binding|RNA polymerase II transcription factor binding|RNA polymerase II transcription factor binding transcription factor activity involved in negative regulation of transcription|single-stranded DNA binding|sequence-specific DNA binding transcription factor activity|transcription corepressor activity|protein binding|poly(A) RNA binding|	10	0.84	4.35	10	0.08	0.0917	0.35	3.16	0	1.58
ENSMUSG00000018189	UCHL5	ubiquitin carboxyl-terminal hydrolase L5	proteasome complex|nucleus|cytosol|Ino80 complex|Ino80 complex|	DNA repair|DNA recombination|transcription, DNA-templated|regulation of transcription, DNA-templated|ubiquitin-dependent protein catabolic process|transforming growth factor beta receptor signaling pathway|negative regulation of endopeptidase activity|protein deubiquitination|lateral ventricle development|negative regulation of transforming growth factor beta receptor signaling pathway|midbrain d…	ubiquitin-specific protease activity|endopeptidase inhibitor activity|protein binding|omega peptidase activity|poly(A) RNA binding|proteasome binding|	10	0.39	1.73	10	0.37	1.65	0.38	3.16	-0.94	1
ENSMUSG00000035569	ANKRD11	ankyrin repeat domain 11	nucleus|cytoplasm|plasma membrane|	in utero embryonic development|tissue homeostasis|multicellular organism growth|odontogenesis of dentin-containing tooth|skeletal system morphogenesis|face morphogenesis|bone development|	None	10	0.41	1.15	10	0.31	2.21	0.36	3.07	0.01	0.85
ENSMUSG00000022400	RBX1	ring-box 1, E3 ubiquitin protein ligase	nucleoplasm|cytosol|cytosol|SCF ubiquitin ligase complex|SCF ubiquitin ligase complex|VCB complex|cullin-RING ubiquitin ligase complex|Cul2-RING ubiquitin ligase complex|Cul3-RING ubiquitin ligase complex|Cul4A-RING E3 ubiquitin ligase complex|Cul4B-RING E3 ubiquitin ligase complex|Cul5-RING ubiquitin ligase complex|Cul7-RING ubiquitin ligase complex|	DNA repair|protein monoubiquitination|Notch signaling pathway|viral process|protein ubiquitination|SCF-dependent proteasomal ubiquitin-dependent protein catabolic process|SCF-dependent proteasomal ubiquitin-dependent protein catabolic process|proteasome-mediated ubiquitin-dependent protein catabolic process|protein neddylation|regulation of transcription from RNA polymerase II promoter in respons…	ubiquitin-protein transferase activity|ubiquitin-protein transferase activity|protein binding|zinc ion binding|NEDD8 ligase activity|ubiquitin protein ligase binding|protein complex binding|	10	0.22	0.894	10	0.74	3.74	0.5	2.99	-0.11	1.81
ENSMUSG00000031157	PQBP1	polyglutamine binding protein 1	nucleus|cytoplasm|cytoplasmic stress granule|nuclear speck|neuronal ribonucleoprotein granule|	alternative mRNA splicing, via spliceosome|transcription, DNA-templated|regulation of transcription, DNA-templated|neuron projection development|regulation of RNA splicing|	DNA binding|transcription coactivator activity|ribonucleoprotein complex binding|	10	-0.39	0.916	10	-0.49	2.33	-0.44	2.97	-1	0.19
ENSMUSG00000030103	BHLHE40	basic helix-loop-helix family, member e40	nucleus|nucleus|nucleolus|Golgi apparatus|	negative regulation of transcription from RNA polymerase II promoter|regulation of transcription, DNA-templated|transcription from RNA polymerase II promoter|transcription from RNA polymerase II promoter|transcription from RNA polymerase II promoter|circadian regulation of gene expression|entrainment of circadian clock by photoperiod|negative regulation of sequence-specific DNA binding transcript…	sequence-specific DNA binding RNA polymerase II transcription factor activity|RNA polymerase II core promoter proximal region sequence-specific DNA binding transcription factor activity involved in negative regulation of transcription|RNA polymerase II activating transcription factor binding|RNA polymerase II transcription factor binding transcription factor activity involved in negative regulati…	10	0.43	1.03	10	0.48	2.09	0.47	2.91	0.08	0.97
ENSMUSG00000028837	PSMB2	proteasome (prosome, macropain) subunit, beta type, 2	proteasome complex|nucleus|nucleoplasm|cytosol|proteasome core complex|membrane|extracellular vesicular exosome|	G1/S transition of mitotic cell cycle|protein polyubiquitination|mitotic cell cycle|antigen processing and presentation of peptide antigen via MHC class I|antigen processing and presentation of exogenous peptide antigen via MHC class I, TAP-dependent|regulation of cellular amino acid metabolic process|apoptotic process|DNA damage response, signal transduction by p53 class mediator resulting in ce…	threonine-type endopeptidase activity|protein binding|	10	0.28	1.39	10	0.4	1.74	0.36	2.79	0	0.85
ENSMUSG00000025137	PCYT2	phosphate cytidylyltransferase 2, ethanolamine	cellular_component|endoplasmic reticulum membrane|	phospholipid metabolic process|phosphatidylethanolamine biosynthetic process|phosphatidylethanolamine biosynthetic process|phospholipid biosynthetic process|small molecule metabolic process|glycerophospholipid biosynthetic process|	ethanolamine-phosphate cytidylyltransferase activity|	10	0.89	4.61	10	0.07	0.0872	0.38	2.71	0	1.66
ENSMUSG00000071909	GM806	predicted gene 806	cellular_component|	biological_process|	molecular_function|	10	0.28	1.02	10	0.34	1.86	0.32	2.66	0	0.84
ENSMUSG00000045374	WDR81	WD repeat domain 81	None	metabolic process|negative regulation of phosphatase activity|	transferase activity, transferring phosphorus-containing groups|	10	-0.33	0.169	10	-0.23	2.61	-0.24	2.58	-1	0.2
ENSMUSG00000015341	GOLGA7	golgin A7	palmitoyltransferase complex|Golgi stack|intrinsic component of Golgi membrane|extracellular vesicular exosome|	peptidyl-L-cysteine S-palmitoylation|Golgi to plasma membrane protein transport|protein stabilization|	protein binding|	10	-1.75	3.4	10	-0.23	0.73	-0.31	2.5	-2.6	0
ENSMUSG00000028932	PSMC2	proteasome (prosome, macropain) 26S subunit, ATPase, 2	proteasome complex|cytoplasmic mRNA processing body|nucleus|nucleoplasm|cytoplasm|cytosol|membrane|proteasome accessory complex|	G1/S transition of mitotic cell cycle|protein polyubiquitination|mitotic cell cycle|osteoblast differentiation|antigen processing and presentation of peptide antigen via MHC class I|antigen processing and presentation of exogenous peptide antigen via MHC class I, TAP-dependent|ATP catabolic process|ubiquitin-dependent protein catabolic process|regulation of cellular amino acid metabolic process|a…	protein binding|ATP binding|ATPase activity|	10	0.22	0.656	10	0.26	1.86	0.24	2.33	-0.44	0.95
ENSMUSG00000014769	PSMB1	proteasome (prosome, macropain) subunit, beta type, 1	proteasome complex|nucleus|nucleoplasm|cytosol|proteasome core complex|extracellular vesicular exosome|	G1/S transition of mitotic cell cycle|protein polyubiquitination|mitotic cell cycle|antigen processing and presentation of peptide antigen via MHC class I|antigen processing and presentation of exogenous peptide antigen via MHC class I, TAP-dependent|regulation of cellular amino acid metabolic process|apoptotic process|DNA damage response, signal transduction by p53 class mediator resulting in ce…	threonine-type endopeptidase activity|protein binding|	10	0.32	2.83	10	0.03	0.0227	0.24	2.11	0	0.78
ENSMUSG00000038384	SETD1B	SET domain containing 1B	nucleus|chromosome|nuclear speck|histone methyltransferase complex|Set1C/COMPASS complex|	transcription, DNA-templated|regulation of transcription, DNA-templated|histone H3-K4 methylation|	nucleotide binding|RNA binding|protein binding|histone methyltransferase activity (H3-K4 specific)|	10	0.61	2.78	10	-0.15	0.34	0.53	2.04	-1	1.26
ENSMUSG00000027634	NDRG3	NDRG family member 3	cytoplasm|extracellular vesicular exosome|	spermatogenesis|cell differentiation|negative regulation of cell growth|	molecular_function|	10	0.3	0.875	10	0.31	1.3	0.3	2.02	-0.74	1
ENSMUSG00000038784	CNOT4	CCR4-NOT transcription complex, subunit 4	nucleus|cytosol|CCR4-NOT complex|	nuclear-transcribed mRNA catabolic process, deadenylation-dependent decay|nuclear-transcribed mRNA poly(A) tail shortening|gene expression|RNA metabolic process|mRNA metabolic process|protein autoubiquitination|	nucleotide binding|ubiquitin-protein transferase activity|protein binding|zinc ion binding|ligase activity|poly(A) RNA binding|	10	0.53	2.06	10	0.2	0.579	0.35	1.96	0	1.35
ENSMUSG00000026812	TSC1	tuberous sclerosis 1	cytoplasm|cytosol|cytosol|actin filament|cell cortex|membrane|lamellipodium|growth cone|TSC1-TSC2 complex|intracellular membrane-bounded organelle|protein complex|	kidney development|neural tube closure|regulation of cell-matrix adhesion|rRNA export from nucleus|regulation of translation|potassium ion transport|cell cycle arrest|cell-matrix adhesion|negative regulation of cell proliferation|insulin receptor signaling pathway|negative regulation of translation|hippocampus development|cerebral cortex development|cell projection organization|negative regulatio…	protein binding|GTPase regulator activity|GTPase activating protein binding|protein N-terminus binding|chaperone binding|	10	-0.79	1.71	10	0.31	1.88	0.27	1.93	-1.47	0.99
ENSMUSG00000042548	ASXL1	additional sex combs like transcriptional regulator 1	nuclear chromatin|PR-DUB complex|extracellular vesicular exosome|	negative regulation of transcription from RNA polymerase II promoter|transcription, DNA-templated|response to retinoic acid|negative regulation of peroxisome proliferator activated receptor signaling pathway|monoubiquitinated histone H2A deubiquitination|negative regulation of fat cell differentiation|positive regulation of transcription from RNA polymerase II promoter|positive regulation of reti…	DNA binding|transcription coactivator activity|transcription corepressor activity|protein binding|retinoic acid receptor binding|peroxisome proliferator activated receptor binding|metal ion binding|	10	0	0	10	0.4	3.58	0.35	1.86	-0.22	1
ENSMUSG00000031604	SC4MOL	N/A	None	None	None	10	-0.87	2.32	10	-0.18	0.966	-0.24	1.86	-1.76	1.17
ENSMUSG00000032512	WDR48	WD repeat domain 48	nucleus|lysosome|intracellular membrane-bounded organelle|	viral process|protein deubiquitination|	protein binding|	10	0.36	2.52	10	0.07	0.0507	0.28	1.82	-0.38	1
ENSMUSG00000010057	NPRL2	nitrogen permease regulator-like 2 (S. cerevisiae)	None	protein phosphorylation|negative regulation of kinase activity|positive regulation of GTPase activity|	protein kinase activity|GTPase activator activity|protein binding|	10	-0.77	0.653	10	0.34	2.3	0.26	1.8	-1.38	1
ENSMUSG00000050043	TMX2	thioredoxin-related transmembrane protein 2	cellular_component|integral component of membrane|	biological_process|cell redox homeostasis|	molecular_function|	10	0.14	0.268	10	0.46	2.22	0.24	1.8	0	0.87
ENSMUSG00000031885	CBFB	core-binding factor, beta subunit	cellular_component|nucleus|membrane|	osteoblast differentiation|transcription from RNA polymerase II promoter|lymphocyte differentiation|myeloid cell differentiation|positive regulation of transcription from RNA polymerase II promoter|cell maturation|definitive hemopoiesis|	DNA binding|sequence-specific DNA binding transcription factor activity|transcription coactivator activity|protein binding|	10	-0.14	0.256	10	-0.3	1.7	-0.26	1.65	-0.98	0.61
ENSMUSG00000035762	TMEM161B	transmembrane protein 161B	integral component of membrane|	None	None	10	0.32	1.13	10	0.37	0.666	0.35	1.64	-0.6	0.99
ENSMUSG00000074794	ARRDC3	arrestin domain containing 3	endosome|plasma membrane|	temperature homeostasis|negative regulation of heat generation|negative regulation of multicellular organismal metabolic process|positive regulation of ubiquitin-protein transferase activity|fat pad development|positive regulation of adrenergic receptor signaling pathway|negative regulation of locomotion involved in locomotory behavior|	protein binding|beta-3 adrenergic receptor binding|	10	-0.22	0.0785	10	1.1	3.46	0.82	1.53	-0.3	2
ENSMUSG00000020368	CANX	calnexin	endoplasmic reticulum|endoplasmic reticulum lumen|endoplasmic reticulum membrane|ribosome|membrane|axon|dendrite cytoplasm|melanosome|neuronal cell body|dendritic spine|protein complex|extracellular vesicular exosome|integral component of lumenal side of endoplasmic reticulum membrane|	antigen processing and presentation of peptide antigen via MHC class I|protein folding|aging|protein secretion|protein N-linked glycosylation via asparagine|antigen processing and presentation of exogenous peptide antigen via MHC class II|post-translational protein modification|cellular protein metabolic process|synaptic vesicle endocytosis|chaperone-mediated protein folding|clathrin-mediated end…	glycoprotein binding|calcium ion binding|protein binding|apolipoprotein binding|ionotropic glutamate receptor binding|poly(A) RNA binding|unfolded protein binding|	10	0.2	0.0252	10	1.07	2.95	0.77	1.52	-0.3	1.94
ENSMUSG00000060073	PSMA3	proteasome (prosome, macropain) subunit, alpha type, 3	proteasome complex|nucleus|nucleus|nucleoplasm|cytoplasm|cytosol|proteasome core complex|proteasome core complex, alpha-subunit complex|extracellular vesicular exosome|	G1/S transition of mitotic cell cycle|protein polyubiquitination|mitotic cell cycle|antigen processing and presentation of peptide antigen via MHC class I|antigen processing and presentation of exogenous peptide antigen via MHC class I, TAP-dependent|regulation of cellular amino acid metabolic process|apoptotic process|DNA damage response, signal transduction by p53 class mediator resulting in ce…	threonine-type endopeptidase activity|protein binding|	10	0	0	10	0.4	2.44	0.2	1.45	0	0.81
ENSMUSG00000029772	AHCYL2	adenosylhomocysteinase-like 2	None	one-carbon metabolic process|	adenosylhomocysteinase activity|	10	-0.69	2.92	10	0.22	0.681	-0.37	1.42	-1	0.48
ENSMUSG00000026872	ZEB2	zinc finger E-box binding homeobox 2	nucleus|	negative regulation of transcription from RNA polymerase II promoter|neural crest cell migration|somitogenesis|neural tube closure|transcription, DNA-templated|nervous system development|hippocampus development|cell proliferation in forebrain|positive regulation of Wnt signaling pathway|positive regulation of JUN kinase activity|positive regulation of melanocyte differentiation|positive regulatio…	sequence-specific DNA binding transcription factor activity|phosphatase regulator activity|sequence-specific DNA binding|metal ion binding|R-SMAD binding|	10	0.15	0.2	10	0.21	1.34	0.19	1.41	0	0.79
ENSMUSG00000032412	ATP1B3	ATPase, Na+/K+ transporting, beta 3 polypeptide	plasma membrane|sodium:potassium-exchanging ATPase complex|caveola|melanosome|extracellular vesicular exosome|	transport|potassium ion transport|blood coagulation|ion transmembrane transport|sodium ion transmembrane transport|sodium ion transmembrane transport|leukocyte migration|transmembrane transport|	sodium:potassium-exchanging ATPase activity|	10	0.3	1.36	10	0.61	0.554	0.33	1.35	-0.45	1.74
ENSMUSG00000017221	PSMD3	proteasome (prosome, macropain) 26S subunit, non-ATPase, 3	proteasome complex|nucleus|nucleoplasm|cytoplasm|cytosol|membrane|proteasome accessory complex|extracellular vesicular exosome|	G1/S transition of mitotic cell cycle|protein polyubiquitination|mitotic cell cycle|antigen processing and presentation of peptide antigen via MHC class I|antigen processing and presentation of exogenous peptide antigen via MHC class I, TAP-dependent|regulation of cellular amino acid metabolic process|apoptotic process|DNA damage response, signal transduction by p53 class mediator resulting in ce…	enzyme regulator activity|	10	0.27	0.93	10	0.22	0.534	0.24	1.33	-0.62	0.92
ENSMUSG00000068749	PSMA5	proteasome (prosome, macropain) subunit, alpha type, 5	proteasome complex|nucleus|nucleoplasm|cytoplasm|cytosol|proteasome core complex|proteasome core complex, alpha-subunit complex|extracellular vesicular exosome|	G1/S transition of mitotic cell cycle|protein polyubiquitination|mitotic cell cycle|antigen processing and presentation of peptide antigen via MHC class I|antigen processing and presentation of exogenous peptide antigen via MHC class I, TAP-dependent|regulation of cellular amino acid metabolic process|apoptotic process|DNA damage response, signal transduction by p53 class mediator resulting in ce…	threonine-type endopeptidase activity|protein binding|	10	0.89	3.2	10	0	0	0.23	1.29	-0.33	1.93
ENSMUSG00000030603	PSMC4	proteasome (prosome, macropain) 26S subunit, ATPase, 4	proteasome complex|nucleus|nucleoplasm|cytoplasm|cytosol|membrane|inclusion body|proteasome accessory complex|cytosolic proteasome complex|	G1/S transition of mitotic cell cycle|protein polyubiquitination|mitotic cell cycle|blastocyst development|antigen processing and presentation of peptide antigen via MHC class I|antigen processing and presentation of exogenous peptide antigen via MHC class I, TAP-dependent|ATP catabolic process|proteolysis|regulation of cellular amino acid metabolic process|apoptotic process|DNA damage response, …	protein binding|ATP binding|ATPase activity|	10	0.1	0.132	10	0.23	1.28	0.23	1.25	0	1.4
ENSMUSG00000030917	TMEM159	transmembrane protein 159	integral component of membrane|	None	None	10	-1.44	0.473	10	-0.35	1.65	-0.41	1.24	-2.39	0.69
ENSMUSG00000026457	ADIPOR1	adiponectin receptor 1	plasma membrane|membrane|integral component of membrane|	hormone-mediated signaling pathway|fatty acid oxidation|negative regulation of cell growth|leptin-mediated signaling pathway|adiponectin-activated signaling pathway|positive regulation of JAK-STAT cascade|positive regulation of insulin receptor signaling pathway|	receptor activity|protein kinase binding|hormone binding|identical protein binding|protein heterodimerization activity|	10	0.57	1.59	10	0.19	0.646	0.44	1.21	-1.53	1.63
ENSMUSG00000028334	NANS	N-acetylneuraminic acid synthase	cytoplasm|cytosol|extracellular vesicular exosome|	lipopolysaccharide biosynthetic process|	N-acylneuraminate cytidylyltransferase activity|N-acylneuraminate-9-phosphate synthase activity|N-acetylneuraminate synthase activity|	10	0.33	1.02	10	0.15	0.391	0.3	1.19	-0.5	1
ENSMUSG00000072582	PTRH2	peptidyl-tRNA hydrolase 2	mitochondrion|mitochondrion|cytosol|membrane|	apoptotic process|metabolic process|negative regulation of gene expression|positive regulation of anoikis|negative regulation of anoikis|	aminoacyl-tRNA hydrolase activity|protein binding|	10	0.49	0.561	10	0.34	0.816	0.36	1.17	-0.82	1.47
ENSMUSG00000028792	AK2	adenylate kinase 2	mitochondrial inner membrane|mitochondrial intermembrane space|cytosol|extracellular vesicular exosome|sperm mitochondrial sheath|	liver development|oxidative phosphorylation|ADP biosynthetic process|brain development|nucleobase-containing small molecule interconversion|small molecule metabolic process|AMP metabolic process|dATP metabolic process|nucleotide phosphorylation|nucleotide phosphorylation|nucleobase-containing small molecule metabolic process|response to thyroid hormone|	adenylate kinase activity|ATP binding|	10	-0.68	2.84	10	0.38	0.405	-0.29	1.15	-1	0.67
ENSMUSG00000028479	GNE	glucosamine (UDP-N-acetyl)-2-epimerase/N-acetylmannosamine kinase	cytoplasm|cytosol|	N-acetylglucosamine biosynthetic process|UDP-N-acetylglucosamine metabolic process|N-acetylneuraminate metabolic process|cell adhesion|lipopolysaccharide biosynthetic process|N-acetylneuraminate biosynthetic process|carbohydrate phosphorylation|carbohydrate phosphorylation|	ATP binding|UDP-N-acetylglucosamine 2-epimerase activity|N-acylmannosamine kinase activity|hydrolase activity|metal ion binding|	10	0.23	0.936	10	0.14	0.338	0.19	1.11	-0.56	0.96
ENSMUSG00000036835	PSENEN	presenilin enhancer gamma secretase subunit	endoplasmic reticulum|endoplasmic reticulum membrane|Golgi apparatus|plasma membrane|integral component of plasma membrane|Golgi cisterna membrane|	membrane protein ectodomain proteolysis|Notch signaling pathway|Notch receptor processing|protein processing|membrane protein intracellular domain proteolysis|amyloid precursor protein catabolic process|positive regulation of apoptotic process|positive regulation of catalytic activity|neurotrophin TRK receptor signaling pathway|apoptotic signaling pathway|	protein binding|	10	-0.29	1.03	10	0.3	1.68	0.24	1.11	-0.74	0.91
ENSMUSG00000034652	CD300A	CD300a molecule	plasma membrane|membrane|integral component of membrane|extracellular vesicular exosome|	immune system process|cell adhesion|signal transduction|negative regulation of B cell proliferation|positive regulation of phosphoprotein phosphatase activity|negative regulation of mast cell activation involved in immune response|negative regulation of mast cell degranulation|negative regulation of MAP kinase activity|negative regulation of fibroblast proliferation|regulation of T cell receptor …	phosphatidylserine binding|protein binding|phosphatidylethanolamine binding|signaling receptor activity|	10	0.34	0.749	10	0.19	0.468	0.29	1.08	-3.19	1
ENSMUSG00000003948	MMD	monocyte to macrophage differentiation-associated	lysosomal membrane|integral component of plasma membrane|membrane|late endosome membrane|	cytolysis|	receptor activity|	10	0.66	1.54	10	0.15	0.0676	0.22	1.05	-0.6	1.68
ENSMUSG00000017428	PSMD11	proteasome (prosome, macropain) 26S subunit, non-ATPase, 11	proteasome complex|nucleus|nucleoplasm|cytosol|membrane|proteasome accessory complex|extracellular vesicular exosome|	G1/S transition of mitotic cell cycle|protein polyubiquitination|mitotic cell cycle|antigen processing and presentation of peptide antigen via MHC class I|antigen processing and presentation of exogenous peptide antigen via MHC class I, TAP-dependent|ubiquitin-dependent protein catabolic process|regulation of cellular amino acid metabolic process|apoptotic process|DNA damage response, signal tran…	protein binding|	10	0.12	0.147	10	0.28	1.17	0.21	1.04	-1.09	1
ENSMUSG00000020708	PSMC5	proteasome (prosome, macropain) 26S subunit, ATPase, 5	proteasome complex|nucleus|nucleoplasm|cytoplasm|cytosol|membrane|inclusion body|proteasome accessory complex|cytoplasmic vesicle|nuclear proteasome complex|cytosolic proteasome complex|extracellular vesicular exosome|blood microparticle|	G1/S transition of mitotic cell cycle|protein polyubiquitination|mitotic cell cycle|antigen processing and presentation of peptide antigen via MHC class I|antigen processing and presentation of exogenous peptide antigen via MHC class I, TAP-dependent|ATP catabolic process|transcription from RNA polymerase II promoter|regulation of cellular amino acid metabolic process|apoptotic process|DNA damage…	transcription cofactor activity|protein binding|ATP binding|transcription factor binding|ATPase activity|ATPase activity|TBP-class protein binding|thyrotropin-releasing hormone receptor binding|	10	0.32	1.9	10	0	0	0.22	1	0	0.81
ENSMUSG00000029687	EZH2	enhancer of zeste 2 polycomb repressive complex 2 subunit	nuclear chromatin|nucleus|nucleoplasm|cytoplasm|ESC/E(Z) complex|pronucleus|	negative regulation of transcription from RNA polymerase II promoter|chromatin organization|transcription, DNA-templated|regulation of transcription, DNA-templated|positive regulation of epithelial to mesenchymal transition|regulation of gliogenesis|cerebellar cortex development|positive regulation of Ras GTPase activity|negative regulation of transcription elongation from RNA polymerase II promo…	core promoter binding|DNA binding|chromatin binding|RNA binding|protein binding|chromatin DNA binding|histone methyltransferase activity|sequence-specific DNA binding|histone methyltransferase activity (H3-K27 specific)|	10	0	0	10	0.24	1.49	0.2	0.998	0	1.38
ENSMUSG00000037894	H2AFZ	H2A histone family, member Z	nucleosome|nucleus|nuclear euchromatin|nuclear heterochromatin|	nucleosome assembly|positive regulation of transcription from RNA polymerase II promoter|cellular response to estradiol stimulus|	RNA polymerase II core promoter proximal region sequence-specific DNA binding|RNA polymerase II core promoter sequence-specific DNA binding|RNA polymerase II distal enhancer sequence-specific DNA binding|protein binding|chromatin DNA binding|nucleosomal DNA binding|protein heterodimerization activity|	10	-1.41	4.36	10	0.1	0.13	-1.39	0.989	-2.9	0.53
ENSMUSG00000053754	CHD8	chromodomain helicase DNA binding protein 8	nucleus|protein complex|MLL1 complex|	in utero embryonic development|ATP catabolic process|transcription, DNA-templated|negative regulation of Wnt signaling pathway|DNA duplex unwinding|ATP-dependent chromatin remodeling|negative regulation of transcription, DNA-templated|positive regulation of transcription, DNA-templated|positive regulation of transcription from RNA polymerase II promoter|positive regulation of transcription from R…	p53 binding|DNA binding|DNA helicase activity|protein binding|ATP binding|beta-catenin binding|DNA-dependent ATPase activity|methylated histone binding|histone binding|armadillo repeat domain binding|	10	0.11	0.207	10	0.24	0.98	0.19	0.976	-0.43	0.99
ENSMUSG00000026792	LRSAM1	leucine rich repeat and sterile alpha motif containing 1	extracellular region|cytoplasm|membrane|	protein polyubiquitination|cell death|protein catabolic process|negative regulation of endocytosis|viral budding|protein autoubiquitination|ubiquitin-dependent endocytosis|	ubiquitin-protein transferase activity|hormone activity|protein binding|zinc ion binding|ligase activity|	10	-0.21	0.251	10	-1.03	2.58	-0.17	0.942	-1.98	0.28
ENSMUSG00000022387	BRD1	bromodomain containing 1	nucleus|nucleus|MOZ/MORF histone acetyltransferase complex|	histone H3 acetylation|	zinc ion binding|histone binding|	10	0.14	0.276	10	0.17	0.719	0.16	0.908	-0.58	0.93
ENSMUSG00000029434	VPS33A	vacuolar protein sorting 33 homolog A (S. cerevisiae)	lysosomal membrane|early endosome|late endosome|HOPS complex|late endosome membrane|perinuclear region of cytoplasm|	vesicle docking involved in exocytosis|protein transport|vesicle-mediated transport|platelet formation|melanosome localization|lysosome localization|regulation of developmental pigmentation|	protein binding|	10	0.33	1.99	10	0	0	0.21	0.867	0	0.82
ENSMUSG00000029640	USP12	ubiquitin specific peptidase 12	cellular_component|	ubiquitin-dependent protein catabolic process|protein deubiquitination|	cysteine-type endopeptidase activity|ubiquitin thiolesterase activity|ubiquitin thiolesterase activity|ubiquitin-specific protease activity|protein binding|	10	-0.03	0.0111	10	0.27	1.4	0.25	0.84	-0.51	1
ENSMUSG00000074698	CSNK2A1	casein kinase 2, alpha 1 polypeptide	nucleus|cytosol|plasma membrane|Sin3 complex|NuRD complex|PcG protein complex|	mitotic cell cycle|transcription, DNA-templated|regulation of transcription, DNA-templated|protein phosphorylation|signal transduction|axon guidance|positive regulation of cell proliferation|Wnt signaling pathway|positive regulation of Wnt signaling pathway|positive regulation of cell growth|negative regulation of cysteine-type endopeptidase activity involved in apoptotic process|positive regulat…	protein serine/threonine kinase activity|protein serine/threonine kinase activity|protein binding|ATP binding|protein N-terminus binding|Hsp90 protein binding|	10	0.04	0.0212	10	-0.32	2.06	-0.28	0.807	-0.84	0.75
ENSMUSG00000001441	NPEPPS	aminopeptidase puromycin sensitive	nucleus|cytosol|extracellular vesicular exosome|	protein polyubiquitination|antigen processing and presentation of peptide antigen via MHC class I|proteolysis|cellular response to hypoxia|	aminopeptidase activity|metallopeptidase activity|zinc ion binding|	10	0.35	0.647	10	0.15	0.531	0.2	0.804	0	0.83
ENSMUSG00000070934	RRAGA	Ras-related GTP binding A	nucleus|cytoplasm|lysosome|lysosomal membrane|Golgi apparatus|intracellular membrane-bounded organelle|	apoptotic process|cell death|modulation by virus of host morphology or physiology|positive regulation of TOR signaling|cellular protein localization|positive regulation of cytolysis|cellular response to amino acid stimulus|	protein binding|GTP binding|protein homodimerization activity|protein heterodimerization activity|phosphoprotein binding|	10	0.72	2.49	10	-1.36	2.83	0.24	0.777	-2.78	1.55
ENSMUSG00000022811	ZFP148	zinc finger protein 148	nucleus|nucleus|	negative regulation of transcription from RNA polymerase II promoter|transcription, DNA-templated|regulation of transcription, DNA-templated|protein complex assembly|gamete generation|negative regulation of gene expression|negative regulation of transcription, DNA-templated|positive regulation of transcription from RNA polymerase II promoter|	transcription regulatory region sequence-specific DNA binding|nucleic acid binding|DNA binding|double-stranded DNA binding|sequence-specific DNA binding transcription factor activity|sequence-specific DNA binding|metal ion binding|	10	0	0	10	-0.29	1.29	-0.24	0.768	-0.99	0.54
ENSMUSG00000064145	ARIH2	ariadne RBR E3 ubiquitin protein ligase 2	nucleus|cytoplasm|	protein polyubiquitination|multicellular organismal development|protein ubiquitination involved in ubiquitin-dependent protein catabolic process|developmental cell growth|protein K63-linked ubiquitination|protein K48-linked ubiquitination|hematopoietic stem cell proliferation|	nucleic acid binding|ubiquitin-protein transferase activity|protein binding|zinc ion binding|ligase activity|	10	0.06	0.0426	10	0.27	1.06	0.19	0.764	-0.96	0.74
ENSMUSG00000022952	RUNX1	runt-related transcription factor 1	basement membrane|nucleus|nucleus|	skeletal system development|in utero embryonic development|liver development|myeloid progenitor cell differentiation|transcription, DNA-templated|central nervous system development|regulation of signal transduction|hemopoiesis|hemopoiesis|myeloid cell differentiation|negative regulation of granulocyte differentiation|positive regulation of granulocyte differentiation|hair follicle morphogenesis|e…	regulatory region DNA binding|DNA binding|sequence-specific DNA binding transcription factor activity|sequence-specific DNA binding transcription factor activity|calcium ion binding|protein binding|ATP binding|transcription factor binding|protein homodimerization activity|protein heterodimerization activity|repressing transcription factor binding|	10	0.32	1.79	10	-0.22	1.04	-0.19	0.752	-0.81	0.8
ENSMUSG00000041235	CHD7	chromodomain helicase DNA binding protein 7	nucleus|nucleus|	skeletal system development|in utero embryonic development|heart morphogenesis|transcription, DNA-templated|regulation of transcription, DNA-templated|rRNA processing|central nervous system development|adult heart development|sensory perception of sound|adult walking behavior|blood circulation|chromatin modification|cranial nerve development|T cell differentiation|female genitalia development|emb…	DNA binding|chromatin binding|helicase activity|protein binding|ATP binding|	10	-0.1	0.0911	10	-0.33	1.05	-0.24	0.724	-0.81	0
ENSMUSG00000027411	VPS16	vacuolar protein sorting 16 homolog (S. cerevisiae)	lysosomal membrane|early endosome|late endosome|actin filament|axon|HOPS complex|late endosome membrane|neuronal cell body|recycling endosome|	intracellular protein transport|	actin filament binding|	10	0.05	0.0367	10	0.19	0.883	0.14	0.704	-0.62	0.97
ENSMUSG00000023170	GPS2	G protein pathway suppressor 2	nucleus|transcriptional repressor complex|	negative regulation of transcription from RNA polymerase II promoter|inactivation of MAPK activity|cell cycle|JNK cascade|negative regulation of JNK cascade|	transcription corepressor activity|GTPase inhibitor activity|protein binding|	10	-0.29	0.031	10	0.3	1.69	0.22	0.683	-0.67	0.96
ENSMUSG00000025027	XPNPEP1	X-prolyl aminopeptidase (aminopeptidase P) 1, soluble	cytoplasm|cytoplasm|cytosol|extracellular vesicular exosome|	proteolysis|bradykinin catabolic process|	aminopeptidase activity|manganese ion binding|protein homodimerization activity|metalloaminopeptidase activity|	10	0.44	0.155	10	-0.17	1.19	-0.13	0.674	-0.75	0.88
ENSMUSG00000054871	TMEM158	transmembrane protein 158 (gene/pseudogene)	integral component of membrane|	None	peptide binding|	10	-0.86	2.33	10	-0.15	0.272	-0.31	0.657	-1.94	0.28
ENSMUSG00000027641	RBL1	retinoblastoma-like 1	nucleus|nucleoplasm|transcription factor complex|	negative regulation of transcription from RNA polymerase II promoter|mitotic cell cycle|transcription, DNA-templated|transcription initiation from RNA polymerase II promoter|transforming growth factor beta receptor signaling pathway|gene expression|viral process|chromatin modification|regulation of lipid kinase activity|positive regulation of transcription from RNA polymerase II promoter|regulati…	protein binding|transcription factor binding|	10	0.18	0.357	10	0.18	0.324	0.18	0.623	-0.58	0.96
ENSMUSG00000063804	LIN28B	lin-28 homolog B (C. elegans)	nucleus|cytoplasm|	regulation of transcription, DNA-templated|miRNA catabolic process|pre-miRNA processing|RNA 3'-end processing|	DNA binding|RNA binding|protein binding|zinc ion binding|poly(A) RNA binding|	10	0.44	0.7	10	0.15	0.262	0.23	0.621	-0.51	1
ENSMUSG00000042348	ARL15	ADP-ribosylation factor-like 15	intracellular|extracellular vesicular exosome|	small GTPase mediated signal transduction|biological_process|	molecular_function|GTP binding|	10	0	0	10	-0.19	0.816	-0.17	0.605	-0.83	0
ENSMUSG00000031156	SLC35A2	solute carrier family 35 (UDP-galactose transporter), member A2	Golgi membrane|nucleus|Golgi apparatus|integral component of membrane|	galactose metabolic process|UDP-galactose transport|proton transport|transmembrane transport|UDP-galactose transmembrane transport|	sugar:proton symporter activity|UDP-galactose transmembrane transporter activity|protein binding|	10	0.15	0.193	10	0.3	0.516	0.21	0.576	0	0.85
ENSMUSG00000009741	UBP1	upstream binding protein 1 (LBP-1a)	nucleus|	angiogenesis|transcription, DNA-templated|regulation of transcription from RNA polymerase II promoter|viral genome replication|negative regulation of transcription, DNA-templated|	DNA binding|sequence-specific DNA binding transcription factor activity|transcription corepressor activity|	10	-0.53	0.964	10	-0.11	0.34	-0.15	0.541	-1.52	0.82
ENSMUSG00000025485	RIC8	resistance to inhibitors of cholinesterase 8 homolog (C. elegans)	cytoplasm|cytosol|plasma membrane|membrane|	in utero embryonic development|vasculature development|adenylate cyclase-inhibiting G-protein coupled receptor signaling pathway|gastrulation|regulation of G-protein coupled receptor protein signaling pathway|visual learning|response to light stimulus|cell migration involved in gastrulation|positive regulation of GTPase activity|cell-cell adhesion involved in gastrulation|basement membrane organi…	G-protein alpha-subunit binding|guanyl-nucleotide exchange factor activity|GTPase activator activity|protein binding|	10	-0.62	0.726	10	0.13	0.16	0.2	0.536	-1.44	1
ENSMUSG00000024477	PGGT1B	protein geranylgeranyltransferase type I, beta subunit	CAAX-protein geranylgeranyltransferase complex|	positive regulation of cell proliferation|protein geranylgeranylation|response to cytokine|positive regulation of cell cycle|negative regulation of nitric-oxide synthase biosynthetic process|	protein geranylgeranyltransferase activity|CAAX-protein geranylgeranyltransferase activity|zinc ion binding|	10	0	0	10	-0.37	1.7	-0.23	0.527	-1	0.66
ENSMUSG00000034021	PDS5B	PDS5, regulator of cohesion maintenance, homolog B (S. cerevisiae)	chromosome, centromeric region|chromatin|nucleus|nucleus|nucleoplasm|chromosome|cytosol|	mitotic cell cycle|mitotic sister chromatid cohesion|cell proliferation|negative regulation of cell proliferation|regulation of cell proliferation|	DNA binding|protein binding|ATP binding|	10	0.5	1.32	10	0	0	0.14	0.52	-0.69	1.59
ENSMUSG00000014498	ANKRD52	ankyrin repeat domain 52	None	None	protein binding|	10	0	0	10	0.3	1.6	0.24	0.514	-0.49	1
ENSMUSG00000029328	HNRNPDL	heterogeneous nuclear ribonucleoprotein D-like	nucleus|spliceosomal complex|cytoplasm|extracellular vesicular exosome|	transcription, DNA-templated|regulation of transcription, DNA-templated|RNA processing|regulation of gene expression|	nucleotide binding|DNA binding|double-stranded DNA binding|single-stranded DNA binding|poly(A) binding|poly(G) binding|poly(A) RNA binding|	10	-0.46	2.67	10	0	0	-0.36	0.513	-0.9	0
ENSMUSG00000004099	DNMT1	DNA (cytosine-5-)-methyltransferase 1	nucleus|replication fork|centromeric heterochromatin|	negative regulation of transcription from RNA polymerase II promoter|DNA methylation|transcription, DNA-templated|maintenance of DNA methylation|positive regulation of gene expression|gene silencing|chromatin modification|regulation of cell proliferation|positive regulation of histone H3-K4 methylation|negative regulation of histone H3-K9 methylation|cellular response to amino acid stimulus|C-5 m…	DNA binding|chromatin binding|RNA binding|DNA (cytosine-5-)-methyltransferase activity|protein binding|transcription factor binding|zinc ion binding|methyl-CpG binding|DNA-methyltransferase activity|	10	0.04	0.0181	10	0.15	0.632	0.12	0.498	-0.67	0.89
ENSMUSG00000035596	MBOAT7	membrane bound O-acyltransferase domain containing 7	endoplasmic reticulum membrane|membrane|integral component of membrane|	phospholipid metabolic process|ventricular system development|phosphatidylinositol acyl-chain remodeling|small molecule metabolic process|glycerophospholipid biosynthetic process|	protein binding|transferase activity, transferring acyl groups other than amino-acyl groups|	10	0.2	0.724	10	0.02	0.00304	0.14	0.495	0	0.79
ENSMUSG00000035203	EPN1	epsin 1	nucleus|cytoplasm|plasma membrane|coated pit|	in utero embryonic development|endocytosis|epidermal growth factor receptor signaling pathway|Notch signaling pathway|female pregnancy|negative regulation of epidermal growth factor receptor signaling pathway|embryonic organ development|	transcription factor binding|lipid binding|	10	-0.13	0.0276	10	0.22	0.774	0.15	0.474	-0.79	0.87
ENSMUSG00000023243	KCNK5	potassium channel, subfamily K, member 5	integral component of plasma membrane|	potassium ion transport|excretion|regulation of ion transmembrane transport|potassium ion transmembrane transport|	voltage-gated ion channel activity|potassium channel activity|	10	-0.02	0.00326	10	0.19	0.513	0.18	0.46	-1.23	1
ENSMUSG00000040648	PPIP5K2	diphosphoinositol pentakisphosphate kinase 2	cytosol|cytosol|	inositol metabolic process|phosphorylation|dephosphorylation|inositol phosphate metabolic process|small molecule metabolic process|	inositol-1,3,4,5,6-pentakisphosphate kinase activity|inositol hexakisphosphate 5-kinase activity|acid phosphatase activity|ATP binding|diphosphoinositol-pentakisphosphate kinase activity|inositol hexakisphosphate 1-kinase activity|inositol hexakisphosphate 3-kinase activity|	10	-0.33	1.35	10	0.07	0.0798	-0.28	0.451	-1	0.59
ENSMUSG00000040865	INO80D	INO80 complex subunit D	nucleus|	DNA repair|DNA recombination|transcription, DNA-templated|regulation of transcription, DNA-templated|	None	10	0.25	0.968	10	-0.22	0.616	0.18	0.438	-0.69	0.91
ENSMUSG00000042079	HNRNPF	heterogeneous nuclear ribonucleoprotein F	nucleus|nucleoplasm|membrane|catalytic step 2 spliceosome|	mRNA splicing, via spliceosome|mRNA splicing, via spliceosome|RNA processing|RNA splicing|gene expression|regulation of RNA splicing|regulation of RNA splicing|	nucleotide binding|RNA binding|single-stranded RNA binding|protein binding|poly(A) RNA binding|	10	0.29	0.863	10	0.04	0.0315	0.17	0.43	-0.54	0.98
ENSMUSG00000006335	TFPT	TCF3 (E2A) fusion partner (in childhood Leukemia)	nucleus|nucleus|nucleolus|cytoplasm|actin filament|Ino80 complex|	DNA repair|DNA recombination|transcription, DNA-templated|regulation of transcription, DNA-templated|positive regulation of apoptotic process|apoptotic signaling pathway|	DNA binding|protein binding|protein kinase binding|protein heterodimerization activity|	10	0.12	0.144	10	0.14	0.318	0.13	0.42	0	1.5
ENSMUSG00000030591	PSMD8	proteasome (prosome, macropain) 26S subunit, non-ATPase, 8	proteasome complex|nucleus|nucleoplasm|cytosol|proteasome regulatory particle|proteasome accessory complex|extracellular vesicular exosome|	G1/S transition of mitotic cell cycle|protein polyubiquitination|mitotic cell cycle|antigen processing and presentation of peptide antigen via MHC class I|antigen processing and presentation of exogenous peptide antigen via MHC class I, TAP-dependent|regulation of cellular amino acid metabolic process|apoptotic process|DNA damage response, signal transduction by p53 class mediator resulting in ce…	None	10	0.25	1.23	10	0	0	0.14	0.419	0	0.79
ENSMUSG00000059355	BC056474	N/A	None	None	None	10	-0.44	1.84	10	0	0	-0.37	0.413	-1	0.45
ENSMUSG00000001098	KCTD10	potassium channel tetramerization domain containing 10	nucleus|cytoplasm|Cul3-RING ubiquitin ligase complex|TCTN-B9D complex|	protein ubiquitination|protein ubiquitination|proteasome-mediated ubiquitin-dependent protein catabolic process|protein homooligomerization|	ubiquitin-protein transferase activity|	10	-1.58	0.317	10	-0.11	0.328	-0.09	0.403	-2.56	0.9
ENSMUSG00000020346	MGAT1	mannosyl (alpha-1,3-)-glycoprotein beta-1,2-N-acetylglucosaminyltransferase	Golgi membrane|membrane|integral component of membrane|extracellular vesicular exosome|	in utero embryonic development|carbohydrate metabolic process|UDP-N-acetylglucosamine catabolic process|protein glycosylation|protein N-linked glycosylation via asparagine|post-translational protein modification|cellular protein metabolic process|	alpha-1,3-mannosylglycoprotein 2-beta-N-acetylglucosaminyltransferase activity|acetylglucosaminyltransferase activity|metal ion binding|	10	0.19	0.442	10	0.08	0.0725	0.15	0.402	0	0.8
ENSMUSG00000028333	ANP32B	acidic (leucine-rich) nuclear phosphoprotein 32 family, member B	nucleus|nucleolus|cytoplasm|extracellular vesicular exosome|	nucleosome assembly|activation of cysteine-type endopeptidase activity involved in apoptotic process|negative regulation of cell differentiation|positive regulation of protein export from nucleus|	histone binding|RNA polymerase binding|	10	-0.5	0.813	10	0.24	1.11	0.17	0.397	-1	0.61
ENSMUSG00000043998	MGAT2	mannosyl (alpha-1,6-)-glycoprotein beta-1,2-N-acetylglucosaminyltransferase	Golgi membrane|Golgi stack|membrane|integral component of membrane|	protein N-linked glycosylation|oligosaccharide metabolic process|oligosaccharide biosynthetic process|protein N-linked glycosylation via asparagine|post-translational protein modification|cellular protein metabolic process|	alpha-1,6-mannosylglycoprotein 2-beta-N-acetylglucosaminyltransferase activity|carbohydrate binding|	10	0.24	0.795	10	0.02	0.00928	0.15	0.39	-0.57	0.95
ENSMUSG00000002496	TSC2	tuberous sclerosis 2	nucleus|cytoplasm|cytoplasm|Golgi apparatus|cytosol|cytosol|caveola|membrane|dendrite|growth cone|TSC1-TSC2 complex|neuronal cell body|perinuclear region of cytoplasm|	response to hypoxia|neural tube closure|negative regulation of protein kinase activity|protein import into nucleus|endocytosis|acute-phase response|cell cycle arrest|epidermal growth factor receptor signaling pathway|heart development|protein localization|negative regulation of cell proliferation|insulin receptor signaling pathway|fibroblast growth factor receptor signaling pathway|phosphatidylin…	GTPase activator activity|protein binding|phosphatase binding|protein homodimerization activity|protein heterodimerization activity|14-3-3 protein binding|	10	-0.41	0.308	10	0.22	0.819	0.15	0.346	-1.26	1
ENSMUSG00000030286	EMC3	ER membrane protein complex subunit 3	integral component of membrane|ER membrane protein complex|	biological_process|	molecular_function|	10	0.31	0.848	10	0.04	0.0141	0.13	0.34	-0.56	0.97
ENSMUSG00000020166	CNOT2	CCR4-NOT transcription complex, subunit 2	nucleus|cytoplasm|cytosol|membrane|CCR4-NOT complex|	negative regulation of transcription from RNA polymerase II promoter|nuclear-transcribed mRNA catabolic process, deadenylation-dependent decay|nuclear-transcribed mRNA poly(A) tail shortening|trophectodermal cell differentiation|regulation of transcription from RNA polymerase II promoter|transcription from RNA polymerase II promoter|regulation of translation|gene expression|positive regulation of…	RNA polymerase II transcription cofactor activity|RNA polymerase II transcription corepressor binding|poly(A)-specific ribonuclease activity|protein binding|	10	0.51	1.75	10	-0.06	0.0196	-0.13	0.332	-0.99	1.33
ENSMUSG00000069769	MSI2	musashi RNA-binding protein 2	cytoplasm|polysome|	stem cell development|	nucleotide binding|poly(U) RNA binding|poly(A) RNA binding|	10	0	0	10	0.16	0.526	0.12	0.319	-0.52	1
ENSMUSG00000033809	ALG3	ALG3, alpha-1,3- mannosyltransferase	endoplasmic reticulum membrane|endoplasmic reticulum membrane|integral component of membrane|	protein glycosylation|dolichol-linked oligosaccharide biosynthetic process|protein N-linked glycosylation via asparagine|post-translational protein modification|cellular protein metabolic process|mannosylation|mannosylation|	alpha-1,3-mannosyltransferase activity|dol-P-Man:Man(5)GlcNAc(2)-PP-Dol alpha-1,3-mannosyltransferase activity|	10	0.2	0.273	10	0.09	0.111	0.12	0.273	0	0.8
ENSMUSG00000059495	ARHGEF12	Rho guanine nucleotide exchange factor (GEF) 12	cytoplasm|cytosol|membrane|extracellular vesicular exosome|	G-protein coupled receptor signaling pathway|small GTPase mediated signal transduction|axon guidance|positive regulation of Rho GTPase activity|termination of G-protein coupled receptor signaling pathway|positive regulation of apoptotic process|neurotrophin TRK receptor signaling pathway|regulation of small GTPase mediated signal transduction|apoptotic signaling pathway|	G-protein coupled receptor binding|Rho guanyl-nucleotide exchange factor activity|GTPase activator activity|protein binding|	10	0.18	0.179	10	0.12	0.106	0.14	0.243	-0.52	0.99
ENSMUSG00000041236	VPS41	vacuolar protein sorting 41 homolog (S. cerevisiae)	lysosomal membrane|early endosome|late endosome|Golgi-associated vesicle|cytosol|microtubule|membrane|HOPS complex|	intracellular protein transport|biological_process|vesicle-mediated transport|Golgi vesicle transport|	molecular_function|protein binding|microtubule binding|zinc ion binding|	10	0.25	0.723	10	-0.03	0.0263	0.12	0.233	-0.76	0.87
ENSMUSG00000032806	SLC10A3	solute carrier family 10, member 3	integral component of membrane|	sodium ion transport|bile acid and bile salt transport|response to retinoic acid|transmembrane transport|	bile acid:sodium symporter activity|	10	0.2	0.331	10	0.05	0.0553	0.11	0.232	-0.73	0.88
ENSMUSG00000029617	CCZ1	CCZ1 vacuolar protein trafficking and biogenesis associated homolog (S. cerevisiae)	lysosomal membrane|	None	None	10	-0.25	0.21	10	0.13	0.243	0.11	0.218	-0.97	0.68
ENSMUSG00000004612	NKG7	natural killer cell granule protein 7	integral component of plasma membrane|	None	None	10	-0.11	0.134	10	-0.31	0.183	-0.14	0.211	-0.85	0.8
ENSMUSG00000075703	EPT1	ethanolaminephosphotransferase 1 (CDP-ethanolamine-specific)	endoplasmic reticulum membrane|integral component of membrane|	phospholipid metabolic process|phosphatidylethanolamine biosynthetic process|phosphatidylethanolamine biosynthetic process|small molecule metabolic process|glycerophospholipid biosynthetic process|	ethanolaminephosphotransferase activity|metal ion binding|	10	0.32	0.97	10	0	0	0.21	0.21	-0.5	1
ENSMUSG00000028671	GALE	UDP-galactose-4-epimerase	cytosol|extracellular vesicular exosome|	carbohydrate metabolic process|galactose catabolic process|galactose catabolic process|cellular metabolic process|small molecule metabolic process|	UDP-glucose 4-epimerase activity|UDP-glucose 4-epimerase activity|protein homodimerization activity|coenzyme binding|	10	0	0	10	0.2	0.593	0.12	0.2	-0.62	0.94
ENSMUSG00000042590	IPO11	importin 11	nucleus|cytoplasm|	ribosomal protein import into nucleus|	Ran GTPase binding|protein transporter activity|	10	0	0	10	0.14	0.429	0.1	0.188	0	1.52
ENSMUSG00000022337	EMC2	ER membrane protein complex subunit 2	nucleus|cytoplasm|mitochondrion|endoplasmic reticulum|ER membrane protein complex|	None	None	10	-0.1	0.134	10	-0.35	0.209	-0.39	0.187	-1.56	0.76
ENSMUSG00000038369	NCOA6	nuclear receptor coactivator 6	nucleus|nucleus|nucleoplasm|transcription factor complex|histone methyltransferase complex|intracellular membrane-bounded organelle|	DNA replication|DNA repair|DNA recombination|DNA-templated transcription, initiation|transcription initiation from RNA polymerase II promoter|cellular response to DNA damage stimulus|brain development|heart development|response to hormone|myeloid cell differentiation|intracellular estrogen receptor signaling pathway|glucocorticoid receptor signaling pathway|cellular lipid metabolic process|small …	chromatin binding|transcription coactivator activity|protein binding|enzyme binding|estrogen receptor binding|ligand-dependent nuclear receptor transcription coactivator activity|retinoid X receptor binding|thyroid hormone receptor binding|	10	0.44	1.34	10	0.02	0.00504	0.13	0.17	-0.45	1
ENSMUSG00000021733	SLC4A7	solute carrier family 4, sodium bicarbonate cotransporter, member 7	plasma membrane|integral component of membrane|basolateral plasma membrane|apical plasma membrane|stereocilium|	ion transport|bicarbonate transport|bicarbonate transport|cochlear nucleus development|sodium ion transmembrane transport|retinal cell programmed cell death|transmembrane transport|auditory receptor cell development|retina vasculature morphogenesis in camera-type eye|	inorganic anion exchanger activity|sodium:bicarbonate symporter activity|	10	-0.06	0.0291	10	-0.08	0.153	-0.07	0.165	-0.78	0
ENSMUSG00000039840	EPG5	ectopic P-granules autophagy protein 5 homolog (C. elegans)	None	autophagy|	None	10	0.24	0.88	10	0	0	0.09	0.154	-1.78	0.75
ENSMUSG00000035992	FNIP1	folliculin interacting protein 1	cytoplasm|	negative regulation of transcription from RNA polymerase II promoter|regulation of protein phosphorylation|positive regulation of protein phosphorylation|immature B cell differentiation|positive regulation of B cell apoptotic process|cellular response to starvation|TOR signaling|negative regulation of TOR signaling|positive regulation of peptidyl-serine phosphorylation|negative regulation of cyst…	guanyl-nucleotide exchange factor activity|protein binding|	10	0.1	0.0829	10	0.08	0.0779	0.09	0.145	0	0.8
ENSMUSG00000069678	PCGF1	polycomb group ring finger 1	nucleus|PcG protein complex|	transcription, DNA-templated|regulation of transcription, DNA-templated|histone H2A monoubiquitination|	protein binding|protein C-terminus binding|zinc ion binding|	10	0.2	0.703	10	-0.05	0.0425	0.08	0.131	-0.76	0.85
ENSMUSG00000004677	MYO9B	myosin IXB	ruffle|cytoplasm|cytosol|cell cortex|actin cytoskeleton|membrane|myosin complex|lamellipodium|filamentous actin|filopodium tip|perinuclear region of cytoplasm|	monocyte chemotaxis|ATP catabolic process|small GTPase mediated signal transduction|Rho protein signal transduction|establishment of cell polarity|actin filament-based movement|positive regulation of Rho GTPase activity|macrophage chemotaxis|regulation of small GTPase mediated signal transduction|lamellipodium morphogenesis|	microfilament motor activity|actin binding|Rho GTPase activator activity|protein binding|calmodulin binding|ATP binding|zinc ion binding|ATPase activity|actin-dependent ATPase activity|ATP-dependent protein binding|ADP binding|actin filament binding|	10	0.12	0.239	10	0	0	0.06	0.13	-0.76	0.82
ENSMUSG00000030834	ABCC6	ATP-binding cassette, sub-family C (CFTR/MRP), member 6	plasma membrane|integral component of membrane|basolateral plasma membrane|apical plasma membrane|lateral plasma membrane|	ATP catabolic process|transport|visual perception|response to drug|transmembrane transport|	transporter activity|ATP binding|ATPase activity, coupled to transmembrane movement of substances|	10	-0.35	1.63	10	0.54	0.216	-0.07	0.118	-0.74	1
ENSMUSG00000078517	EMC1	ER membrane protein complex subunit 1	integral component of membrane|ER membrane protein complex|	None	None	10	0.1	0.141	10	0.04	0.0282	0.06	0.115	-0.72	0.88
ENSMUSG00000021715	CWC27	CWC27 spliceosome-associated protein homolog (S. cerevisiae)	catalytic step 2 spliceosome|	mRNA splicing, via spliceosome|protein peptidyl-prolyl isomerization|protein folding|	peptidyl-prolyl cis-trans isomerase activity|	10	-0.1	0.125	10	-0.04	0.0199	-0.06	0.11	-0.93	0.67
ENSMUSG00000043015	TMEM194B	transmembrane protein 194B	integral component of membrane|	None	None	10	0	0	10	0.1	0.189	0.07	0.108	-0.55	0.99
ENSMUSG00000030329	PIANP	PILR alpha associated neural protein	integral component of membrane|	None	None	10	0	0	10	0.52	0.49	0.1	0.104	-0.7	1
ENSMUSG00000027291	VPS39	vacuolar protein sorting 39 homolog (S. cerevisiae)	lysosomal membrane|HOPS complex|late endosome membrane|	intracellular protein transport|vesicle-mediated transport|regulation of catalytic activity|	small GTPase regulator activity|	10	0.49	1.14	10	0	0	0.07	0.0996	-1.35	1.77
ENSMUSG00000032324	TSPAN3	tetraspanin 3	integral component of membrane|extracellular vesicular exosome|	biological_process|	molecular_function|	10	0.09	0.167	10	-0.03	0.0174	0.05	0.0958	-0.94	0.7
ENSMUSG00000027671	ACTL6A	actin-like 6A	nuclear chromatin|nucleus|nucleoplasm|plasma membrane|SWI/SNF complex|Ino80 complex|NuA4 histone acetyltransferase complex|protein complex|npBAF complex|npBAF complex|	neural retina development|DNA repair|DNA recombination|chromatin organization|chromatin remodeling|chromatin remodeling|transcription, DNA-templated|regulation of transcription from RNA polymerase II promoter|signal transduction|nervous system development|regulation of growth|ATP-dependent chromatin remodeling|histone H4 acetylation|histone H2A acetylation|	RNA polymerase II core promoter proximal region sequence-specific DNA binding|RNA polymerase II distal enhancer sequence-specific DNA binding|chromatin binding|transcription coactivator activity|protein binding|nucleosomal DNA binding|	10	0	0	10	0.59	1.46	0.12	0.0766	-0.62	1.81
ENSMUSG00000063728	MAGEA6	melanoma antigen family A, 6	cellular_component|	biological_process|	molecular_function|protein binding|	10	0	0	10	0.14	0.155	0.11	0.0679	-0.59	0.96
ENSMUSG00000024456	DIAP1	diaphanous homolog 1 (Drosophila)	cytoplasm|cytoskeleton|plasma membrane|membrane|ruffle membrane|cell projection|neuron projection|mitotic spindle|	cytoskeleton organization|actin filament organization|sensory perception of sound|regulation of cell shape|cellular component organization|actin cytoskeleton organization|actin filament polymerization|positive regulation of cell migration|neuron projection development|regulation of microtubule-based process|protein localization to microtubule|regulation of release of sequestered calcium ion into …	actin binding|protein binding|profilin binding|Rho GTPase binding|identical protein binding|ion channel binding|ion channel binding|poly(A) RNA binding|	10	0.09	0.0355	10	0.04	0.0332	0.05	0.0535	-0.82	0.82
ENSMUSG00000038390	GPR162	G protein-coupled receptor 162	plasma membrane|integral component of membrane|	G-protein coupled receptor signaling pathway|	G-protein coupled receptor activity|	10	0.25	0.479	10	0	0	0.04	0.044	-0.8	0.88
ENSMUSG00000032633	FLCN	folliculin	nucleus|cytoplasm|plasma membrane|midbody|cell-cell contact zone|	negative regulation of transcription from RNA polymerase II promoter|negative regulation of transcription from RNA polymerase II promoter|in utero embryonic development|regulation of protein phosphorylation|positive regulation of protein phosphorylation|cell-cell junction assembly|positive regulation of gene expression|negative regulation of gene expression|negative regulation of mitochondrion or…	protein binding|protein complex binding|	10	-0.17	0.107	10	0.11	0.242	0.05	0.0411	-0.9	0.76
ENSMUSG00000000131	XPO6	exportin 6	nucleus|nucleus|nucleolus|cytoplasm|cytoplasm|plasma membrane|	protein export from nucleus|	protein binding|Ran GTPase binding|protein transporter activity|	10	0	0	10	0.12	0.323	0.05	0.037	0	0.83
ENSMUSG00000046387	PCDHB17	protocadherin beta 17 pseudogene	None	None	None	10	0	0	10	0.06	0.0729	0.04	0.0288	-0.61	0.97
ENSMUSG00000029075	TNFRSF4	tumor necrosis factor receptor superfamily, member 4	integral component of plasma membrane|external side of plasma membrane|cell surface|	inflammatory response|immune response|cellular defense response|positive regulation of B cell proliferation|tumor necrosis factor-mediated signaling pathway|T cell proliferation|regulation of apoptotic process|negative regulation of sequence-specific DNA binding transcription factor activity|regulation of protein kinase activity|negative regulation of transcription, DNA-templated|negative regulat…	tumor necrosis factor-activated receptor activity|	10	0.16	0.356	10	-0.04	0.0523	-0.03	0.0275	-0.82	0.8
ENSMUSG00000041423	PAQR6	progestin and adipoQ receptor family member VI	integral component of membrane|	None	receptor activity|	10	0	0	10	0.05	0.059	0.02	0.00843	-1	1.36
ENSMUSG00000032249	ANP32A	acidic (leucine-rich) nuclear phosphoprotein 32 family, member A	nucleus|nucleoplasm|cytoplasm|endoplasmic reticulum|perinuclear region of cytoplasm|	transcription, DNA-templated|regulation of transcription, DNA-templated|nucleocytoplasmic transport|nucleocytoplasmic transport|gene expression|RNA metabolic process|mRNA metabolic process|intracellular signal transduction|	protein binding|poly(A) RNA binding|	10	-0.02	0.00464	10	-0.04	0.00409	-0.02	0.0074	-1.57	0.76
ENSMUSG00000042682	SELK	selenoprotein K	endoplasmic reticulum|endoplasmic reticulum membrane|plasma membrane|integral component of membrane|	calcium ion transport|response to oxidative stress|positive regulation of T cell proliferation|respiratory burst after phagocytosis|intrinsic apoptotic signaling pathway in response to endoplasmic reticulum stress|positive regulation of T cell migration|	None	10	0	0	10	0.18	0.261	0.01	0.00615	-0.87	0.75
ENSMUSG00000035158	MITF	microphthalmia-associated transcription factor	nucleus|protein complex|	regulation of transcription, DNA-templated|transcription from RNA polymerase II promoter|protein complex assembly|osteoclast differentiation|melanocyte differentiation|regulation of cell proliferation|camera-type eye development|canonical Wnt signaling pathway involved in negative regulation of apoptotic process|cell fate commitment|regulation of osteoclast differentiation|positive regulation of …	RNA polymerase II core promoter proximal region sequence-specific DNA binding|RNA polymerase II core promoter proximal region sequence-specific DNA binding transcription factor activity involved in positive regulation of transcription|RNA polymerase II core promoter proximal region sequence-specific DNA binding transcription factor activity involved in positive regulation of transcription|chromat…	10	0	0	10	-0.09	0.214	0.02	0.00514	-0.63	0.97
ENSMUSG00000031749	ST3GAL2	ST3 beta-galactoside alpha-2,3-sialyltransferase 2	Golgi membrane|extracellular region|integral component of Golgi membrane|Golgi cisterna membrane|	carbohydrate metabolic process|amino sugar metabolic process|cellular protein modification process|O-glycan processing|keratan sulfate biosynthetic process|glycosaminoglycan metabolic process|keratan sulfate metabolic process|post-translational protein modification|cellular protein metabolic process|small molecule metabolic process|sialylation|sialylation|	beta-galactoside (CMP) alpha-2,3-sialyltransferase activity|	10	-0.29	0.887	10	0	0	-0.01	0.0045	-0.98	0.64
ENSMUSG00000036622	ATP13A2	ATPase type 13A2	lysosome|lysosomal membrane|integral component of membrane|	ATP catabolic process|cation transport|cell death|	protein binding|ATP binding|cation-transporting ATPase activity|metal ion binding|	10	0	0	10	0.11	0.136	0.01	0.00293	-0.73	0.91
ENSMUSG00000048076	ARF1	ADP-ribosylation factor 1	Golgi membrane|cytosol|plasma membrane|postsynaptic density|sarcomere|cell junction|neuron projection|postsynaptic membrane|perinuclear region of cytoplasm|extracellular vesicular exosome|	regulation of receptor internalization|GTP catabolic process|phospholipid metabolic process|phosphatidylinositol biosynthetic process|cellular copper ion homeostasis|retrograde vesicle-mediated transport, Golgi to ER|post-Golgi vesicle-mediated transport|small GTPase mediated signal transduction|protein transport|viral process|antigen processing and presentation of exogenous peptide antigen via M…	GTPase activity|receptor signaling protein activity|protein binding|GTP binding|poly(A) RNA binding|	10	-0.38	0.675	10	0.06	0.0366	0.01	0.00262	-1.35	1
ENSMUSG00000058486	WDR91	WD repeat domain 91	None	None	None	10	-0.04	0.017	10	0.56	0.504	-0.01	0.00135	-0.82	1.64
ENSMUSG00000042195	SLC35F2	solute carrier family 35, member F2	cellular_component|integral component of membrane|	transport|biological_process|	molecular_function|	10	0.17	0.497	10	0	0	0	0	0	0.81
ENSMUSG00000020611	GNA13	guanine nucleotide binding protein (G protein), alpha 13	nucleus|heterotrimeric G-protein complex|plasma membrane|membrane|brush border membrane|melanosome|extracellular vesicular exosome|	patterning of blood vessels|in utero embryonic development|GTP catabolic process|cellular component movement|signal transduction|adenylate cyclase-activating G-protein coupled receptor signaling pathway|positive regulation of cytosolic calcium ion concentration|Rho protein signal transduction|blood coagulation|regulation of cell shape|cell differentiation|platelet activation|regulation of cell mi…	GTPase activity|signal transducer activity|protein binding|GTP binding|G-protein beta/gamma-subunit complex binding|type 1 angiotensin receptor binding|D5 dopamine receptor binding|metal ion binding|	10	0	0	10	0	0	0	0	-0.64	0.98
ENSMUSG00000051989	SMIM11	small integral membrane protein 11	cellular_component|integral component of membrane|	biological_process|	molecular_function|	10	-0.16	0.484	10	0	0	0	0	-1.7	0
ENSMUSG00000031170	SLC38A5	solute carrier family 38, member 5	plasma membrane|integral component of membrane|	amino acid transmembrane transport|ion transport|amino acid transport|glycine transport|transmembrane transport|	glycine transmembrane transporter activity|	10	0	0	10	0	0	0	0	0	0
ENSMUSG00000036744	OLFR701	olfactory receptor 701	plasma membrane|membrane|integral component of membrane|	signal transduction|G-protein coupled receptor signaling pathway|sensory perception of smell|response to stimulus|detection of chemical stimulus involved in sensory perception of smell|	signal transducer activity|G-protein coupled receptor activity|olfactory receptor activity|	10	0	0	10	0	0	0	0	-0.82	0
ENSMUSG00000042426	DHX29	DEAH (Asp-Glu-Ala-His) box polypeptide 29	mitochondrion|eukaryotic 43S preinitiation complex|	ATP catabolic process|translational initiation|	translation initiation factor activity|ATP binding|ATP-dependent helicase activity|ribosomal small subunit binding|poly(A) RNA binding|	10	0.08	0.067	10	-0.01	0.0067	0	0	-0.74	1.77
ENSMUSG00000057706	MEX3B	mex-3 RNA binding family member B	cytoplasmic mRNA processing body|nucleus|cytoplasm|	protein phosphorylation|protein autophosphorylation|	calcium ion binding|zinc ion binding|poly(A) RNA binding|	10	-0.16	0.147	10	0	0	0	0	-0.85	0
ENSMUSG00000038175	MYLIP	myosin regulatory light chain interacting protein	intracellular|cytoplasm|cytoskeleton|plasma membrane|extrinsic component of membrane|	cellular component movement|nervous system development|negative regulation of low-density lipoprotein particle clearance|protein ubiquitination|protein destabilization|regulation of low-density lipoprotein particle receptor catabolic process|cholesterol homeostasis|protein ubiquitination involved in ubiquitin-dependent protein catabolic process|positive regulation of protein catabolic process|	ubiquitin-protein transferase activity|protein binding|cytoskeletal protein binding|zinc ion binding|ligase activity|	10	-0.02	0.00628	10	0	0	0	0	-0.81	0
ENSMUSG00000052056	ZFP217	zinc finger protein 217	histone deacetylase complex|nucleoplasm|	regulation of transcription, DNA-templated|cell aging|negative regulation of transcription, DNA-templated|	transcription regulatory region DNA binding|	10	0	0	10	0	0	0	0	-0.81	0.82
ENSMUSG00000017299	DNTTIP1	deoxynucleotidyltransferase, terminal, interacting protein 1	nucleus|nucleolus|	None	None	10	0	0	10	0	0	0	0	0	0
ENSMUSG00000035845	ALG12	ALG12, alpha-1,6-mannosyltransferase	endoplasmic reticulum|endoplasmic reticulum membrane|membrane|integral component of membrane|	protein folding|protein N-linked glycosylation|dolichol-linked oligosaccharide biosynthetic process|dolichol-linked oligosaccharide biosynthetic process|protein N-linked glycosylation via asparagine|post-translational protein modification|cellular protein metabolic process|mannosylation|mannosylation|	alpha-1,6-mannosyltransferase activity|dol-P-Man:Man(7)GlcNAc(2)-PP-Dol alpha-1,6-mannosyltransferase activity|	10	0	0	10	0	0	0	0	-0.85	0
ENSMUSG00000028484	PSIP1	PC4 and SFRS1 interacting protein 1	nucleus|nucleoplasm|nucleoplasm|nuclear heterochromatin|cytosol|nuclear periphery|transcriptionally active chromatin|	mRNA 5'-splice site recognition|transcription, DNA-templated|regulation of transcription, DNA-templated|response to oxidative stress|response to heat|viral process|positive regulation of transcription from RNA polymerase II promoter|establishment of integrated proviral latency|	RNA polymerase II transcription coactivator activity|chromatin binding|protein binding|activating transcription factor binding|poly(A) RNA binding|supercoiled DNA binding|	10	0	0	10	0	0	0	0	0	0
ENSMUSG00000024213	NUDT3	nudix (nucleoside diphosphate linked moiety X)-type motif 3	cytosol|extracellular vesicular exosome|	cell-cell signaling|diadenosine polyphosphate catabolic process|inositol phosphate metabolic process|small molecule metabolic process|diphosphoinositol polyphosphate catabolic process|	magnesium ion binding|diphosphoinositol-polyphosphate diphosphatase activity|inositol diphosphate tetrakisphosphate diphosphatase activity|inositol-1-diphosphate-2,3,4,5,6-pentakisphosphate diphosphatase activity|inositol-3-diphosphate-1,2,4,5,6-pentakisphosphate diphosphatase activity|inositol-5-diphosphate-1,2,3,4,6-pentakisphosphate diphosphatase activity|inositol-1,5-bisdiphosphate-2,3,4,6-te…	10	-0.19	0.138	10	0	0	0	0	-0.96	0.65
ENSMUSG00000033161	ATP1A1	ATPase, Na+/K+ transporting, alpha 1 polypeptide	endosome|endoplasmic reticulum|Golgi apparatus|plasma membrane|plasma membrane|sodium:potassium-exchanging ATPase complex|caveola|membrane|integral component of membrane|basolateral plasma membrane|T-tubule|melanosome|protein complex|extracellular vesicular exosome|	regulation of the force of heart contraction|regulation of sodium ion transport|ATP biosynthetic process|regulation of blood pressure|potassium ion import|negative regulation of glucocorticoid biosynthetic process|ion transmembrane transport|sodium ion transmembrane transport|sodium ion transmembrane transport|sodium ion transmembrane transport|response to drug|negative regulation of heart contra…	sodium:potassium-exchanging ATPase activity|protein binding|ATP binding|protein kinase binding|protein domain specific binding|ankyrin binding|potassium ion binding|sodium ion binding|ADP binding|phosphatidylinositol 3-kinase binding|chaperone binding|	10	0.01	0.000624	10	-0.11	0.126	0	0	-0.93	0.66
ENSMUSG00000031311	NONO	non-POU domain containing, octamer-binding	nucleus|nucleus|membrane|nuclear matrix|nuclear speck|paraspeckles|	DNA repair|DNA recombination|transcription, DNA-templated|mRNA processing|circadian rhythm|RNA splicing|regulation of circadian rhythm|negative regulation of transcription, DNA-templated|	nucleotide binding|core promoter binding|protein binding|identical protein binding|poly(A) RNA binding|	10	0	0	10	-0.2	0.26	0	0	-2.38	0.92
ENSMUSG00000036368	RMDN2	regulator of microtubule dynamics 2	spindle pole|cytoplasm|mitochondrion|microtubule|integral component of membrane|	None	None	10	0	0	10	0	0	0	0	0	0
ENSMUSG00000041483	ZFP281	zinc finger protein 281	nucleus|	transcription, DNA-templated|regulation of transcription, DNA-templated|embryonic body morphogenesis|negative regulation of gene expression|cell differentiation|negative regulation of transcription, DNA-templated|positive regulation of transcription, DNA-templated|stem cell differentiation|	core promoter binding|nucleic acid binding|DNA binding|sequence-specific DNA binding transcription factor activity|sequence-specific DNA binding transcription factor activity|transcription corepressor activity|protein binding|sequence-specific DNA binding|transcription regulatory region DNA binding|metal ion binding|	10	-0.81	2.31	10	0	0	0	0	-1.96	0.42
ENSMUSG00000020029	NUDT4	nudix (nucleoside diphosphate linked moiety X)-type motif 4	intracellular|cytosol|	cyclic nucleotide metabolic process|calcium-mediated signaling|cyclic-nucleotide-mediated signaling|intracellular signal transduction|inositol phosphate metabolic process|small molecule metabolic process|regulation of RNA export from nucleus|intracellular transport|	diphosphoinositol-polyphosphate diphosphatase activity|snoRNA binding|metal ion binding|inositol diphosphate tetrakisphosphate diphosphatase activity|inositol-1-diphosphate-2,3,4,5,6-pentakisphosphate diphosphatase activity|inositol-3-diphosphate-1,2,4,5,6-pentakisphosphate diphosphatase activity|inositol-5-diphosphate-1,2,3,4,6-pentakisphosphate diphosphatase activity|inositol-1,5-bisdiphosphate…	10	-0.39	0.975	10	0	0	0	0	-1	0.64
ENSMUSG00000025153	FASN	fatty acid synthase	cytoplasm|mitochondrion|Golgi apparatus|cytosol|plasma membrane|membrane|melanosome|glycogen granule|extracellular vesicular exosome|	osteoblast differentiation|acetyl-CoA metabolic process|energy reserve metabolic process|fatty acid metabolic process|fatty acid biosynthetic process|vitamin metabolic process|water-soluble vitamin metabolic process|pantothenate metabolic process|triglyceride biosynthetic process|positive regulation of cellular metabolic process|long-chain fatty-acyl-CoA biosynthetic process|cellular lipid metabo…	fatty acid synthase activity|[acyl-carrier-protein] S-acetyltransferase activity|[acyl-carrier-protein] S-malonyltransferase activity|3-oxoacyl-[acyl-carrier-protein] synthase activity|3-oxoacyl-[acyl-carrier-protein] reductase (NADPH) activity|3-hydroxypalmitoyl-[acyl-carrier-protein] dehydratase activity|enoyl-[acyl-carrier-protein] reductase (NADPH, B-specific) activity|oleoyl-[acyl-carrier-pr…	10	-0.33	0.897	10	0	0	0	0	-0.86	0
ENSMUSG00000022201	ZFR	zinc finger RNA binding protein	nucleus|chromosome|cytoplasm|	multicellular organismal development|	DNA binding|protein binding|zinc ion binding|poly(A) RNA binding|	10	-0.05	0.0152	10	0	0	0	0	-0.8	0
ENSMUSG00000027131	EMC4	ER membrane protein complex subunit 4	integral component of membrane|ER membrane protein complex|	apoptotic process|	None	10	0	0	10	0	0	0	0	0	0.82
ENSMUSG00000026737	PIP4K2A	phosphatidylinositol-5-phosphate 4-kinase, type II, alpha	cellular_component|nucleus|cytosol|plasma membrane|	phospholipid metabolic process|phosphatidylinositol biosynthetic process|megakaryocyte development|small molecule metabolic process|phosphatidylinositol phosphorylation|phosphatidylinositol phosphorylation|	ATP binding|1-phosphatidylinositol-4-phosphate 5-kinase activity|1-phosphatidylinositol-5-phosphate 4-kinase activity|	10	0	0	10	0	0	0	0	0	0.81
ENSMUSG00000013415	IGF2BP1	insulin-like growth factor 2 mRNA binding protein 1	nucleus|cytoplasm|cytosol|cytoplasmic stress granule|lamellipodium|filopodium|axon|growth cone|ribonucleoprotein complex|dendritic spine|perinuclear region of cytoplasm|CRD-mediated mRNA stability complex|	gene expression|regulation of mRNA stability involved in response to stress|negative regulation of translation|regulation of cytokine biosynthetic process|mRNA transport|CRD-mediated mRNA stabilization|	nucleotide binding|mRNA binding|mRNA 3'-UTR binding|protein binding|poly(A) RNA binding|translation regulator activity|mRNA 5'-UTR binding|	10	0	0	10	0	0	0	0	-0.88	0.76
ENSMUSG00000001739	CLDN15	claudin 15	plasma membrane|tight junction|integral component of membrane|	ion transport|calcium-independent cell-cell adhesion|cell junction assembly|cell-cell junction organization|tight junction assembly|	structural molecule activity|identical protein binding|	10	-1.04	0.811	10	0	0	0	0	-2.62	0.72
ENSMUSG00000017756	SLC12A7	solute carrier family 12 (potassium/chloride transporter), member 7	plasma membrane|integral component of plasma membrane|	transport|ion transport|potassium ion transport|chloride transport|cell volume homeostasis|transmembrane transport|chloride transmembrane transport|chloride transmembrane transport|	potassium:chloride symporter activity|protein kinase binding|	10	0	0	10	0	0	0	0	-0.85	0
ENSMUSG00000026069	IL1RL1	interleukin 1 receptor-like 1	extracellular region|external side of plasma membrane|integral component of membrane|	negative regulation of T-helper 1 type immune response|immune response|signal transduction|negative regulation of interferon-gamma production|positive regulation of interleukin-5 production|intracellular signal transduction|interleukin-33-mediated signaling pathway|positive regulation of macrophage activation|negative regulation of I-kappaB kinase/NF-kappaB signaling|positive regulation of inflam…	interleukin-33 binding|interleukin-33 receptor activity|cytokine receptor activity|interleukin-1 receptor activity|receptor signaling protein activity|protein binding|	10	0	0	10	0	0	0	0	0	0.8
ENSMUSG00000026374	TSN	translin	nucleus|cytoplasm|	DNA recombination|nucleic acid phosphodiester bond hydrolysis|	DNA binding|mRNA binding|endonuclease activity|protein binding|protein complex binding|sequence-specific DNA binding|	10	-0.02	0.00428	10	0	0	0	0	-1.62	0
ENSMUSG00000034673	PBX2	pre-B-cell leukemia homeobox 2	nucleus|transcription factor complex|	transcription, DNA-templated|proximal/distal pattern formation|embryonic limb morphogenesis|positive regulation of transcription from RNA polymerase II promoter|	chromatin binding|sequence-specific DNA binding transcription factor activity|transcription factor binding|sequence-specific DNA binding|	10	0	0	10	0	0	0	0	0	0
ENSMUSG00000037957	WDR20A	N/A	None	None	None	10	0	0	10	0	0	0	0	0	0
ENSMUSG00000019787	TRDN	triadin	cytoplasm|endoplasmic reticulum|plasma membrane|voltage-gated calcium channel complex|junctional sarcoplasmic reticulum membrane|junctional sarcoplasmic reticulum membrane|integral component of membrane|sarcoplasmic reticulum|junctional membrane complex|sarcoplasmic reticulum membrane|sarcoplasmic reticulum lumen|calcium channel complex|	cellular calcium ion homeostasis|muscle contraction|regulation of cell communication by electrical coupling|regulation of release of sequestered calcium ion into cytosol by sarcoplasmic reticulum|response to organic cyclic compound|release of sequestered calcium ion into cytosol by sarcoplasmic reticulum|myotube differentiation|cytoplasmic microtubule organization|ion transmembrane transport|regu…	receptor binding|protein binding|protein binding, bridging|protein homodimerization activity|ion channel binding|	10	0	0	10	0	0	0	0	0	0
ENSMUSG00000090958	LRRC32	leucine rich repeat containing 32	integral component of plasma membrane|	positive regulation of gene expression|negative regulation of activated T cell proliferation|negative regulation of cytokine secretion|	None	10	0.12	0.216	10	0	0	0	0	-0.74	0.89
ENSMUSG00000067567	HDAC8	histone deacetylase 8	histone deacetylase complex|nuclear chromosome|nucleus|cytoplasm|cytosol|	negative regulation of transcription from RNA polymerase II promoter|mitotic cell cycle|chromatin assembly or disassembly|transcription, DNA-templated|sister chromatid cohesion|chromatin modification|histone H3 deacetylation|histone H4 deacetylation|regulation of cohesin localization to chromatin|	histone deacetylase activity|transcription factor binding|NAD-dependent histone deacetylase activity (H3-K14 specific)|metal ion binding|NAD-dependent histone deacetylase activity (H3-K9 specific)|NAD-dependent histone deacetylase activity (H4-K16 specific)|NAD-dependent histone deacetylase activity (H3-K18 specific)|	10	0.07	0.0263	10	0	0	0	0	-0.91	0.75
ENSMUSG00000047260	EMC6	ER membrane protein complex subunit 6	integral component of membrane|ER membrane protein complex|	None	None	10	-0.09	0.0822	10	0.03	0.0191	0	0	-0.81	0.85

## Sheet: Primary_Neuron_PR50_expression
#GeneID	Symbol	GeneInfo	Localization	Process	Function	# elements 1	casTLE Effect 1	casTLE Score 1	# elements 2	casTLE Effect 2	casTLE Score 2	Combo casTLE Effect	Combo casTLE Score	Minimum Effect Estimate	Maximum Effect Estimate
ENSMUSG00000050043	TMX2	thioredoxin-related transmembrane protein 2	cellular_component|	biological_process|	molecular_function|	10	0.71	25.5	10	0.43	8.48	0.57	32.7	0.38	0.95
ENSMUSG00000038384	SETD1B	SET domain containing 1B	nucleus|chromosome|	transcription, DNA-templated|regulation of transcription, DNA-templated|chromatin modification|methylation|	nucleotide binding|molecular_function|nucleic acid binding|RNA binding|methyltransferase activity|transferase activity|histone-lysine N-methyltransferase activity|	10	0.43	9.94	10	0.58	11.3	0.52	20.3	0.26	0.89
ENSMUSG00000030917	TMEM159	transmembrane protein 159	cellular_component|membrane|integral component of membrane|	biological_process|	molecular_function|	10	1.42	23.1	10	0	0	1.42	19.7	1.08	2.84
ENSMUSG00000026872	ZEB2	zinc finger E-box binding homeobox 2	nucleus|	negative regulation of transcription from RNA polymerase II promoter|neural crest cell migration|somitogenesis|neural tube closure|transcription, DNA-templated|regulation of transcription, DNA-templated|central nervous system development|hippocampus development|cell proliferation in forebrain|positive regulation of Wnt signaling pathway|positive regulation of JUN kinase activity|positive regulati…	nucleic acid binding|DNA binding|metal ion binding|R-SMAD binding|	10	-0.48	17.9	10	0.08	0.197	-0.43	15.6	-0.87	-0.22
ENSMUSG00000032030	CUL5	cullin 5	nucleus|cytoplasm|plasma membrane|cullin-RING ubiquitin ligase complex|Cul5-RING ubiquitin ligase complex|	ubiquitin-dependent protein catabolic process|cytosolic calcium ion homeostasis|	protein binding|ubiquitin protein ligase binding|protein heterodimerization activity|	10	1.19	17.7	10	0	0	1.19	14.9	0.39	2.41
ENSMUSG00000037369	KDM6A	lysine (K)-specific demethylase 6A	nucleus|nucleus|histone methyltransferase complex|histone methyltransferase complex|	in utero embryonic development|neural tube closure|heart morphogenesis|respiratory system process|heart development|regulation of gene expression|chromatin modification|neural tube development|somite rostral/caudal axis specification|multicellular organism growth|mesodermal cell differentiation|embryonic organ development|notochord morphogenesis|oxidation-reduction process|canonical Wnt signaling…	sulfonate dioxygenase activity|RNA polymerase II core promoter proximal region sequence-specific DNA binding|protein binding|oxidoreductase activity|2,4-dichlorophenoxyacetate alpha-ketoglutarate dioxygenase activity|procollagen-proline dioxygenase activity|hypophosphite dioxygenase activity|identical protein binding|DNA-N1-methyladenine dioxygenase activity|metal ion binding|dioxygenase activity…	10	-0.38	12.2	10	-0.52	1.97	-0.38	13.7	-0.76	-0.16
ENSMUSG00000053754	CHD8	chromodomain helicase DNA binding protein 8	nucleus|nucleus|protein complex|MLL1 complex|	in utero embryonic development|ATP catabolic process|transcription, DNA-templated|regulation of transcription, DNA-templated|Wnt signaling pathway|chromatin modification|negative regulation of Wnt signaling pathway|DNA duplex unwinding|ATP-dependent chromatin remodeling|negative regulation of apoptotic process|negative regulation of apoptotic process|negative regulation of transcription, DNA-temp…	nucleotide binding|p53 binding|DNA binding|DNA binding|DNA helicase activity|helicase activity|protein binding|ATP binding|beta-catenin binding|DNA-dependent ATPase activity|hydrolase activity|hydrolase activity, acting on acid anhydrides|methylated histone binding|histone binding|armadillo repeat domain binding|	10	0.38	9.72	10	0.25	3.2	0.34	12.3	0.14	0.71
ENSMUSG00000042557	SIN3A	transcriptional regulator, SIN3A (yeast)	kinetochore|chromatin|nucleus|nucleus|transcription factor complex|cytoplasm|Sin3 complex|transcriptional repressor complex|transcriptional repressor complex|protein complex|intercellular bridge|	negative regulation of transcription from RNA polymerase II promoter|negative regulation of transcription from RNA polymerase II promoter|in utero embryonic development|activation of innate immune response|positive regulation of defense response to virus by host|hematopoietic progenitor cell differentiation|DNA replication|transcription, DNA-templated|regulation of transcription, DNA-templated|tr…	transcription regulatory region sequence-specific DNA binding|RNA polymerase II activating transcription factor binding|RNA polymerase II repressing transcription factor binding|RNA polymerase II transcription corepressor activity|DNA binding|chromatin binding|sequence-specific DNA binding transcription factor activity|transcription corepressor activity|protein binding|transcription factor bindin…	10	-0.36	13	10	-0.04	0.00601	-0.34	12.2	-0.65	-0.14
ENSMUSG00000027351	SPRED1	sprouty protein with EVH-1 domain 1, related sequence	nucleus|cytoplasm|plasma membrane|membrane|	inactivation of MAPK activity|multicellular organismal development|regulation of signal transduction|negative regulation of peptidyl-threonine phosphorylation|negative regulation of peptidyl-threonine phosphorylation|negative regulation of phosphatase activity|positive regulation of DNA damage response, signal transduction by p53 class mediator|negative regulation of protein serine/threonine kina…	stem cell factor receptor binding|protein binding|protein kinase binding|protein kinase binding|phosphatase binding|protein serine/threonine kinase inhibitor activity|	10	0.42	11.2	10	0.22	0.394	0.4	10.9	0.12	0.73
ENSMUSG00000010057	NPRL2	nitrogen permease regulator-like 2		protein phosphorylation|negative regulation of kinase activity|	protein kinase activity|GTPase activator activity|	10	-0.76	7.41	10	0.6	13	0.58	10.2	-0.64	1.45
ENSMUSG00000048154	KMT2D	lysine (K)-specific methyltransferase 2D	nucleus|histone methyltransferase complex|	oocyte growth|in utero embryonic development|chromatin silencing|transcription, DNA-templated|regulation of transcription, DNA-templated|positive regulation of cell proliferation|chromatin modification|methylation|positive regulation of intracellular estrogen receptor signaling pathway|response to estrogen|positive regulation of transcription from RNA polymerase II promoter|oogenesis|histone H3-K…	methyltransferase activity|zinc ion binding|transferase activity|histone-lysine N-methyltransferase activity|transcription regulatory region DNA binding|metal ion binding|	10	1.17	12.8	10	-0.1	0.31	1.16	9.64	0.08	2.35
ENSMUSG00000055943	EMC7	ER membrane protein complex subunit 7	membrane|integral component of membrane|ER membrane protein complex|	biological_process|	molecular_function|carbohydrate binding|	10	-0.44	5.14	10	-0.43	3.64	-0.43	8.42	-0.92	-0.11
ENSMUSG00000022521	CREBBP	CREB binding protein	histone acetyltransferase complex|nuclear chromatin|nuclear chromatin|condensed chromosome outer kinetochore|nucleus|nucleus|transcription factor complex|transcription factor complex|cytoplasm|nuclear body|PML body|protein complex|	negative regulation of transcription from RNA polymerase II promoter|transcription, DNA-templated|regulation of transcription, DNA-templated|regulation of transcription, DNA-templated|transcription from RNA polymerase II promoter|cell proliferation|histone acetylation|histone acetylation|N-terminal peptidyl-lysine acetylation|germ-line stem cell maintenance|positive regulation of transcription, D…	core promoter proximal region sequence-specific DNA binding|RNA polymerase II core promoter proximal region sequence-specific DNA binding transcription factor activity involved in negative regulation of transcription|RNA polymerase II transcription factor binding|RNA polymerase II transcription factor binding transcription factor activity involved in negative regulation of transcription|p53 bindi…	10	-0.14	2.05	10	-0.52	7.47	-0.48	8.4	-1.22	-0.06
ENSMUSG00000035762	TMEM161B	transmembrane protein 161B	cellular_component|membrane|integral component of membrane|	biological_process|	molecular_function|	10	0.36	5.67	10	0.87	3	0.39	7.63	0.05	1.16
ENSMUSG00000042590	IPO11	importin 11	intracellular|cell|nucleus|cytoplasm|	ribosomal protein import into nucleus|transport|intracellular protein transport|protein transport|	protein binding|Ran GTPase binding|protein transporter activity|	10	0.18	1.57	10	0.37	6.8	0.35	7.25	0.04	0.94
ENSMUSG00000014769	PSMB1	proteasome (prosome, macropain) subunit, beta type 1	proteasome complex|nucleus|cytoplasm|proteasome core complex|extracellular vesicular exosome|	proteolysis|proteolysis involved in cellular protein catabolic process|	endopeptidase activity|threonine-type endopeptidase activity|peptidase activity|hydrolase activity|	10	-0.48	8.28	10	0.11	0.75	-0.45	6.24	-1.06	-0.05
ENSMUSG00000038369	NCOA6	nuclear receptor coactivator 6	nucleus|nucleus|transcription factor complex|histone methyltransferase complex|	transcription, DNA-templated|regulation of transcription, DNA-templated|cellular response to DNA damage stimulus|brain development|heart development|positive regulation of transcription, DNA-templated|labyrinthine layer blood vessel development|	chromatin binding|transcription coactivator activity|	10	-0.14	1.31	10	0.42	8.54	0.35	6.15	0.02	1.13
ENSMUSG00000064145	ARIH2	ariadne homolog 2 (Drosophila)	nucleus|cytoplasm|	protein polyubiquitination|ubiquitin-dependent protein catabolic process|protein ubiquitination involved in ubiquitin-dependent protein catabolic process|developmental cell growth|protein K63-linked ubiquitination|protein K48-linked ubiquitination|hematopoietic stem cell proliferation|	nucleic acid binding|ubiquitin-protein transferase activity|protein binding|zinc ion binding|UDP-N-acetylmuramoylalanyl-D-glutamyl-2,6-diaminopimelate-D-alanyl-D-alanine ligase activity|ligase activity|ribosomal S6-glutamic acid ligase activity|coenzyme F420-0 gamma-glutamyl ligase activity|coenzyme F420-2 alpha-glutamyl ligase activity|metal ion binding|protein-glycine ligase activity|protein-gl…	10	0.26	4.15	10	0.22	1.49	0.25	5.35	-0.04	0.89
ENSMUSG00000027641	RBL1	retinoblastoma-like 1 (p107)	nucleus|nucleus|transcription factor complex|	negative regulation of transcription from RNA polymerase II promoter|transcription, DNA-templated|regulation of transcription, DNA-templated|regulation of transcription from RNA polymerase II promoter|cell cycle|chromatin modification|regulation of lipid kinase activity|regulation of cell cycle|	protein binding|transcription factor binding|	10	0.1	0.701	10	0.37	6.01	0.32	5.16	-0.03	1
ENSMUSG00000040761	SPEN	SPEN homolog, transcriptional regulator (Drosophila)	nucleus|nucleus|transcriptional repressor complex|extracellular vesicular exosome|	negative regulation of transcription from RNA polymerase II promoter|transcription, DNA-templated|regulation of transcription, DNA-templated|transcription from RNA polymerase II promoter|Notch signaling pathway|negative regulation of transcription, DNA-templated|negative regulation of transcription, DNA-templated|positive regulation of transcription, DNA-templated|positive regulation of neurogene…	nucleotide binding|RNA polymerase II transcription factor binding|RNA polymerase II transcription factor binding transcription factor activity involved in negative regulation of transcription|nucleic acid binding|single-stranded DNA binding|sequence-specific DNA binding transcription factor activity|transcription corepressor activity|RNA binding|protein binding|poly(A) RNA binding|	10	0.27	4.24	10	0.2	1.19	0.26	5.08	-0.02	0.79
ENSMUSG00000026812	TSC1	tuberous sclerosis 1	cytoplasm|cytoplasm|cytosol|cytoskeleton|actin filament|cell cortex|membrane|lamellipodium|growth cone|TSC1-TSC2 complex|TSC1-TSC2 complex|intracellular membrane-bounded organelle|protein complex|	kidney development|neural tube closure|regulation of cell-matrix adhesion|rRNA export from nucleus|regulation of translation|potassium ion transport|potassium ion transport|cell-matrix adhesion|nervous system development|negative regulation of cell proliferation|negative regulation of cell proliferation|embryo development|negative regulation of translation|hippocampus development|cerebral cortex …	protein binding|GTPase regulator activity|GTPase regulator activity|GTPase activating protein binding|protein N-terminus binding|protein N-terminus binding|chaperone binding|	10	0.34	2.9	10	0.29	2.19	0.33	4.76	-0.05	0.84
ENSMUSG00000027671	ACTL6A	actin-like 6A	nuclear chromatin|nucleus|nucleus|plasma membrane|SWI/SNF complex|Ino80 complex|NuA4 histone acetyltransferase complex|protein complex|npBAF complex|npBAF complex|	DNA repair|DNA recombination|chromatin remodeling|chromatin remodeling|transcription, DNA-templated|regulation of transcription, DNA-templated|cellular response to DNA damage stimulus|nervous system development|chromatin modification|regulation of growth|ATP-dependent chromatin remodeling|histone H4 acetylation|histone H2A acetylation|	RNA polymerase II core promoter proximal region sequence-specific DNA binding|RNA polymerase II distal enhancer sequence-specific DNA binding|chromatin binding|protein binding|nucleosomal DNA binding|	10	0	0	10	0.37	6.02	0.33	4.76	-0.06	0.78
ENSMUSG00000060073	PSMA3	proteasome (prosome, macropain) subunit, alpha type 3	proteasome complex|nucleus|cytoplasm|proteasome core complex|proteasome core complex|proteasome core complex, alpha-subunit complex|extracellular vesicular exosome|	proteolysis|ubiquitin-dependent protein catabolic process|proteolysis involved in cellular protein catabolic process|	endopeptidase activity|threonine-type endopeptidase activity|protein binding|peptidase activity|hydrolase activity|	10	-0.47	6.5	10	0.27	2.14	-0.45	4.72	-1	0.38
ENSMUSG00000031604	SC4MOL	N/A				10	-0.11	0.862	10	-0.58	6.91	-0.52	4.72	-1.54	0.92
ENSMUSG00000037490	SLC2A12	solute carrier family 2 (facilitated glucose transporter), member 12	membrane|integral component of membrane|	transport|carbohydrate transport|glucose transport|transmembrane transport|	molecular_function|transporter activity|transmembrane transporter activity|substrate-specific transmembrane transporter activity|	10	0.83	3.51	10	0.38	2.25	0.61	4.57	0.02	1.61
ENSMUSG00000023243	KCNK5	potassium channel, subfamily K, member 5	membrane|integral component of membrane|	transport|ion transport|		10	0.21	3.78	10	0.22	1.03	0.21	4.56	-0.28	0.91
ENSMUSG00000025027	XPNPEP1	X-prolyl aminopeptidase (aminopeptidase P) 1, soluble	cytoplasm|cytosol|extracellular vesicular exosome|	proteolysis|bradykinin catabolic process|	aminopeptidase activity|peptidase activity|metallopeptidase activity|hydrolase activity|manganese ion binding|protein homodimerization activity|metal ion binding|metalloaminopeptidase activity|	10	-0.13	0.27	10	-0.64	6.52	-0.61	4.32	-1.41	0.26
ENSMUSG00000024335	BRD2	bromodomain containing 2	nucleus|cytoplasm|	nucleosome assembly|transcription, DNA-templated|regulation of transcription, DNA-templated|regulation of transcription from RNA polymerase II promoter|chromatin modification|	chromatin binding|lysine-acetylated histone binding|	10	-0.33	6.19	10	0.11	0.415	-0.3	4.28	-0.75	0.22
ENSMUSG00000035569	ANKRD11	ankyrin repeat domain 11	nucleus|cytoplasm|plasma membrane|	in utero embryonic development|tissue homeostasis|multicellular organism growth|odontogenesis of dentin-containing tooth|skeletal system morphogenesis|skeletal system morphogenesis|head morphogenesis|face morphogenesis|bone development|	molecular_function|	10	0.09	0.42	10	0.52	5.16	0.32	3.93	-0.08	1.18
ENSMUSG00000020166	CNOT2	CCR4-NOT transcription complex, subunit 2	nucleus|cytoplasm|membrane|CCR4-NOT complex|	negative regulation of transcription from RNA polymerase II promoter|trophectodermal cell differentiation|transcription, DNA-templated|regulation of transcription, DNA-templated|regulation of translation|multicellular organismal development|positive regulation of cytoplasmic mRNA processing body assembly|gene silencing by RNA|negative regulation of intracellular estrogen receptor signaling pathwa…	RNA polymerase II transcription corepressor binding|poly(A)-specific ribonuclease activity|	10	-0.18	2.3	10	-0.29	2	-0.2	3.85	-1.14	0.45
ENSMUSG00000031885	CBFB	core binding factor beta	nucleus|membrane|	ossification|osteoblast differentiation|lymphocyte differentiation|myeloid cell differentiation|positive regulation of transcription from RNA polymerase II promoter|cell maturation|definitive hemopoiesis|	DNA binding|transcription coactivator activity|protein binding|	10	0.67	2.66	10	0.31	1.5	0.38	3.68	-0.09	1.3
ENSMUSG00000063804	LIN28B	lin-28 homolog B (C. elegans)	nucleus|cytoplasm|	regulation of transcription, DNA-templated|miRNA catabolic process|gene silencing by RNA|pre-miRNA processing|RNA 3'-end processing|	nucleic acid binding|DNA binding|RNA binding|zinc ion binding|poly(A) RNA binding|metal ion binding|	10	0.38	5.24	10	0.04	0.092	0.35	3.6	-0.39	0.78
ENSMUSG00000028484	PSIP1	PC4 and SFRS1 interacting protein 1	nucleus|nucleoplasm|nuclear heterochromatin|nuclear periphery|transcriptionally active chromatin|	mRNA 5'-splice site recognition|transcription, DNA-templated|regulation of transcription, DNA-templated|transcription from RNA polymerase II promoter|response to oxidative stress|response to heat|positive regulation of transcription from RNA polymerase II promoter|	RNA polymerase II transcription coactivator activity|DNA binding|chromatin binding|activating transcription factor binding|poly(A) RNA binding|supercoiled DNA binding|	10	0.24	2.54	10	0.37	1.24	0.26	3.36	-0.59	0.84
ENSMUSG00000030286	EMC3	ER membrane protein complex subunit 3	membrane|integral component of membrane|ER membrane protein complex|	biological_process|	molecular_function|	10	-0.17	3.27	10	-0.08	0.282	-0.15	3.22	-0.64	0.46
ENSMUSG00000030329	PIANP	PILR alpha associated neural protein	cellular_component|membrane|integral component of membrane|	biological_process|	molecular_function|	10	0.19	3.56	10	0.05	0.0362	0.17	3.08	-0.28	0.76
ENSMUSG00000024477	PGGT1B	protein geranylgeranyltransferase type I, beta subunit	CAAX-protein geranylgeranyltransferase complex|	positive regulation of cell proliferation|protein geranylgeranylation|response to cytokine|positive regulation of cell cycle|negative regulation of nitric-oxide synthase biosynthetic process|	catalytic activity|prenyltransferase activity|protein geranylgeranyltransferase activity|CAAX-protein geranylgeranyltransferase activity|CAAX-protein geranylgeranyltransferase activity|drug binding|zinc ion binding|zinc ion binding|transferase activity|isoprenoid binding|peptide binding|metal ion binding|	10	-0.26	4.39	10	0.29	0.621	-0.22	3.03	-0.72	0.47
ENSMUSG00000038784	CNOT4	CCR4-NOT transcription complex, subunit 4	nucleus|cytoplasm|CCR4-NOT complex|	transcription, DNA-templated|regulation of transcription, DNA-templated|protein autoubiquitination|	nucleotide binding|nucleic acid binding|RNA binding|ubiquitin-protein transferase activity|zinc ion binding|UDP-N-acetylmuramoylalanyl-D-glutamyl-2,6-diaminopimelate-D-alanyl-D-alanine ligase activity|ligase activity|ribosomal S6-glutamic acid ligase activity|coenzyme F420-0 gamma-glutamyl ligase activity|coenzyme F420-2 alpha-glutamyl ligase activity|poly(A) RNA binding|metal ion binding|protein…	10	-0.23	4.39	10	0.07	0.176	-0.22	3	-0.81	0.39
ENSMUSG00000041235	CHD7	chromodomain helicase DNA binding protein 7	nucleus|	skeletal system development|blood vessel development|in utero embryonic development|in utero embryonic development|heart morphogenesis|heart morphogenesis|transcription, DNA-templated|regulation of transcription, DNA-templated|rRNA processing|central nervous system development|adult heart development|sensory perception of sound|locomotory behavior|adult walking behavior|blood circulation|chromati…	nucleotide binding|DNA binding|chromatin binding|helicase activity|protein binding|ATP binding|hydrolase activity|hydrolase activity, acting on acid anhydrides|	10	0.18	2.04	10	0.26	1.18	0.23	2.93	-0.21	0.87
ENSMUSG00000069678	PCGF1	polycomb group ring finger 1	nucleus|PcG protein complex|	transcription, DNA-templated|regulation of transcription, DNA-templated|histone H2A monoubiquitination|	protein C-terminus binding|zinc ion binding|metal ion binding|	10	-0.09	0.485	10	-0.38	3.97	-0.21	2.91	-0.87	0.25
ENSMUSG00000035992	FNIP1	folliculin interacting protein 1	cytoplasm|cytoplasm|	negative regulation of transcription from RNA polymerase II promoter|regulation of protein phosphorylation|positive regulation of protein phosphorylation|immature B cell differentiation|positive regulation of B cell apoptotic process|positive regulation of B cell apoptotic process|cellular response to starvation|TOR signaling|negative regulation of TOR signaling|positive regulation of peptidyl-se…	guanyl-nucleotide exchange factor activity|protein binding|	10	-0.01	0.0168	10	-1.05	5.17	-0.21	2.86	-2.21	0.1
ENSMUSG00000029075	TNFRSF4	tumor necrosis factor receptor superfamily, member 4	plasma membrane|external side of plasma membrane|cell surface|membrane|integral component of membrane|	inflammatory response|inflammatory response|cellular defense response|programmed cell death|positive regulation of B cell proliferation|tumor necrosis factor-mediated signaling pathway|T cell proliferation|regulation of apoptotic process|negative regulation of sequence-specific DNA binding transcription factor activity|regulation of protein kinase activity|negative regulation of transcription, DN…	tumor necrosis factor-activated receptor activity|protein binding|	10	-0.19	3.11	10	-0.1	0.1	-0.17	2.86	-0.87	0.89
ENSMUSG00000050017	PITPNB	phosphatidylinositol transfer protein, beta	intracellular|cytoplasm|Golgi apparatus|extracellular vesicular exosome|	in utero embryonic development|transport|phospholipid transport|	phospholipid binding|lipid binding|phosphatidylinositol transporter activity|	10	-0.26	2.05	10	-0.3	1.01	-0.26	2.84	-0.8	0.45
ENSMUSG00000040648	PPIP5K2	diphosphoinositol pentakisphosphate kinase 2	cytoplasm|	phosphorylation|	nucleotide binding|inositol hexakisphosphate 5-kinase activity|acid phosphatase activity|ATP binding|kinase activity|transferase activity|diphosphoinositol-pentakisphosphate kinase activity|inositol hexakisphosphate 1-kinase activity|inositol hexakisphosphate 3-kinase activity|	10	-0.56	5.11	10	0.12	0.196	-0.42	2.83	-1.24	0.33
ENSMUSG00000039840	EPG5	ectopic P-granules autophagy protein 5 homolog (C. elegans)	intracellular|cell|	autophagy|endocytic recycling|autophagic vacuole maturation|	molecular_function|	10	-0.22	3.86	10	0.26	2.11	-0.2	2.75	-0.69	0.68
ENSMUSG00000001739	CLDN15	claudin 15	plasma membrane|tight junction|membrane|integral component of membrane|lateral plasma membrane|cell junction|	transport|ion transport|	structural molecule activity|	10	0.31	1.42	10	0.3	1.33	0.31	2.56	-0.33	0.79
ENSMUSG00000030591	PSMD8	proteasome (prosome, macropain) 26S subunit, non-ATPase, 8	proteasome complex|nucleus|proteasome regulatory particle|proteasome accessory complex|extracellular vesicular exosome|	proteolysis|	molecular_function|	10	0.1	0.411	10	0.24	2.77	0.17	2.47	-0.48	0.9
ENSMUSG00000018189	UCHL5	ubiquitin carboxyl-terminal esterase L5	proteasome complex|intracellular|nucleus|cytoplasm|cytosol|Ino80 complex|Ino80 complex|	DNA repair|DNA recombination|transcription, DNA-templated|regulation of transcription, DNA-templated|proteolysis|ubiquitin-dependent protein catabolic process|cellular response to DNA damage stimulus|negative regulation of endopeptidase activity|protein deubiquitination|lateral ventricle development|midbrain development|forebrain morphogenesis|regulation of proteasomal protein catabolic process|	ubiquitin-specific protease activity|endopeptidase inhibitor activity|peptidase activity|cysteine-type peptidase activity|omega peptidase activity|hydrolase activity|poly(A) RNA binding|proteasome binding|	10	0.24	2.66	10	0.1	0.253	0.17	2.42	-0.16	0.61
ENSMUSG00000020720	PSMD12	proteasome (prosome, macropain) 26S subunit, non-ATPase, 12	proteasome complex|proteasome regulatory particle|membrane|proteasome accessory complex|extracellular vesicular exosome|		molecular_function|	10	-0.32	3.07	10	0.43	5.3	0.38	2.41	-1.04	1.02
ENSMUSG00000037957	WDR20A	N/A				10	-0.18	1.54	10	0.28	3.75	0.24	2.37	-0.76	0.82
ENSMUSG00000078517	EMC1	ER membrane protein complex subunit 1	membrane|integral component of membrane|ER membrane protein complex|	biological_process|	molecular_function|	10	0	0	10	0.37	4.92	0.35	2.32	-0.64	1.24
ENSMUSG00000028792	AK2	adenylate kinase 2	mitochondrion|mitochondrion|mitochondrial inner membrane|mitochondrial intermembrane space|cytosol|sperm flagellum|extracellular vesicular exosome|sperm mitochondrial sheath|	nucleobase-containing compound metabolic process|ADP biosynthetic process|phosphorylation|AMP metabolic process|ATP metabolic process|dATP metabolic process|nucleotide phosphorylation|	nucleotide binding|adenylate kinase activity|ATP binding|kinase activity|transferase activity|phosphotransferase activity, phosphate group as acceptor|nucleobase-containing compound kinase activity|	10	0.2	2.78	10	0.05	0.0888	0.16	2.32	-0.2	1.03
ENSMUSG00000070934	RRAGA	Ras-related GTP binding A	nucleus|cytoplasm|lysosome|lysosomal membrane|Golgi apparatus|intracellular membrane-bounded organelle|	apoptotic process|cell death|modulation by virus of host morphology or physiology|cellular protein localization|regulation of cytolysis|positive regulation of cytolysis|cellular response to amino acid stimulus|	nucleotide binding|GTP binding|protein homodimerization activity|protein heterodimerization activity|phosphoprotein binding|	10	0.75	2.76	10	0.16	1.12	0.43	2.23	-0.33	1.37
ENSMUSG00000074698	CSNK2A1	casein kinase 2, alpha 1 polypeptide	nucleus|protein kinase CK2 complex|Sin3 complex|NuRD complex|PcG protein complex|	transcription, DNA-templated|regulation of transcription, DNA-templated|protein phosphorylation|protein phosphorylation|apoptotic process|cell cycle|positive regulation of cell proliferation|Wnt signaling pathway|phosphorylation|positive regulation of Wnt signaling pathway|positive regulation of cell growth|negative regulation of cysteine-type endopeptidase activity involved in apoptotic process|…	nucleotide binding|protein kinase activity|protein serine/threonine kinase activity|protein binding|ATP binding|beta-catenin binding|kinase activity|transferase activity|transferase activity, transferring phosphorus-containing groups|protein phosphatase regulator activity|protein N-terminus binding|	10	-0.14	1.73	10	0.79	5.56	0.78	2.23	-0.25	1.73
ENSMUSG00000024213	NUDT3	nudix (nucleotide diphosphate linked moiety X)-type motif 3	extracellular vesicular exosome|	diphosphoinositol polyphosphate catabolic process|	magnesium ion binding|diphosphoinositol-polyphosphate diphosphatase activity|	10	-0.67	4.97	10	0.14	0.813	-0.64	2.18	-1.45	0.26
ENSMUSG00000006335	TFPT	TCF3 (E2A) fusion partner	nucleus|nucleolus|cytoplasm|actin filament|Ino80 complex|	DNA repair|DNA recombination|transcription, DNA-templated|regulation of transcription, DNA-templated|apoptotic process|cellular response to DNA damage stimulus|positive regulation of apoptotic process|apoptotic signaling pathway|	DNA binding|protein kinase binding|protein heterodimerization activity|	10	-0.15	0.881	10	0.23	3.49	0.22	2.1	-0.32	0.77
ENSMUSG00000028479	GNE	glucosamine (UDP-N-acetyl)-2-epimerase/N-acetylmannosamine kinase	cytoplasm|cytosol|	carbohydrate metabolic process|UDP-N-acetylglucosamine metabolic process|N-acetylneuraminate metabolic process|metabolic process|phosphorylation|carbohydrate phosphorylation|	nucleotide binding|catalytic activity|hydrolase activity, hydrolyzing O-glycosyl compounds|ATP binding|UDP-N-acetylglucosamine 2-epimerase activity|N-acylmannosamine kinase activity|kinase activity|transferase activity|phosphotransferase activity, alcohol group as acceptor|hydrolase activity|isomerase activity|metal ion binding|	10	-0.25	2.24	10	0.23	1.37	0.28	2.05	-0.77	1.18
ENSMUSG00000028334	NANS	N-acetylneuraminic acid synthase (sialic acid synthase)	cytosol|extracellular vesicular exosome|		N-acylneuraminate-9-phosphate synthase activity|	10	0.43	3.82	10	0	0	0.37	1.97	-0.34	1.33
ENSMUSG00000036744	OLFR701	olfactory receptor 701	plasma membrane|membrane|integral component of membrane|	signal transduction|G-protein coupled receptor signaling pathway|sensory perception of smell|response to stimulus|detection of chemical stimulus involved in sensory perception of smell|	signal transducer activity|G-protein coupled receptor activity|olfactory receptor activity|	10	0.17	2.05	10	-0.12	0.154	0.15	1.87	-0.55	0.7
ENSMUSG00000029640	USP12	ubiquitin specific peptidase 12		proteolysis|ubiquitin-dependent protein catabolic process|protein deubiquitination|	cysteine-type endopeptidase activity|ubiquitin thiolesterase activity|ubiquitin-specific protease activity|peptidase activity|cysteine-type peptidase activity|hydrolase activity|ubiquitinyl hydrolase activity|	10	-0.3	2.22	10	-0.09	0.233	-0.28	1.85	-0.92	0.54
ENSMUSG00000030751	PSMA1	proteasome (prosome, macropain) subunit, alpha type 1	proteasome complex|nucleus|cytoplasm|centrosome|proteasome core complex|proteasome core complex, alpha-subunit complex|extracellular vesicular exosome|	immune system process|negative regulation of inflammatory response to antigenic stimulus|negative regulation of inflammatory response to antigenic stimulus|proteolysis|ubiquitin-dependent protein catabolic process|proteolysis involved in cellular protein catabolic process|	lipopolysaccharide binding|endopeptidase activity|threonine-type endopeptidase activity|protein binding|peptidase activity|hydrolase activity|	10	-0.21	2.24	10	0.45	1.85	-0.19	1.84	-0.72	1.29
ENSMUSG00000059355	BC056474	N/A				10	-0.18	3.23	10	0.2	0.693	-0.15	1.83	-0.57	0.48
ENSMUSG00000040865	INO80D	INO80 complex subunit D	cellular_component|nucleus|	DNA repair|DNA recombination|transcription, DNA-templated|regulation of transcription, DNA-templated|cellular response to DNA damage stimulus|biological_process|	molecular_function|	10	0	0	10	0.27	3.48	0.22	1.81	-0.28	0.9
ENSMUSG00000035845	ALG12	asparagine-linked glycosylation 12 (alpha-1,6-mannosyltransferase)	endoplasmic reticulum|membrane|membrane|integral component of membrane|	protein N-linked glycosylation|dolichol-linked oligosaccharide biosynthetic process|mannosylation|	mannosyltransferase activity|transferase activity|transferase activity, transferring glycosyl groups|dol-P-Man:Man(7)GlcNAc(2)-PP-Dol alpha-1,6-mannosyltransferase activity|	10	-0.19	2.73	10	0	0	-0.16	1.79	-0.64	0.34
ENSMUSG00000032249	ANP32A	acidic (leucine-rich) nuclear phosphoprotein 32 family, member A	nucleus|cytoplasm|endoplasmic reticulum|nuclear matrix|	transcription, DNA-templated|regulation of transcription, DNA-templated|	protein binding|protein C-terminus binding|cell adhesion molecule binding|	10	-0.15	0.53	10	0.56	4.55	0.43	1.7	-0.36	1.39
ENSMUSG00000046387	PCDHB17	protocadherin beta 17	plasma membrane|membrane|integral component of membrane|	cell adhesion|	molecular_function|	10	0.06	0.42	10	0.21	1.57	0.2	1.69	-0.38	0.95
ENSMUSG00000026792	LRSAM1	leucine rich repeat and sterile alpha motif containing 1	cytoplasm|membrane|	protein polyubiquitination|transport|protein transport|protein catabolic process|negative regulation of endocytosis|viral budding|protein autoubiquitination|ubiquitin-dependent endocytosis|	ubiquitin-protein transferase activity|zinc ion binding|UDP-N-acetylmuramoylalanyl-D-glutamyl-2,6-diaminopimelate-D-alanyl-D-alanine ligase activity|ligase activity|ribosomal S6-glutamic acid ligase activity|coenzyme F420-0 gamma-glutamyl ligase activity|coenzyme F420-2 alpha-glutamyl ligase activity|metal ion binding|protein-glycine ligase activity|protein-glycine ligase activity, initiating|pro…	10	0	0	10	0.33	3.42	0.18	1.67	-0.32	1.26
ENSMUSG00000039067	PSMD7	proteasome (prosome, macropain) 26S subunit, non-ATPase, 7	proteasome complex|nucleus|proteasome regulatory particle|membrane|extracellular vesicular exosome|			10	-0.31	2.68	10	0.27	1.46	-0.14	1.64	-0.93	0.6
ENSMUSG00000022337	EMC2	ER membrane protein complex subunit 2	nucleus|cytoplasm|mitochondrion|endoplasmic reticulum|ER membrane protein complex|	biological_process|	molecular_function|	10	0.29	2.8	10	-0.04	0.046	0.23	1.48	-0.44	1.08
ENSMUSG00000004612	NKG7	natural killer cell group 7 sequence	cellular_component|membrane|integral component of membrane|	biological_process|	molecular_function|	10	0.09	0.408	10	0.39	2.28	0.14	1.44	-1.02	1.42
ENSMUSG00000020029	NUDT4	nudix (nucleoside diphosphate linked moiety X)-type motif 4	cellular_component|cytoplasm|		RNA binding|thiamine-pyrophosphatase activity|8-oxo-7,8-dihydroguanosine triphosphate pyrophosphatase activity|diphosphoinositol-polyphosphate diphosphatase activity|UDP-2,3-diacylglucosamine hydrolase activity|bis(5'-nucleosyl)-tetraphosphatase activity|dATP pyrophosphohydrolase activity|pyrophosphatase activity|hydrolase activity|dihydroneopterin monophosphate phosphatase activity|dihydroneopte…	10	-0.18	1.85	10	0.41	3.65	0.3	1.44	-0.48	1.37
ENSMUSG00000025137	PCYT2	phosphate cytidylyltransferase 2, ethanolamine		lipid metabolic process|phospholipid biosynthetic process|biosynthetic process|	catalytic activity|ethanolamine-phosphate cytidylyltransferase activity|transferase activity|nucleotidyltransferase activity|	10	-0.21	2.65	10	0.2	1.06	-0.19	1.42	-0.75	0.61
ENSMUSG00000027634	NDRG3	N-myc downstream regulated gene 3	cytoplasm|cytoplasm|extracellular vesicular exosome|	biological_process|	molecular_function|	10	0.14	1.31	10	1.01	1.47	0.2	1.4	-0.47	2.06
ENSMUSG00000022811	ZFP148	zinc finger protein 148	nucleus|nucleus|	negative regulation of transcription from RNA polymerase II promoter|transcription, DNA-templated|regulation of transcription, DNA-templated|protein complex assembly|gamete generation|negative regulation of gene expression|negative regulation of transcription, DNA-templated|positive regulation of transcription from RNA polymerase II promoter|	transcription regulatory region sequence-specific DNA binding|nucleic acid binding|DNA binding|double-stranded DNA binding|sequence-specific DNA binding transcription factor activity|sequence-specific DNA binding|metal ion binding|	10	0	0	10	0.4	3.48	0.31	1.39	-0.32	1.25
ENSMUSG00000020823	SEC14L1	SEC14-like 1 (S. cerevisiae)	cellular_component|	biological_process|	molecular_function|	10	-0.22	0.962	10	-0.13	0.631	-0.17	1.34	-0.69	0.54
ENSMUSG00000017221	PSMD3	proteasome (prosome, macropain) 26S subunit, non-ATPase, 3	proteasome complex|nucleus|cytoplasm|proteasome regulatory particle|membrane|proteasome accessory complex|extracellular vesicular exosome|	regulation of protein catabolic process|	protein binding|enzyme regulator activity|	10	-0.11	0.513	10	-0.55	2.08	-0.16	1.32	-1.54	0.34
ENSMUSG00000017428	PSMD11	proteasome (prosome, macropain) 26S subunit, non-ATPase, 11	proteasome complex|nucleus|proteasome regulatory particle|membrane|proteasome accessory complex|proteasome accessory complex|extracellular vesicular exosome|	ubiquitin-dependent protein catabolic process|proteasome assembly|stem cell differentiation|	protein binding|	10	0.31	1.98	10	0	0	0.28	1.28	-0.32	1.14
ENSMUSG00000026069	IL1RL1	interleukin 1 receptor-like 1	extracellular region|extracellular space|plasma membrane|external side of plasma membrane|external side of plasma membrane|cell surface|membrane|integral component of membrane|extracellular matrix|	negative regulation of T-helper 1 type immune response|signal transduction|negative regulation of cell proliferation|negative regulation of interferon-gamma production|positive regulation of interleukin-5 production|interleukin-33-mediated signaling pathway|positive regulation of macrophage activation|negative regulation of I-kappaB kinase/NF-kappaB signaling|positive regulation of inflammatory r…	interleukin-33 binding|interleukin-33 receptor activity|interleukin-1 receptor activity|	10	-0.65	4.33	10	0.03	0.0367	-0.63	1.28	-1.4	0.22
ENSMUSG00000022400	RBX1	ring-box 1	ubiquitin ligase complex|nucleus|anaphase-promoting complex|cytoplasm|cytosol|SCF ubiquitin ligase complex|SCF ubiquitin ligase complex|SCF ubiquitin ligase complex|VCB complex|cullin-RING ubiquitin ligase complex|	DNA repair|ubiquitin-dependent protein catabolic process|protein monoubiquitination|cellular response to DNA damage stimulus|protein ubiquitination|protein ubiquitination|protein ubiquitination|protein catabolic process|SCF-dependent proteasomal ubiquitin-dependent protein catabolic process|	ubiquitin-protein transferase activity|ubiquitin-protein transferase activity|protein binding|eukaryotic initiation factor 4E binding|zinc ion binding|UDP-N-acetylmuramoylalanyl-D-glutamyl-2,6-diaminopimelate-D-alanyl-D-alanine ligase activity|ligase activity|ribosomal S6-glutamic acid ligase activity|protein complex binding|coenzyme F420-0 gamma-glutamyl ligase activity|coenzyme F420-2 alpha-glu…	10	0	0	10	0.2	1.84	0.15	1.23	-0.2	0.71
ENSMUSG00000026374	TSN	translin	nucleus|cytoplasm|cytoplasm|		DNA binding|single-stranded DNA binding|RNA binding|mRNA binding|nuclease activity|endonuclease activity|protein binding|hydrolase activity|protein complex binding|phosphoric ester hydrolase activity|sequence-specific DNA binding|T/G mismatch-specific endonuclease activity|retroviral 3' processing activity|	10	0.1	0.454	10	0.41	1.35	0.14	1.23	-0.27	1.33
ENSMUSG00000035203	EPN1	epsin 1	nucleus|cytoplasm|plasma membrane|coated pit|membrane|	in utero embryonic development|endocytosis|Notch signaling pathway|female pregnancy|embryonic organ development|	transcription factor binding|lipid binding|	10	-0.35	3.24	10	0	0	-0.32	1.19	-1.11	0.42
ENSMUSG00000037894	H2AFZ	H2A histone family, member Z	nucleosome|nucleus|nucleus|nucleus|chromosome|nuclear euchromatin|nuclear heterochromatin|	multicellular organismal development|positive regulation of transcription from RNA polymerase II promoter|cellular response to estradiol stimulus|	RNA polymerase II core promoter proximal region sequence-specific DNA binding|RNA polymerase II core promoter sequence-specific DNA binding|RNA polymerase II distal enhancer sequence-specific DNA binding|DNA binding|chromatin DNA binding|nucleosomal DNA binding|protein heterodimerization activity|	10	0	0	10	0.24	2.77	0.17	1.18	-0.23	0.81
ENSMUSG00000032422	SNX14	sorting nexin 14	cellular_component|membrane|integral component of membrane|	transport|protein transport|termination of G-protein coupled receptor signaling pathway|	molecular_function|phosphatidylinositol binding|	10	0.12	0.656	10	0.15	0.644	0.13	1.17	-0.48	1
ENSMUSG00000043998	MGAT2	mannoside acetylglucosaminyltransferase 2	Golgi apparatus|Golgi stack|membrane|membrane|integral component of membrane|	protein N-linked glycosylation|oligosaccharide biosynthetic process|protein N-linked glycosylation via asparagine|	alpha-1,6-mannosylglycoprotein 2-beta-N-acetylglucosaminyltransferase activity|alpha-1,6-mannosylglycoprotein 2-beta-N-acetylglucosaminyltransferase activity|transferase activity|transferase activity, transferring glycosyl groups|carbohydrate binding|	10	0	0	10	0.46	4.17	0.33	1.16	-0.16	1.12
ENSMUSG00000032806	SLC10A3	solute carrier family 10 (sodium/bile acid cotransporter family), member 3	membrane|integral component of membrane|	transport|sodium ion transport|response to organic substance|response to retinoic acid|	bile acid:sodium symporter activity|symporter activity|	10	-0.23	2.1	10	0.17	0.673	-0.13	1.14	-0.67	0.54
ENSMUSG00000001098	KCTD10	potassium channel tetramerisation domain containing 10	nucleus|cytoplasm|TCTN-B9D complex|TCTN-B9D complex|	biological_process|protein homooligomerization|	protein binding|	10	1.02	4.45	10	0	0	1.01	1.12	-0.18	2.05
ENSMUSG00000042079	HNRNPF	heterogeneous nuclear ribonucleoprotein F	nucleus|spliceosomal complex|membrane|ribonucleoprotein complex|catalytic step 2 spliceosome|	mRNA processing|RNA splicing|regulation of RNA splicing|	nucleotide binding|nucleic acid binding|RNA binding|single-stranded RNA binding|TBP-class protein binding|poly(A) RNA binding|	10	-0.22	2.14	10	0.08	0.176	-0.17	1.06	-0.68	1.03
ENSMUSG00000026750	PSMB7	proteasome (prosome, macropain) subunit, beta type 7	proteasome complex|nucleus|cytoplasm|proteasome core complex|microtubule cytoskeleton|extracellular vesicular exosome|	proteolysis|proteolysis involved in cellular protein catabolic process|	endopeptidase activity|threonine-type endopeptidase activity|peptidase activity|hydrolase activity|	10	0.88	1.77	10	0.25	1.5	0.57	1.05	-0.22	1.66
ENSMUSG00000030834	ABCC6	ATP-binding cassette, sub-family C (CFTR/MRP), member 6	plasma membrane|membrane|integral component of membrane|apical plasma membrane|lateral plasma membrane|	ATP catabolic process|transport|transmembrane transport|	nucleotide binding|ATP binding|ATPase activity|ATPase activity, coupled to transmembrane movement of substances|	10	-0.02	0.0092	10	0.21	2.77	0.13	1.04	-0.28	0.77
ENSMUSG00000002496	TSC2	tuberous sclerosis 2	intracellular|cell|cytoplasm|cytoplasm|cytoplasm|cytosol|cytoskeleton|caveola|membrane|dendrite|growth cone|TSC1-TSC2 complex|TSC1-TSC2 complex|neuron projection|neuronal cell body|intracellular membrane-bounded organelle|protein complex|membrane raft|perinuclear region of cytoplasm|	response to hypoxia|neural tube closure|negative regulation of protein kinase activity|protein import into nucleus|acute-phase response|signal transduction|heart development|protein localization|negative regulation of cell proliferation|negative regulation of cell proliferation|negative regulation of cell proliferation|phosphatidylinositol 3-kinase signaling|negative regulation of phosphatidylino…	GTPase activator activity|GTPase activator activity|protein binding|phosphatase binding|protein homodimerization activity|protein heterodimerization activity|14-3-3 protein binding|	10	0.1	0.66	10	0.1	0.418	0.1	0.991	-0.28	0.68
ENSMUSG00000036835	PSENEN	presenilin enhancer 2 homolog (C. elegans)	endoplasmic reticulum|Golgi apparatus|integral component of plasma membrane|membrane|integral component of membrane|	membrane protein ectodomain proteolysis|Notch signaling pathway|Notch receptor processing|protein processing|positive regulation of catalytic activity|	protein binding|	10	-0.1	1.07	10	-0.05	0.0513	-0.09	0.989	-0.68	0.73
ENSMUSG00000041483	ZFP281	zinc finger protein 281	nucleus|	transcription, DNA-templated|regulation of transcription, DNA-templated|embryonic body morphogenesis|negative regulation of gene expression|cell differentiation|negative regulation of transcription, DNA-templated|positive regulation of transcription, DNA-templated|stem cell differentiation|	core promoter binding|nucleic acid binding|DNA binding|sequence-specific DNA binding transcription factor activity|sequence-specific DNA binding transcription factor activity|transcription corepressor activity|protein binding|sequence-specific DNA binding|transcription regulatory region DNA binding|metal ion binding|	10	0.06	0.58	10	0.25	1.12	0.07	0.957	-0.67	1.08
ENSMUSG00000025153	FASN	fatty acid synthase	cytoplasm|mitochondrion|Golgi apparatus|plasma membrane|membrane|glycogen granule|extracellular vesicular exosome|	osteoblast differentiation|acetyl-CoA metabolic process|lipid metabolic process|fatty acid metabolic process|fatty acid biosynthetic process|metabolic process|biosynthetic process|oxidation-reduction process|cellular response to interleukin-4|	catalytic activity|fatty acid synthase activity|[acyl-carrier-protein] S-acetyltransferase activity|[acyl-carrier-protein] S-malonyltransferase activity|3-oxoacyl-[acyl-carrier-protein] synthase activity|3-oxoacyl-[acyl-carrier-protein] reductase (NADPH) activity|3-hydroxypalmitoyl-[acyl-carrier-protein] dehydratase activity|enoyl-[acyl-carrier-protein] reductase (NADPH, B-specific) activity|oleo…	10	0.14	0.391	10	0.17	0.659	0.15	0.946	-0.43	0.76
ENSMUSG00000035596	MBOAT7	membrane bound O-acyltransferase domain containing 7	membrane|membrane|integral component of membrane|	lipid metabolic process|phospholipid biosynthetic process|ventricular system development|layer formation in cerebral cortex|phosphatidylinositol metabolic process|	dihydrolipoamide branched chain acyltransferase activity|sterol O-acyltransferase activity|N-acetyltransferase activity|O-acyltransferase activity|palmitoleoyl [acyl-carrier-protein]-dependent acyltransferase activity|carnitine O-acyltransferase activity|acetyltransferase activity|C-acyltransferase activity|palmitoyltransferase activity|N-acyltransferase activity|acylglycerol O-acyltransferase ac…	10	-0.12	1.72	10	0	0	-0.09	0.939	-0.49	0.3
ENSMUSG00000031311	NONO	non-POU-domain-containing, octamer binding protein	nucleus|nucleus|membrane|nuclear matrix|paraspeckles|	DNA repair|DNA recombination|transcription, DNA-templated|regulation of transcription, DNA-templated|mRNA processing|cellular response to DNA damage stimulus|circadian rhythm|RNA splicing|regulation of circadian rhythm|negative regulation of transcription, DNA-templated|rhythmic process|	nucleotide binding|core promoter binding|nucleic acid binding|DNA binding|RNA binding|protein binding|identical protein binding|poly(A) RNA binding|	10	-0.23	0.795	10	1.59	4.45	0.08	0.916	-0.52	3.02
ENSMUSG00000069769	MSI2	musashi RNA-binding protein 2	cytoplasm|polysome|	stem cell development|	nucleotide binding|nucleic acid binding|RNA binding|single-stranded RNA binding|poly(U) RNA binding|poly(A) RNA binding|	10	-0.09	0.988	10	-0.03	0.0439	-0.08	0.892	-0.62	0.38
ENSMUSG00000021715	CWC27	CWC27 spliceosome-associated protein homolog (S. cerevisiae)	nucleus|catalytic step 2 spliceosome|	protein peptidyl-prolyl isomerization|protein folding|	peptidyl-prolyl cis-trans isomerase activity|isomerase activity|	10	0.06	0.0382	10	0.21	1.19	0.16	0.882	-0.46	0.91
ENSMUSG00000068749	PSMA5	proteasome (prosome, macropain) subunit, alpha type 5	proteasome complex|nucleus|cytoplasm|proteasome core complex|proteasome core complex, alpha-subunit complex|extracellular vesicular exosome|	proteolysis|ubiquitin-dependent protein catabolic process|proteolysis involved in cellular protein catabolic process|	endopeptidase activity|threonine-type endopeptidase activity|peptidase activity|hydrolase activity|	10	-0.17	1.6	10	0.35	1.88	-0.14	0.861	-0.54	0.77
ENSMUSG00000031749	ST3GAL2	ST3 beta-galactoside alpha-2,3-sialyltransferase 2	extracellular region|Golgi apparatus|membrane|integral component of membrane|integral component of Golgi membrane|	protein glycosylation|protein glycosylation|sialylation|sialylation|	beta-galactoside (CMP) alpha-2,3-sialyltransferase activity|sialyltransferase activity|transferase activity|transferase activity, transferring glycosyl groups|	10	-0.08	0.0739	10	0.2	1.79	0.18	0.856	-0.46	0.83
ENSMUSG00000026457	ADIPOR1	adiponectin receptor 1	plasma membrane|plasma membrane|plasma membrane|membrane|membrane|integral component of membrane|	lipid metabolic process|fatty acid metabolic process|hormone-mediated signaling pathway|hormone-mediated signaling pathway|fatty acid oxidation|fatty acid oxidation|negative regulation of cell growth|leptin-mediated signaling pathway|adiponectin-activated signaling pathway|adiponectin-activated signaling pathway|adiponectin-activated signaling pathway|positive regulation of JAK-STAT cascade|posit…	receptor activity|protein binding|protein kinase binding|hormone binding|hormone binding|hormone binding|identical protein binding|protein heterodimerization activity|adiponectin binding|	10	-0.1	1.32	10	0.15	1.06	0.14	0.814	-0.37	0.83
ENSMUSG00000028333	ANP32B	acidic (leucine-rich) nuclear phosphoprotein 32 family, member B	nucleus|nucleus|	G1/S transition of mitotic cell cycle|vasculature development|positive regulation of cell proliferation|ventricular system development|inner ear development|palate development|positive regulation of G1/S transition of mitotic cell cycle|		10	-0.13	1.24	10	0.22	0.902	-0.1	0.799	-0.49	0.91
ENSMUSG00000030103	BHLHE40	basic helix-loop-helix family, member e40	nucleus|nucleus|nucleolus|cytoplasm|Golgi apparatus|	negative regulation of transcription from RNA polymerase II promoter|negative regulation of transcription from RNA polymerase II promoter|transcription, DNA-templated|regulation of transcription, DNA-templated|transcription from RNA polymerase II promoter|transcription from RNA polymerase II promoter|response to light stimulus|entrainment of circadian clock|circadian regulation of gene expression…	sequence-specific DNA binding RNA polymerase II transcription factor activity|RNA polymerase II core promoter proximal region sequence-specific DNA binding transcription factor activity involved in negative regulation of transcription|RNA polymerase II core promoter proximal region sequence-specific DNA binding transcription factor activity involved in negative regulation of transcription|RNA pol…	10	0	0	10	0.34	2.63	0.14	0.789	-0.68	0.87
ENSMUSG00000071909	GM806	predicted gene 806	cellular_component|	biological_process|	molecular_function|	10	-0.27	2.78	10	0	0	-0.23	0.787	-0.67	0.4
ENSMUSG00000030603	PSMC4	proteasome (prosome, macropain) 26S subunit, ATPase, 4	proteasome complex|nucleus|cytoplasm|membrane|inclusion body|proteasome accessory complex|cytosolic proteasome complex|	blastocyst development|protein catabolic process|	nucleotide binding|ATP binding|hydrolase activity|	10	-0.39	2.19	10	0.16	0.711	0.1	0.772	-0.89	0.6
ENSMUSG00000058486	WDR91	WD repeat domain 91	cellular_component|	biological_process|	molecular_function|	10	-0.25	2.62	10	0.14	1.13	-0.23	0.767	-0.85	0.51
ENSMUSG00000042682	SELK	selenoprotein K	endoplasmic reticulum|endoplasmic reticulum membrane|endoplasmic reticulum membrane|plasma membrane|membrane|integral component of membrane|	transport|ion transport|calcium ion transport|response to oxidative stress|macrophage derived foam cell differentiation|protein palmitoylation|positive regulation of cell migration|positive regulation of T cell proliferation|respiratory burst after phagocytosis|regulation of protein transport|intrinsic apoptotic signaling pathway in response to endoplasmic reticulum stress|positive regulation of …	molecular_function|	10	-0.1	1.2	10	0.12	0.326	-0.08	0.742	-0.67	0.52
ENSMUSG00000038390	GPR162	G protein-coupled receptor 162	cellular_component|plasma membrane|membrane|integral component of membrane|	signal transduction|G-protein coupled receptor signaling pathway|biological_process|	molecular_function|signal transducer activity|G-protein coupled receptor activity|	10	-0.67	3.23	10	0	0	-0.64	0.719	-1.37	0.25
ENSMUSG00000022201	ZFR	zinc finger RNA binding protein	nucleus|chromosome|cytoplasm|	multicellular organismal development|	nucleic acid binding|DNA binding|RNA binding|zinc ion binding|poly(A) RNA binding|metal ion binding|	10	0.22	0.745	10	-0.19	0.367	-0.19	0.69	-1.09	0.7
ENSMUSG00000054871	TMEM158	transmembrane protein 158	cellular_component|membrane|integral component of membrane|	biological_process|	protein binding|peptide binding|	10	-0.14	1.47	10	0.17	0.706	-0.09	0.684	-0.59	0.66
ENSMUSG00000034021	PDS5B	PDS5, regulator of cohesion maintenance, homolog B (S. cerevisiae)	chromatin|nucleus|	cell cycle|mitotic sister chromatid cohesion|mitotic nuclear division|negative regulation of cell proliferation|regulation of cell proliferation|cell division|	DNA binding|	10	0.09	0.656	10	0.06	0.113	0.09	0.67	-0.39	0.73
ENSMUSG00000029434	VPS33A	vacuolar protein sorting 33A (yeast)	lysosome|lysosomal membrane|endosome|early endosome|late endosome|membrane|HOPS complex|cytoplasmic vesicle|perinuclear region of cytoplasm|	transport|vesicle docking involved in exocytosis|protein transport|vesicle-mediated transport|platelet formation|melanosome localization|lysosome localization|pigmentation|regulation of developmental pigmentation|	protein complex binding|	10	-0.18	1.51	10	0	0	-0.16	0.662	-0.64	0.24
ENSMUSG00000032570	ATP2C1	ATPase, Ca++-sequestering	Golgi membrane|Golgi apparatus|trans-Golgi network|plasma membrane|membrane|membrane|integral component of membrane|transport vesicle|secretory granule|intracellular membrane-bounded organelle|	ATP catabolic process|transport|ion transport|cation transport|calcium ion transport|manganese ion transport|cellular calcium ion homeostasis|signal transduction|epidermis development|calcium-dependent cell-cell adhesion|cellular manganese ion homeostasis|actin cytoskeleton reorganization|Golgi calcium ion homeostasis|Golgi calcium ion transport|positive regulation of I-kappaB kinase/NF-kappaB si…	nucleotide binding|signal transducer activity|calcium-transporting ATPase activity|calcium-transporting ATPase activity|calcium ion binding|ATP binding|manganese-transporting ATPase activity|hydrolase activity|cation-transporting ATPase activity|manganese ion binding|metal ion binding|	10	0.21	1.42	10	0	0	0.1	0.646	-0.62	0.89
ENSMUSG00000027291	VPS39	vacuolar protein sorting 39 (yeast)	cytoplasm|lysosome|lysosomal membrane|endosome|membrane|HOPS complex|	transport|intracellular protein transport|protein transport|vesicle-mediated transport|	small GTPase regulator activity|protein binding|	10	-0.16	0.82	10	0.44	1.15	-0.1	0.637	-0.59	1
ENSMUSG00000067567	HDAC8	histone deacetylase 8	histone deacetylase complex|nucleus|cytoplasm|	transcription, DNA-templated|regulation of transcription, DNA-templated|sister chromatid cohesion|chromatin modification|histone deacetylation|regulation of cohesin localization to chromatin|	histone deacetylase activity|transcription factor binding|hydrolase activity|histone deacetylase activity (H3-K14 specific)|NAD-dependent histone deacetylase activity (H3-K14 specific)|histone deacetylase activity (H3-K9 specific)|histone deacetylase activity (H4-K16 specific)|metal ion binding|NAD-dependent histone deacetylase activity (H3-K9 specific)|NAD-dependent histone deacetylase activity …	10	0.18	0.833	10	0.05	0.0653	0.16	0.614	-1.3	0.81
ENSMUSG00000059495	ARHGEF12	Rho guanine nucleotide exchange factor (GEF) 12	cytoplasm|membrane|extracellular vesicular exosome|	G-protein coupled receptor signaling pathway|regulation of Rho protein signal transduction|intracellular signal transduction|termination of G-protein coupled receptor signaling pathway|	G-protein coupled receptor binding|guanyl-nucleotide exchange factor activity|Rho guanyl-nucleotide exchange factor activity|GTPase activator activity|protein binding|	10	0.12	0.843	10	0.01	0.000447	0.09	0.611	-0.72	0.82
ENSMUSG00000032512	WDR48	WD repeat domain 48	nucleus|cytoplasm|lysosome|intracellular membrane-bounded organelle|	double-strand break repair via homologous recombination|cellular response to DNA damage stimulus|spermatogenesis|single fertilization|male gonad development|protein deubiquitination|multicellular organism growth|skin development|embryonic organ development|skeletal system morphogenesis|homeostasis of number of cells|positive regulation of epithelial cell proliferation|seminiferous tubule developm…	molecular_function|	10	-0.05	0.233	10	0.3	1.03	0.09	0.591	-0.62	0.82
ENSMUSG00000018286	PSMB6	proteasome (prosome, macropain) subunit, beta type 6	proteasome complex|nucleus|cytoplasm|proteasome core complex|extracellular vesicular exosome|	proteolysis|proteolysis involved in cellular protein catabolic process|	endopeptidase activity|threonine-type endopeptidase activity|peptidase activity|hydrolase activity|	10	-0.04	0.056	10	0.31	1.8	0.1	0.586	-0.31	1.1
ENSMUSG00000020368	CANX	calnexin	cell|cytoplasm|endoplasmic reticulum|endoplasmic reticulum|endoplasmic reticulum membrane|smooth endoplasmic reticulum|rough endoplasmic reticulum|ribosome|membrane|membrane|integral component of membrane|axon|dendrite cytoplasm|neuronal cell body|dendritic spine|protein complex|ER-mitochondrion membrane contact site|extracellular vesicular exosome|	protein folding|synaptic vesicle endocytosis|chaperone-mediated protein folding|clathrin-mediated endocytosis|	glycoprotein binding|calcium ion binding|protein binding|apolipoprotein binding|ionotropic glutamate receptor binding|poly(A) RNA binding|metal ion binding|unfolded protein binding|	10	-0.63	2.9	10	0	0	-0.46	0.531	-1.38	0.24
ENSMUSG00000025485	RIC8	resistance to inhibitors of cholinesterase 8 homolog (C. elegans)	cytoplasm|cytosol|plasma membrane|membrane|	in utero embryonic development|vasculature development|adenylate cyclase-inhibiting G-protein coupled receptor signaling pathway|gastrulation|regulation of G-protein coupled receptor protein signaling pathway|visual learning|response to light stimulus|cell migration involved in gastrulation|positive regulation of GTPase activity|cell-cell adhesion involved in gastrulation|basement membrane organi…	G-protein alpha-subunit binding|guanyl-nucleotide exchange factor activity|GTPase activator activity|protein binding|	10	1.03	1.7	10	0.11	0.444	-0.08	0.526	-0.68	1.9
ENSMUSG00000031157	PQBP1	polyglutamine binding protein 1	nucleus|nucleus|cytoplasm|cytoplasm|cytoplasmic stress granule|nuclear speck|neuronal ribonucleoprotein granule|	alternative mRNA splicing, via spliceosome|alternative mRNA splicing, via spliceosome|transcription, DNA-templated|regulation of transcription, DNA-templated|neuron projection development|stress granule assembly|regulation of RNA splicing|regulation of dendrite morphogenesis|	ribonucleoprotein complex binding|	10	-0.14	0.524	10	-0.08	0.141	-0.11	0.522	-0.75	0.42
ENSMUSG00000033809	ALG3	asparagine-linked glycosylation 3 (alpha-1,3-mannosyltransferase)	endoplasmic reticulum|endoplasmic reticulum membrane|membrane|integral component of membrane|	mannosylation|	alpha-1,3-mannosyltransferase activity|transferase activity|transferase activity, transferring glycosyl groups|transferase activity, transferring hexosyl groups|dol-P-Man:Man(5)GlcNAc(2)-PP-Dol alpha-1,3-mannosyltransferase activity|	10	0.05	0.195	10	0.1	0.418	0.08	0.519	-0.5	0.68
ENSMUSG00000029772	AHCYL2	S-adenosylhomocysteine hydrolase-like 2	cellular_component|	one-carbon metabolic process|	adenosylhomocysteinase activity|hydrolase activity|	10	0.18	1.1	10	0	0	0.15	0.513	-0.29	0.81
ENSMUSG00000009741	UBP1	upstream binding protein 1	nucleus|	angiogenesis|transcription, DNA-templated|regulation of transcription, DNA-templated|	DNA binding|	10	0.11	0.202	10	-0.27	1.73	-0.08	0.508	-0.71	0.59
ENSMUSG00000031156	SLC35A2	solute carrier family 35 (UDP-galactose transporter), member A2	Golgi membrane|Golgi apparatus|membrane|integral component of membrane|	transport|carbohydrate transport|nucleotide-sugar transport|UDP-galactose transmembrane transport|	nucleotide-sugar transmembrane transporter activity|sugar:proton symporter activity|UDP-galactose transmembrane transporter activity|UDP-galactose transmembrane transporter activity|	10	0.03	0.068	10	0.12	0.576	0.08	0.477	-0.31	0.68
ENSMUSG00000034216	VPS18	vacuolar protein sorting 18 (yeast)	lysosome|lysosomal membrane|endosome|early endosome|actin filament|membrane|HOPS complex|	transport|intracellular protein transport|endosome organization|endosome organization|lysosome organization|protein transport|vesicle-mediated transport|viral entry into host cell|	actin binding|protein binding|metal ion binding|	10	-0.09	0.915	10	0.12	0.468	-0.07	0.477	-0.61	0.73
ENSMUSG00000043015	TMEM194B	transmembrane protein 194B	cellular_component|membrane|integral component of membrane|	biological_process|	molecular_function|	10	-0.03	0.039	10	0.23	1.89	0.12	0.473	-0.44	0.86
ENSMUSG00000028932	PSMC2	proteasome (prosome, macropain) 26S subunit, ATPase 2	proteasome complex|cytoplasmic mRNA processing body|nucleus|cytoplasm|membrane|proteasome accessory complex|	osteoblast differentiation|ATP catabolic process|ubiquitin-dependent protein catabolic process|protein catabolic process|	nucleotide binding|protein binding|ATP binding|hydrolase activity|ATPase activity|TBP-class protein binding|	10	-0.12	1.31	10	0.29	1.48	-0.09	0.46	-0.57	0.73
ENSMUSG00000045374	WDR81	WD repeat domain 81	cellular_component|	negative regulation of phosphatase activity|	molecular_function|transferase activity, transferring phosphorus-containing groups|	10	0.01	0.00548	10	0.21	1.49	0.16	0.419	-0.4	0.83
ENSMUSG00000048076	ARF1	ADP-ribosylation factor 1	intracellular|cytoplasm|Golgi apparatus|cytosol|plasma membrane|endomembrane system|membrane|sarcomere|cell junction|neuron projection|synapse|postsynaptic membrane|extracellular vesicular exosome|	regulation of receptor internalization|transport|cellular copper ion homeostasis|small GTPase mediated signal transduction|protein transport|vesicle-mediated transport|regulation of Arp2/3 complex-mediated actin nucleation|long term synaptic depression|dendritic spine organization|	nucleotide binding|protein binding|GTP binding|poly(A) RNA binding|	10	0.01	0.0141	10	0.34	1.25	0.08	0.368	-0.64	0.83
ENSMUSG00000003948	MMD	monocyte to macrophage differentiation-associated	lysosome|endosome|membrane|integral component of membrane|	cytolysis|		10	-0.16	1.03	10	0.22	0.244	-0.13	0.36	-1.42	0.63
ENSMUSG00000075703	EPT1	ethanolaminephosphotransferase 1 (CDP-ethanolamine-specific)	cellular_component|membrane|integral component of membrane|	lipid metabolic process|biological_process|phospholipid biosynthetic process|	molecular_function|ethanolaminephosphotransferase activity|transferase activity|phosphotransferase activity, for other substituted phosphate groups|metal ion binding|	10	-0.12	0.998	10	0.19	0.689	-0.07	0.346	-0.58	0.78
ENSMUSG00000057706	MEX3B	mex3 homolog B (C. elegans)	nucleus|cytoplasm|	biological_process|	RNA binding|zinc ion binding|poly(A) RNA binding|metal ion binding|	10	0.05	0.107	10	-0.45	0.581	0.07	0.344	-0.92	1.13
ENSMUSG00000028671	GALE	galactose-4-epimerase, UDP	extracellular vesicular exosome|	carbohydrate metabolic process|galactose metabolic process|galactose catabolic process|	catalytic activity|UDP-glucose 4-epimerase activity|UDP-glucose 4-epimerase activity|isomerase activity|racemase and epimerase activity, acting on carbohydrates and derivatives|protein homodimerization activity|coenzyme binding|	10	0	0	10	0.26	1.63	0.07	0.341	-0.1	0.62
ENSMUSG00000028837	PSMB2	proteasome (prosome, macropain) subunit, beta type 2	proteasome complex|nucleus|cytoplasm|proteasome core complex|membrane|extracellular vesicular exosome|	proteolysis|proteolysis involved in cellular protein catabolic process|	endopeptidase activity|threonine-type endopeptidase activity|peptidase activity|hydrolase activity|	10	-0.05	0.191	10	0.2	1.64	0.12	0.334	-0.64	0.93
ENSMUSG00000051234	RNF7	ring finger protein 7	nucleus|nucleus|cytoplasm|cytoplasm|Cul5-RING ubiquitin ligase complex|	activation of cysteine-type endopeptidase activity involved in apoptotic process|intrinsic apoptotic signaling pathway in response to oxidative stress|apoptotic mitochondrial changes|negative regulation of apoptotic process|protein neddylation|	protein binding|zinc ion binding|NEDD8 ligase activity|metal ion binding|	10	-0.18	1.68	10	0.19	0.852	-0.14	0.333	-0.5	0.72
ENSMUSG00000042195	SLC35F2	solute carrier family 35, member F2	cellular_component|membrane|integral component of membrane|	transport|biological_process|	molecular_function|	10	-0.15	0.201	10	-0.09	0.161	-0.1	0.313	-0.64	0.44
ENSMUSG00000035158	MITF	microphthalmia-associated transcription factor	nucleus|nucleus|protein complex|	transcription, DNA-templated|regulation of transcription, DNA-templated|transcription from RNA polymerase II promoter|protein complex assembly|multicellular organismal development|regulation of gene expression|Wnt signaling pathway|cell differentiation|osteoclast differentiation|melanocyte differentiation|melanocyte differentiation|regulation of cell proliferation|camera-type eye development|nega…	RNA polymerase II core promoter proximal region sequence-specific DNA binding|RNA polymerase II core promoter proximal region sequence-specific DNA binding|RNA polymerase II core promoter sequence-specific DNA binding|RNA polymerase II core promoter proximal region sequence-specific DNA binding transcription factor activity involved in positive regulation of transcription|RNA polymerase II core p…	10	-0.05	0.262	10	-0.07	0.0925	-0.05	0.312	-0.72	0.5
ENSMUSG00000031170	SLC38A5	solute carrier family 38, member 5	plasma membrane|membrane|integral component of membrane|	amino acid transmembrane transport|neutral amino acid transport|glycine transport|L-alpha-amino acid transmembrane transport|	amino acid transmembrane transporter activity|neutral amino acid transmembrane transporter activity|glycine transmembrane transporter activity|	10	0.07	0.192	10	0.06	0.15	0.07	0.31	-0.46	0.64
ENSMUSG00000029328	HNRNPDL	heterogeneous nuclear ribonucleoprotein D-like	nucleus|nucleus|cytoplasm|extracellular vesicular exosome|	transcription, DNA-templated|regulation of transcription, DNA-templated|regulation of gene expression|mRNA metabolic process|	nucleotide binding|nucleic acid binding|DNA binding|double-stranded DNA binding|single-stranded DNA binding|RNA binding|poly(A) binding|poly(G) binding|poly(A) RNA binding|	10	0	0	10	0.2	0.931	0.12	0.296	-0.62	0.93
ENSMUSG00000036368	RMDN2	regulator of microtubule dynamics 2	cytoplasm|mitochondrion|cytoskeleton|microtubule|membrane|integral component of membrane|	biological_process|	molecular_function|	10	-0.09	0.844	10	0	0	-0.06	0.282	-0.45	0.37
ENSMUSG00000032633	FLCN	folliculin	nucleus|cytoplasm|plasma membrane|midbody|cell-cell contact zone|	negative regulation of transcription from RNA polymerase II promoter|negative regulation of transcription from RNA polymerase II promoter|in utero embryonic development|regulation of protein phosphorylation|positive regulation of protein phosphorylation|cell-cell junction assembly|positive regulation of gene expression|negative regulation of gene expression|negative regulation of mitochondrion or…	protein binding|protein complex binding|	10	-0.1	0.306	10	0.22	0.919	0.17	0.273	-0.58	0.79
ENSMUSG00000004099	DNMT1	DNA methyltransferase (cytosine-5) 1	heterochromatin|nucleus|nucleus|replication fork|centromeric heterochromatin|cytoplasm|protein complex|	negative regulation of transcription from RNA polymerase II promoter|DNA methylation|DNA methylation|transcription, DNA-templated|regulation of transcription, DNA-templated|metabolic process|maintenance of DNA methylation|maintenance of DNA methylation|DNA methylation on cytosine within a CG sequence|regulation of gene expression|positive regulation of gene expression|gene silencing|chromatin mod…	DNA binding|DNA binding|chromatin binding|double-stranded DNA binding|RNA binding|catalytic activity|DNA (cytosine-5-)-methyltransferase activity|DNA (cytosine-5-)-methyltransferase activity|protein binding|transcription factor binding|methyltransferase activity|zinc ion binding|methyl-CpG binding|methyl-CpG binding|DNA-methyltransferase activity|transferase activity|protein domain specific bindi…	10	0.1	0.422	10	0	0	0.08	0.261	-0.34	0.67
ENSMUSG00000042548	ASXL1	additional sex combs like 1	nuclear chromatin|nucleus|PR-DUB complex|extracellular vesicular exosome|	negative regulation of transcription from RNA polymerase II promoter|transcription, DNA-templated|regulation of transcription, DNA-templated|chromatin modification|response to retinoic acid|negative regulation of peroxisome proliferator activated receptor signaling pathway|monoubiquitinated histone H2A deubiquitination|negative regulation of fat cell differentiation|positive regulation of transcr…	DNA binding|transcription coactivator activity|transcription corepressor activity|protein binding|retinoic acid receptor binding|peroxisome proliferator activated receptor binding|metal ion binding|	10	-0.11	0.325	10	0.15	1.42	0.09	0.221	-0.54	0.8
ENSMUSG00000027131	EMC4	ER membrane protein complex subunit 4	membrane|integral component of membrane|ER membrane protein complex|	apoptotic process|biological_process|	molecular_function|	10	-0.05	0.338	10	0	0	-0.04	0.213	-0.63	0.57
ENSMUSG00000021733	SLC4A7	solute carrier family 4, sodium bicarbonate cotransporter, member 7	cytoplasm|plasma membrane|membrane|integral component of membrane|basolateral plasma membrane|basolateral plasma membrane|apical plasma membrane|apical plasma membrane|cytoplasmic vesicle|cell projection|	transport|ion transport|sodium ion transport|anion transport|visual perception|cochlear nucleus development|retinal cell programmed cell death|auditory receptor cell development|camera-type eye photoreceptor cell differentiation|retina vasculature morphogenesis in camera-type eye|	transporter activity|inorganic anion exchanger activity|anion transmembrane transporter activity|symporter activity|	10	0.04	0.0619	10	0.19	0.46	0.05	0.207	-0.63	0.84
ENSMUSG00000042426	DHX29	DEAH (Asp-Glu-Ala-His) box polypeptide 29	cytoplasm|mitochondrion|eukaryotic 43S preinitiation complex|	translation|translational initiation|biological_process|	nucleotide binding|nucleic acid binding|translation initiation factor activity|helicase activity|ATP binding|ATP-dependent helicase activity|hydrolase activity|ribosomal small subunit binding|poly(A) RNA binding|	10	-0.06	0.282	10	0.58	2.51	0.34	0.205	-0.36	1.24
ENSMUSG00000034673	PBX2	pre B cell leukemia homeobox 2	nucleus|nucleus|transcription factor complex|	transcription, DNA-templated|regulation of transcription, DNA-templated|proximal/distal pattern formation|embryonic limb morphogenesis|positive regulation of transcription from RNA polymerase II promoter|	DNA binding|chromatin binding|sequence-specific DNA binding transcription factor activity|protein binding|transcription factor binding|sequence-specific DNA binding|	10	-0.19	0.764	10	0.02	0.0134	-0.06	0.194	-0.71	0.54
ENSMUSG00000029617	CCZ1	CCZ1 vacuolar protein trafficking and biogenesis associated	cellular_component|lysosome|membrane|	biological_process|	molecular_function|	10	-0.19	0.552	10	0.07	0.148	-0.05	0.18	-0.94	0.68
ENSMUSG00000034652	CD300A	CD300A antigen	plasma membrane|membrane|integral component of membrane|extracellular vesicular exosome|	immune system process|serotonin secretion by mast cell|receptor-mediated endocytosis|signal transduction|negative regulation of serotonin secretion|negative regulation of B cell proliferation|positive regulation of phosphoprotein phosphatase activity|negative regulation of mast cell activation involved in immune response|negative regulation of mast cell degranulation|negative regulation of mast c…	phosphatidylserine binding|protein binding|phosphatidylethanolamine binding|phosphatase binding|signaling receptor activity|	10	0.07	0.174	10	0.03	0.0407	0.06	0.173	-0.61	0.61
ENSMUSG00000041236	VPS41	vacuolar protein sorting 41 (yeast)	lysosomal membrane|early endosome|late endosome|Golgi-associated vesicle|cytosol|microtubule cytoskeleton|membrane|HOPS complex|	transport|intracellular protein transport|protein transport|vesicle-mediated transport|Golgi vesicle transport|	protein binding|microtubule binding|zinc ion binding|metal ion binding|	10	-0.15	1.12	10	0	0	-0.11	0.161	-0.65	0.5
ENSMUSG00000013415	IGF2BP1	insulin-like growth factor 2 mRNA binding protein 1	nucleus|cytoplasm|cytoplasmic stress granule|dendrite|ribonucleoprotein complex|cell projection|CRD-mediated mRNA stability complex|	RNA localization|regulation of translation|transport|regulation of mRNA stability involved in response to stress|negative regulation of translation|mRNA transport|CRD-mediated mRNA stabilization|	nucleotide binding|nucleic acid binding|RNA binding|mRNA binding|mRNA 3'-UTR binding|poly(A) RNA binding|translation regulator activity|mRNA 5'-UTR binding|	10	-0.13	1.03	10	0.19	0.905	0.08	0.149	-0.56	0.73
ENSMUSG00000029687	EZH2	enhancer of zeste homolog 2 (Drosophila)	nuclear chromatin|nuclear chromatin|nucleus|nucleus|chromosome|cytoplasm|ESC/E(Z) complex|ESC/E(Z) complex|pronucleus|	negative regulation of transcription from RNA polymerase II promoter|negative regulation of transcription from RNA polymerase II promoter|regulation of protein phosphorylation|DNA methylation|transcription, DNA-templated|regulation of transcription, DNA-templated|regulation of transcription from RNA polymerase II promoter|regulation of gene expression|negative regulation of gene expression|positi…	regulatory region DNA binding|core promoter binding|chromatin binding|chromatin binding|RNA binding|RNA binding|protein binding|methyltransferase activity|transferase activity|histone-lysine N-methyltransferase activity|chromatin DNA binding|histone methyltransferase activity|histone methyltransferase activity|sequence-specific DNA binding|	10	0.06	0.251	10	0	0	0.05	0.146	-0.5	0.77
ENSMUSG00000072582	PTRH2	peptidyl-tRNA hydrolase 2	mitochondrion|mitochondrion|cytosol|membrane|	negative regulation of gene expression|positive regulation of anoikis|negative regulation of anoikis|	aminoacyl-tRNA hydrolase activity|hydrolase activity|	10	-0.11	0.595	10	0.1	0.0842	-0.05	0.132	-0.63	0.76
ENSMUSG00000000131	XPO6	exportin 6	nucleus|nucleolus|cytoplasm|plasma membrane|	protein export from nucleus|transport|intracellular protein transport|protein transport|	Ran GTPase binding|protein transporter activity|	10	-0.12	0.828	10	0.13	0.145	-0.06	0.125	-0.66	0.69
ENSMUSG00000036622	ATP13A2	ATPase type 13A2	lysosome|lysosomal membrane|membrane|integral component of membrane|	cation transport|	nucleotide binding|ATP binding|hydrolase activity|ATPase activity|cation-transporting ATPase activity|metal ion binding|	10	-0.04	0.138	10	0.03	0.0433	-0.04	0.122	-0.65	0.55
ENSMUSG00000024456	DIAP1	diaphanous homolog 1 (Drosophila)	cytoplasm|cytoskeleton|plasma membrane|membrane|ruffle membrane|cell projection|neuron projection|mitotic spindle|	cytoskeleton organization|actin filament organization|sensory perception of sound|regulation of cell shape|cellular component organization|actin cytoskeleton organization|actin filament polymerization|positive regulation of cell migration|neuron projection development|regulation of microtubule-based process|protein localization to microtubule|regulation of release of sequestered calcium ion into …	actin binding|protein binding|profilin binding|Rho GTPase binding|identical protein binding|ion channel binding|ion channel binding|poly(A) RNA binding|	10	-0.05	0.134	10	0.39	2.18	0.04	0.122	-0.39	0.97
ENSMUSG00000032324	TSPAN3	tetraspanin 3	membrane|integral component of membrane|extracellular vesicular exosome|			10	-0.13	0.612	10	0.03	0.0299	-0.06	0.121	-0.63	0.55
ENSMUSG00000017756	SLC12A7	solute carrier family 12, member 7	plasma membrane|membrane|integral component of membrane|	transport|ion transport|potassium ion transport|cell volume homeostasis|transmembrane transport|	symporter activity|cation:chloride symporter activity|potassium:chloride symporter activity|protein kinase binding|	10	-0.01	0.00151	10	0.84	2.74	0.08	0.109	-0.32	1.77
ENSMUSG00000004677	MYO9B	myosin IXb	ruffle|ruffle|intracellular|cytoplasm|cytoskeleton|actin filament|cell cortex|membrane|myosin complex|lamellipodium|lamellipodium|filamentous actin|filopodium tip|perinuclear region of cytoplasm|	monocyte chemotaxis|ATP catabolic process|signal transduction|Rho protein signal transduction|Rho protein signal transduction|establishment of cell polarity|positive regulation of Rho GTPase activity|positive regulation of Rho GTPase activity|positive regulation of Rho GTPase activity|actin-myosin filament sliding|intracellular signal transduction|positive regulation of GTPase activity|macrophage…	microfilament motor activity|microfilament motor activity|nucleotide binding|motor activity|actin binding|GTPase activator activity|Rho GTPase activator activity|Rho GTPase activator activity|Rho GTPase activator activity|calmodulin binding|ATP binding|zinc ion binding|ATPase activity|actin-dependent ATPase activity|ATP-dependent protein binding|ADP binding|metal ion binding|actin filament bindin…	10	-0.04	0.172	10	0.13	0.569	-0.03	0.104	-0.57	0.78
ENSMUSG00000063728	MAGEA6	melanoma antigen, family A, 6	cellular_component|	biological_process|	molecular_function|	10	-0.2	0.815	10	0	0	-0.03	0.0592	-0.7	0.54
ENSMUSG00000022387	BRD1	bromodomain containing 1	nucleus|MOZ/MORF histone acetyltransferase complex|	histone H3 acetylation|	histone binding|metal ion binding|	10	-0.02	0.0258	10	0.13	0.699	0.03	0.0457	-0.59	0.66
ENSMUSG00000020611	GNA13	guanine nucleotide binding protein, alpha 13	intracellular|nucleus|cytoplasm|heterotrimeric G-protein complex|heterotrimeric G-protein complex|heterotrimeric G-protein complex|membrane|membrane|brush border membrane|brush border membrane|extracellular vesicular exosome|	angiogenesis|patterning of blood vessels|in utero embryonic development|GTP catabolic process|signal transduction|G-protein coupled receptor signaling pathway|G-protein coupled receptor signaling pathway|G-protein coupled receptor signaling pathway|adenylate cyclase-activating G-protein coupled receptor signaling pathway|positive regulation of cytosolic calcium ion concentration|small GTPase medi…	nucleotide binding|G-protein coupled receptor binding|GTPase activity|GTPase activity|GTPase activity|signal transducer activity|protein binding|GTP binding|guanyl nucleotide binding|G-protein beta/gamma-subunit complex binding|type 1 angiotensin receptor binding|type 1 angiotensin receptor binding|D5 dopamine receptor binding|D5 dopamine receptor binding|metal ion binding|	10	-0.1	0.739	10	0.04	0.0549	-0.03	0.0282	-0.66	0.42
ENSMUSG00000019787	TRDN	triadin	intracellular|cell|cytoplasm|endoplasmic reticulum|plasma membrane|junctional sarcoplasmic reticulum membrane|membrane|sarcoplasmic reticulum|junctional membrane complex|calcium channel complex|intracellular membrane-bounded organelle|	cellular calcium ion homeostasis|regulation of release of sequestered calcium ion into cytosol by sarcoplasmic reticulum|release of sequestered calcium ion into cytosol by sarcoplasmic reticulum|cytoplasmic microtubule organization|negative regulation of release of sequestered calcium ion into cytosol|positive regulation of release of sequestered calcium ion into cytosol|heart contraction|heart c…		10	-0.14	0.457	10	0	0	-0.02	0.027	-0.49	0.46
ENSMUSG00000061461	SMIM20	small integral membrane protein 20	cellular_component|	biological_process|	molecular_function|	10	-0.04	0.106	10	0.69	0.754	-0.02	0.026	-0.5	1.43
ENSMUSG00000041423	PAQR6	progestin and adipoQ receptor family member VI	cellular_component|membrane|integral component of membrane|	biological_process|	receptor activity|	10	-0.07	0.29	10	0	0	-0.03	0.022	-0.52	0.42
ENSMUSG00000001441	NPEPPS	aminopeptidase puromycin sensitive	nucleus|cytoplasm|extracellular vesicular exosome|	proteolysis|cellular response to hypoxia|	aminopeptidase activity|peptidase activity|metallopeptidase activity|zinc ion binding|hydrolase activity|metal ion binding|	10	-0.03	0.0803	10	0.19	1.54	0.09	0.0214	-0.41	0.69
ENSMUSG00000015341	GOLGA7	golgi autoantigen, golgin subfamily a, 7	Golgi membrane|palmitoyltransferase complex|Golgi apparatus|Golgi stack|membrane|intrinsic component of Golgi membrane|extracellular vesicular exosome|	Golgi to plasma membrane transport|peptidyl-L-cysteine S-palmitoylation|Golgi to plasma membrane protein transport|protein stabilization|	molecular_function|	10	-0.01	0.00507	10	-0.03	0.0227	-0.01	0.0162	-0.5	0.63
ENSMUSG00000042348	ARL15	ADP-ribosylation factor-like 15	intracellular|extracellular vesicular exosome|	small GTPase mediated signal transduction|biological_process|	nucleotide binding|GTP binding|	10	-0.01	0.014	10	-0.5	0.953	-0.02	0.016	-1.17	0.56
ENSMUSG00000007815	RHOA	ras homolog gene family, member A	intracellular|nucleus|cytoplasm|mitochondrion|cytosol|cytosol|cytosol|cytoskeleton|plasma membrane|cell cortex|membrane|lamellipodium|axon|ruffle membrane|cell projection|apical junction complex|extracellular vesicular exosome|	cell morphogenesis|GTP catabolic process|GTP catabolic process|regulation of transcription from RNA polymerase II promoter|cytoskeleton organization|cell cycle|cell adhesion|cell-matrix adhesion|integrin-mediated signaling pathway|small GTPase mediated signal transduction|Rho protein signal transduction|skeletal muscle tissue development|cerebral cortex cell migration|forebrain radial glial cell …	nucleotide binding|GTPase activity|GTPase activity|GTPase activity|protein binding|GTP binding|myosin binding|GDP binding|protein domain specific binding|	10	-0.07	0.208	10	0	0	-0.01	0.00438	-0.57	0.78
ENSMUSG00000023170	GPS2	G protein pathway suppressor 2	nucleus|transcriptional repressor complex|	negative regulation of transcription from RNA polymerase II promoter|negative regulation of JNK cascade|	transcription corepressor activity|protein binding|	10	0.01	0.0025	10	0	0	0	0	-0.56	0.52
ENSMUSG00000051989	SMIM11	small integral membrane protein 11	cellular_component|membrane|integral component of membrane|	biological_process|	molecular_function|	10	0	0	10	-0.04	0.0556	0	0	-0.41	0.36
ENSMUSG00000027411	VPS16	vacuolar protein sorting 16 (yeast)	cytoplasm|lysosome|lysosomal membrane|endosome|early endosome|early endosome|late endosome|actin filament|membrane|axon|HOPS complex|neuronal cell body|recycling endosome|	transport|intracellular protein transport|protein transport|viral entry into host cell|	actin binding|protein binding|actin filament binding|	10	0	0	10	-0.05	0.0666	0	0	-0.62	0.51
ENSMUSG00000074794	ARRDC3	arrestin domain containing 3	cytoplasm|endosome|plasma membrane|	temperature homeostasis|negative regulation of heat generation|skin development|negative regulation of multicellular organismal metabolic process|positive regulation of ubiquitin-protein transferase activity|fat pad development|positive regulation of adrenergic receptor signaling pathway|negative regulation of locomotion involved in locomotory behavior|	beta-3 adrenergic receptor binding|	10	0.21	1.07	10	-0.14	0.206	0	0	-0.73	0.63
ENSMUSG00000038175	MYLIP	myosin regulatory light chain interacting protein	intracellular|cytoplasm|cytoskeleton|plasma membrane|membrane|extrinsic component of membrane|	cellular component movement|nervous system development|negative regulation of low-density lipoprotein particle clearance|protein ubiquitination|protein ubiquitination|protein destabilization|regulation of low-density lipoprotein particle receptor catabolic process|cholesterol homeostasis|protein ubiquitination involved in ubiquitin-dependent protein catabolic process|positive regulation of protei…	ubiquitin-protein transferase activity|ubiquitin-protein transferase activity|cytoskeletal protein binding|zinc ion binding|UDP-N-acetylmuramoylalanyl-D-glutamyl-2,6-diaminopimelate-D-alanyl-D-alanine ligase activity|ligase activity|ribosomal S6-glutamic acid ligase activity|coenzyme F420-0 gamma-glutamyl ligase activity|coenzyme F420-2 alpha-glutamyl ligase activity|metal ion binding|protein-gly…	10	0	0	10	-0.05	0.0765	0	0	-0.61	0.51
ENSMUSG00000079477	RAB7	RAB7, member RAS oncogene family	intracellular|cell|cytoplasm|lysosome|lysosome|endosome|late endosome|late endosome|late endosome|Golgi apparatus|membrane|cytoplasmic vesicle|intracellular membrane-bounded organelle|phagocytic vesicle|extracellular vesicular exosome|alveolar lamellar body|	GTP catabolic process|protein targeting to lysosome|transport|intracellular protein transport|epidermal growth factor catabolic process|small GTPase mediated signal transduction|endosome to lysosome transport|protein transport|early endosome to late endosome transport|bone resorption|phagosome acidification|phagosome-lysosome fusion|	nucleotide binding|GTPase activity|protein binding|GTP binding|GDP binding|Rac GTPase binding|	10	-0.58	2.02	10	0	0	0	0	-1.2	0.34
ENSMUSG00000052056	ZFP217	zinc finger protein 217	histone deacetylase complex|nucleoplasm|	regulation of transcription, DNA-templated|cell aging|negative regulation of transcription, DNA-templated|	transcription regulatory region DNA binding|	10	-0.08	0.418	10	0.03	0.0342	0	0	-0.49	0.56
ENSMUSG00000017299	DNTTIP1	deoxynucleotidyltransferase, terminal, interacting protein 1	nucleus|	positive regulation of catalytic activity|	DNA binding|enzyme activator activity|transferase activity|protein homodimerization activity|	10	0	0	10	-0.05	0.0608	0	0	-0.52	0.39
ENSMUSG00000032412	ATP1B3	ATPase, Na+/K+ transporting, beta 3 polypeptide	cytoplasm|plasma membrane|sodium:potassium-exchanging ATPase complex|caveola|membrane|integral component of membrane|extracellular vesicular exosome|	ATP catabolic process|transport|ion transport|potassium ion transport|sodium ion transport|metal ion transport|sodium ion transmembrane transport|potassium ion transmembrane transport|	sodium:potassium-exchanging ATPase activity|protein binding|	10	-0.19	0.797	10	0.27	1.59	0	0	-0.94	0.93
ENSMUSG00000033161	ATP1A1	ATPase, Na+/K+ transporting, alpha 1 polypeptide	endosome|endoplasmic reticulum|Golgi apparatus|plasma membrane|plasma membrane|sodium:potassium-exchanging ATPase complex|caveola|membrane|integral component of membrane|basolateral plasma membrane|apical plasma membrane|T-tubule|sarcolemma|protein complex|membrane raft|extracellular vesicular exosome|	regulation of the force of heart contraction|regulation of sodium ion transport|ATP catabolic process|ATP biosynthetic process|transport|ion transport|cation transport|potassium ion transport|sodium ion transport|regulation of blood pressure|potassium ion import|monovalent inorganic cation transport|dephosphorylation|negative regulation of glucocorticoid biosynthetic process|sodium ion transmembr…	nucleotide binding|sodium:potassium-exchanging ATPase activity|sodium:potassium-exchanging ATPase activity|sodium:potassium-exchanging ATPase activity|protein binding|ATP binding|monovalent inorganic cation transmembrane transporter activity|hydrolase activity|phosphatase activity|hydrolase activity, acting on acid anhydrides, catalyzing transmembrane movement of substances|cation-transporting AT…	10	-0.01	0.00922	10	0	0	0	0	-0.47	0.57
ENSMUSG00000020346	MGAT1	mannoside acetylglucosaminyltransferase 1	Golgi apparatus|membrane|membrane|integral component of membrane|extracellular vesicular exosome|	in utero embryonic development|UDP-N-acetylglucosamine catabolic process|protein glycosylation|	alpha-1,3-mannosylglycoprotein 2-beta-N-acetylglucosaminyltransferase activity|acetylglucosaminyltransferase activity|acetylglucosaminyltransferase activity|transferase activity|transferase activity, transferring glycosyl groups|metal ion binding|	10	0	0	10	0.15	0.0979	0	0	-0.5	0.78
ENSMUSG00000020708	PSMC5	protease (prosome, macropain) 26S subunit, ATPase 5	proteasome complex|nucleus|holo TFIIH complex|cytoplasm|proteasome regulatory particle|membrane|inclusion body|proteasome accessory complex|cytoplasmic vesicle|nuclear proteasome complex|cytosolic proteasome complex|extracellular vesicular exosome|blood microparticle|	ATP catabolic process|proteolysis|protein catabolic process|proteasome-mediated ubiquitin-dependent protein catabolic process|negative regulation of transcription, DNA-templated|positive regulation of inclusion body assembly|	nucleotide binding|receptor binding|protein binding|ATP binding|transcription factor binding|transcription factor binding|peptidase activity|hydrolase activity|ATPase activity|TBP-class protein binding|thyrotropin-releasing hormone receptor binding|	10	-0.01	0.035	10	0.21	1.03	0	0	-0.62	0.75
ENSMUSG00000026737	PIP4K2A	phosphatidylinositol-5-phosphate 4-kinase, type II, alpha	nucleus|cytoplasm|plasma membrane|membrane|	phosphorylation|megakaryocyte development|phosphatidylinositol metabolic process|	nucleotide binding|ATP binding|kinase activity|phosphatidylinositol phosphate kinase activity|1-phosphatidylinositol-5-phosphate 4-kinase activity|transferase activity|	10	0	0	10	-0.06	0.0418	0	0	-0.55	0.35
ENSMUSG00000014498	ANKRD52	ankyrin repeat domain 52	cellular_component|	biological_process|	molecular_function|	10	-0.17	0.901	10	0.1	0.178	0	0	-0.56	0.49
ENSMUSG00000022952	RUNX1	runt related transcription factor 1	basement membrane|nucleus|nucleus|	skeletal system development|in utero embryonic development|liver development|myeloid progenitor cell differentiation|transcription, DNA-templated|regulation of transcription, DNA-templated|central nervous system development|regulation of signal transduction|hemopoiesis|hemopoiesis|myeloid cell differentiation|neuron differentiation|negative regulation of granulocyte differentiation|positive regul…	regulatory region DNA binding|DNA binding|DNA binding|sequence-specific DNA binding transcription factor activity|sequence-specific DNA binding transcription factor activity|calcium ion binding|protein binding|ATP binding|transcription factor binding|protein homodimerization activity|protein heterodimerization activity|repressing transcription factor binding|	10	0	0	10	0.04	0.0386	0	0	-0.64	0.57
ENSMUSG00000090958	LRRC32	leucine rich repeat containing 32		positive regulation of gene expression|negative regulation of activated T cell proliferation|negative regulation of cytokine secretion|		10	-0.06	0.0453	10	0.1	0.459	0	0	-0.51	0.65
ENSMUSG00000032127	VPS11	vacuolar protein sorting 11 (yeast)	lysosome|lysosomal membrane|endosome|early endosome|actin filament|membrane|endocytic vesicle|HOPS complex|cytoplasmic vesicle|	transport|intracellular protein transport|biological_process|protein transport|vesicle-mediated transport|	nucleotide binding|protein binding|zinc ion binding|metal ion binding|	10	0	0	10	0.8	1.35	0	0	-0.28	1.61
ENSMUSG00000047260	EMC6	ER membrane protein complex subunit 6	endoplasmic reticulum|membrane|integral component of membrane|ER membrane protein complex|	biological_process|	molecular_function|	10	0	0	10	0.05	0.0711	0	0	-0.51	0.65
